# Supplementary material
Source: publisher figshare collection journal article supplement (https://gsajournals.figshare.com/articles/dataset/_/14903283)
Supplement: Supplementary file 1 [file 1]

GWAS SNP ALL

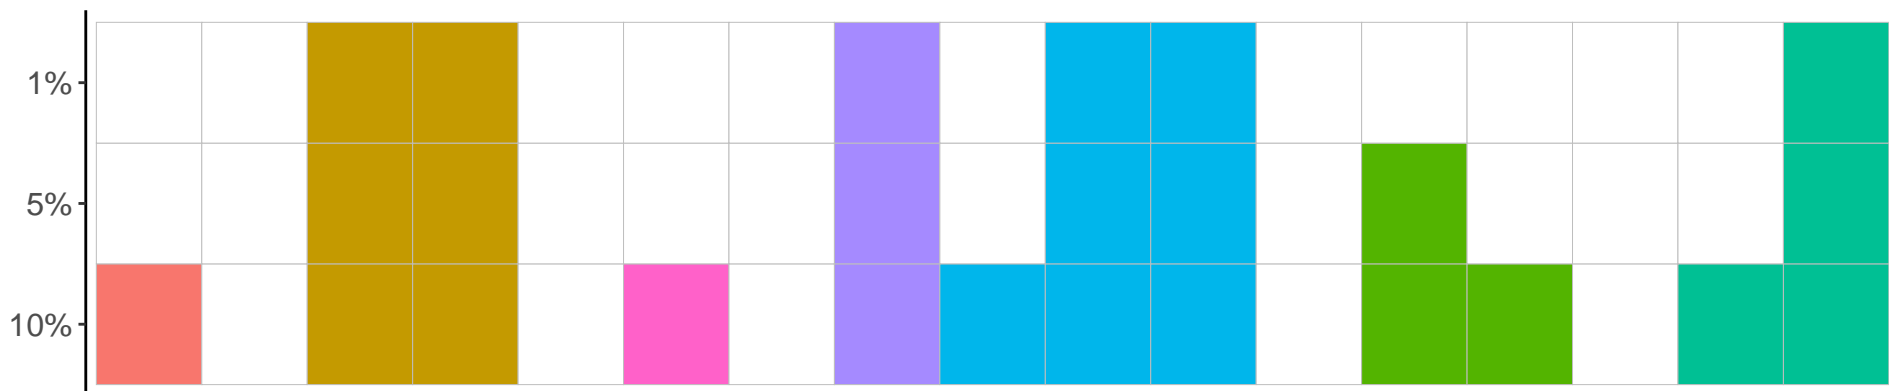

QTL F ALL

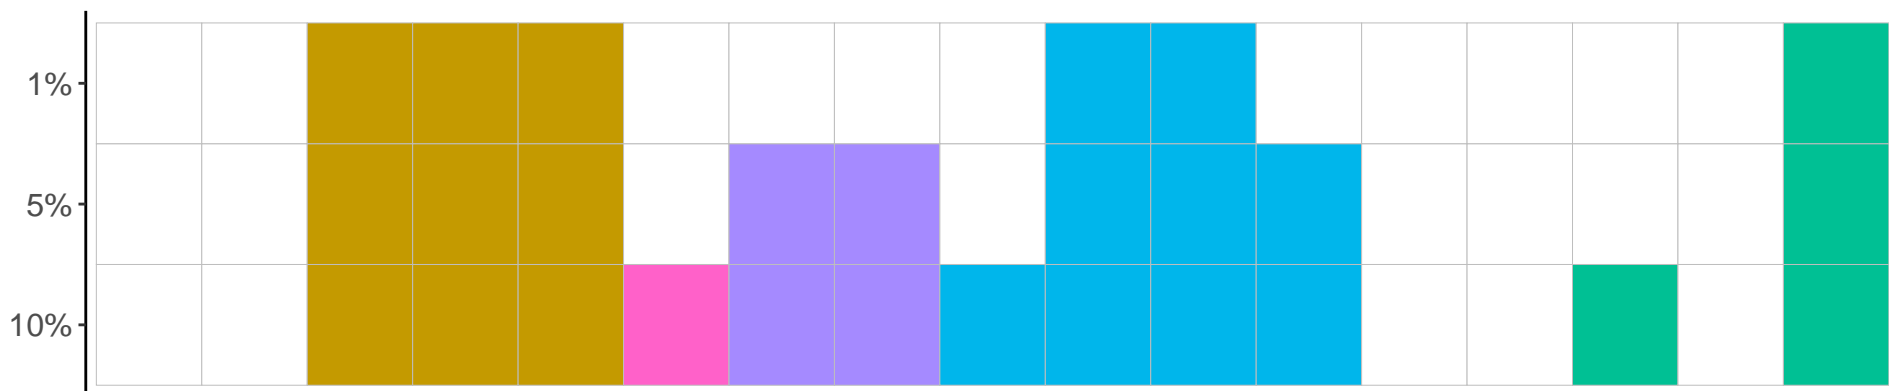

QTL H ALL

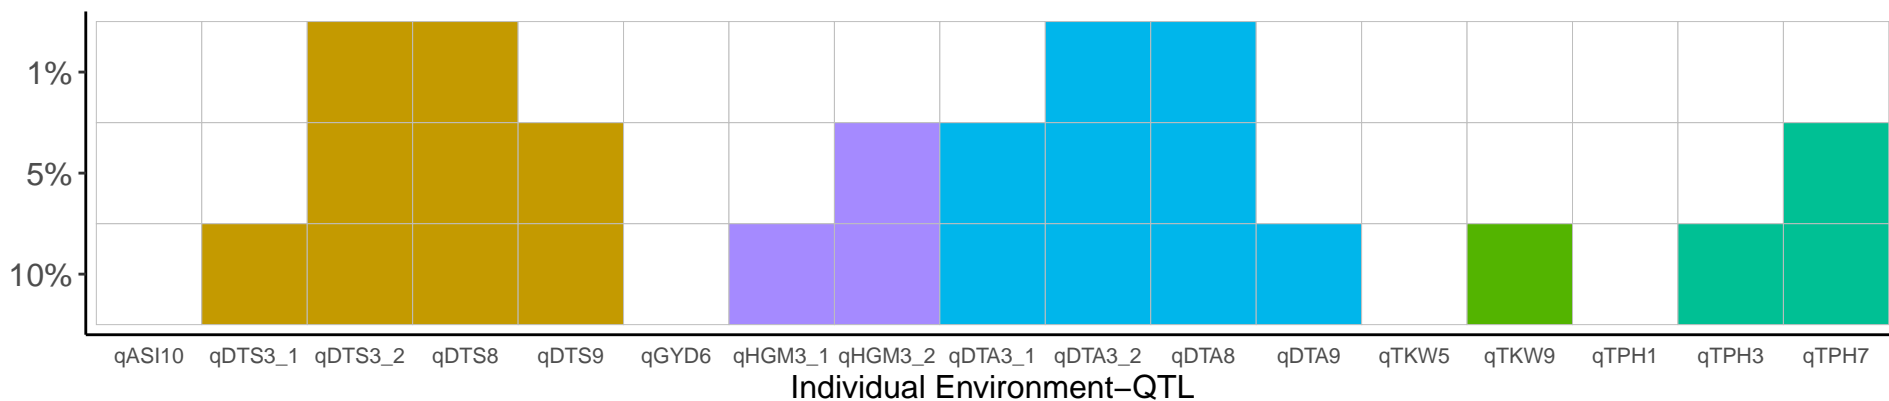

Phenotype

|                                                              |                                                      |                                                             |                                                  |
|--------------------------------------------------------------|------------------------------------------------------|-------------------------------------------------------------|--------------------------------------------------|
| <span style="color: red;">■</span> Anthesis–Silking Interval | <span style="color: pink;">■</span> Grain Yield      | <span style="color: blue;">■</span> Days to Anthesis        | <span style="color: teal;">■</span> Plant Height |
| <span style="color: olive;">■</span> Days to Silking         | <span style="color: purple;">■</span> Grain Moisture | <span style="color: green;">■</span> Thousand Kernel Weight |                                                  |

GWAS SNP BLOIS\_2014\_OPT

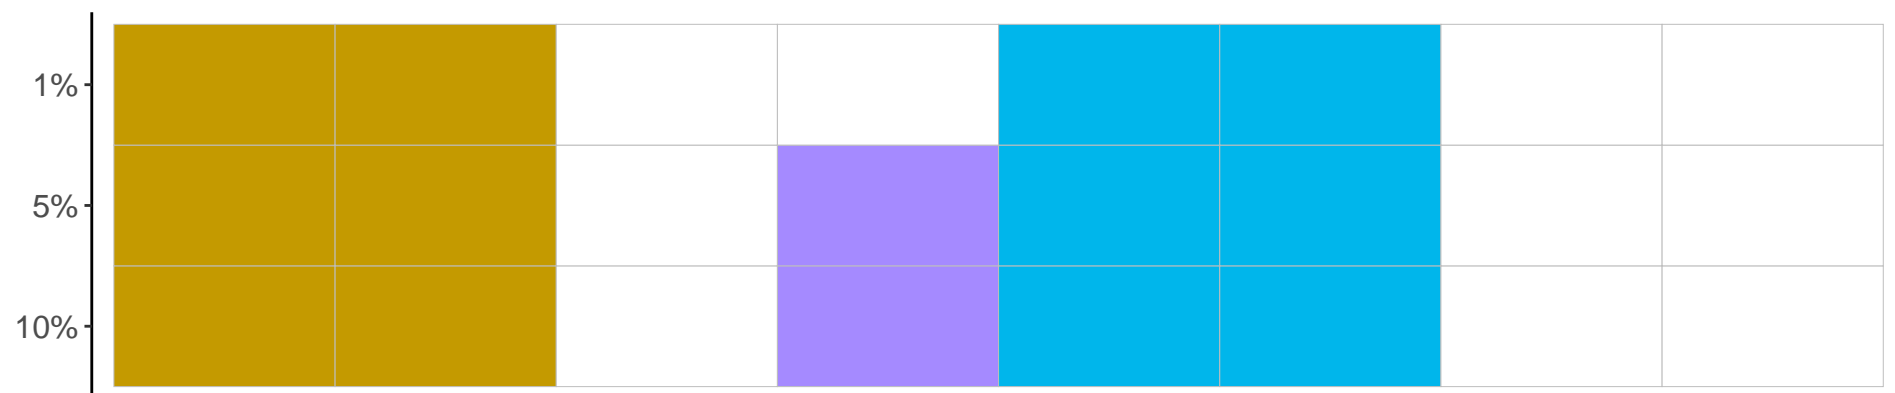

QTL F BLOIS\_2014\_OPT

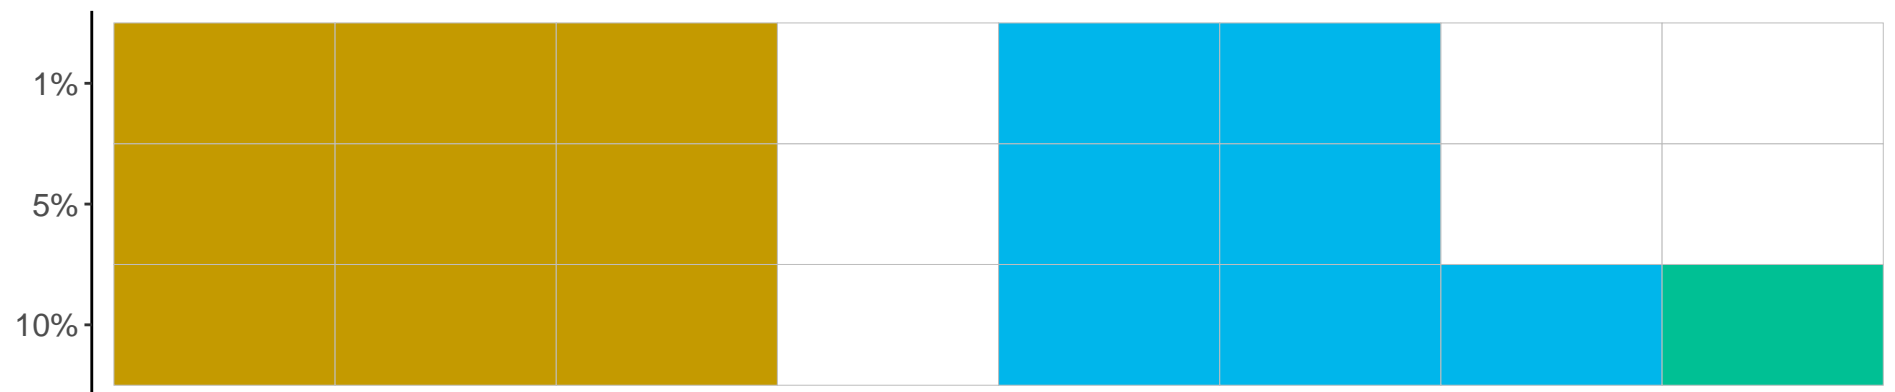

QTL H BLOIS\_2014\_OPT

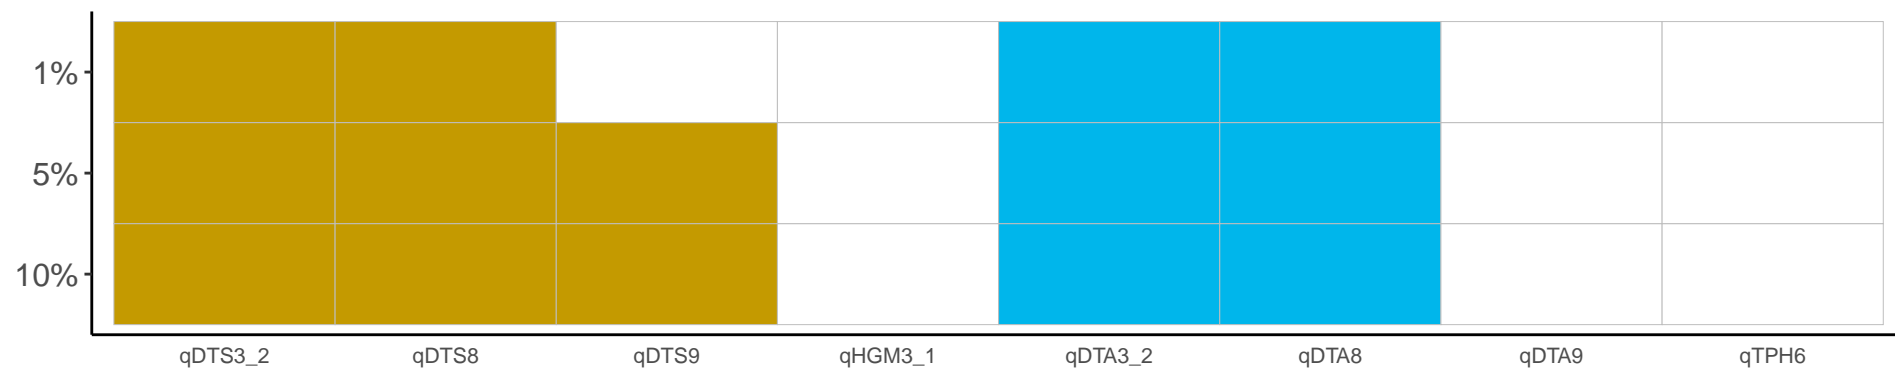

Individual Environment-QTL

Phenotype

|                                                              |                                                      |                                                             |                                                   |
|--------------------------------------------------------------|------------------------------------------------------|-------------------------------------------------------------|---------------------------------------------------|
| <span style="color: yellow;">■</span> Days to Silking        | <span style="color: purple;">■</span> Grain Moisture | <span style="color: blue;">■</span> Days to Anthesis        | <span style="color: green;">■</span> Plant Height |
| <span style="color: red;">■</span> Anthesis-Silking Interval | <span style="color: pink;">■</span> Grain Yield      | <span style="color: green;">■</span> Thousand Kernel Weight |                                                   |

GWAS SNP BLOIS\_2017\_OPT

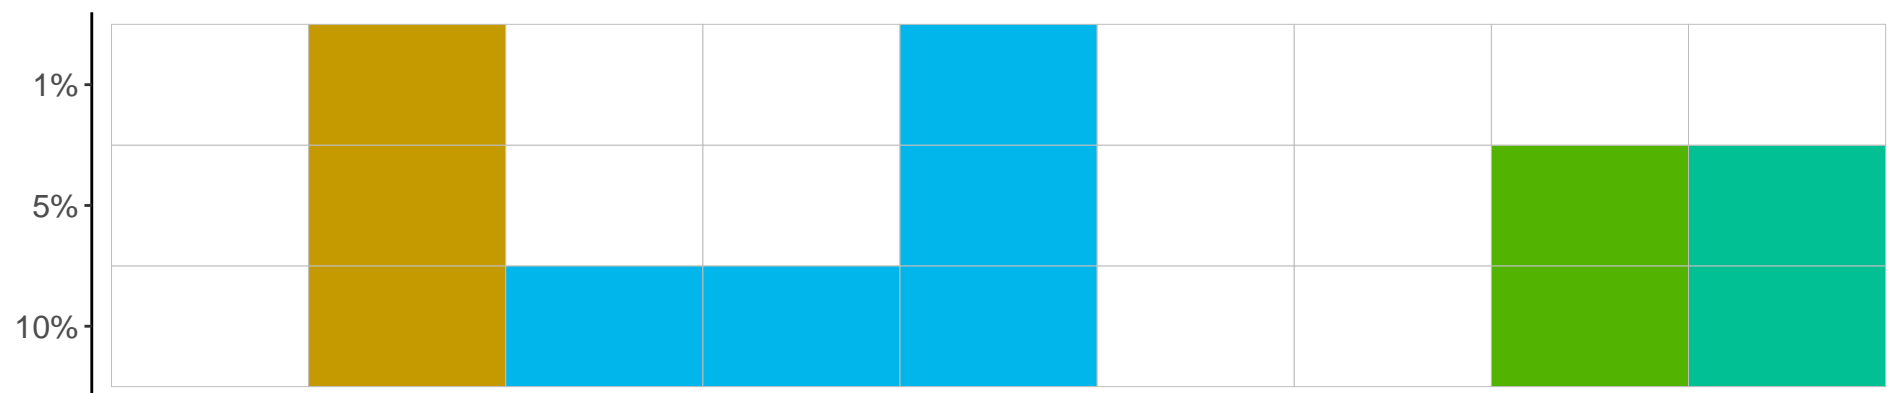

QTL F BLOIS\_2017\_OPT

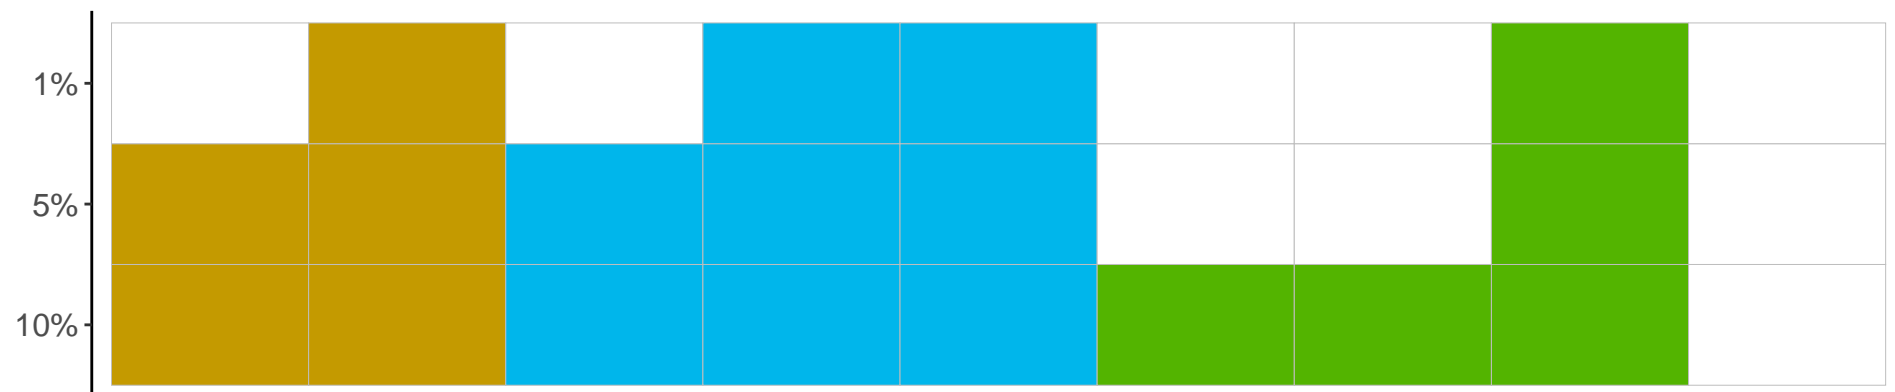

QTL H BLOIS\_2017\_OPT

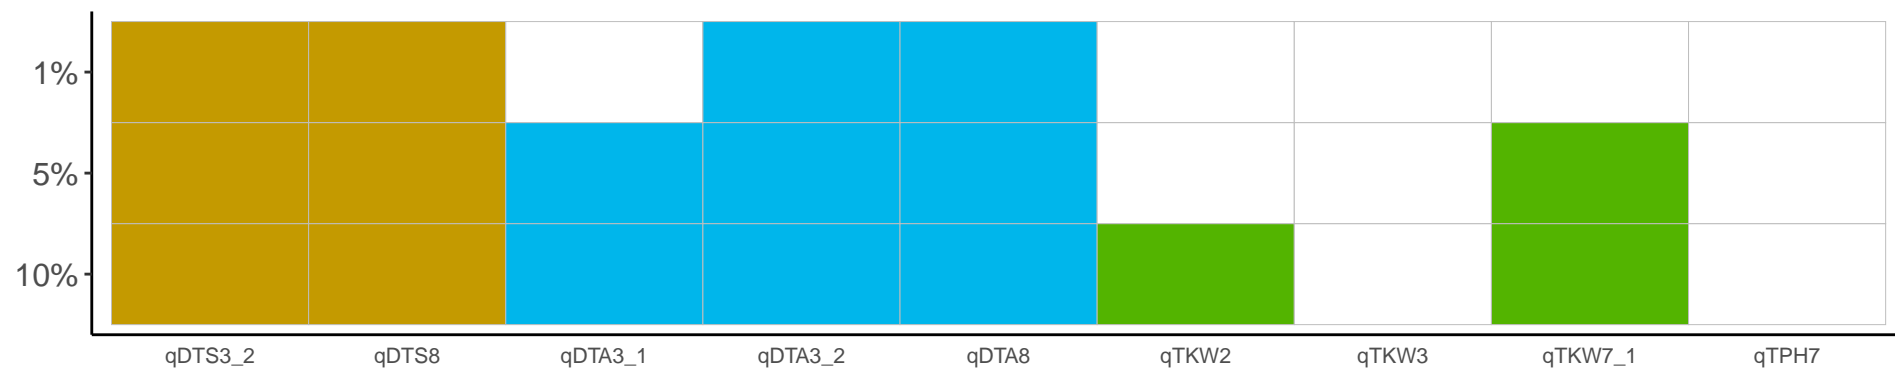

Individual Environment-QTL

Phenotype

|                                                                 |                                                      |                                                             |                                                 |
|-----------------------------------------------------------------|------------------------------------------------------|-------------------------------------------------------------|-------------------------------------------------|
| <span style="color: yellow;">■</span> Anthesis-Silking Interval | <span style="color: orange;">■</span> Grain Yield    | <span style="color: green;">■</span> Days to Anthesis       | <span style="color: red;">■</span> Plant Height |
| <span style="color: yellow;">■</span> Days to Silking           | <span style="color: orange;">■</span> Grain Moisture | <span style="color: green;">■</span> Thousand Kernel Weight |                                                 |

GWAS SNP GRANEROS\_2015\_OPT

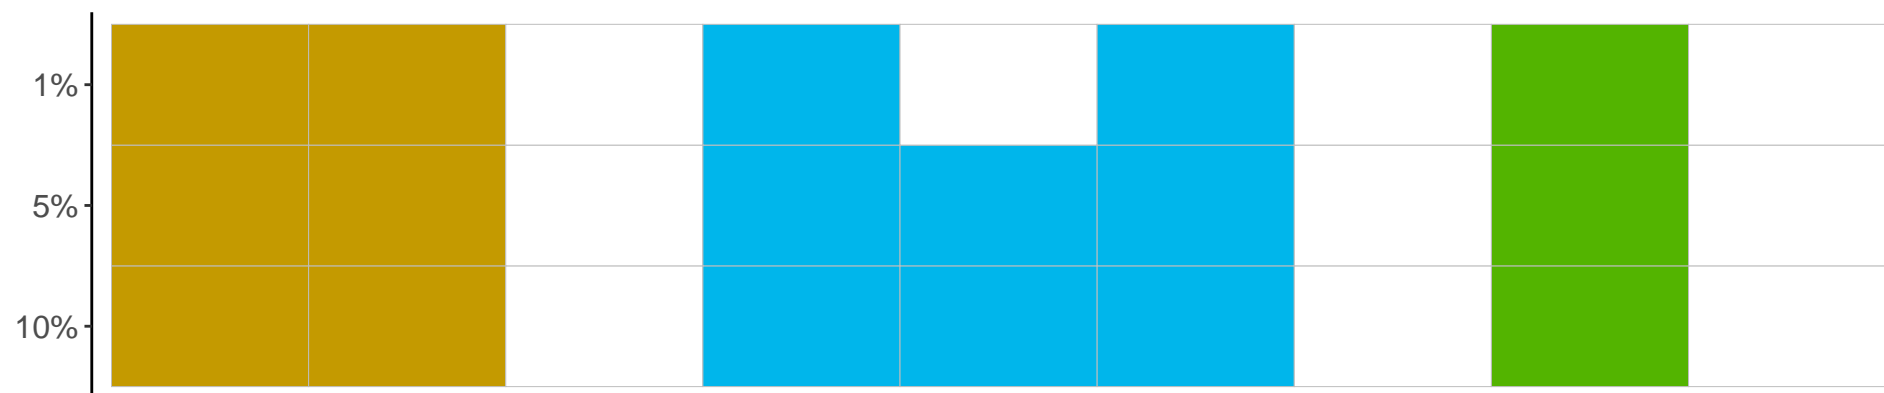

QTL F GRANEROS\_2015\_OPT

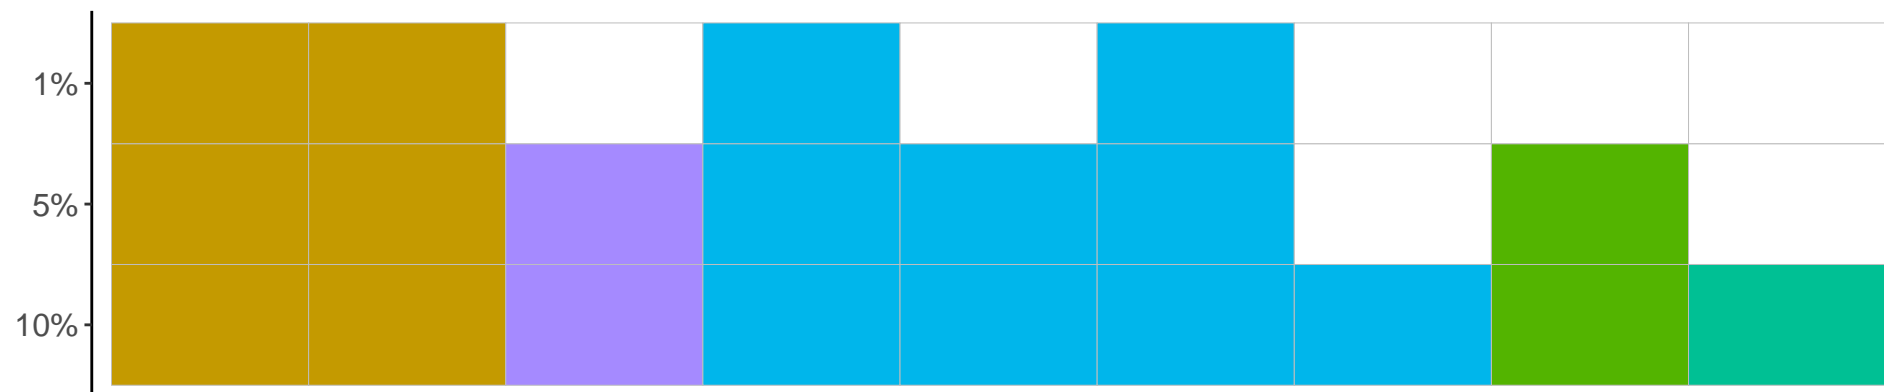

QTL H GRANEROS\_2015\_OPT

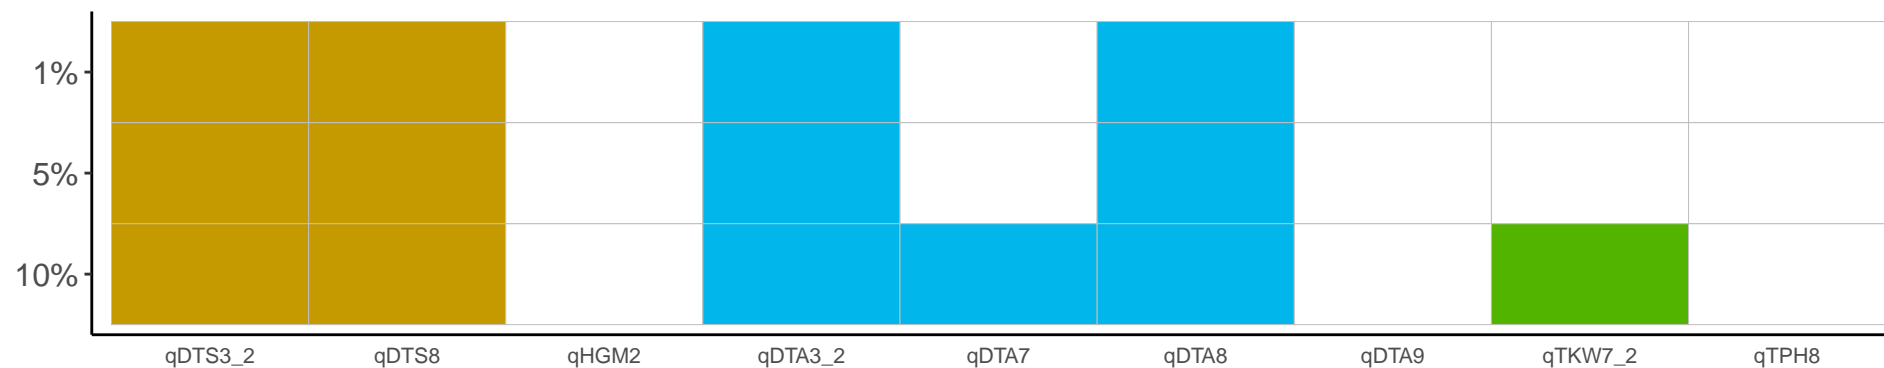

Individual Environment-QTL

Phenotype

|                                                              |                                                      |                                                             |                                                  |
|--------------------------------------------------------------|------------------------------------------------------|-------------------------------------------------------------|--------------------------------------------------|
| <span style="color: red;">■</span> Anthesis-Silking Interval | <span style="color: pink;">■</span> Grain Yield      | <span style="color: blue;">■</span> Days to Anthesis        | <span style="color: teal;">■</span> Plant Height |
| <span style="color: yellow;">■</span> Days to Silking        | <span style="color: purple;">■</span> Grain Moisture | <span style="color: green;">■</span> Thousand Kernel Weight |                                                  |

GWAS SNP NERAC\_2016\_WD

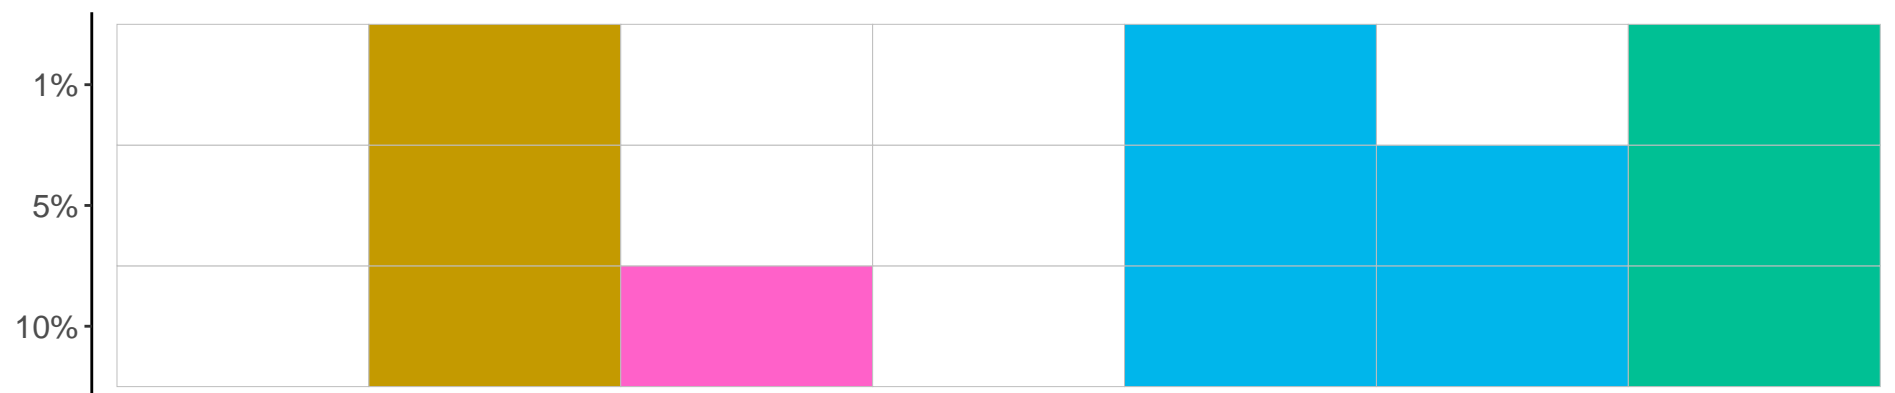

QTL F NERAC\_2016\_WD

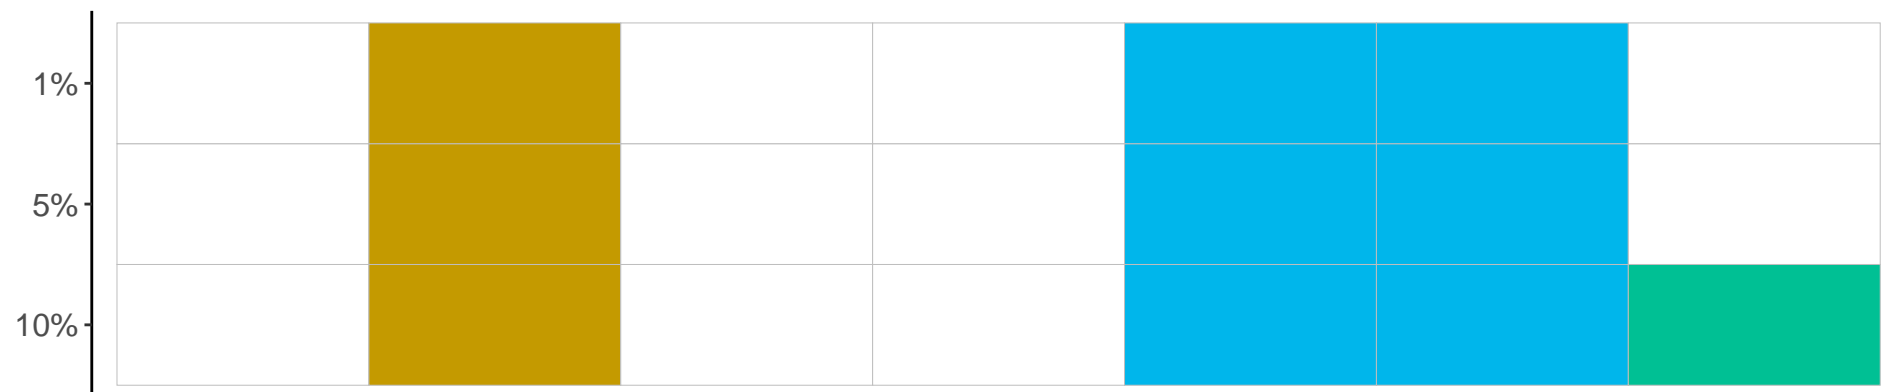

QTL H NERAC\_2016\_WD

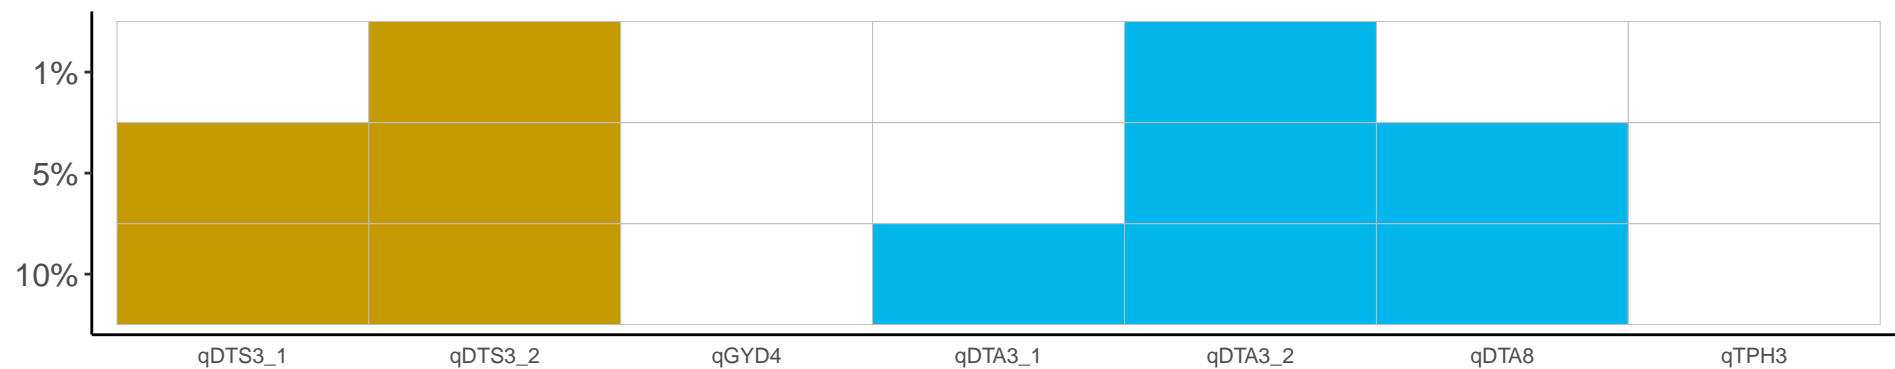

Individual Environment-QTL

Phenotype

|                                                                 |                                                      |                                                             |                                                   |
|-----------------------------------------------------------------|------------------------------------------------------|-------------------------------------------------------------|---------------------------------------------------|
| <span style="color: yellow;">■</span> Anthesis-Silking Interval | <span style="color: pink;">■</span> Grain Yield      | <span style="color: blue;">■</span> Days to Anthesis        | <span style="color: green;">■</span> Plant Height |
| <span style="color: yellow;">■</span> Days to Silking           | <span style="color: purple;">■</span> Grain Moisture | <span style="color: green;">■</span> Thousand Kernel Weight |                                                   |

GWAS SNP STPAUL\_2017\_WD

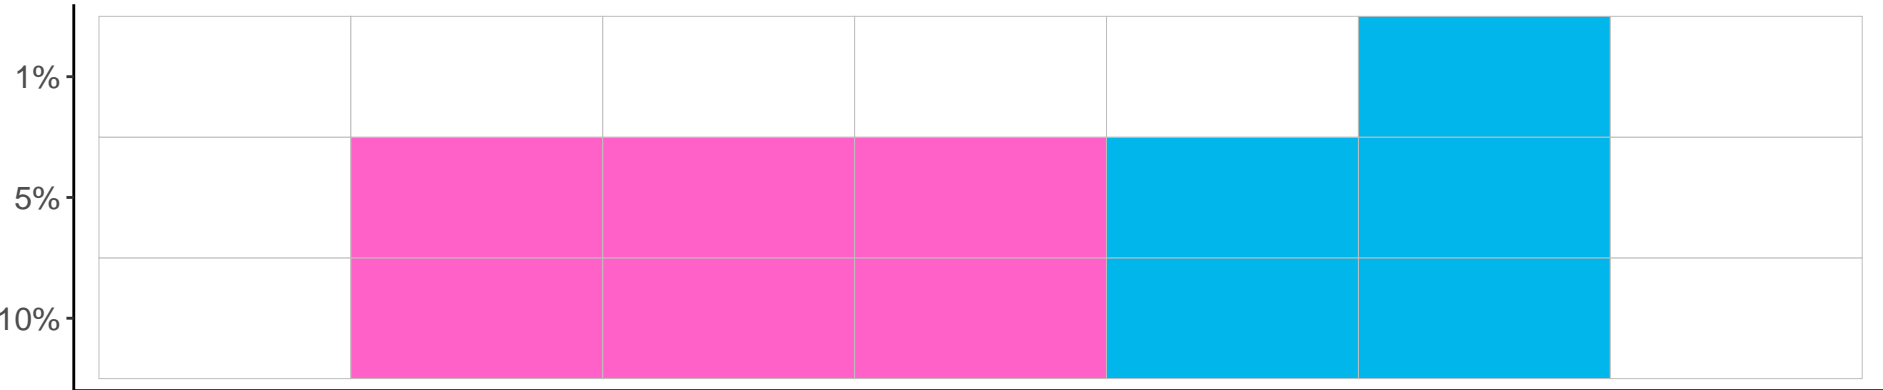

QTL F STPAUL\_2017\_WD

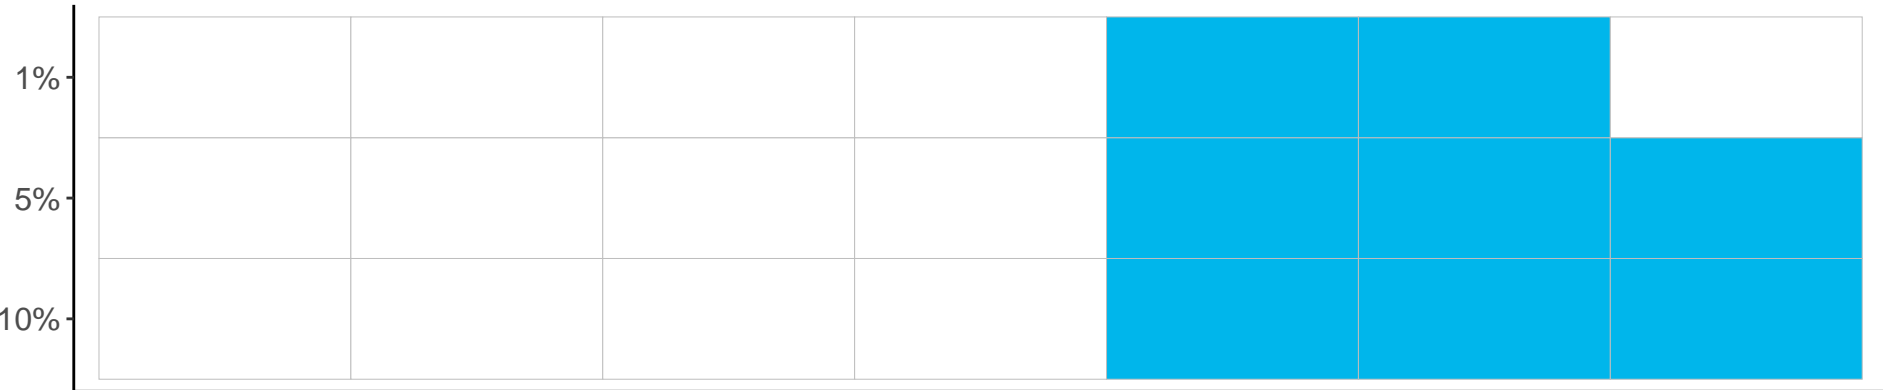

QTL H STPAUL\_2017\_WD

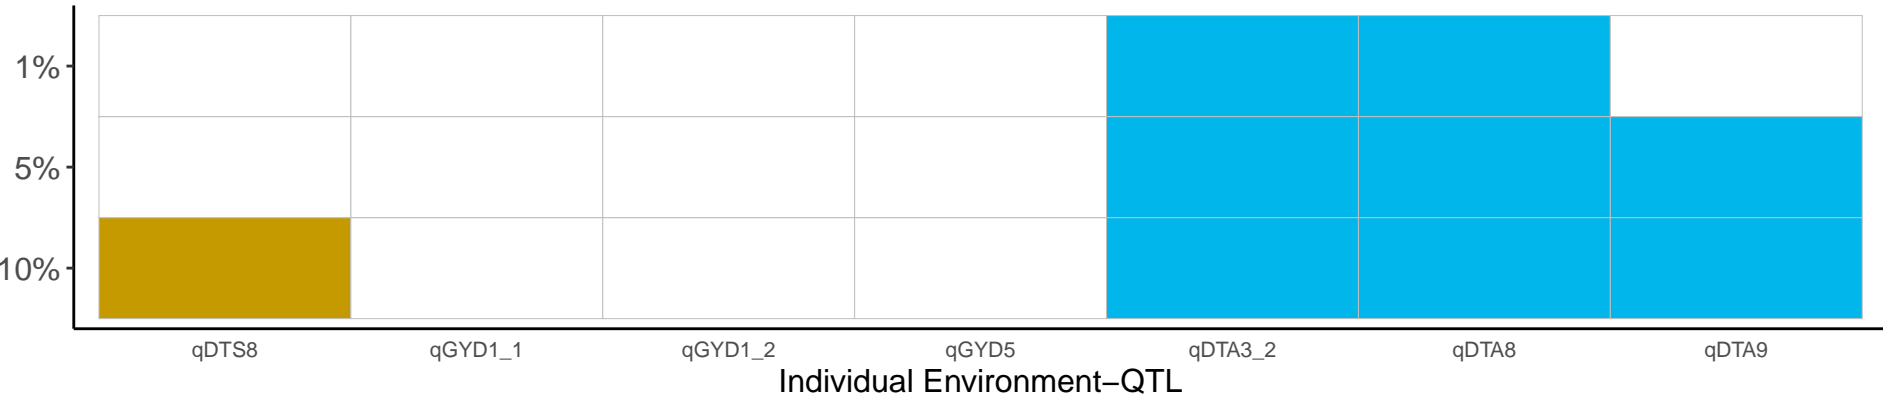

Phenotype

|                                                                                                               |                                                                                                    |                                                                                                              |                                                                                                    |
|---------------------------------------------------------------------------------------------------------------|----------------------------------------------------------------------------------------------------|--------------------------------------------------------------------------------------------------------------|----------------------------------------------------------------------------------------------------|
|  Anthesis–Silking Interval |  Grain Yield    |  Days to Anthesis       |  Plant Height |
|  Days to Silking           |  Grain Moisture |  Thousand Kernel Weight |                                                                                                    |

GWAS SNP SZEGED\_2017\_OPT

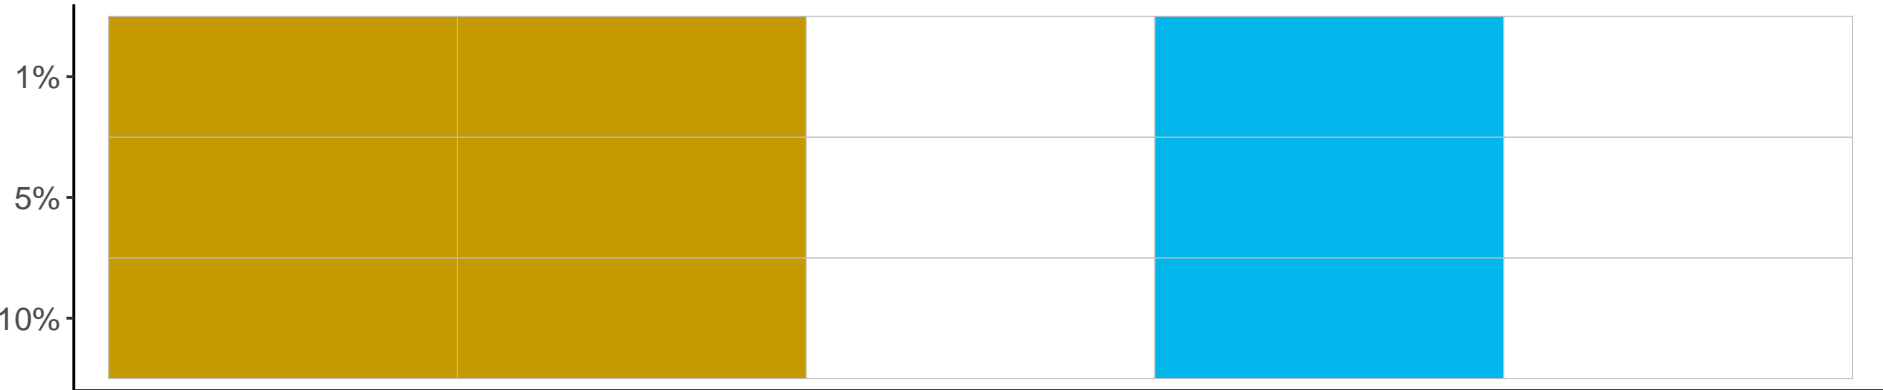

QTL F SZEGED\_2017\_OPT

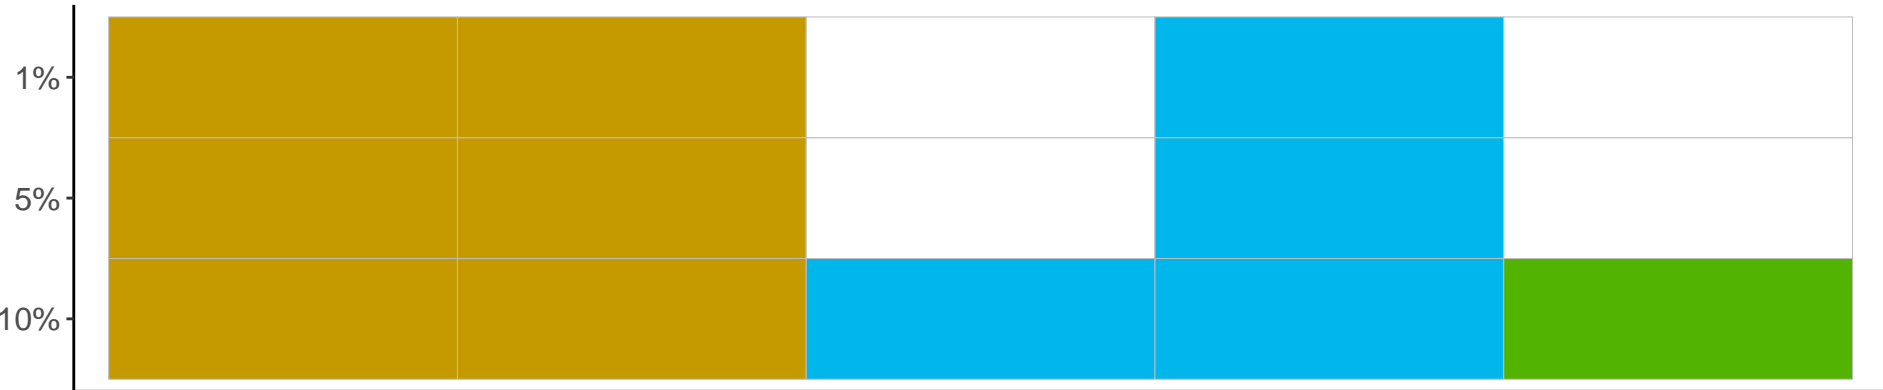

QTL H SZEGED\_2017\_OPT

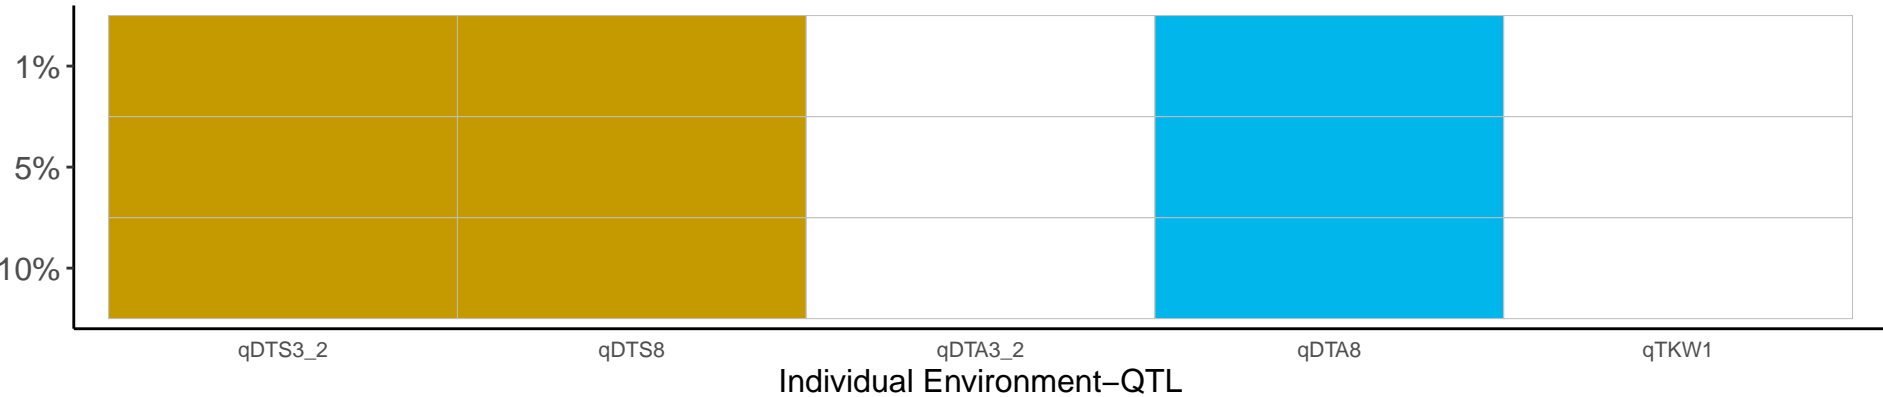

Phenotype

|                 |                  |                        |
|-----------------|------------------|------------------------|
| Days to Silking | Days to Anthesis | Thousand Kernel Weight |
| Grain Yield     | Grain Moisture   | Plant Height           |
