# Supplementary material
Source: publisher figshare collection journal article supplement (https://gsajournals.figshare.com/articles/dataset/_/14903283)
Supplement: Supplementary file 1 [file 1]

## Sheet: Biogemma_QTL
Phenotype	Environment	Method	Chromosome	ID	1P_Sig	10P_Sig_Only	highest_SNP	left_bound_snp	left_bound_bp	right_bound_bp	right_bound_snp	size_bp	left_bound_cM	right_bound_cM	size_cM
female_flowering_d6	BLUP	600K_SNP	3	qDTS3_2	T	F	AX-91383809	AX-90830370	141622242	161296968	AX-90835099	19674726	67.9607	76.1669	8.20616
female_flowering_d6	BLUP	600K_SNP	8	qDTS8	T	F	AX-91100991	AX-91423057	120341014	151224199	AX-91409417	30883185	63.04	75.44	12.4
female_flowering_d6	BLUP	Founder_probs	3	qDTS3_2	T	F	AX-90834914	AX-90834820	160273248	161420983	AX-90835152	1147735	75.1052	76.296	1.19081
female_flowering_d6	BLUP	Founder_probs	8	qDTS8	T	F	AX-91102858	AX-91768118	126077002	150520256	PZE-108089103	24443254	65.99	74.79	8.8
female_flowering_d6	BLUP	Founder_probs	9	qDTS9	T	F	AX-91146185	AX-91145948	118060423	121725096	PZE-109074231	3664673	62.86	64.98	2.12
female_flowering_d6	BLUP	Haplotype_probs		qDTS3_1	F	T	AX-90796878	AX-90796866	10774922	11444207	AX-90581880	669285	NA	NA	NA
female_flowering_d6	BLUP	Haplotype_probs	3	qDTS3_2	T	F	AX-91583302	AX-90833811	155852367	163307287	AX-90835132	5560406	72.6334	76.2873	3.6538
female_flowering_d6	BLUP	Haplotype_probs	8	qDTS8	T	F	AX-91101099	AX-91100271	127378541	149437688	AX-90618088	23579191	65.67	73.75	8.08
female_flowering_d6	BLUP	Haplotype_probs	9	qDTS9	F	F	AX-91146084	AX-91145835	114817909	124763331	AX-91388171	3906333	62.62	64.93	2.31
female_flowering_d6	BLOIS_2014_OPT	600K_SNP	3	qDTS3_2	T	F	AX-91583310	AX-91579932	140531962	163216283	AX-90835558	22684321	67.7361	78.0083	10.2722
female_flowering_d6	BLOIS_2014_OPT	600K_SNP	8	qDTS8	T	F	AX-91100974	PZE-108070380	126885610	135966917	AX-91769750	9081307	66.44	68.83	2.39
female_flowering_d6	BLOIS_2014_OPT	Founder_probs	3	qDTS3_2	T	F	AX-90834914	PZE-103093413	155999962	161420983	AX-90835152	5421021	72.7013	76.296	3.59473
female_flowering_d6	BLOIS_2014_OPT	Founder_probs	8	qDTS8	T	F	PZA01038.1	AX-91768118	126077002	136360604	AX-91769846	10442817	65.99	69.06	3.07
female_flowering_d6	BLOIS_2014_OPT	Founder_probs	9	qDTS9	T	F	AX-91146185	AX-91145110	116613531	124089472	AX-91147527	7543524	61.75	65.54	3.79
female_flowering_d6	BLOIS_2014_OPT	Haplotype_probs	3	qDTS3_2	T	F	AX-90834861	AX-91583168	159604235	161412773	AX-90835132	1808538	74.5579	76.2873	1.72935
female_flowering_d6	BLOIS_2014_OPT	Haplotype_probs	8	qDTS8	T	F	AX-91442756	PZA01038.1	128420026	136008951	AX-91769824	7864716	67.24	68.96	1.72
female_flowering_d6	BLOIS_2014_OPT	Haplotype_probs	9	qDTS9	F	F	AX-91146084	AX-91144547	114347350	124860954	AX-91801224	10513604	61.04	65.96	4.92
female_flowering_d6	BLOIS_2017_OPT	600K_SNP	8	qDTS8	T	F	PZE-108089600	AX-91433657	145540028	151224199	AX-91409417	5684171	71.72	75.44	3.72
female_flowering_d6	BLOIS_2017_OPT	Founder_probs	3	qDTS3_2	F	F	AX-90834914	PZE-103084819	141032560	163307287	AX-91583810	21974189	67.9013	78.0833	10.182
female_flowering_d6	BLOIS_2017_OPT	Founder_probs	8	qDTS8	T	F	AX-91771730	AX-91771630	146136754	150346508	AX-91106902	4209754	72.03	74.62	2.59
female_flowering_d6	BLOIS_2017_OPT	Haplotype_probs	3	qDTS3_2	T	F	AX-90834938	AX-90829257	141153604	163307287	AX-90835684	26471666	66.9	78.4623	11.5623
female_flowering_d6	BLOIS_2017_OPT	Haplotype_probs	8	qDTS8	T	F	AX-91106190	AX-91771473	145263274	149986813	AX-91772362	4723539	71.62	74.4	2.78
female_flowering_d6	GRANEROS_2015_OPT	600K_SNP	3	qDTS3_2	T	F	AX-90835099	PZB00228.4	156128886	161296968	AX-90835099	5168082	72.7606	76.1669	3.40635
female_flowering_d6	GRANEROS_2015_OPT	600K_SNP	8	qDTS8	T	F	AX-91099031	AX-91098776	119781443	137874699	AX-91446786	18093256	62.69	69.58	6.89
female_flowering_d6	GRANEROS_2015_OPT	Founder_probs	3	qDTS3_2	T	F	AX-90835093	SYN3043	153465886	163307287	AX-91583810	9919050	71.5404	78.0833	6.54289
female_flowering_d6	GRANEROS_2015_OPT	Founder_probs	8	qDTS8	T	F	AX-91099134	AX-91098748	119704031	136360604	AX-91769846	16815788	62.65	69.06	6.41
female_flowering_d6	GRANEROS_2015_OPT	Haplotype_probs	3	qDTS3_2	T	F	AX-90835021	AX-90832587	152190251	161435844	AX-91583812	12332073	70.4806	78.0725	7.59193
female_flowering_d6	GRANEROS_2015_OPT	Haplotype_probs	8	qDTS8	T	F	AX-90590533	AX-91098679	119336430	136835221	PZE-108077298	17411623	62.53	69.19	6.66
female_flowering_d6	NERAC_2016_WD	600K_SNP	3	qDTS3_2	T	F	AX-90586701	AX-91583257	160214408	168342144	AX-90590781	8127736	75.0342	80.4125	5.37829
female_flowering_d6	NERAC_2016_WD	Founder_probs	3	qDTS3_2	T	F	AX-90834914	AX-90834820	160273248	161420983	AX-90835152	1147735	75.1052	76.296	1.19081
female_flowering_d6	NERAC_2016_WD	Haplotype_probs	3	qDTS3_1	F	F	AX-90796871	AX-90796866	10774922	11444207	AX-91427439	669516	41.7172	43.0881	1.37088
female_flowering_d6	NERAC_2016_WD	Haplotype_probs	3	qDTS3_2	T	F	AX-91583302	AX-90834861	160392864	161237016	AX-90835132	1135051	75.1106	76.2873	1.17663
female_flowering_d6	STPAUL_2017_WD	Haplotype_probs		qDTS8	F	F	AX-91101099	AX-91100271	125337514	151006728	AX-91107084	25669214	NA	NA	NA
female_flowering_d6	SZEGED_2017_OPT	600K_SNP	3	qDTS3_2	T	T	AX-91383809	AX-90830370	141622242	163294109	AX-90835581	21671867	67.9607	78.0724	10.1116
female_flowering_d6	SZEGED_2017_OPT	600K_SNP	8	qDTS8	T	F	AX-91100991	PZE-108070380	126885610	151875955	AX-91107297	24990345	66.44	75.98	9.54
female_flowering_d6	SZEGED_2017_OPT	Founder_probs	3	qDTS3_2	T	F	AX-90834914	AX-91580002	141032560	161420983	AX-90835152	20388423	67.8395	76.296	8.45654
female_flowering_d6	SZEGED_2017_OPT	Founder_probs	8	qDTS8	T	F	AX-91106686	AX-91100867	127992851	150866243	PZE-108089479	22873392	67.07	75.12	8.05
female_flowering_d6	SZEGED_2017_OPT	Haplotype_probs	3	qDTS3_2	T	F	PZE-103098507	AX-91580002	137673677	161412773	AX-90835132	20380213	67.8395	76.2873	8.44775
female_flowering_d6	SZEGED_2017_OPT	Haplotype_probs	8	qDTS8	T	F	AX-91106203	AX-91100761	127378541	151006728	AX-91107084	23628187	66.71	75.25	8.54
grain_yield_15	BLUP	600K_SNP		qGYD6	F	T	PZA03063.21	AX-90984689	30749664	61643265	AX-90604007	30893601	NA	NA	NA
grain_yield_15	BLUP	Founder_probs		qGYD6	F	T	AX-91689835	AX-90983800	26946128	50840937	AX-90989672	23894809	NA	NA	NA
grain_yield_15	NERAC_2016_WD	600K_SNP		qGYD4	F	T	AX-91851755	AX-91628881	174745869	174758681	PUT-163a-60359442-2879	12812	NA	NA	NA
grain_yield_15	STPAUL_2017_WD	600K_SNP	1	qGYD1_1	F	F	AX-91465366	AX-91204402	63241728	71780754	AX-91466547	8539026	77.4763	80.8652	3.38892
grain_yield_15	STPAUL_2017_WD	600K_SNP	1	qGYD1_2	F	F	AX-91485244	AX-91485244	173166714	173401292	AX-91439687	234578	98.0751	98.152	0.0769044
grain_yield_15	STPAUL_2017_WD	600K_SNP	5	qGYD5	F	F	PZE-105031901	PZE-105031901	18196101	19207809	AX-90925743	1011708	51.0817	51.7794	0.697707
harvest_grain_moisture	BLUP	600K_SNP	3	qHGM3_2	T	F	AX-91580498	AX-90828340	133870185	157564855	AX-91582791	23694670	66.2141	73.3379	7.12386
harvest_grain_moisture	BLUP	Founder_probs	3	qHGM3_1	F	F	AX-90799820	AX-91555851	12160355	31807621	AX-91559451	19647266	44.0651	59.5536	15.4885
harvest_grain_moisture	BLUP	Founder_probs	3	qHGM3_2	F	F	PZE-103084819	PZE-103077620	102059129	163726450	AX-90835684	34556500	65.5418	78.4623	12.9204
harvest_grain_moisture	BLUP	Haplotype_probs		qHGM3_1	F	T	AX-90800363	AX-91555649	10774951	54007246	AX-91563577	43232295	NA	NA	NA
harvest_grain_moisture	BLUP	Haplotype_probs	3	qHGM3_2	F	F	AX-91579562	AX-90828150	135632376	157563421	AX-90603362	24932564	66.0893	73.4662	7.37693
harvest_grain_moisture	BLOIS_2014_OPT	600K_SNP	3	qHGM3_1	F	F	AX-91556625	AX-90798196	16215776	34201739	AX-91411221	17985963	49.2022	59.837	10.6348
harvest_grain_moisture	GRANEROS_2015_OPT	Founder_probs	2	qHGM2	F	F	AX-90784366	AX-91547020	207356837	210899385	AX-90784583	3542548	110.634	112.635	2.00102
male_flowering_d6	BLUP	600K_SNP		qDTA3_1	F	T	AX-90796860	AX-90796575	9576867	20032599	AX-90799222	10455732	NA	NA	NA
male_flowering_d6	BLUP	600K_SNP	3	qDTA3_2	T	F	AX-90835099	PZB00228.4	156128886	161296968	AX-90835099	5168082	72.7606	76.1669	3.40635
male_flowering_d6	BLUP	600K_SNP	8	qDTA8	T	F	AX-91100991	AX-91768187	126570432	151224199	AX-91409417	24653767	66.25	75.44	9.19
male_flowering_d6	BLUP	Founder_probs		qDTA3_1	F	T	SYN12568	AX-90796519	9468968	11692672	AX-90797067	2223704	NA	NA	NA
male_flowering_d6	BLUP	Founder_probs	3	qDTA3_2	T	F	AX-90834914	PZE-103093413	155999962	161420983	AX-90835152	5421021	72.7013	76.296	3.59473
male_flowering_d6	BLUP	Founder_probs	8	qDTA8	T	F	AX-91102858	AX-91100615	126077002	150520256	PZE-108089103	23609981	66.45	74.79	8.34
male_flowering_d6	BLUP	Founder_probs	9	qDTA9	F	F	AX-91146091	AX-91798808	111962632	121725096	PZE-109074231	9762464	60.37	64.98	4.61
male_flowering_d6	BLUP	Haplotype_probs	3	qDTA3_1	F	F	AX-90796949	AX-91555597	10774922	11444207	AX-91427439	898923	41.2892	43.0881	1.79891
male_flowering_d6	BLUP	Haplotype_probs	3	qDTA3_2	T	F	AX-90835021	AX-90833811	155852367	161412773	AX-90835132	5560406	72.6334	76.2873	3.6538
male_flowering_d6	BLUP	Haplotype_probs	8	qDTA8	T	F	AX-91102778	AX-91100271	125337514	149986813	AX-91772362	24649299	65.67	74.4	8.73
male_flowering_d6	BLUP	Haplotype_probs		qDTA9	F	T	AX-91146091	AX-91143763	111015458	150056511	AX-91805530	39041053	NA	NA	NA
male_flowering_d6	BLOIS_2014_OPT	600K_SNP	3	qDTA3_2	T	F	AX-91583310	PZB00228.4	156128886	161296968	AX-90835099	5168082	72.7606	76.1669	3.40635
male_flowering_d6	BLOIS_2014_OPT	600K_SNP	8	qDTA8	T	F	AX-91446786	PZE-108070380	126885610	137874699	AX-91446786	10989089	66.44	69.58	3.14
male_flowering_d6	BLOIS_2014_OPT	Founder_probs	3	qDTA3_2	T	F	AX-90834556	PZE-103093413	155999962	161420983	AX-90835152	5421021	72.7013	76.296	3.59473
male_flowering_d6	BLOIS_2014_OPT	Founder_probs	8	qDTA8	T	F	PZA01038.1	AX-91100615	126910275	137947309	AX-91770024	10509393	66.45	69.4	2.95
male_flowering_d6	BLOIS_2014_OPT	Founder_probs		qDTA9	F	T	AX-91146185	AX-91798624	111015021	120670613	AX-91146545	9655592	NA	NA	NA
male_flowering_d6	BLOIS_2014_OPT	Haplotype_probs	3	qDTA3_2	T	F	AX-90834861	AX-90833811	157175061	161412773	AX-90835132	5560406	72.6334	76.2873	3.6538
male_flowering_d6	BLOIS_2014_OPT	Haplotype_probs	8	qDTA8	T	F	AX-91101099	PZA01038.1	128420026	137415945	AX-91419404	8995919	67.24	69.4	2.16
male_flowering_d6	BLOIS_2017_OPT	600K_SNP		qDTA3_1	F	T	AX-90796860	AX-90597117	9977725	54966584	AX-91563770	44988859	NA	NA	NA
male_flowering_d6	BLOIS_2017_OPT	600K_SNP		qDTA3_2	F	T	AX-91583281	PZE-103077786	129315698	179001343	AX-91586504	49685645	NA	NA	NA
male_flowering_d6	BLOIS_2017_OPT	600K_SNP	8	qDTA8	T	F	AX-91106658	AX-91768187	126570432	151224199	AX-91409417	24653767	66.25	75.44	9.19
male_flowering_d6	BLOIS_2017_OPT	Founder_probs	3	qDTA3_1	F	F	AX-90796752	AX-90796519	9468968	11692672	AX-90797067	2223704	39.2303	43.4665	4.23622
male_flowering_d6	BLOIS_2017_OPT	Founder_probs	3	qDTA3_2	T	F	AX-90834914	PZE-103093413	155999962	163307287	AX-91583810	7307325	72.7013	78.0833	5.38196
male_flowering_d6	BLOIS_2017_OPT	Founder_probs	8	qDTA8	T	F	AX-91106569	AX-91100761	127378541	150866243	PZE-108089479	23487702	66.71	75.12	8.41
male_flowering_d6	BLOIS_2017_OPT	Haplotype_probs	3	qDTA3_1	F	F	AX-91555649	PZE-103018067	9812175	11444207	AX-91427439	1632263	39.9054	43.0881	3.1827
male_flowering_d6	BLOIS_2017_OPT	Haplotype_probs	3	qDTA3_2	T	F	AX-91583302	PZE-103091354	157175061	161412773	AX-91583812	11104001	71.0103	78.0725	7.06222
male_flowering_d6	BLOIS_2017_OPT	Haplotype_probs	8	qDTA8	T	F	AX-91106190	AX-91100271	126910275	150924566	AX-91772535	25587052	65.67	75.17	9.5
male_flowering_d6	GRANEROS_2015_OPT	600K_SNP	3	qDTA3_2	T	F	AX-90835099	PZB00228.4	156128886	161412773	AX-90835132	5283887	72.7606	76.2873	3.52668
male_flowering_d6	GRANEROS_2015_OPT	600K_SNP	7	qDTA7	F	F	AX-91026083	AX-91026001	15490475	20506774	AX-90629547	5016299	42.5791	45.5351	2.956
male_flowering_d6	GRANEROS_2015_OPT	600K_SNP	8	qDTA8	T	F	AX-91103301	AX-91423057	120341014	146112050	AX-90613362	25771036	63.04	72.01	8.97
male_flowering_d6	GRANEROS_2015_OPT	Founder_probs	3	qDTA3_2	T	F	AX-90835093	PZE-103093413	155999962	163307287	AX-91583810	7307325	72.7013	78.0833	5.38196
male_flowering_d6	GRANEROS_2015_OPT	Founder_probs	7	qDTA7	F	F	AX-91715233	AX-91024553	9361661	17862397	AX-91715848	8500736	33.7745	44.6463	10.8718
male_flowering_d6	GRANEROS_2015_OPT	Founder_probs	8	qDTA8	T	F	AX-91102858	AX-90622557	120340882	150520256	AX-91772430	30071056	63.04	74.69	11.65
male_flowering_d6	GRANEROS_2015_OPT	Founder_probs		qDTA9	F	T	AX-91145836	AX-91144556	114343703	118040833	AX-91145936	3697130	NA	NA	NA
male_flowering_d6	GRANEROS_2015_OPT	Haplotype_probs	3	qDTA3_2	T	F	AX-90835021	PZE-103091354	159141941	161486117	AX-91583812	11104001	71.0103	78.0725	7.06222
male_flowering_d6	GRANEROS_2015_OPT	Haplotype_probs		qDTA7	F	T	AX-91715233	AX-91024553	9361661	17937993	AX-90599761	8576332	NA	NA	NA
male_flowering_d6	GRANEROS_2015_OPT	Haplotype_probs	8	qDTA8	T	F	AX-91102778	AX-91098778	119775957	149437688	AX-91106662	29661731	62.69	74.05	11.36
male_flowering_d6	NERAC_2016_WD	600K_SNP	3	qDTA3_2	T	F	AX-90586701	AX-91199339	153057659	163216372	AX-91215813	10158713	71.3879	78.0083	6.6204
male_flowering_d6	NERAC_2016_WD	600K_SNP	8	qDTA8	F	F	AX-91767208	AX-91423057	120341014	151891941	PZE-108090426	31550927	63.04	75.99	12.95
male_flowering_d6	NERAC_2016_WD	Founder_probs	3	qDTA3_2	T	F	AX-90834914	AX-90834479	158563749	161475295	PZE-103099719	2911546	73.8251	76.3541	2.52906
male_flowering_d6	NERAC_2016_WD	Founder_probs	8	qDTA8	T	F	AX-91772402	AX-91098748	119704031	150866243	PZE-108089479	31162212	62.65	75.12	12.47
male_flowering_d6	NERAC_2016_WD	Haplotype_probs		qDTA3_1	F	T	AX-90796878	AX-90796866	10774922	11444207	AX-90581880	669285	NA	NA	NA
male_flowering_d6	NERAC_2016_WD	Haplotype_probs	3	qDTA3_2	T	F	AX-91583302	AX-90834861	160207590	161435844	AX-90835132	1135051	75.1106	76.2873	1.17663
male_flowering_d6	NERAC_2016_WD	Haplotype_probs	8	qDTA8	F	F	PZE-108088314	AX-91766974	119100585	151722943	PZE-108090567	33008841	62.4	76.17	13.77
male_flowering_d6	STPAUL_2017_WD	600K_SNP	3	qDTA3_2	F	F	PZB00228.4	AX-91576767	123607128	161296968	AX-90835099	37689840	64.473	76.1669	11.6939
male_flowering_d6	STPAUL_2017_WD	600K_SNP	8	qDTA8	T	F	PZE-108070380	AX-91768165	126413801	151224199	AX-91409417	24810398	66.17	75.44	9.27
male_flowering_d6	STPAUL_2017_WD	Founder_probs	3	qDTA3_2	T	F	PZE-103093413	PZE-103093413	155999962	161475295	PZE-103099719	5475333	72.7013	76.3541	3.65282
male_flowering_d6	STPAUL_2017_WD	Founder_probs	8	qDTA8	T	F	AX-91771730	AX-91768118	126077002	150866243	PZE-108089479	24789241	65.99	75.12	9.13
male_flowering_d6	STPAUL_2017_WD	Founder_probs	9	qDTA9	F	F	AX-91145110	AX-91798808	111962632	124483594	AX-91147612	12561972	60.37	65.73	5.36
male_flowering_d6	STPAUL_2017_WD	Haplotype_probs	3	qDTA3_2	T	F	AX-90834152	AX-90833811	155852367	161481215	AX-91848804	5628848	72.6334	76.3604	3.727
male_flowering_d6	STPAUL_2017_WD	Haplotype_probs	8	qDTA8	T	F	AX-91101099	AX-91100615	126910275	149986813	AX-91772362	23076538	66.45	74.4	7.95
male_flowering_d6	STPAUL_2017_WD	Haplotype_probs	9	qDTA9	F	F	AX-91799201	AX-91798808	111962632	124460017	AX-91147601	12497385	60.37	65.69	5.32
male_flowering_d6	SZEGED_2017_OPT	600K_SNP	8	qDTA8	T	F	AX-91103348	PZE-108070380	126885610	151891941	PZE-108090426	25006331	66.44	75.99	9.55
male_flowering_d6	SZEGED_2017_OPT	Founder_probs		qDTA3_2	F	T	AX-90834914	AX-91580002	141032560	161238626	AX-91583440	20206066	NA	NA	NA
male_flowering_d6	SZEGED_2017_OPT	Founder_probs	8	qDTA8	T	F	AX-91771730	AX-91102858	142750019	152574587	AX-91772834	17044529	68.65	76.64	7.99
male_flowering_d6	SZEGED_2017_OPT	Haplotype_probs	8	qDTA8	T	F	AX-91106203	PZA00531.1	128742959	151006728	AX-91107084	22263769	67.29	75.25	7.96
tkw_15	BLUP	600K_SNP	5	qTKW5	F	F	AX-90920941	AX-90920928	1721566	1723167	AX-90920943	1601	4.71666	4.72128	0.00462042
tkw_15	BLUP	600K_SNP		qTKW9	F	T	AX-91120326	AX-91781069	15122815	18089022	AX-91120497	2966207	NA	NA	NA
tkw_15	BLUP	Haplotype_probs		qTKW9	F	T	AX-91120219	AX-91119877	15656271	18533708	PZE-109018226	2877437	NA	NA	NA
tkw_15	BLOIS_2017_OPT	600K_SNP	7	qTKW7_1	F	F	AX-91025554	AX-91714618	10938777	27939165	SYN20711	17000388	36.5351	47.9162	11.3811
tkw_15	BLOIS_2017_OPT	Founder_probs		qTKW2	F	T	PZE-102038547	AX-91193684	17689185	20386177	AX-91512802	2696992	NA	NA	NA
tkw_15	BLOIS_2017_OPT	Founder_probs		qTKW3	F	T	AX-90797209	AX-91555851	12160355	12556111	AX-90797294	395756	NA	NA	NA
tkw_15	BLOIS_2017_OPT	Founder_probs	7	qTKW7_1	T	F	SYN16002	AX-91024968	10973468	25123799	AX-91716710	11727273	36.5952	46.5668	9.97162
tkw_15	BLOIS_2017_OPT	Haplotype_probs		qTKW2	F	T	AX-91513486	AX-90735130	19213370	28310359	AX-91514286	9096989	NA	NA	NA
tkw_15	BLOIS_2017_OPT	Haplotype_probs	7	qTKW7_1	F	F	AX-91715006	AX-91714621	10976246	27988953	AX-91042770	71866158	36.5266	50.175	13.6484
tkw_15	GRANEROS_2015_OPT	600K_SNP	7	qTKW7_2	T	F	AX-91734623	AX-91053077	124347596	124756367	AX-91734623	408771	59.0824	59.2491	0.16668
tkw_15	GRANEROS_2015_OPT	Founder_probs	7	qTKW7_2	F	F	AX-91053569	AX-91045824	95797065	131824096	AX-91055106	36027031	50.8031	63.4333	12.6302
tkw_15	GRANEROS_2015_OPT	Haplotype_probs		qTKW7_2	F	T	AX-91053569	PZE-107052949	107149522	131212353	AX-91420594	24062831	NA	NA	NA
tkw_15	SZEGED_2017_OPT	Founder_probs		qTKW1	F	T	PZE-101038176	SYN5764	11671250	26014128	AX-90656967	14342878	NA	NA	NA
total_plant_height	BLUP	600K_SNP		qTPH3	F	T	AX-91450032	AX-90829758	139282905	183874792	AX-91381673	44591887	NA	NA	NA
total_plant_height	BLUP	600K_SNP	7	qTPH7	T	F	PZB02215.4	AX-91024619	9548103	10085223	AX-91714501	537120	34.1099	35.0515	0.941586
total_plant_height	BLUP	Founder_probs		qTPH1	F	T	AX-91456262	AX-90653293	13053862	15379189	AX-91456268	2325327	NA	NA	NA
total_plant_height	BLUP	Founder_probs	7	qTPH7	T	F	AX-91024553	AX-91024473	8991474	10085337	AX-91024756	1093863	33.1553	35.0517	1.89642
total_plant_height	BLUP	Haplotype_probs		qTPH3	F	T	AX-91582354	AX-90832101	149051759	183807330	AX-90641479	34755571	NA	NA	NA
total_plant_height	BLUP	Haplotype_probs	7	qTPH7	F	F	PZE-107012564	AX-91024425	8979716	10085223	PZE-107013073	655535	33.1353	34.2812	1.14593
total_plant_height	BLOIS_2014_OPT	Founder_probs		qTPH6	F	T	AX-91700033	AX-91699918	105707110	106378416	PZE-106052536	671306	NA	NA	NA
total_plant_height	BLOIS_2017_OPT	600K_SNP	7	qTPH7	F	F	AX-91714501	AX-91024551	9378259	10085223	AX-91714501	706964	33.8015	35.0515	1.25003
total_plant_height	GRANEROS_2015_OPT	Founder_probs		qTPH8	F	T	AX-91111978	AX-91102763	135165296	168996496	AX-91775839	33831200	NA	NA	NA
total_plant_height	NERAC_2016_WD	600K_SNP	3	qTPH3	T	F	AX-90594684	AX-90836295	167424633	174758506	AX-91585763	7333873	79.9929	86.4306	6.43766
total_plant_height	NERAC_2016_WD	Founder_probs		qTPH3	F	T	PZE-103108199	PZE-103105057	168869189	171846046	AX-90837424	2976857	NA	NA	NA
asi	BLUP	600K_SNP		qASI10	F	T	AX-91829024	AX-91187500	116610226	123356331	AX-91189180	6746105	NA	NA	NA

## Sheet: SNPEffectSizes
EffectSize	SE	T-value	Allele	QTL_ID	PeakSNP	KeptSNP	Position	Method	FocalMethod
-5.20486	1.21936	-4.26852	0	female_flowering_d6_ALL_qDTS3_2	AX-91383809	AX-91383809	157563421	600K_SNP	600K_SNP
10.6043	2.64158	5.98473	1	female_flowering_d6_ALL_qDTS3_2	AX-91383809	AX-91383809	157563421	600K_SNP	600K_SNP
9.86279	1.68296	5.86038	0	female_flowering_d6_ALL_qDTS8	AX-91100991	AX-91100991	128360284	600K_SNP	600K_SNP
-6.74553	2.49192	-6.66486	1	female_flowering_d6_ALL_qDTS8	AX-91100991	AX-91100991	128360284	600K_SNP	600K_SNP
-1.31077	1.54269	-0.849662	0	female_flowering_d6_ALL_qDTS3_2	AX-90834914	AX-90834914	160426458	600K_SNP	Founder_probs
1.42	2.59224	1.05344	1	female_flowering_d6_ALL_qDTS3_2	AX-90834914	AX-90834914	160426458	600K_SNP	Founder_probs
11.2479	2.43814	4.6133	0	female_flowering_d6_ALL_qDTS8	PZA01038.1	PZA01038.1	128420026	600K_SNP	Founder_probs
-3.31611	2.94999	-4.93696	1	female_flowering_d6_ALL_qDTS8	PZA01038.1	PZA01038.1	128420026	600K_SNP	Founder_probs
1.97559	1.13376	1.74252	0	female_flowering_d6_ALL_qDTS9	AX-91146185	AX-91146185	119413544	600K_SNP	Founder_probs
-4.13933	2.70018	-2.26464	1	female_flowering_d6_ALL_qDTS9	AX-91146185	AX-91146185	119413544	600K_SNP	Founder_probs
-1.31077	1.54269	-0.849662	0	female_flowering_d6_ALL_qDTS3_2	AX-90834914	AX-90834914	160426458	600K_SNP	Haplotype_probs
1.42	2.59224	1.05344	1	female_flowering_d6_ALL_qDTS3_2	AX-90834914	AX-90834914	160426458	600K_SNP	Haplotype_probs
0.890924	1.02212	0.87164	0	female_flowering_d6_ALL_qDTS8	AX-91101099	AX-91101099	128743539	600K_SNP	Haplotype_probs
-8.44941	4.34618	-2.14909	1	female_flowering_d6_ALL_qDTS8	AX-91101099	AX-91101099	128743539	600K_SNP	Haplotype_probs
-1.77383	3.62591	-0.48921	0	female_flowering_d6_ALL_qDTS9	AX-91146091	AX-91146091	118776019	600K_SNP	Haplotype_probs
0.220962	3.98166	0.500994	1	female_flowering_d6_ALL_qDTS9	AX-91146091	AX-91146091	118776019	600K_SNP	Haplotype_probs
8.45759	1.58707	5.32904	0	female_flowering_d6_BLOIS_2014_OPT_qDTS3_2	AX-90590040	AX-90590040	160559346	600K_SNP	600K_SNP
-8.42053	2.70326	-6.24361	1	female_flowering_d6_BLOIS_2014_OPT_qDTS3_2	AX-90590040	AX-90590040	160559346	600K_SNP	600K_SNP
18.5906	2.59423	7.16614	0	female_flowering_d6_BLOIS_2014_OPT_qDTS8	AX-91100974	AX-91100974	128360587	600K_SNP	600K_SNP
-5.26943	3.2144	-7.42286	1	female_flowering_d6_BLOIS_2014_OPT_qDTS8	AX-91100974	AX-91100974	128360587	600K_SNP	600K_SNP
-1.2934	1.69949	-0.761051	0	female_flowering_d6_BLOIS_2014_OPT_qDTS3_2	AX-90834914	AX-90834914	160426458	600K_SNP	Founder_probs
1.43515	2.91249	0.936844	1	female_flowering_d6_BLOIS_2014_OPT_qDTS3_2	AX-90834914	AX-90834914	160426458	600K_SNP	Founder_probs
15.7557	2.66274	5.91712	0	female_flowering_d6_BLOIS_2014_OPT_qDTS8	PZA01038.1	PZA01038.1	128420026	600K_SNP	Founder_probs
-4.4146	3.23742	-6.23038	1	female_flowering_d6_BLOIS_2014_OPT_qDTS8	PZA01038.1	PZA01038.1	128420026	600K_SNP	Founder_probs
1.46664	1.2795	1.14626	0	female_flowering_d6_BLOIS_2014_OPT_qDTS9	AX-91146185	AX-91146185	119413544	600K_SNP	Founder_probs
-2.86918	3.03884	-1.4268	1	female_flowering_d6_BLOIS_2014_OPT_qDTS9	AX-91146185	AX-91146185	119413544	600K_SNP	Founder_probs
2.49809	1.1069	2.25683	0	female_flowering_d6_BLOIS_2014_OPT_qDTS3_2	AX-90834861	AX-90834861	160277722	600K_SNP	Haplotype_probs
-15.0217	4.03481	-4.34217	1	female_flowering_d6_BLOIS_2014_OPT_qDTS3_2	AX-90834861	AX-90834861	160277722	600K_SNP	Haplotype_probs
-0.630377	1.1416	-0.552187	0	female_flowering_d6_BLOIS_2014_OPT_qDTS8	AX-91442756	AX-91442756	130607082	600K_SNP	Haplotype_probs
5.59541	4.569	1.36262	1	female_flowering_d6_BLOIS_2014_OPT_qDTS8	AX-91442756	AX-91442756	130607082	600K_SNP	Haplotype_probs
-1.0319	0.926953	-1.11322	0	female_flowering_d6_BLOIS_2014_OPT_qDTS9	AX-91800534	AX-91800534	120969378	600K_SNP	Haplotype_probs
10.7387	4.8715	2.41622	1	female_flowering_d6_BLOIS_2014_OPT_qDTS9	AX-91800534	AX-91800534	120969378	600K_SNP	Haplotype_probs
8.13739	1.75947	4.6249	0	female_flowering_d6_BLOIS_2017_OPT_qDTS8	PZE-108089600	PZE-108089600	150981849	600K_SNP	600K_SNP
-9.36634	2.7824	-6.29088	1	female_flowering_d6_BLOIS_2017_OPT_qDTS8	PZE-108089600	PZE-108089600	150981849	600K_SNP	600K_SNP
-2.65419	1.94435	-1.36508	0	female_flowering_d6_BLOIS_2017_OPT_qDTS3_2	AX-90834914	AX-90834914	160426458	600K_SNP	Founder_probs
2.88735	2.92268	1.89605	1	female_flowering_d6_BLOIS_2017_OPT_qDTS3_2	AX-90834914	AX-90834914	160426458	600K_SNP	Founder_probs
-0.76519	1.63467	-0.468101	0	female_flowering_d6_BLOIS_2017_OPT_qDTS8	AX-91771730	AX-91771730	146686920	600K_SNP	Founder_probs
1.8356	3.27204	0.794852	1	female_flowering_d6_BLOIS_2017_OPT_qDTS8	AX-91771730	AX-91771730	146686920	600K_SNP	Founder_probs
-2.65419	1.94435	-1.36508	0	female_flowering_d6_BLOIS_2017_OPT_qDTS3_2	AX-90834914	AX-90834914	160426458	600K_SNP	Haplotype_probs
2.88735	2.92268	1.89605	1	female_flowering_d6_BLOIS_2017_OPT_qDTS3_2	AX-90834914	AX-90834914	160426458	600K_SNP	Haplotype_probs
2.96898	1.51111	1.96476	0	female_flowering_d6_BLOIS_2017_OPT_qDTS8	AX-91106528	AX-91106528	148924506	600K_SNP	Haplotype_probs
-9.11173	3.32585	-3.63237	1	female_flowering_d6_BLOIS_2017_OPT_qDTS8	AX-91106528	AX-91106528	148924506	600K_SNP	Haplotype_probs
-4.57745	1.13796	-4.02252	0	female_flowering_d6_GRANEROS_2015_OPT_qDTS3_2	AX-90835099	AX-90835099	161296968	600K_SNP	600K_SNP
20.787	3.98568	6.36391	1	female_flowering_d6_GRANEROS_2015_OPT_qDTS3_2	AX-90835099	AX-90835099	161296968	600K_SNP	600K_SNP
11.4896	1.8775	6.1196	0	female_flowering_d6_GRANEROS_2015_OPT_qDTS8	AX-91099031	AX-91099031	120807460	600K_SNP	600K_SNP
-9.78824	3.10783	-6.84652	1	female_flowering_d6_GRANEROS_2015_OPT_qDTS8	AX-91099031	AX-91099031	120807460	600K_SNP	600K_SNP
-3.11074	1.29252	-2.40673	0	female_flowering_d6_GRANEROS_2015_OPT_qDTS3_2	AX-90835093	AX-90835093	161293416	600K_SNP	Founder_probs
11.2823	3.94956	3.64423	1	female_flowering_d6_GRANEROS_2015_OPT_qDTS3_2	AX-90835093	AX-90835093	161293416	600K_SNP	Founder_probs
-0.297234	2.86109	-0.103888	0	female_flowering_d6_GRANEROS_2015_OPT_qDTS8	AX-91099134	AX-91099134	121124614	600K_SNP	Founder_probs
0.185161	3.70858	0.130076	1	female_flowering_d6_GRANEROS_2015_OPT_qDTS8	AX-91099134	AX-91099134	121124614	600K_SNP	Founder_probs
-1.5756	1.94745	-0.809059	0	female_flowering_d6_GRANEROS_2015_OPT_qDTS3_2	AX-90834914	AX-90834914	160426458	600K_SNP	Haplotype_probs
1.54486	3.3475	0.932178	1	female_flowering_d6_GRANEROS_2015_OPT_qDTS3_2	AX-90834914	AX-90834914	160426458	600K_SNP	Haplotype_probs
-0.0992679	1.45215	-0.0683591	0	female_flowering_d6_GRANEROS_2015_OPT_qDTS8	AX-90590533	AX-90590533	120660344	600K_SNP	Haplotype_probs
0.626789	4.32579	0.167844	1	female_flowering_d6_GRANEROS_2015_OPT_qDTS8	AX-90590533	AX-90590533	120660344	600K_SNP	Haplotype_probs
5.82451	2.0134	2.89288	0	female_flowering_d6_NERAC_2016_WD_qDTS3_2	AX-90586701	AX-90586701	160559504	600K_SNP	600K_SNP
-26.6165	5.4671	-5.93387	1	female_flowering_d6_NERAC_2016_WD_qDTS3_2	AX-90586701	AX-90586701	160559504	600K_SNP	600K_SNP
-3.14642	2.81901	-1.11614	0	female_flowering_d6_NERAC_2016_WD_qDTS3_2	AX-90834914	AX-90834914	160426458	600K_SNP	Founder_probs
3.31798	4.38938	1.47274	1	female_flowering_d6_NERAC_2016_WD_qDTS3_2	AX-90834914	AX-90834914	160426458	600K_SNP	Founder_probs
9.84601	3.79893	2.59179	0	female_flowering_d6_NERAC_2016_WD_qDTS3_1	AX-90796878	AX-90796878	10867320	600K_SNP	Haplotype_probs
-4.40846	4.79186	-2.97473	1	female_flowering_d6_NERAC_2016_WD_qDTS3_1	AX-90796878	AX-90796878	10867320	600K_SNP	Haplotype_probs
-3.30796	2.33676	-1.41562	0	female_flowering_d6_NERAC_2016_WD_qDTS3_2	AX-91583302	AX-91583302	160518557	600K_SNP	Haplotype_probs
8.33766	4.87428	2.3892	1	female_flowering_d6_NERAC_2016_WD_qDTS3_2	AX-91583302	AX-91583302	160518557	600K_SNP	Haplotype_probs
-6.20722	1.82248	-3.40592	0	female_flowering_d6_SZEGED_2017_OPT_qDTS3_2	AX-91383809	AX-91383809	157563421	600K_SNP	600K_SNP
12.7274	3.42915	5.52167	1	female_flowering_d6_SZEGED_2017_OPT_qDTS3_2	AX-91383809	AX-91383809	157563421	600K_SNP	600K_SNP
10.5481	2.33638	4.51473	0	female_flowering_d6_SZEGED_2017_OPT_qDTS8	AX-91100991	AX-91100991	128360284	600K_SNP	600K_SNP
-7.41003	3.25602	-5.51536	1	female_flowering_d6_SZEGED_2017_OPT_qDTS8	AX-91100991	AX-91100991	128360284	600K_SNP	600K_SNP
-1.05178	2.25875	-0.465645	0	female_flowering_d6_SZEGED_2017_OPT_qDTS3_2	AX-90834914	AX-90834914	160426458	600K_SNP	Founder_probs
1.12417	3.38228	0.643336	1	female_flowering_d6_SZEGED_2017_OPT_qDTS3_2	AX-90834914	AX-90834914	160426458	600K_SNP	Founder_probs
-0.250714	1.91636	-0.130829	0	female_flowering_d6_SZEGED_2017_OPT_qDTS8	AX-91106686	AX-91106686	149592078	600K_SNP	Founder_probs
0.307453	3.46939	0.160883	1	female_flowering_d6_SZEGED_2017_OPT_qDTS8	AX-91106686	AX-91106686	149592078	600K_SNP	Founder_probs
-1.05178	2.25875	-0.465645	0	female_flowering_d6_SZEGED_2017_OPT_qDTS3_2	AX-90834914	AX-90834914	160426458	600K_SNP	Haplotype_probs
1.12417	3.38228	0.643336	1	female_flowering_d6_SZEGED_2017_OPT_qDTS3_2	AX-90834914	AX-90834914	160426458	600K_SNP	Haplotype_probs
2.34111	1.81089	1.2928	0	female_flowering_d6_SZEGED_2017_OPT_qDTS8	PZE-108085812	PZE-108085812	146992030	600K_SNP	Haplotype_probs
-5.09844	3.51525	-2.11637	1	female_flowering_d6_SZEGED_2017_OPT_qDTS8	PZE-108085812	PZE-108085812	146992030	600K_SNP	Haplotype_probs
-1.67332	0.573987	-2.91525	0	grain_yield_15_STPAUL_2017_WD_qGYD1_1	AX-91465366	AX-91465366	64728836	600K_SNP	600K_SNP
5.04841	1.28728	5.22168	1	grain_yield_15_STPAUL_2017_WD_qGYD1_1	AX-91465366	AX-91465366	64728836	600K_SNP	600K_SNP
1.05147	0.501156	2.09808	0	grain_yield_15_STPAUL_2017_WD_qGYD1_2	AX-91439687	AX-91439687	173401292	600K_SNP	600K_SNP
-7.72519	1.64847	-5.32413	1	grain_yield_15_STPAUL_2017_WD_qGYD1_2	AX-91439687	AX-91439687	173401292	600K_SNP	600K_SNP
5.23496	1.07997	4.84732	0	grain_yield_15_STPAUL_2017_WD_qGYD5	PZE-105031901	PZE-105031901	18196101	600K_SNP	600K_SNP
-1.84202	1.27314	-5.55867	1	grain_yield_15_STPAUL_2017_WD_qGYD5	PZE-105031901	PZE-105031901	18196101	600K_SNP	600K_SNP
-0.131928	0.0439678	-3.00056	0	harvest_grain_moisture_ALL_qHGM3_2	AX-90830981	AX-90830981	143969848	600K_SNP	600K_SNP
0.471968	0.110008	5.48955	1	harvest_grain_moisture_ALL_qHGM3_2	AX-90830981	AX-90830981	143969848	600K_SNP	600K_SNP
0.022432	0.0415499	0.539881	0	harvest_grain_moisture_ALL_qHGM3_1	AX-90799820	AX-90799820	22276352	600K_SNP	Founder_probs
-0.257968	0.172342	-1.62699	1	harvest_grain_moisture_ALL_qHGM3_1	AX-90799820	AX-90799820	22276352	600K_SNP	Founder_probs
-0.061623	0.0508579	-1.21167	0	harvest_grain_moisture_ALL_qHGM3_2	PZE-103084819	PZE-103084819	141333098	600K_SNP	Founder_probs
0.130949	0.100622	1.91381	1	harvest_grain_moisture_ALL_qHGM3_2	PZE-103084819	PZE-103084819	141333098	600K_SNP	Founder_probs
0.0497011	0.0528478	0.940457	0	harvest_grain_moisture_ALL_qHGM3_2	AX-91579535	AX-91579535	138469858	600K_SNP	Haplotype_probs
-0.0958202	0.100821	-1.44337	1	harvest_grain_moisture_ALL_qHGM3_2	AX-91579535	AX-91579535	138469858	600K_SNP	Haplotype_probs
-0.266307	0.0688555	-3.86763	0	harvest_grain_moisture_BLOIS_2014_OPT_qHGM3_1	AX-91556625	AX-91556625	16418140	600K_SNP	600K_SNP
0.223969	0.0948329	5.1699	1	harvest_grain_moisture_BLOIS_2014_OPT_qHGM3_1	AX-91556625	AX-91556625	16418140	600K_SNP	600K_SNP
-0.0115117	0.0411166	-0.279976	0	harvest_grain_moisture_GRANEROS_2015_OPT_qHGM2	AX-90784366	AX-90784366	210205273	600K_SNP	Founder_probs
0.374669	0.310596	1.24335	1	harvest_grain_moisture_GRANEROS_2015_OPT_qHGM2	AX-90784366	AX-90784366	210205273	600K_SNP	Founder_probs
-3.38655	0.944581	-3.58525	0	male_flowering_d6_ALL_qDTA3_2	AX-90835099	AX-90835099	161296968	600K_SNP	600K_SNP
15.2682	3.04385	6.12866	1	male_flowering_d6_ALL_qDTA3_2	AX-90835099	AX-90835099	161296968	600K_SNP	600K_SNP
10.2341	1.58874	6.44164	0	male_flowering_d6_ALL_qDTA8	AX-91100991	AX-91100991	128360284	600K_SNP	600K_SNP
-6.99947	2.38852	-7.21515	1	male_flowering_d6_ALL_qDTA8	AX-91100991	AX-91100991	128360284	600K_SNP	600K_SNP
-1.74414	1.47377	-1.18346	0	male_flowering_d6_ALL_qDTA3_2	AX-90834914	AX-90834914	160426458	600K_SNP	Founder_probs
1.88949	2.50078	1.453	1	male_flowering_d6_ALL_qDTA3_2	AX-90834914	AX-90834914	160426458	600K_SNP	Founder_probs
-1.91254	1.01997	-1.87509	0	male_flowering_d6_ALL_qDTA8	AX-91102763	AX-91102763	135165296	600K_SNP	Founder_probs
8.44706	3.21825	3.21902	1	male_flowering_d6_ALL_qDTA8	AX-91102763	AX-91102763	135165296	600K_SNP	Founder_probs
-3.43988	3.49704	-0.983656	0	male_flowering_d6_ALL_qDTA9	AX-91146091	AX-91146091	118776019	600K_SNP	Founder_probs
0.428497	3.84461	1.00618	1	male_flowering_d6_ALL_qDTA9	AX-91146091	AX-91146091	118776019	600K_SNP	Founder_probs
10.2307	4.56654	2.24036	0	male_flowering_d6_ALL_qDTA3_1	AX-90796949	AX-90796949	11159770	600K_SNP	Haplotype_probs
-0.779158	4.82895	-2.27997	1	male_flowering_d6_ALL_qDTA3_1	AX-90796949	AX-90796949	11159770	600K_SNP	Haplotype_probs
-1.74414	1.47377	-1.18346	0	male_flowering_d6_ALL_qDTA3_2	AX-90834914	AX-90834914	160426458	600K_SNP	Haplotype_probs
1.88949	2.50078	1.453	1	male_flowering_d6_ALL_qDTA3_2	AX-90834914	AX-90834914	160426458	600K_SNP	Haplotype_probs
-0.0773408	1.08766	-0.0711078	0	male_flowering_d6_ALL_qDTA8	AX-91102778	AX-91102778	135145003	600K_SNP	Haplotype_probs
0.303504	3.09281	0.123139	1	male_flowering_d6_ALL_qDTA8	AX-91102778	AX-91102778	135145003	600K_SNP	Haplotype_probs
8.09674	1.51383	5.34852	0	male_flowering_d6_BLOIS_2014_OPT_qDTA3_2	AX-91583310	AX-91583310	160559294	600K_SNP	600K_SNP
-8.19707	2.58625	-6.30017	1	male_flowering_d6_BLOIS_2014_OPT_qDTA3_2	AX-91583310	AX-91583310	160559294	600K_SNP	600K_SNP
14.6124	2.02101	7.23024	0	male_flowering_d6_BLOIS_2014_OPT_qDTA8	AX-90635917	AX-90635917	137872380	600K_SNP	600K_SNP
-7.00786	2.7519	-7.85646	1	male_flowering_d6_BLOIS_2014_OPT_qDTA8	AX-90635917	AX-90635917	137872380	600K_SNP	600K_SNP
0.523445	1.13786	0.460025	0	male_flowering_d6_BLOIS_2014_OPT_qDTA3_2	AX-90834556	AX-90834556	158988768	600K_SNP	Founder_probs
-2.15607	3.31488	-0.80833	1	male_flowering_d6_BLOIS_2014_OPT_qDTA3_2	AX-90834556	AX-90834556	158988768	600K_SNP	Founder_probs
16.3993	2.56812	6.38573	0	male_flowering_d6_BLOIS_2014_OPT_qDTA8	PZA01038.1	PZA01038.1	128420026	600K_SNP	Founder_probs
-4.66304	3.11869	-6.7536	1	male_flowering_d6_BLOIS_2014_OPT_qDTA8	PZA01038.1	PZA01038.1	128420026	600K_SNP	Founder_probs
2.382	1.05532	2.25713	0	male_flowering_d6_BLOIS_2014_OPT_qDTA3_2	AX-90834861	AX-90834861	160277722	600K_SNP	Haplotype_probs
-14.754	3.86259	-4.43641	1	male_flowering_d6_BLOIS_2014_OPT_qDTA3_2	AX-90834861	AX-90834861	160277722	600K_SNP	Haplotype_probs
0.533361	1.08924	0.489663	0	male_flowering_d6_BLOIS_2014_OPT_qDTA8	AX-91101099	AX-91101099	128743539	600K_SNP	Haplotype_probs
-4.59113	4.75649	-1.07737	1	male_flowering_d6_BLOIS_2014_OPT_qDTA8	AX-91101099	AX-91101099	128743539	600K_SNP	Haplotype_probs
8.25498	2.03184	4.06282	0	male_flowering_d6_BLOIS_2017_OPT_qDTA8	AX-91106658	AX-91106658	149450033	600K_SNP	600K_SNP
-10.7818	3.29485	-5.77773	1	male_flowering_d6_BLOIS_2017_OPT_qDTA8	AX-91106658	AX-91106658	149450033	600K_SNP	600K_SNP
-3.29702	2.09251	-1.57563	0	male_flowering_d6_BLOIS_2017_OPT_qDTA3_1	AX-90796752	AX-90796752	10269770	600K_SNP	Founder_probs
5.49007	3.55007	2.47519	1	male_flowering_d6_BLOIS_2017_OPT_qDTA3_1	AX-90796752	AX-90796752	10269770	600K_SNP	Founder_probs
-4.3121	2.32294	-1.85631	0	male_flowering_d6_BLOIS_2017_OPT_qDTA3_2	AX-90834914	AX-90834914	160426458	600K_SNP	Founder_probs
4.61768	3.45025	2.58815	1	male_flowering_d6_BLOIS_2017_OPT_qDTA3_2	AX-90834914	AX-90834914	160426458	600K_SNP	Founder_probs
5.39937	2.72438	1.98187	0	male_flowering_d6_BLOIS_2017_OPT_qDTA8	AX-91106569	AX-91106569	148965697	600K_SNP	Founder_probs
-3.00598	3.58164	-2.34679	1	male_flowering_d6_BLOIS_2017_OPT_qDTA8	AX-91106569	AX-91106569	148965697	600K_SNP	Founder_probs
6.32826	6.49895	0.973736	0	male_flowering_d6_BLOIS_2017_OPT_qDTA3_1	AX-90796949	AX-90796949	11159770	600K_SNP	Haplotype_probs
-0.467973	6.76962	-1.00393	1	male_flowering_d6_BLOIS_2017_OPT_qDTA3_1	AX-90796949	AX-90796949	11159770	600K_SNP	Haplotype_probs
-4.3121	2.32294	-1.85631	0	male_flowering_d6_BLOIS_2017_OPT_qDTA3_2	AX-90834914	AX-90834914	160426458	600K_SNP	Haplotype_probs
4.61768	3.45025	2.58815	1	male_flowering_d6_BLOIS_2017_OPT_qDTA3_2	AX-90834914	AX-90834914	160426458	600K_SNP	Haplotype_probs
-1.40992	1.8893	-0.746266	0	male_flowering_d6_BLOIS_2017_OPT_qDTA8	AX-91106190	AX-91106190	147721206	600K_SNP	Haplotype_probs
3.18757	3.70494	1.24091	1	male_flowering_d6_BLOIS_2017_OPT_qDTA8	AX-91106190	AX-91106190	147721206	600K_SNP	Haplotype_probs
-4.1836	1.17258	-3.56788	0	male_flowering_d6_GRANEROS_2015_OPT_qDTA3_2	AX-90835099	AX-90835099	161296968	600K_SNP	600K_SNP
18.7208	3.81542	6.00311	1	male_flowering_d6_GRANEROS_2015_OPT_qDTA3_2	AX-90835099	AX-90835099	161296968	600K_SNP	600K_SNP
-28.6455	5.2655	-5.44023	0	male_flowering_d6_GRANEROS_2015_OPT_qDTA7	AX-91026083	AX-91026083	15643214	600K_SNP	600K_SNP
2.09156	5.60892	5.48003	1	male_flowering_d6_GRANEROS_2015_OPT_qDTA7	AX-91026083	AX-91026083	15643214	600K_SNP	600K_SNP
14.0688	2.36795	5.94135	0	male_flowering_d6_GRANEROS_2015_OPT_qDTA8	AX-91103301	AX-91103301	137170932	600K_SNP	600K_SNP
-6.82815	3.21824	-6.4933	1	male_flowering_d6_GRANEROS_2015_OPT_qDTA8	AX-91103301	AX-91103301	137170932	600K_SNP	600K_SNP
-2.81295	1.29766	-2.16771	0	male_flowering_d6_GRANEROS_2015_OPT_qDTA3_2	AX-90835093	AX-90835093	161293416	600K_SNP	Founder_probs
10.0315	3.75646	3.41931	1	male_flowering_d6_GRANEROS_2015_OPT_qDTA3_2	AX-90835093	AX-90835093	161293416	600K_SNP	Founder_probs
-1.20993	1.23668	-0.978374	0	male_flowering_d6_GRANEROS_2015_OPT_qDTA7	AX-91715233	AX-91715233	14405491	600K_SNP	Founder_probs
3.8525	3.62874	1.39509	1	male_flowering_d6_GRANEROS_2015_OPT_qDTA7	AX-91715233	AX-91715233	14405491	600K_SNP	Founder_probs
-1.99028	1.14999	-1.73069	0	male_flowering_d6_GRANEROS_2015_OPT_qDTA8	AX-91102858	AX-91102858	135530058	600K_SNP	Founder_probs
19.5606	5.49865	3.91931	1	male_flowering_d6_GRANEROS_2015_OPT_qDTA8	AX-91102858	AX-91102858	135530058	600K_SNP	Founder_probs
-2.57667	1.87829	-1.37182	0	male_flowering_d6_GRANEROS_2015_OPT_qDTA3_2	AX-90834914	AX-90834914	160426458	600K_SNP	Haplotype_probs
2.55802	3.15701	1.62644	1	male_flowering_d6_GRANEROS_2015_OPT_qDTA3_2	AX-90834914	AX-90834914	160426458	600K_SNP	Haplotype_probs
-0.306526	1.39847	-0.219187	0	male_flowering_d6_GRANEROS_2015_OPT_qDTA8	AX-91102778	AX-91102778	135145003	600K_SNP	Haplotype_probs
1.24269	3.9146	0.395753	1	male_flowering_d6_GRANEROS_2015_OPT_qDTA8	AX-91102778	AX-91102778	135145003	600K_SNP	Haplotype_probs
4.55203	1.63235	2.78863	0	male_flowering_d6_NERAC_2016_WD_qDTA3_2	AX-90834975	AX-90834975	160684332	600K_SNP	600K_SNP
-22.4829	4.83478	-5.59176	1	male_flowering_d6_NERAC_2016_WD_qDTA3_2	AX-90834975	AX-90834975	160684332	600K_SNP	600K_SNP
10.2745	2.26549	4.53522	0	male_flowering_d6_NERAC_2016_WD_qDTA8	AX-91767208	AX-91767208	120465900	600K_SNP	600K_SNP
-9.20897	3.62652	-5.3725	1	male_flowering_d6_NERAC_2016_WD_qDTA8	AX-91767208	AX-91767208	120465900	600K_SNP	600K_SNP
-3.18767	2.37307	-1.34327	0	male_flowering_d6_NERAC_2016_WD_qDTA3_2	AX-90834914	AX-90834914	160426458	600K_SNP	Founder_probs
2.78873	3.845	1.55433	1	male_flowering_d6_NERAC_2016_WD_qDTA3_2	AX-90834914	AX-90834914	160426458	600K_SNP	Founder_probs
2.16316	1.78006	1.21522	0	male_flowering_d6_NERAC_2016_WD_qDTA8	AX-91772402	AX-91772402	150234596	600K_SNP	Founder_probs
-7.66211	4.48945	-2.18853	1	male_flowering_d6_NERAC_2016_WD_qDTA8	AX-91772402	AX-91772402	150234596	600K_SNP	Founder_probs
-3.12108	1.91873	-1.62664	0	male_flowering_d6_NERAC_2016_WD_qDTA3_2	AX-91583302	AX-91583302	160518557	600K_SNP	Haplotype_probs
6.93012	4.28298	2.34678	1	male_flowering_d6_NERAC_2016_WD_qDTA3_2	AX-91583302	AX-91583302	160518557	600K_SNP	Haplotype_probs
6.53527	5.74325	1.1379	0	male_flowering_d6_NERAC_2016_WD_qDTA8	PZE-108088314	PZE-108088314	149988558	600K_SNP	Haplotype_probs
-0.984251	6.23483	-1.20605	1	male_flowering_d6_NERAC_2016_WD_qDTA8	PZE-108088314	PZE-108088314	149988558	600K_SNP	Haplotype_probs
-2.25811	1.3582	-1.66257	0	male_flowering_d6_STPAUL_2017_WD_qDTA3_2	PZB00228.4	PZB00228.4	156128886	600K_SNP	600K_SNP
28.3133	5.60381	5.45546	1	male_flowering_d6_STPAUL_2017_WD_qDTA3_2	PZB00228.4	PZB00228.4	156128886	600K_SNP	600K_SNP
14.611	2.6982	5.41507	0	male_flowering_d6_STPAUL_2017_WD_qDTA8	PZE-108070380	PZE-108070380	126885610	600K_SNP	600K_SNP
-5.73447	3.34071	-6.09015	1	male_flowering_d6_STPAUL_2017_WD_qDTA8	PZE-108070380	PZE-108070380	126885610	600K_SNP	600K_SNP
-1.45964	3.66529	-0.398234	0	male_flowering_d6_STPAUL_2017_WD_qDTA3_2	PZE-103093413	PZE-103093413	155999962	600K_SNP	Founder_probs
0.423949	4.13384	0.455652	1	male_flowering_d6_STPAUL_2017_WD_qDTA3_2	PZE-103093413	PZE-103093413	155999962	600K_SNP	Founder_probs
-1.57104	1.76777	-0.888712	0	male_flowering_d6_STPAUL_2017_WD_qDTA8	AX-91771730	AX-91771730	146686920	600K_SNP	Founder_probs
4.04971	3.56364	1.57725	1	male_flowering_d6_STPAUL_2017_WD_qDTA8	AX-91771730	AX-91771730	146686920	600K_SNP	Founder_probs
2.53705	3.05156	0.831394	0	male_flowering_d6_STPAUL_2017_WD_qDTA9	AX-91145110	AX-91145110	116613531	600K_SNP	Founder_probs
-0.682627	3.63474	-0.885808	1	male_flowering_d6_STPAUL_2017_WD_qDTA9	AX-91145110	AX-91145110	116613531	600K_SNP	Founder_probs
-3.07449	1.86978	-1.64431	0	male_flowering_d6_STPAUL_2017_WD_qDTA3_2	AX-90834152	AX-90834152	157175061	600K_SNP	Haplotype_probs
5.43187	3.28188	2.59192	1	male_flowering_d6_STPAUL_2017_WD_qDTA3_2	AX-90834152	AX-90834152	157175061	600K_SNP	Haplotype_probs
0.51633	1.53089	0.337273	0	male_flowering_d6_STPAUL_2017_WD_qDTA8	AX-91101099	AX-91101099	128743539	600K_SNP	Haplotype_probs
-4.41447	5.3857	-0.915535	1	male_flowering_d6_STPAUL_2017_WD_qDTA8	AX-91101099	AX-91101099	128743539	600K_SNP	Haplotype_probs
-0.945551	1.7362	-0.544608	0	male_flowering_d6_STPAUL_2017_WD_qDTA9	AX-91799201	AX-91799201	114817909	600K_SNP	Haplotype_probs
2.2155	3.34514	0.944967	1	male_flowering_d6_STPAUL_2017_WD_qDTA9	AX-91799201	AX-91799201	114817909	600K_SNP	Haplotype_probs
10.5313	2.21847	4.74708	0	male_flowering_d6_SZEGED_2017_OPT_qDTA8	AX-91103301	AX-91103301	137170932	600K_SNP	600K_SNP
-5.5667	2.93688	-5.48131	1	male_flowering_d6_SZEGED_2017_OPT_qDTA8	AX-91103301	AX-91103301	137170932	600K_SNP	600K_SNP
-0.366057	1.52624	-0.239843	0	male_flowering_d6_SZEGED_2017_OPT_qDTA8	AX-91771730	AX-91771730	146686920	600K_SNP	Founder_probs
0.712232	3.27357	0.329392	1	male_flowering_d6_SZEGED_2017_OPT_qDTA8	AX-91771730	AX-91771730	146686920	600K_SNP	Founder_probs
2.01309	1.52785	1.3176	0	male_flowering_d6_SZEGED_2017_OPT_qDTA8	PZE-108085812	PZE-108085812	146992030	600K_SNP	Haplotype_probs
-4.42797	3.03918	-2.11934	1	male_flowering_d6_SZEGED_2017_OPT_qDTA8	PZE-108085812	PZE-108085812	146992030	600K_SNP	Haplotype_probs
5.29016	1.10834	4.77303	0	tkw_15_ALL_qTKW5	AX-90920941	AX-90920941	1723080	600K_SNP	600K_SNP
-2.56053	1.45896	-5.38102	1	tkw_15_ALL_qTKW5	AX-90920941	AX-90920941	1723080	600K_SNP	600K_SNP
2.48289	1.01894	2.43675	0	tkw_15_BLOIS_2017_OPT_qTKW7_1	AX-91025554	AX-91025554	13512960	600K_SNP	600K_SNP
-10.2262	2.37021	-5.362	1	tkw_15_BLOIS_2017_OPT_qTKW7_1	AX-91025554	AX-91025554	13512960	600K_SNP	600K_SNP
1.58168	1.43029	1.10585	0	tkw_15_BLOIS_2017_OPT_qTKW7_1	SYN16002	SYN16002	18112119	600K_SNP	Founder_probs
-1.36683	1.99008	-1.48161	1	tkw_15_BLOIS_2017_OPT_qTKW7_1	SYN16002	SYN16002	18112119	600K_SNP	Founder_probs
-0.312492	0.989841	-0.315699	0	tkw_15_BLOIS_2017_OPT_qTKW7_1	AX-91201362	AX-91201362	12663253	600K_SNP	Haplotype_probs
1.42613	2.74257	0.633939	1	tkw_15_BLOIS_2017_OPT_qTKW7_1	AX-91201362	AX-91201362	12663253	600K_SNP	Haplotype_probs
7.18342	1.63496	4.39363	0	tkw_15_GRANEROS_2015_OPT_qTKW7_2	AX-91734623	AX-91734623	124756367	600K_SNP	600K_SNP
-6.87981	2.35609	-5.96887	1	tkw_15_GRANEROS_2015_OPT_qTKW7_2	AX-91734623	AX-91734623	124756367	600K_SNP	600K_SNP
0.182631	1.36977	0.13333	0	tkw_15_GRANEROS_2015_OPT_qTKW7_2	AX-91053569	AX-91053569	126231741	600K_SNP	Founder_probs
-0.498093	2.73541	-0.248856	1	tkw_15_GRANEROS_2015_OPT_qTKW7_2	AX-91053569	AX-91053569	126231741	600K_SNP	Founder_probs
3.8535	0.667819	5.77028	0	total_plant_height_ALL_qTPH7	PZB02215.4	PZB02215.4	9548228	600K_SNP	600K_SNP
-1.68804	0.921503	-6.01358	1	total_plant_height_ALL_qTPH7	PZB02215.4	PZB02215.4	9548228	600K_SNP	600K_SNP
-2.20603	0.723498	-3.04911	0	total_plant_height_ALL_qTPH7	AX-91024553	AX-91024553	9361661	600K_SNP	Founder_probs
1.06776	0.971892	3.36847	1	total_plant_height_ALL_qTPH7	AX-91024553	AX-91024553	9361661	600K_SNP	Founder_probs
0.02431	0.433421	0.0560887	0	total_plant_height_ALL_qTPH7	PZE-107012564	PZE-107012564	9492287	600K_SNP	Haplotype_probs
-0.0654713	1.05185	-0.0853556	1	total_plant_height_ALL_qTPH7	PZE-107012564	PZE-107012564	9492287	600K_SNP	Haplotype_probs
4.4923	1.00968	4.44922	0	total_plant_height_BLOIS_2017_OPT_qTPH7	AX-91714501	AX-91714501	10085223	600K_SNP	600K_SNP
-3.1986	1.43299	-5.36703	1	total_plant_height_BLOIS_2017_OPT_qTPH7	AX-91714501	AX-91714501	10085223	600K_SNP	600K_SNP
1.18495	0.742217	1.5965	0	total_plant_height_NERAC_2016_WD_qTPH3	AX-90594684	AX-90594684	172884804	600K_SNP	600K_SNP
-15.8077	3.00116	-5.66204	1	total_plant_height_NERAC_2016_WD_qTPH3	AX-90594684	AX-90594684	172884804	600K_SNP	600K_SNP

## Sheet: FounderEffectSizes
EffectSize	SE	T-value	Founder	QTL_ID	PeakSNP	KeptSNP	Position	Method	FocalMethod
-0.713758	5.12982	-0.139139	B73_inra	female_flowering_d6_ALL_qDTS3_2	AX-91383809	AX-90834177	157563421	Founder_prob	600K_SNP
-3.82604	7.54119	-0.507352	A632_usa	female_flowering_d6_ALL_qDTS3_2	AX-91383809	AX-90834177	157563421	Founder_prob	600K_SNP
-11.849	5.26821	-2.24916	CO255_inra	female_flowering_d6_ALL_qDTS3_2	AX-91383809	AX-90834177	157563421	Founder_prob	600K_SNP
-15.4218	5.9237	-2.60341	FV252_inra	female_flowering_d6_ALL_qDTS3_2	AX-91383809	AX-90834177	157563421	Founder_prob	600K_SNP
10.8876	3.69846	2.94381	OH43_inra	female_flowering_d6_ALL_qDTS3_2	AX-91383809	AX-90834177	157563421	Founder_prob	600K_SNP
-8.43117	5.87553	-1.43496	A654_inra	female_flowering_d6_ALL_qDTS3_2	AX-91383809	AX-90834177	157563421	Founder_prob	600K_SNP
-4.18703	4.03726	-1.0371	FV2_inra	female_flowering_d6_ALL_qDTS3_2	AX-91383809	AX-90834177	157563421	Founder_prob	600K_SNP
-2.54648	4.17653	-0.609713	C103_inra	female_flowering_d6_ALL_qDTS3_2	AX-91383809	AX-90834177	157563421	Founder_prob	600K_SNP
-13.5945	4.59901	-2.95597	EP1_inra	female_flowering_d6_ALL_qDTS3_2	AX-91383809	AX-90834177	157563421	Founder_prob	600K_SNP
-0.773708	5.9332	-0.130403	D105_inra	female_flowering_d6_ALL_qDTS3_2	AX-91383809	AX-90834177	157563421	Founder_prob	600K_SNP
6.16417	6.29138	0.979781	W117_inra	female_flowering_d6_ALL_qDTS3_2	AX-91383809	AX-90834177	157563421	Founder_prob	600K_SNP
23.3204	4.23553	5.5059	B96	female_flowering_d6_ALL_qDTS3_2	AX-91383809	AX-90834177	157563421	Founder_prob	600K_SNP
1.01236	3.7326	0.271221	DK63	female_flowering_d6_ALL_qDTS3_2	AX-91383809	AX-90834177	157563421	Founder_prob	600K_SNP
5.2437	4.10718	1.27672	F492	female_flowering_d6_ALL_qDTS3_2	AX-91383809	AX-90834177	157563421	Founder_prob	600K_SNP
-6.02279	4.78051	-1.25986	ND245	female_flowering_d6_ALL_qDTS3_2	AX-91383809	AX-90834177	157563421	Founder_prob	600K_SNP
-1.93802	4.70723	-0.411712	VA85	female_flowering_d6_ALL_qDTS3_2	AX-91383809	AX-90834177	157563421	Founder_prob	600K_SNP
14.3176	3.7599	3.80798	B73_inra	female_flowering_d6_ALL_qDTS8	AX-91100991	AX-91100867	128360284	Founder_prob	600K_SNP
3.69029	5.51697	0.668898	A632_usa	female_flowering_d6_ALL_qDTS8	AX-91100991	AX-91100867	128360284	Founder_prob	600K_SNP
-2.3444	3.73046	-0.628448	CO255_inra	female_flowering_d6_ALL_qDTS8	AX-91100991	AX-91100867	128360284	Founder_prob	600K_SNP
10.5496	4.40163	2.39674	FV252_inra	female_flowering_d6_ALL_qDTS8	AX-91100991	AX-91100867	128360284	Founder_prob	600K_SNP
7.91719	6.32473	1.25178	OH43_inra	female_flowering_d6_ALL_qDTS8	AX-91100991	AX-91100867	128360284	Founder_prob	600K_SNP
-8.33047	3.56765	-2.335	A654_inra	female_flowering_d6_ALL_qDTS8	AX-91100991	AX-91100867	128360284	Founder_prob	600K_SNP
-2.13585	4.04564	-0.52794	FV2_inra	female_flowering_d6_ALL_qDTS8	AX-91100991	AX-91100867	128360284	Founder_prob	600K_SNP
1.18468	5.65565	0.209468	C103_inra	female_flowering_d6_ALL_qDTS8	AX-91100991	AX-91100867	128360284	Founder_prob	600K_SNP
-15.3708	5.17245	-2.97167	EP1_inra	female_flowering_d6_ALL_qDTS8	AX-91100991	AX-91100867	128360284	Founder_prob	600K_SNP
-9.71921	3.84614	-2.527	D105_inra	female_flowering_d6_ALL_qDTS8	AX-91100991	AX-91100867	128360284	Founder_prob	600K_SNP
-3.3543	4.49131	-0.746844	W117_inra	female_flowering_d6_ALL_qDTS8	AX-91100991	AX-91100867	128360284	Founder_prob	600K_SNP
18.6428	6.13283	3.03984	B96	female_flowering_d6_ALL_qDTS8	AX-91100991	AX-91100867	128360284	Founder_prob	600K_SNP
-14.1022	4.8501	-2.90762	DK63	female_flowering_d6_ALL_qDTS8	AX-91100991	AX-91100867	128360284	Founder_prob	600K_SNP
7.62785	6.46609	1.17967	F492	female_flowering_d6_ALL_qDTS8	AX-91100991	AX-91100867	128360284	Founder_prob	600K_SNP
-12.0174	5.33604	-2.25212	ND245	female_flowering_d6_ALL_qDTS8	AX-91100991	AX-91100867	128360284	Founder_prob	600K_SNP
16.1271	5.37997	2.99762	VA85	female_flowering_d6_ALL_qDTS8	AX-91100991	AX-91100867	128360284	Founder_prob	600K_SNP
3.89909	5.32562	0.732139	B73_inra	female_flowering_d6_ALL_qDTS3_2	AX-90834914	AX-90834914	160426458	Founder_prob	Founder_probs
1.62779	6.37935	0.255165	A632_usa	female_flowering_d6_ALL_qDTS3_2	AX-90834914	AX-90834914	160426458	Founder_prob	Founder_probs
-15.353	5.39337	-2.84664	CO255_inra	female_flowering_d6_ALL_qDTS3_2	AX-90834914	AX-90834914	160426458	Founder_prob	Founder_probs
-21.2089	5.81315	-3.64844	FV252_inra	female_flowering_d6_ALL_qDTS3_2	AX-90834914	AX-90834914	160426458	Founder_prob	Founder_probs
14.1033	3.80061	3.7108	OH43_inra	female_flowering_d6_ALL_qDTS3_2	AX-90834914	AX-90834914	160426458	Founder_prob	Founder_probs
-7.60564	5.89497	-1.29019	A654_inra	female_flowering_d6_ALL_qDTS3_2	AX-90834914	AX-90834914	160426458	Founder_prob	Founder_probs
-5.10462	4.56881	-1.11727	FV2_inra	female_flowering_d6_ALL_qDTS3_2	AX-90834914	AX-90834914	160426458	Founder_prob	Founder_probs
0.689276	4.24264	0.162464	C103_inra	female_flowering_d6_ALL_qDTS3_2	AX-90834914	AX-90834914	160426458	Founder_prob	Founder_probs
-20.4982	4.57349	-4.48196	EP1_inra	female_flowering_d6_ALL_qDTS3_2	AX-90834914	AX-90834914	160426458	Founder_prob	Founder_probs
0.0650924	5.62066	0.0115809	D105_inra	female_flowering_d6_ALL_qDTS3_2	AX-90834914	AX-90834914	160426458	Founder_prob	Founder_probs
6.1548	6.24167	0.986083	W117_inra	female_flowering_d6_ALL_qDTS3_2	AX-90834914	AX-90834914	160426458	Founder_prob	Founder_probs
17.9122	3.71054	4.82739	B96	female_flowering_d6_ALL_qDTS3_2	AX-90834914	AX-90834914	160426458	Founder_prob	Founder_probs
4.52552	3.49239	1.29582	DK63	female_flowering_d6_ALL_qDTS3_2	AX-90834914	AX-90834914	160426458	Founder_prob	Founder_probs
1.80549	4.20175	0.4297	F492	female_flowering_d6_ALL_qDTS3_2	AX-90834914	AX-90834914	160426458	Founder_prob	Founder_probs
-6.81398	4.71767	-1.44435	ND245	female_flowering_d6_ALL_qDTS3_2	AX-90834914	AX-90834914	160426458	Founder_prob	Founder_probs
-3.82414	4.68412	-0.816406	VA85	female_flowering_d6_ALL_qDTS3_2	AX-90834914	AX-90834914	160426458	Founder_prob	Founder_probs
13.2167	3.68024	3.59125	B73_inra	female_flowering_d6_ALL_qDTS8	PZA01038.1	PZA01038.1	128420026	Founder_prob	Founder_probs
4.52419	5.4707	0.826986	A632_usa	female_flowering_d6_ALL_qDTS8	PZA01038.1	PZA01038.1	128420026	Founder_prob	Founder_probs
-3.93875	3.54092	-1.11235	CO255_inra	female_flowering_d6_ALL_qDTS8	PZA01038.1	PZA01038.1	128420026	Founder_prob	Founder_probs
10.5266	4.3653	2.41144	FV252_inra	female_flowering_d6_ALL_qDTS8	PZA01038.1	PZA01038.1	128420026	Founder_prob	Founder_probs
14.3903	6.68677	2.15205	OH43_inra	female_flowering_d6_ALL_qDTS8	PZA01038.1	PZA01038.1	128420026	Founder_prob	Founder_probs
-8.81779	3.74375	-2.35534	A654_inra	female_flowering_d6_ALL_qDTS8	PZA01038.1	PZA01038.1	128420026	Founder_prob	Founder_probs
-2.64845	3.89816	-0.67941	FV2_inra	female_flowering_d6_ALL_qDTS8	PZA01038.1	PZA01038.1	128420026	Founder_prob	Founder_probs
-0.413543	5.41677	-0.076345	C103_inra	female_flowering_d6_ALL_qDTS8	PZA01038.1	PZA01038.1	128420026	Founder_prob	Founder_probs
-15.9169	5.27608	-3.01681	EP1_inra	female_flowering_d6_ALL_qDTS8	PZA01038.1	PZA01038.1	128420026	Founder_prob	Founder_probs
-9.90944	3.72367	-2.6612	D105_inra	female_flowering_d6_ALL_qDTS8	PZA01038.1	PZA01038.1	128420026	Founder_prob	Founder_probs
-4.71389	4.48424	-1.05121	W117_inra	female_flowering_d6_ALL_qDTS8	PZA01038.1	PZA01038.1	128420026	Founder_prob	Founder_probs
18.3343	6.08196	3.01454	B96	female_flowering_d6_ALL_qDTS8	PZA01038.1	PZA01038.1	128420026	Founder_prob	Founder_probs
-14.0264	4.81208	-2.91484	DK63	female_flowering_d6_ALL_qDTS8	PZA01038.1	PZA01038.1	128420026	Founder_prob	Founder_probs
10.5015	6.60689	1.58948	F492	female_flowering_d6_ALL_qDTS8	PZA01038.1	PZA01038.1	128420026	Founder_prob	Founder_probs
-10.1458	5.43143	-1.86798	ND245	female_flowering_d6_ALL_qDTS8	PZA01038.1	PZA01038.1	128420026	Founder_prob	Founder_probs
17.9002	5.54344	3.22908	VA85	female_flowering_d6_ALL_qDTS8	PZA01038.1	PZA01038.1	128420026	Founder_prob	Founder_probs
6.66133	4.80967	1.38499	B73_inra	female_flowering_d6_ALL_qDTS9	AX-91146185	AX-91146185	119413544	Founder_prob	Founder_probs
-18.7905	5.37862	-3.49356	A632_usa	female_flowering_d6_ALL_qDTS9	AX-91146185	AX-91146185	119413544	Founder_prob	Founder_probs
-10.8101	3.84902	-2.80852	CO255_inra	female_flowering_d6_ALL_qDTS9	AX-91146185	AX-91146185	119413544	Founder_prob	Founder_probs
-6.0993	4.51014	-1.35235	FV252_inra	female_flowering_d6_ALL_qDTS9	AX-91146185	AX-91146185	119413544	Founder_prob	Founder_probs
-0.0698944	4.63739	-0.0150719	OH43_inra	female_flowering_d6_ALL_qDTS9	AX-91146185	AX-91146185	119413544	Founder_prob	Founder_probs
-1.99812	3.70446	-0.539383	A654_inra	female_flowering_d6_ALL_qDTS9	AX-91146185	AX-91146185	119413544	Founder_prob	Founder_probs
6.61199	4.97623	1.32872	FV2_inra	female_flowering_d6_ALL_qDTS9	AX-91146185	AX-91146185	119413544	Founder_prob	Founder_probs
-1.3927	6.4857	-0.214734	C103_inra	female_flowering_d6_ALL_qDTS9	AX-91146185	AX-91146185	119413544	Founder_prob	Founder_probs
2.16526	4.77551	0.453409	EP1_inra	female_flowering_d6_ALL_qDTS9	AX-91146185	AX-91146185	119413544	Founder_prob	Founder_probs
3.92837	3.69821	1.06224	D105_inra	female_flowering_d6_ALL_qDTS9	AX-91146185	AX-91146185	119413544	Founder_prob	Founder_probs
11.7046	3.97637	2.94354	W117_inra	female_flowering_d6_ALL_qDTS9	AX-91146185	AX-91146185	119413544	Founder_prob	Founder_probs
19.9952	5.00215	3.99732	B96	female_flowering_d6_ALL_qDTS9	AX-91146185	AX-91146185	119413544	Founder_prob	Founder_probs
-7.43955	4.75491	-1.5646	DK63	female_flowering_d6_ALL_qDTS9	AX-91146185	AX-91146185	119413544	Founder_prob	Founder_probs
6.49271	4.73406	1.37149	F492	female_flowering_d6_ALL_qDTS9	AX-91146185	AX-91146185	119413544	Founder_prob	Founder_probs
5.64836	8.57463	0.65873	ND245	female_flowering_d6_ALL_qDTS9	AX-91146185	AX-91146185	119413544	Founder_prob	Founder_probs
-11.7862	4.11352	-2.86524	VA85	female_flowering_d6_ALL_qDTS9	AX-91146185	AX-91146185	119413544	Founder_prob	Founder_probs
3.89909	5.32562	0.732139	B73_inra	female_flowering_d6_ALL_qDTS3_2	AX-90834914	AX-90834914	160426458	Founder_prob	Haplotype_probs
1.62779	6.37935	0.255165	A632_usa	female_flowering_d6_ALL_qDTS3_2	AX-90834914	AX-90834914	160426458	Founder_prob	Haplotype_probs
-15.353	5.39337	-2.84664	CO255_inra	female_flowering_d6_ALL_qDTS3_2	AX-90834914	AX-90834914	160426458	Founder_prob	Haplotype_probs
-21.2089	5.81315	-3.64844	FV252_inra	female_flowering_d6_ALL_qDTS3_2	AX-90834914	AX-90834914	160426458	Founder_prob	Haplotype_probs
14.1033	3.80061	3.7108	OH43_inra	female_flowering_d6_ALL_qDTS3_2	AX-90834914	AX-90834914	160426458	Founder_prob	Haplotype_probs
-7.60564	5.89497	-1.29019	A654_inra	female_flowering_d6_ALL_qDTS3_2	AX-90834914	AX-90834914	160426458	Founder_prob	Haplotype_probs
-5.10462	4.56881	-1.11727	FV2_inra	female_flowering_d6_ALL_qDTS3_2	AX-90834914	AX-90834914	160426458	Founder_prob	Haplotype_probs
0.689276	4.24264	0.162464	C103_inra	female_flowering_d6_ALL_qDTS3_2	AX-90834914	AX-90834914	160426458	Founder_prob	Haplotype_probs
-20.4982	4.57349	-4.48196	EP1_inra	female_flowering_d6_ALL_qDTS3_2	AX-90834914	AX-90834914	160426458	Founder_prob	Haplotype_probs
0.0650924	5.62066	0.0115809	D105_inra	female_flowering_d6_ALL_qDTS3_2	AX-90834914	AX-90834914	160426458	Founder_prob	Haplotype_probs
6.1548	6.24167	0.986083	W117_inra	female_flowering_d6_ALL_qDTS3_2	AX-90834914	AX-90834914	160426458	Founder_prob	Haplotype_probs
17.9122	3.71054	4.82739	B96	female_flowering_d6_ALL_qDTS3_2	AX-90834914	AX-90834914	160426458	Founder_prob	Haplotype_probs
4.52552	3.49239	1.29582	DK63	female_flowering_d6_ALL_qDTS3_2	AX-90834914	AX-90834914	160426458	Founder_prob	Haplotype_probs
1.80549	4.20175	0.4297	F492	female_flowering_d6_ALL_qDTS3_2	AX-90834914	AX-90834914	160426458	Founder_prob	Haplotype_probs
-6.81398	4.71767	-1.44435	ND245	female_flowering_d6_ALL_qDTS3_2	AX-90834914	AX-90834914	160426458	Founder_prob	Haplotype_probs
-3.82414	4.68412	-0.816406	VA85	female_flowering_d6_ALL_qDTS3_2	AX-90834914	AX-90834914	160426458	Founder_prob	Haplotype_probs
13.2167	3.68024	3.59125	B73_inra	female_flowering_d6_ALL_qDTS8	AX-91101099	PZA01038.1	128743539	Founder_prob	Haplotype_probs
4.52419	5.4707	0.826986	A632_usa	female_flowering_d6_ALL_qDTS8	AX-91101099	PZA01038.1	128743539	Founder_prob	Haplotype_probs
-3.93875	3.54092	-1.11235	CO255_inra	female_flowering_d6_ALL_qDTS8	AX-91101099	PZA01038.1	128743539	Founder_prob	Haplotype_probs
10.5266	4.3653	2.41144	FV252_inra	female_flowering_d6_ALL_qDTS8	AX-91101099	PZA01038.1	128743539	Founder_prob	Haplotype_probs
14.3903	6.68677	2.15205	OH43_inra	female_flowering_d6_ALL_qDTS8	AX-91101099	PZA01038.1	128743539	Founder_prob	Haplotype_probs
-8.81779	3.74375	-2.35534	A654_inra	female_flowering_d6_ALL_qDTS8	AX-91101099	PZA01038.1	128743539	Founder_prob	Haplotype_probs
-2.64845	3.89816	-0.67941	FV2_inra	female_flowering_d6_ALL_qDTS8	AX-91101099	PZA01038.1	128743539	Founder_prob	Haplotype_probs
-0.413543	5.41677	-0.076345	C103_inra	female_flowering_d6_ALL_qDTS8	AX-91101099	PZA01038.1	128743539	Founder_prob	Haplotype_probs
-15.9169	5.27608	-3.01681	EP1_inra	female_flowering_d6_ALL_qDTS8	AX-91101099	PZA01038.1	128743539	Founder_prob	Haplotype_probs
-9.90944	3.72367	-2.6612	D105_inra	female_flowering_d6_ALL_qDTS8	AX-91101099	PZA01038.1	128743539	Founder_prob	Haplotype_probs
-4.71389	4.48424	-1.05121	W117_inra	female_flowering_d6_ALL_qDTS8	AX-91101099	PZA01038.1	128743539	Founder_prob	Haplotype_probs
18.3343	6.08196	3.01454	B96	female_flowering_d6_ALL_qDTS8	AX-91101099	PZA01038.1	128743539	Founder_prob	Haplotype_probs
-14.0264	4.81208	-2.91484	DK63	female_flowering_d6_ALL_qDTS8	AX-91101099	PZA01038.1	128743539	Founder_prob	Haplotype_probs
10.5015	6.60689	1.58948	F492	female_flowering_d6_ALL_qDTS8	AX-91101099	PZA01038.1	128743539	Founder_prob	Haplotype_probs
-10.1458	5.43143	-1.86798	ND245	female_flowering_d6_ALL_qDTS8	AX-91101099	PZA01038.1	128743539	Founder_prob	Haplotype_probs
17.9002	5.54344	3.22908	VA85	female_flowering_d6_ALL_qDTS8	AX-91101099	PZA01038.1	128743539	Founder_prob	Haplotype_probs
6.34986	5.10756	1.24323	B73_inra	female_flowering_d6_ALL_qDTS9	AX-91146091	AX-91146091	118776019	Founder_prob	Haplotype_probs
-12.9832	5.19493	-2.49921	A632_usa	female_flowering_d6_ALL_qDTS9	AX-91146091	AX-91146091	118776019	Founder_prob	Haplotype_probs
-8.37708	3.7577	-2.22931	CO255_inra	female_flowering_d6_ALL_qDTS9	AX-91146091	AX-91146091	118776019	Founder_prob	Haplotype_probs
-6.8633	4.62295	-1.48461	FV252_inra	female_flowering_d6_ALL_qDTS9	AX-91146091	AX-91146091	118776019	Founder_prob	Haplotype_probs
-0.223054	4.60741	-0.0484119	OH43_inra	female_flowering_d6_ALL_qDTS9	AX-91146091	AX-91146091	118776019	Founder_prob	Haplotype_probs
-2.37301	3.76145	-0.630875	A654_inra	female_flowering_d6_ALL_qDTS9	AX-91146091	AX-91146091	118776019	Founder_prob	Haplotype_probs
7.0616	5.02875	1.40425	FV2_inra	female_flowering_d6_ALL_qDTS9	AX-91146091	AX-91146091	118776019	Founder_prob	Haplotype_probs
-4.70253	5.99997	-0.783759	C103_inra	female_flowering_d6_ALL_qDTS9	AX-91146091	AX-91146091	118776019	Founder_prob	Haplotype_probs
4.74338	4.44758	1.06651	EP1_inra	female_flowering_d6_ALL_qDTS9	AX-91146091	AX-91146091	118776019	Founder_prob	Haplotype_probs
2.95119	3.86372	0.763821	D105_inra	female_flowering_d6_ALL_qDTS9	AX-91146091	AX-91146091	118776019	Founder_prob	Haplotype_probs
12.1947	4.1108	2.9665	W117_inra	female_flowering_d6_ALL_qDTS9	AX-91146091	AX-91146091	118776019	Founder_prob	Haplotype_probs
21.5879	5.27075	4.09579	B96	female_flowering_d6_ALL_qDTS9	AX-91146091	AX-91146091	118776019	Founder_prob	Haplotype_probs
-8.2131	4.75283	-1.72804	DK63	female_flowering_d6_ALL_qDTS9	AX-91146091	AX-91146091	118776019	Founder_prob	Haplotype_probs
5.27549	4.97523	1.06035	F492	female_flowering_d6_ALL_qDTS9	AX-91146091	AX-91146091	118776019	Founder_prob	Haplotype_probs
4.67202	8.9548	0.521734	ND245	female_flowering_d6_ALL_qDTS9	AX-91146091	AX-91146091	118776019	Founder_prob	Haplotype_probs
-12.9948	4.23758	-3.06656	VA85	female_flowering_d6_ALL_qDTS9	AX-91146091	AX-91146091	118776019	Founder_prob	Haplotype_probs
3.71849	5.89823	0.630442	B73_inra	female_flowering_d6_BLOIS_2014_OPT_qDTS3_2	AX-90590040	AX-90834914	160559346	Founder_prob	600K_SNP
-5.5152	6.83202	-0.807258	A632_usa	female_flowering_d6_BLOIS_2014_OPT_qDTS3_2	AX-90590040	AX-90834914	160559346	Founder_prob	600K_SNP
-13.8254	5.93381	-2.32994	CO255_inra	female_flowering_d6_BLOIS_2014_OPT_qDTS3_2	AX-90590040	AX-90834914	160559346	Founder_prob	600K_SNP
-27.2948	6.20827	-4.39652	FV252_inra	female_flowering_d6_BLOIS_2014_OPT_qDTS3_2	AX-90590040	AX-90834914	160559346	Founder_prob	600K_SNP
15.4978	4.24201	3.6534	OH43_inra	female_flowering_d6_BLOIS_2014_OPT_qDTS3_2	AX-90590040	AX-90834914	160559346	Founder_prob	600K_SNP
-5.43373	6.32087	-0.859648	A654_inra	female_flowering_d6_BLOIS_2014_OPT_qDTS3_2	AX-90590040	AX-90834914	160559346	Founder_prob	600K_SNP
-10.6507	5.16242	-2.06313	FV2_inra	female_flowering_d6_BLOIS_2014_OPT_qDTS3_2	AX-90590040	AX-90834914	160559346	Founder_prob	600K_SNP
3.52277	4.55056	0.774141	C103_inra	female_flowering_d6_BLOIS_2014_OPT_qDTS3_2	AX-90590040	AX-90834914	160559346	Founder_prob	600K_SNP
-22.5409	4.89284	-4.60691	EP1_inra	female_flowering_d6_BLOIS_2014_OPT_qDTS3_2	AX-90590040	AX-90834914	160559346	Founder_prob	600K_SNP
0.71535	6.21794	0.115046	D105_inra	female_flowering_d6_BLOIS_2014_OPT_qDTS3_2	AX-90590040	AX-90834914	160559346	Founder_prob	600K_SNP
2.14509	6.70601	0.319876	W117_inra	female_flowering_d6_BLOIS_2014_OPT_qDTS3_2	AX-90590040	AX-90834914	160559346	Founder_prob	600K_SNP
21.172	4.08289	5.18553	B96	female_flowering_d6_BLOIS_2014_OPT_qDTS3_2	AX-90590040	AX-90834914	160559346	Founder_prob	600K_SNP
4.54684	3.8757	1.17317	DK63	female_flowering_d6_BLOIS_2014_OPT_qDTS3_2	AX-90590040	AX-90834914	160559346	Founder_prob	600K_SNP
2.19213	4.49629	0.487541	F492	female_flowering_d6_BLOIS_2014_OPT_qDTS3_2	AX-90590040	AX-90834914	160559346	Founder_prob	600K_SNP
-7.05927	5.29731	-1.33261	ND245	female_flowering_d6_BLOIS_2014_OPT_qDTS3_2	AX-90590040	AX-90834914	160559346	Founder_prob	600K_SNP
3.50706	5.08191	0.690108	VA85	female_flowering_d6_BLOIS_2014_OPT_qDTS3_2	AX-90590040	AX-90834914	160559346	Founder_prob	600K_SNP
23.5839	4.21979	5.58887	B73_inra	female_flowering_d6_BLOIS_2014_OPT_qDTS8	AX-91100974	AX-91100867	128360587	Founder_prob	600K_SNP
1.69705	6.33495	0.267887	A632_usa	female_flowering_d6_BLOIS_2014_OPT_qDTS8	AX-91100974	AX-91100867	128360587	Founder_prob	600K_SNP
-3.94341	4.18209	-0.942927	CO255_inra	female_flowering_d6_BLOIS_2014_OPT_qDTS8	AX-91100974	AX-91100867	128360587	Founder_prob	600K_SNP
6.4513	4.8528	1.3294	FV252_inra	female_flowering_d6_BLOIS_2014_OPT_qDTS8	AX-91100974	AX-91100867	128360587	Founder_prob	600K_SNP
6.53444	7.35982	0.887852	OH43_inra	female_flowering_d6_BLOIS_2014_OPT_qDTS8	AX-91100974	AX-91100867	128360587	Founder_prob	600K_SNP
-7.31082	3.98206	-1.83594	A654_inra	female_flowering_d6_BLOIS_2014_OPT_qDTS8	AX-91100974	AX-91100867	128360587	Founder_prob	600K_SNP
-4.36361	4.65454	-0.937496	FV2_inra	female_flowering_d6_BLOIS_2014_OPT_qDTS8	AX-91100974	AX-91100867	128360587	Founder_prob	600K_SNP
2.34432	6.4227	0.365005	C103_inra	female_flowering_d6_BLOIS_2014_OPT_qDTS8	AX-91100974	AX-91100867	128360587	Founder_prob	600K_SNP
-16.7486	5.87166	-2.85245	EP1_inra	female_flowering_d6_BLOIS_2014_OPT_qDTS8	AX-91100974	AX-91100867	128360587	Founder_prob	600K_SNP
-15.5337	4.45555	-3.48639	D105_inra	female_flowering_d6_BLOIS_2014_OPT_qDTS8	AX-91100974	AX-91100867	128360587	Founder_prob	600K_SNP
1.56638	5.08597	0.307981	W117_inra	female_flowering_d6_BLOIS_2014_OPT_qDTS8	AX-91100974	AX-91100867	128360587	Founder_prob	600K_SNP
12.7927	6.96257	1.83735	B96	female_flowering_d6_BLOIS_2014_OPT_qDTS8	AX-91100974	AX-91100867	128360587	Founder_prob	600K_SNP
-8.61843	5.35437	-1.60961	DK63	female_flowering_d6_BLOIS_2014_OPT_qDTS8	AX-91100974	AX-91100867	128360587	Founder_prob	600K_SNP
7.49919	7.12874	1.05197	F492	female_flowering_d6_BLOIS_2014_OPT_qDTS8	AX-91100974	AX-91100867	128360587	Founder_prob	600K_SNP
-14.6403	6.03229	-2.42699	ND245	female_flowering_d6_BLOIS_2014_OPT_qDTS8	AX-91100974	AX-91100867	128360587	Founder_prob	600K_SNP
14.2862	5.93214	2.40828	VA85	female_flowering_d6_BLOIS_2014_OPT_qDTS8	AX-91100974	AX-91100867	128360587	Founder_prob	600K_SNP
3.71849	5.89823	0.630442	B73_inra	female_flowering_d6_BLOIS_2014_OPT_qDTS3_2	AX-90834914	AX-90834914	160426458	Founder_prob	Founder_probs
-5.5152	6.83202	-0.807258	A632_usa	female_flowering_d6_BLOIS_2014_OPT_qDTS3_2	AX-90834914	AX-90834914	160426458	Founder_prob	Founder_probs
-13.8254	5.93381	-2.32994	CO255_inra	female_flowering_d6_BLOIS_2014_OPT_qDTS3_2	AX-90834914	AX-90834914	160426458	Founder_prob	Founder_probs
-27.2948	6.20827	-4.39652	FV252_inra	female_flowering_d6_BLOIS_2014_OPT_qDTS3_2	AX-90834914	AX-90834914	160426458	Founder_prob	Founder_probs
15.4978	4.24201	3.6534	OH43_inra	female_flowering_d6_BLOIS_2014_OPT_qDTS3_2	AX-90834914	AX-90834914	160426458	Founder_prob	Founder_probs
-5.43373	6.32087	-0.859648	A654_inra	female_flowering_d6_BLOIS_2014_OPT_qDTS3_2	AX-90834914	AX-90834914	160426458	Founder_prob	Founder_probs
-10.6507	5.16242	-2.06313	FV2_inra	female_flowering_d6_BLOIS_2014_OPT_qDTS3_2	AX-90834914	AX-90834914	160426458	Founder_prob	Founder_probs
3.52277	4.55056	0.774141	C103_inra	female_flowering_d6_BLOIS_2014_OPT_qDTS3_2	AX-90834914	AX-90834914	160426458	Founder_prob	Founder_probs
-22.5409	4.89284	-4.60691	EP1_inra	female_flowering_d6_BLOIS_2014_OPT_qDTS3_2	AX-90834914	AX-90834914	160426458	Founder_prob	Founder_probs
0.71535	6.21794	0.115046	D105_inra	female_flowering_d6_BLOIS_2014_OPT_qDTS3_2	AX-90834914	AX-90834914	160426458	Founder_prob	Founder_probs
2.14509	6.70601	0.319876	W117_inra	female_flowering_d6_BLOIS_2014_OPT_qDTS3_2	AX-90834914	AX-90834914	160426458	Founder_prob	Founder_probs
21.172	4.08289	5.18553	B96	female_flowering_d6_BLOIS_2014_OPT_qDTS3_2	AX-90834914	AX-90834914	160426458	Founder_prob	Founder_probs
4.54684	3.8757	1.17317	DK63	female_flowering_d6_BLOIS_2014_OPT_qDTS3_2	AX-90834914	AX-90834914	160426458	Founder_prob	Founder_probs
2.19213	4.49629	0.487541	F492	female_flowering_d6_BLOIS_2014_OPT_qDTS3_2	AX-90834914	AX-90834914	160426458	Founder_prob	Founder_probs
-7.05927	5.29731	-1.33261	ND245	female_flowering_d6_BLOIS_2014_OPT_qDTS3_2	AX-90834914	AX-90834914	160426458	Founder_prob	Founder_probs
3.50706	5.08191	0.690108	VA85	female_flowering_d6_BLOIS_2014_OPT_qDTS3_2	AX-90834914	AX-90834914	160426458	Founder_prob	Founder_probs
22.8554	4.15443	5.50145	B73_inra	female_flowering_d6_BLOIS_2014_OPT_qDTS8	PZA01038.1	PZA01038.1	128420026	Founder_prob	Founder_probs
2.29278	6.24017	0.367423	A632_usa	female_flowering_d6_BLOIS_2014_OPT_qDTS8	PZA01038.1	PZA01038.1	128420026	Founder_prob	Founder_probs
-5.94494	3.94221	-1.50802	CO255_inra	female_flowering_d6_BLOIS_2014_OPT_qDTS8	PZA01038.1	PZA01038.1	128420026	Founder_prob	Founder_probs
6.35151	4.76994	1.33157	FV252_inra	female_flowering_d6_BLOIS_2014_OPT_qDTS8	PZA01038.1	PZA01038.1	128420026	Founder_prob	Founder_probs
12.799	7.75378	1.65068	OH43_inra	female_flowering_d6_BLOIS_2014_OPT_qDTS8	PZA01038.1	PZA01038.1	128420026	Founder_prob	Founder_probs
-6.66155	4.15859	-1.60188	A654_inra	female_flowering_d6_BLOIS_2014_OPT_qDTS8	PZA01038.1	PZA01038.1	128420026	Founder_prob	Founder_probs
-5.3772	4.43837	-1.21153	FV2_inra	female_flowering_d6_BLOIS_2014_OPT_qDTS8	PZA01038.1	PZA01038.1	128420026	Founder_prob	Founder_probs
0.930514	6.08656	0.15288	C103_inra	female_flowering_d6_BLOIS_2014_OPT_qDTS8	PZA01038.1	PZA01038.1	128420026	Founder_prob	Founder_probs
-16.4584	5.77789	-2.84852	EP1_inra	female_flowering_d6_BLOIS_2014_OPT_qDTS8	PZA01038.1	PZA01038.1	128420026	Founder_prob	Founder_probs
-16.3332	4.26273	-3.83163	D105_inra	female_flowering_d6_BLOIS_2014_OPT_qDTS8	PZA01038.1	PZA01038.1	128420026	Founder_prob	Founder_probs
-0.00179862	5.05391	-0.000355886	W117_inra	female_flowering_d6_BLOIS_2014_OPT_qDTS8	PZA01038.1	PZA01038.1	128420026	Founder_prob	Founder_probs
12.6191	6.86166	1.83907	B96	female_flowering_d6_BLOIS_2014_OPT_qDTS8	PZA01038.1	PZA01038.1	128420026	Founder_prob	Founder_probs
-8.58394	5.27625	-1.6269	DK63	female_flowering_d6_BLOIS_2014_OPT_qDTS8	PZA01038.1	PZA01038.1	128420026	Founder_prob	Founder_probs
12.1793	7.24591	1.68086	F492	female_flowering_d6_BLOIS_2014_OPT_qDTS8	PZA01038.1	PZA01038.1	128420026	Founder_prob	Founder_probs
-12.8078	6.09687	-2.10071	ND245	female_flowering_d6_BLOIS_2014_OPT_qDTS8	PZA01038.1	PZA01038.1	128420026	Founder_prob	Founder_probs
17.2163	6.06562	2.83834	VA85	female_flowering_d6_BLOIS_2014_OPT_qDTS8	PZA01038.1	PZA01038.1	128420026	Founder_prob	Founder_probs
4.157	5.34936	0.777104	B73_inra	female_flowering_d6_BLOIS_2014_OPT_qDTS9	AX-91146185	AX-91146185	119413544	Founder_prob	Founder_probs
-18.7926	5.84209	-3.21675	A632_usa	female_flowering_d6_BLOIS_2014_OPT_qDTS9	AX-91146185	AX-91146185	119413544	Founder_prob	Founder_probs
-14.0065	4.35596	-3.21549	CO255_inra	female_flowering_d6_BLOIS_2014_OPT_qDTS9	AX-91146185	AX-91146185	119413544	Founder_prob	Founder_probs
-4.1893	4.99784	-0.838222	FV252_inra	female_flowering_d6_BLOIS_2014_OPT_qDTS9	AX-91146185	AX-91146185	119413544	Founder_prob	Founder_probs
2.84432	5.05542	0.562628	OH43_inra	female_flowering_d6_BLOIS_2014_OPT_qDTS9	AX-91146185	AX-91146185	119413544	Founder_prob	Founder_probs
-4.97883	4.09757	-1.21507	A654_inra	female_flowering_d6_BLOIS_2014_OPT_qDTS9	AX-91146185	AX-91146185	119413544	Founder_prob	Founder_probs
11.0442	6.07092	1.8192	FV2_inra	female_flowering_d6_BLOIS_2014_OPT_qDTS9	AX-91146185	AX-91146185	119413544	Founder_prob	Founder_probs
13.4029	7.07368	1.89476	C103_inra	female_flowering_d6_BLOIS_2014_OPT_qDTS9	AX-91146185	AX-91146185	119413544	Founder_prob	Founder_probs
1.02701	5.19258	0.197785	EP1_inra	female_flowering_d6_BLOIS_2014_OPT_qDTS9	AX-91146185	AX-91146185	119413544	Founder_prob	Founder_probs
9.01276	4.20742	2.14211	D105_inra	female_flowering_d6_BLOIS_2014_OPT_qDTS9	AX-91146185	AX-91146185	119413544	Founder_prob	Founder_probs
12.5253	4.43243	2.82583	W117_inra	female_flowering_d6_BLOIS_2014_OPT_qDTS9	AX-91146185	AX-91146185	119413544	Founder_prob	Founder_probs
16.8653	5.42308	3.10991	B96	female_flowering_d6_BLOIS_2014_OPT_qDTS9	AX-91146185	AX-91146185	119413544	Founder_prob	Founder_probs
-11.2377	5.31188	-2.11558	DK63	female_flowering_d6_BLOIS_2014_OPT_qDTS9	AX-91146185	AX-91146185	119413544	Founder_prob	Founder_probs
5.72527	5.33641	1.07287	F492	female_flowering_d6_BLOIS_2014_OPT_qDTS9	AX-91146185	AX-91146185	119413544	Founder_prob	Founder_probs
4.42726	9.95587	0.444689	ND245	female_flowering_d6_BLOIS_2014_OPT_qDTS9	AX-91146185	AX-91146185	119413544	Founder_prob	Founder_probs
-11.9456	4.55948	-2.61995	VA85	female_flowering_d6_BLOIS_2014_OPT_qDTS9	AX-91146185	AX-91146185	119413544	Founder_prob	Founder_probs
0.903871	5.52609	0.163564	B73_inra	female_flowering_d6_BLOIS_2014_OPT_qDTS3_2	AX-90834861	AX-90834820	160277722	Founder_prob	Haplotype_probs
-5.43323	6.60385	-0.822736	A632_usa	female_flowering_d6_BLOIS_2014_OPT_qDTS3_2	AX-90834861	AX-90834820	160277722	Founder_prob	Haplotype_probs
-12.5403	6.15409	-2.03772	CO255_inra	female_flowering_d6_BLOIS_2014_OPT_qDTS3_2	AX-90834861	AX-90834820	160277722	Founder_prob	Haplotype_probs
-26.5221	6.2027	-4.2759	FV252_inra	female_flowering_d6_BLOIS_2014_OPT_qDTS3_2	AX-90834861	AX-90834820	160277722	Founder_prob	Haplotype_probs
16.9678	4.47628	3.7906	OH43_inra	female_flowering_d6_BLOIS_2014_OPT_qDTS3_2	AX-90834861	AX-90834820	160277722	Founder_prob	Haplotype_probs
-8.35538	6.59415	-1.26709	A654_inra	female_flowering_d6_BLOIS_2014_OPT_qDTS3_2	AX-90834861	AX-90834820	160277722	Founder_prob	Haplotype_probs
-10.1246	5.04874	-2.00538	FV2_inra	female_flowering_d6_BLOIS_2014_OPT_qDTS3_2	AX-90834861	AX-90834820	160277722	Founder_prob	Haplotype_probs
2.94011	4.62377	0.635868	C103_inra	female_flowering_d6_BLOIS_2014_OPT_qDTS3_2	AX-90834861	AX-90834820	160277722	Founder_prob	Haplotype_probs
-18.7423	4.57568	-4.09607	EP1_inra	female_flowering_d6_BLOIS_2014_OPT_qDTS3_2	AX-90834861	AX-90834820	160277722	Founder_prob	Haplotype_probs
1.11522	6.21934	0.179315	D105_inra	female_flowering_d6_BLOIS_2014_OPT_qDTS3_2	AX-90834861	AX-90834820	160277722	Founder_prob	Haplotype_probs
1.90244	6.65743	0.285762	W117_inra	female_flowering_d6_BLOIS_2014_OPT_qDTS3_2	AX-90834861	AX-90834820	160277722	Founder_prob	Haplotype_probs
21.4072	3.99546	5.35788	B96	female_flowering_d6_BLOIS_2014_OPT_qDTS3_2	AX-90834861	AX-90834820	160277722	Founder_prob	Haplotype_probs
3.31382	3.94433	0.840149	DK63	female_flowering_d6_BLOIS_2014_OPT_qDTS3_2	AX-90834861	AX-90834820	160277722	Founder_prob	Haplotype_probs
3.89587	4.50492	0.864802	F492	female_flowering_d6_BLOIS_2014_OPT_qDTS3_2	AX-90834861	AX-90834820	160277722	Founder_prob	Haplotype_probs
-6.76501	5.29923	-1.2766	ND245	female_flowering_d6_BLOIS_2014_OPT_qDTS3_2	AX-90834861	AX-90834820	160277722	Founder_prob	Haplotype_probs
3.48688	5.09538	0.684322	VA85	female_flowering_d6_BLOIS_2014_OPT_qDTS3_2	AX-90834861	AX-90834820	160277722	Founder_prob	Haplotype_probs
22.8554	4.15443	5.50145	B73_inra	female_flowering_d6_BLOIS_2014_OPT_qDTS8	AX-91442756	PZA01038.1	130607082	Founder_prob	Haplotype_probs
2.29278	6.24017	0.367423	A632_usa	female_flowering_d6_BLOIS_2014_OPT_qDTS8	AX-91442756	PZA01038.1	130607082	Founder_prob	Haplotype_probs
-5.94494	3.94221	-1.50802	CO255_inra	female_flowering_d6_BLOIS_2014_OPT_qDTS8	AX-91442756	PZA01038.1	130607082	Founder_prob	Haplotype_probs
6.35151	4.76994	1.33157	FV252_inra	female_flowering_d6_BLOIS_2014_OPT_qDTS8	AX-91442756	PZA01038.1	130607082	Founder_prob	Haplotype_probs
12.799	7.75378	1.65068	OH43_inra	female_flowering_d6_BLOIS_2014_OPT_qDTS8	AX-91442756	PZA01038.1	130607082	Founder_prob	Haplotype_probs
-6.66155	4.15859	-1.60188	A654_inra	female_flowering_d6_BLOIS_2014_OPT_qDTS8	AX-91442756	PZA01038.1	130607082	Founder_prob	Haplotype_probs
-5.3772	4.43837	-1.21153	FV2_inra	female_flowering_d6_BLOIS_2014_OPT_qDTS8	AX-91442756	PZA01038.1	130607082	Founder_prob	Haplotype_probs
0.930514	6.08656	0.15288	C103_inra	female_flowering_d6_BLOIS_2014_OPT_qDTS8	AX-91442756	PZA01038.1	130607082	Founder_prob	Haplotype_probs
-16.4584	5.77789	-2.84852	EP1_inra	female_flowering_d6_BLOIS_2014_OPT_qDTS8	AX-91442756	PZA01038.1	130607082	Founder_prob	Haplotype_probs
-16.3332	4.26273	-3.83163	D105_inra	female_flowering_d6_BLOIS_2014_OPT_qDTS8	AX-91442756	PZA01038.1	130607082	Founder_prob	Haplotype_probs
-0.00179862	5.05391	-0.000355886	W117_inra	female_flowering_d6_BLOIS_2014_OPT_qDTS8	AX-91442756	PZA01038.1	130607082	Founder_prob	Haplotype_probs
12.6191	6.86166	1.83907	B96	female_flowering_d6_BLOIS_2014_OPT_qDTS8	AX-91442756	PZA01038.1	130607082	Founder_prob	Haplotype_probs
-8.58394	5.27625	-1.6269	DK63	female_flowering_d6_BLOIS_2014_OPT_qDTS8	AX-91442756	PZA01038.1	130607082	Founder_prob	Haplotype_probs
12.1793	7.24591	1.68086	F492	female_flowering_d6_BLOIS_2014_OPT_qDTS8	AX-91442756	PZA01038.1	130607082	Founder_prob	Haplotype_probs
-12.8078	6.09687	-2.10071	ND245	female_flowering_d6_BLOIS_2014_OPT_qDTS8	AX-91442756	PZA01038.1	130607082	Founder_prob	Haplotype_probs
17.2163	6.06562	2.83834	VA85	female_flowering_d6_BLOIS_2014_OPT_qDTS8	AX-91442756	PZA01038.1	130607082	Founder_prob	Haplotype_probs
5.41244	5.39185	1.00382	B73_inra	female_flowering_d6_BLOIS_2014_OPT_qDTS9	AX-91800534	AX-91146531	120969378	Founder_prob	Haplotype_probs
-19.08	5.83804	-3.26821	A632_usa	female_flowering_d6_BLOIS_2014_OPT_qDTS9	AX-91800534	AX-91146531	120969378	Founder_prob	Haplotype_probs
-14.1244	4.35095	-3.24627	CO255_inra	female_flowering_d6_BLOIS_2014_OPT_qDTS9	AX-91800534	AX-91146531	120969378	Founder_prob	Haplotype_probs
-2.10099	5.17014	-0.406371	FV252_inra	female_flowering_d6_BLOIS_2014_OPT_qDTS9	AX-91800534	AX-91146531	120969378	Founder_prob	Haplotype_probs
2.84863	5.00864	0.568744	OH43_inra	female_flowering_d6_BLOIS_2014_OPT_qDTS9	AX-91800534	AX-91146531	120969378	Founder_prob	Haplotype_probs
-4.88883	4.08249	-1.19751	A654_inra	female_flowering_d6_BLOIS_2014_OPT_qDTS9	AX-91800534	AX-91146531	120969378	Founder_prob	Haplotype_probs
10.4987	5.60614	1.87271	FV2_inra	female_flowering_d6_BLOIS_2014_OPT_qDTS9	AX-91800534	AX-91146531	120969378	Founder_prob	Haplotype_probs
13.488	7.07037	1.90768	C103_inra	female_flowering_d6_BLOIS_2014_OPT_qDTS9	AX-91800534	AX-91146531	120969378	Founder_prob	Haplotype_probs
-1.88449	5.86048	-0.32156	EP1_inra	female_flowering_d6_BLOIS_2014_OPT_qDTS9	AX-91800534	AX-91146531	120969378	Founder_prob	Haplotype_probs
9.82871	4.27332	2.30002	D105_inra	female_flowering_d6_BLOIS_2014_OPT_qDTS9	AX-91800534	AX-91146531	120969378	Founder_prob	Haplotype_probs
11.3646	4.27559	2.65802	W117_inra	female_flowering_d6_BLOIS_2014_OPT_qDTS9	AX-91800534	AX-91146531	120969378	Founder_prob	Haplotype_probs
16.5442	5.40562	3.06056	B96	female_flowering_d6_BLOIS_2014_OPT_qDTS9	AX-91800534	AX-91146531	120969378	Founder_prob	Haplotype_probs
-11.3247	5.30825	-2.13341	DK63	female_flowering_d6_BLOIS_2014_OPT_qDTS9	AX-91800534	AX-91146531	120969378	Founder_prob	Haplotype_probs
4.80631	5.07277	0.947472	F492	female_flowering_d6_BLOIS_2014_OPT_qDTS9	AX-91800534	AX-91146531	120969378	Founder_prob	Haplotype_probs
0.175846	9.99084	0.0176007	ND245	female_flowering_d6_BLOIS_2014_OPT_qDTS9	AX-91800534	AX-91146531	120969378	Founder_prob	Haplotype_probs
-11.9897	4.56245	-2.6279	VA85	female_flowering_d6_BLOIS_2014_OPT_qDTS9	AX-91800534	AX-91146531	120969378	Founder_prob	Haplotype_probs
8.0576	4.52621	1.78021	B73_inra	female_flowering_d6_BLOIS_2017_OPT_qDTS8	PZE-108089600	AX-91772552	150981849	Founder_prob	600K_SNP
12.4074	5.02693	2.46819	A632_usa	female_flowering_d6_BLOIS_2017_OPT_qDTS8	PZE-108089600	AX-91772552	150981849	Founder_prob	600K_SNP
-6.12154	4.83285	-1.26665	CO255_inra	female_flowering_d6_BLOIS_2017_OPT_qDTS8	PZE-108089600	AX-91772552	150981849	Founder_prob	600K_SNP
1.36681	6.33935	0.215607	FV252_inra	female_flowering_d6_BLOIS_2017_OPT_qDTS8	PZE-108089600	AX-91772552	150981849	Founder_prob	600K_SNP
7.04375	5.47183	1.28727	OH43_inra	female_flowering_d6_BLOIS_2017_OPT_qDTS8	PZE-108089600	AX-91772552	150981849	Founder_prob	600K_SNP
-9.20145	5.06029	-1.81836	A654_inra	female_flowering_d6_BLOIS_2017_OPT_qDTS8	PZE-108089600	AX-91772552	150981849	Founder_prob	600K_SNP
3.00253	4.34944	0.690326	FV2_inra	female_flowering_d6_BLOIS_2017_OPT_qDTS8	PZE-108089600	AX-91772552	150981849	Founder_prob	600K_SNP
9.85964	6.89333	1.43031	C103_inra	female_flowering_d6_BLOIS_2017_OPT_qDTS8	PZE-108089600	AX-91772552	150981849	Founder_prob	600K_SNP
-19.7352	6.50387	-3.03437	EP1_inra	female_flowering_d6_BLOIS_2017_OPT_qDTS8	PZE-108089600	AX-91772552	150981849	Founder_prob	600K_SNP
-12.0097	4.28479	-2.80287	D105_inra	female_flowering_d6_BLOIS_2017_OPT_qDTS8	PZE-108089600	AX-91772552	150981849	Founder_prob	600K_SNP
-13.657	5.6632	-2.41154	W117_inra	female_flowering_d6_BLOIS_2017_OPT_qDTS8	PZE-108089600	AX-91772552	150981849	Founder_prob	600K_SNP
22.2579	9.5096	2.34058	B96	female_flowering_d6_BLOIS_2017_OPT_qDTS8	PZE-108089600	AX-91772552	150981849	Founder_prob	600K_SNP
-5.86429	4.77041	-1.22931	DK63	female_flowering_d6_BLOIS_2017_OPT_qDTS8	PZE-108089600	AX-91772552	150981849	Founder_prob	600K_SNP
5.00611	7.81405	0.640654	F492	female_flowering_d6_BLOIS_2017_OPT_qDTS8	PZE-108089600	AX-91772552	150981849	Founder_prob	600K_SNP
6.13139	8.76628	0.699429	ND245	female_flowering_d6_BLOIS_2017_OPT_qDTS8	PZE-108089600	AX-91772552	150981849	Founder_prob	600K_SNP
12.3505	5.54767	2.22625	VA85	female_flowering_d6_BLOIS_2017_OPT_qDTS8	PZE-108089600	AX-91772552	150981849	Founder_prob	600K_SNP
-0.790986	6.26717	-0.126211	B73_inra	female_flowering_d6_BLOIS_2017_OPT_qDTS3_2	AX-90834914	AX-90834914	160426458	Founder_prob	Founder_probs
9.3904	7.39471	1.26988	A632_usa	female_flowering_d6_BLOIS_2017_OPT_qDTS3_2	AX-90834914	AX-90834914	160426458	Founder_prob	Founder_probs
-19.8421	6.71176	-2.95632	CO255_inra	female_flowering_d6_BLOIS_2017_OPT_qDTS3_2	AX-90834914	AX-90834914	160426458	Founder_prob	Founder_probs
-16.5469	6.68562	-2.47499	FV252_inra	female_flowering_d6_BLOIS_2017_OPT_qDTS3_2	AX-90834914	AX-90834914	160426458	Founder_prob	Founder_probs
9.54371	4.61093	2.0698	OH43_inra	female_flowering_d6_BLOIS_2017_OPT_qDTS3_2	AX-90834914	AX-90834914	160426458	Founder_prob	Founder_probs
-10.7889	7.05741	-1.52874	A654_inra	female_flowering_d6_BLOIS_2017_OPT_qDTS3_2	AX-90834914	AX-90834914	160426458	Founder_prob	Founder_probs
-3.93722	5.15367	-0.763965	FV2_inra	female_flowering_d6_BLOIS_2017_OPT_qDTS3_2	AX-90834914	AX-90834914	160426458	Founder_prob	Founder_probs
-4.05016	4.88345	-0.829364	C103_inra	female_flowering_d6_BLOIS_2017_OPT_qDTS3_2	AX-90834914	AX-90834914	160426458	Founder_prob	Founder_probs
-19.9131	5.06192	-3.9339	EP1_inra	female_flowering_d6_BLOIS_2017_OPT_qDTS3_2	AX-90834914	AX-90834914	160426458	Founder_prob	Founder_probs
8.16355	6.43577	1.26847	D105_inra	female_flowering_d6_BLOIS_2017_OPT_qDTS3_2	AX-90834914	AX-90834914	160426458	Founder_prob	Founder_probs
6.19766	6.84761	0.905084	W117_inra	female_flowering_d6_BLOIS_2017_OPT_qDTS3_2	AX-90834914	AX-90834914	160426458	Founder_prob	Founder_probs
15.8956	4.20314	3.78185	B96	female_flowering_d6_BLOIS_2017_OPT_qDTS3_2	AX-90834914	AX-90834914	160426458	Founder_prob	Founder_probs
5.13252	4.04385	1.26922	DK63	female_flowering_d6_BLOIS_2017_OPT_qDTS3_2	AX-90834914	AX-90834914	160426458	Founder_prob	Founder_probs
4.32567	4.93538	0.876461	F492	female_flowering_d6_BLOIS_2017_OPT_qDTS3_2	AX-90834914	AX-90834914	160426458	Founder_prob	Founder_probs
0.268989	5.63339	0.0477491	ND245	female_flowering_d6_BLOIS_2017_OPT_qDTS3_2	AX-90834914	AX-90834914	160426458	Founder_prob	Founder_probs
-3.9591	5.46157	-0.724901	VA85	female_flowering_d6_BLOIS_2017_OPT_qDTS3_2	AX-90834914	AX-90834914	160426458	Founder_prob	Founder_probs
8.53798	4.28439	1.99281	B73_inra	female_flowering_d6_BLOIS_2017_OPT_qDTS8	AX-91771730	AX-91771730	146686920	Founder_prob	Founder_probs
10.7388	4.72998	2.27038	A632_usa	female_flowering_d6_BLOIS_2017_OPT_qDTS8	AX-91771730	AX-91771730	146686920	Founder_prob	Founder_probs
-7.69394	4.46141	-1.72455	CO255_inra	female_flowering_d6_BLOIS_2017_OPT_qDTS8	AX-91771730	AX-91771730	146686920	Founder_prob	Founder_probs
4.73726	5.09234	0.930273	FV252_inra	female_flowering_d6_BLOIS_2017_OPT_qDTS8	AX-91771730	AX-91771730	146686920	Founder_prob	Founder_probs
18.8518	5.28079	3.56988	OH43_inra	female_flowering_d6_BLOIS_2017_OPT_qDTS8	AX-91771730	AX-91771730	146686920	Founder_prob	Founder_probs
-5.58573	4.77684	-1.16933	A654_inra	female_flowering_d6_BLOIS_2017_OPT_qDTS8	AX-91771730	AX-91771730	146686920	Founder_prob	Founder_probs
-4.91267	5.1345	-0.956797	FV2_inra	female_flowering_d6_BLOIS_2017_OPT_qDTS8	AX-91771730	AX-91771730	146686920	Founder_prob	Founder_probs
0.488558	5.88242	0.083054	C103_inra	female_flowering_d6_BLOIS_2017_OPT_qDTS8	AX-91771730	AX-91771730	146686920	Founder_prob	Founder_probs
-17.8701	5.80427	-3.07879	EP1_inra	female_flowering_d6_BLOIS_2017_OPT_qDTS8	AX-91771730	AX-91771730	146686920	Founder_prob	Founder_probs
-13.1638	4.3269	-3.04232	D105_inra	female_flowering_d6_BLOIS_2017_OPT_qDTS8	AX-91771730	AX-91771730	146686920	Founder_prob	Founder_probs
-16.2482	5.54943	-2.92791	W117_inra	female_flowering_d6_BLOIS_2017_OPT_qDTS8	AX-91771730	AX-91771730	146686920	Founder_prob	Founder_probs
30.5368	9.13666	3.34223	B96	female_flowering_d6_BLOIS_2017_OPT_qDTS8	AX-91771730	AX-91771730	146686920	Founder_prob	Founder_probs
-8.17923	4.43225	-1.84539	DK63	female_flowering_d6_BLOIS_2017_OPT_qDTS8	AX-91771730	AX-91771730	146686920	Founder_prob	Founder_probs
6.07757	7.13783	0.85146	F492	female_flowering_d6_BLOIS_2017_OPT_qDTS8	AX-91771730	AX-91771730	146686920	Founder_prob	Founder_probs
10.3219	8.42339	1.22538	ND245	female_flowering_d6_BLOIS_2017_OPT_qDTS8	AX-91771730	AX-91771730	146686920	Founder_prob	Founder_probs
14.3184	5.21847	2.74379	VA85	female_flowering_d6_BLOIS_2017_OPT_qDTS8	AX-91771730	AX-91771730	146686920	Founder_prob	Founder_probs
-0.790986	6.26717	-0.126211	B73_inra	female_flowering_d6_BLOIS_2017_OPT_qDTS3_2	AX-90834914	AX-90834914	160426458	Founder_prob	Haplotype_probs
9.3904	7.39471	1.26988	A632_usa	female_flowering_d6_BLOIS_2017_OPT_qDTS3_2	AX-90834914	AX-90834914	160426458	Founder_prob	Haplotype_probs
-19.8421	6.71176	-2.95632	CO255_inra	female_flowering_d6_BLOIS_2017_OPT_qDTS3_2	AX-90834914	AX-90834914	160426458	Founder_prob	Haplotype_probs
-16.5469	6.68562	-2.47499	FV252_inra	female_flowering_d6_BLOIS_2017_OPT_qDTS3_2	AX-90834914	AX-90834914	160426458	Founder_prob	Haplotype_probs
9.54371	4.61093	2.0698	OH43_inra	female_flowering_d6_BLOIS_2017_OPT_qDTS3_2	AX-90834914	AX-90834914	160426458	Founder_prob	Haplotype_probs
-10.7889	7.05741	-1.52874	A654_inra	female_flowering_d6_BLOIS_2017_OPT_qDTS3_2	AX-90834914	AX-90834914	160426458	Founder_prob	Haplotype_probs
-3.93722	5.15367	-0.763965	FV2_inra	female_flowering_d6_BLOIS_2017_OPT_qDTS3_2	AX-90834914	AX-90834914	160426458	Founder_prob	Haplotype_probs
-4.05016	4.88345	-0.829364	C103_inra	female_flowering_d6_BLOIS_2017_OPT_qDTS3_2	AX-90834914	AX-90834914	160426458	Founder_prob	Haplotype_probs
-19.9131	5.06192	-3.9339	EP1_inra	female_flowering_d6_BLOIS_2017_OPT_qDTS3_2	AX-90834914	AX-90834914	160426458	Founder_prob	Haplotype_probs
8.16355	6.43577	1.26847	D105_inra	female_flowering_d6_BLOIS_2017_OPT_qDTS3_2	AX-90834914	AX-90834914	160426458	Founder_prob	Haplotype_probs
6.19766	6.84761	0.905084	W117_inra	female_flowering_d6_BLOIS_2017_OPT_qDTS3_2	AX-90834914	AX-90834914	160426458	Founder_prob	Haplotype_probs
15.8956	4.20314	3.78185	B96	female_flowering_d6_BLOIS_2017_OPT_qDTS3_2	AX-90834914	AX-90834914	160426458	Founder_prob	Haplotype_probs
5.13252	4.04385	1.26922	DK63	female_flowering_d6_BLOIS_2017_OPT_qDTS3_2	AX-90834914	AX-90834914	160426458	Founder_prob	Haplotype_probs
4.32567	4.93538	0.876461	F492	female_flowering_d6_BLOIS_2017_OPT_qDTS3_2	AX-90834914	AX-90834914	160426458	Founder_prob	Haplotype_probs
0.268989	5.63339	0.0477491	ND245	female_flowering_d6_BLOIS_2017_OPT_qDTS3_2	AX-90834914	AX-90834914	160426458	Founder_prob	Haplotype_probs
-3.9591	5.46157	-0.724901	VA85	female_flowering_d6_BLOIS_2017_OPT_qDTS3_2	AX-90834914	AX-90834914	160426458	Founder_prob	Haplotype_probs
8.53798	4.28439	1.99281	B73_inra	female_flowering_d6_BLOIS_2017_OPT_qDTS8	AX-91106528	AX-91771730	148924506	Founder_prob	Haplotype_probs
10.7388	4.72998	2.27038	A632_usa	female_flowering_d6_BLOIS_2017_OPT_qDTS8	AX-91106528	AX-91771730	148924506	Founder_prob	Haplotype_probs
-7.69394	4.46141	-1.72455	CO255_inra	female_flowering_d6_BLOIS_2017_OPT_qDTS8	AX-91106528	AX-91771730	148924506	Founder_prob	Haplotype_probs
4.73726	5.09234	0.930273	FV252_inra	female_flowering_d6_BLOIS_2017_OPT_qDTS8	AX-91106528	AX-91771730	148924506	Founder_prob	Haplotype_probs
18.8518	5.28079	3.56988	OH43_inra	female_flowering_d6_BLOIS_2017_OPT_qDTS8	AX-91106528	AX-91771730	148924506	Founder_prob	Haplotype_probs
-5.58573	4.77684	-1.16933	A654_inra	female_flowering_d6_BLOIS_2017_OPT_qDTS8	AX-91106528	AX-91771730	148924506	Founder_prob	Haplotype_probs
-4.91267	5.1345	-0.956797	FV2_inra	female_flowering_d6_BLOIS_2017_OPT_qDTS8	AX-91106528	AX-91771730	148924506	Founder_prob	Haplotype_probs
0.488558	5.88242	0.083054	C103_inra	female_flowering_d6_BLOIS_2017_OPT_qDTS8	AX-91106528	AX-91771730	148924506	Founder_prob	Haplotype_probs
-17.8701	5.80427	-3.07879	EP1_inra	female_flowering_d6_BLOIS_2017_OPT_qDTS8	AX-91106528	AX-91771730	148924506	Founder_prob	Haplotype_probs
-13.1638	4.3269	-3.04232	D105_inra	female_flowering_d6_BLOIS_2017_OPT_qDTS8	AX-91106528	AX-91771730	148924506	Founder_prob	Haplotype_probs
-16.2482	5.54943	-2.92791	W117_inra	female_flowering_d6_BLOIS_2017_OPT_qDTS8	AX-91106528	AX-91771730	148924506	Founder_prob	Haplotype_probs
30.5368	9.13666	3.34223	B96	female_flowering_d6_BLOIS_2017_OPT_qDTS8	AX-91106528	AX-91771730	148924506	Founder_prob	Haplotype_probs
-8.17923	4.43225	-1.84539	DK63	female_flowering_d6_BLOIS_2017_OPT_qDTS8	AX-91106528	AX-91771730	148924506	Founder_prob	Haplotype_probs
6.07757	7.13783	0.85146	F492	female_flowering_d6_BLOIS_2017_OPT_qDTS8	AX-91106528	AX-91771730	148924506	Founder_prob	Haplotype_probs
10.3219	8.42339	1.22538	ND245	female_flowering_d6_BLOIS_2017_OPT_qDTS8	AX-91106528	AX-91771730	148924506	Founder_prob	Haplotype_probs
14.3184	5.21847	2.74379	VA85	female_flowering_d6_BLOIS_2017_OPT_qDTS8	AX-91106528	AX-91771730	148924506	Founder_prob	Haplotype_probs
10.9626	6.6709	1.64335	B73_inra	female_flowering_d6_GRANEROS_2015_OPT_qDTS3_2	AX-90835099	AX-90835093	161296968	Founder_prob	600K_SNP
-6.01364	8.31246	-0.723449	A632_usa	female_flowering_d6_GRANEROS_2015_OPT_qDTS3_2	AX-90835099	AX-90835093	161296968	Founder_prob	600K_SNP
-12.7349	6.47135	-1.96788	CO255_inra	female_flowering_d6_GRANEROS_2015_OPT_qDTS3_2	AX-90835099	AX-90835093	161296968	Founder_prob	600K_SNP
-18.0058	7.1956	-2.50233	FV252_inra	female_flowering_d6_GRANEROS_2015_OPT_qDTS3_2	AX-90835099	AX-90835093	161296968	Founder_prob	600K_SNP
16.5963	5.10646	3.25005	OH43_inra	female_flowering_d6_GRANEROS_2015_OPT_qDTS3_2	AX-90835099	AX-90835093	161296968	Founder_prob	600K_SNP
-10.2625	7.63866	-1.3435	A654_inra	female_flowering_d6_GRANEROS_2015_OPT_qDTS3_2	AX-90835099	AX-90835093	161296968	Founder_prob	600K_SNP
-11.7595	6.00874	-1.95706	FV2_inra	female_flowering_d6_GRANEROS_2015_OPT_qDTS3_2	AX-90835099	AX-90835093	161296968	Founder_prob	600K_SNP
-1.10982	5.25428	-0.211221	C103_inra	female_flowering_d6_GRANEROS_2015_OPT_qDTS3_2	AX-90835099	AX-90835093	161296968	Founder_prob	600K_SNP
-23.1291	6.02674	-3.83775	EP1_inra	female_flowering_d6_GRANEROS_2015_OPT_qDTS3_2	AX-90835099	AX-90835093	161296968	Founder_prob	600K_SNP
-1.7485	6.79556	-0.2573	D105_inra	female_flowering_d6_GRANEROS_2015_OPT_qDTS3_2	AX-90835099	AX-90835093	161296968	Founder_prob	600K_SNP
5.84945	8.70572	0.671909	W117_inra	female_flowering_d6_GRANEROS_2015_OPT_qDTS3_2	AX-90835099	AX-90835093	161296968	Founder_prob	600K_SNP
25.878	4.62167	5.59926	B96	female_flowering_d6_GRANEROS_2015_OPT_qDTS3_2	AX-90835099	AX-90835093	161296968	Founder_prob	600K_SNP
-1.65572	4.49099	-0.368677	DK63	female_flowering_d6_GRANEROS_2015_OPT_qDTS3_2	AX-90835099	AX-90835093	161296968	Founder_prob	600K_SNP
0.276404	5.24787	0.0526697	F492	female_flowering_d6_GRANEROS_2015_OPT_qDTS3_2	AX-90835099	AX-90835093	161296968	Founder_prob	600K_SNP
-1.67189	5.97392	-0.279865	ND245	female_flowering_d6_GRANEROS_2015_OPT_qDTS3_2	AX-90835099	AX-90835093	161296968	Founder_prob	600K_SNP
-1.16178	6.32545	-0.183667	VA85	female_flowering_d6_GRANEROS_2015_OPT_qDTS3_2	AX-90835099	AX-90835093	161296968	Founder_prob	600K_SNP
28.65	5.55824	5.15451	B73_inra	female_flowering_d6_GRANEROS_2015_OPT_qDTS8	AX-91099031	AX-90622557	120807460	Founder_prob	600K_SNP
6.07869	6.99627	0.868848	A632_usa	female_flowering_d6_GRANEROS_2015_OPT_qDTS8	AX-91099031	AX-90622557	120807460	Founder_prob	600K_SNP
3.79754	4.79632	0.791762	CO255_inra	female_flowering_d6_GRANEROS_2015_OPT_qDTS8	AX-91099031	AX-90622557	120807460	Founder_prob	600K_SNP
10.4519	5.68463	1.83863	FV252_inra	female_flowering_d6_GRANEROS_2015_OPT_qDTS8	AX-91099031	AX-90622557	120807460	Founder_prob	600K_SNP
0.686396	7.00099	0.0980427	OH43_inra	female_flowering_d6_GRANEROS_2015_OPT_qDTS8	AX-91099031	AX-90622557	120807460	Founder_prob	600K_SNP
-12.0083	4.49421	-2.67196	A654_inra	female_flowering_d6_GRANEROS_2015_OPT_qDTS8	AX-91099031	AX-90622557	120807460	Founder_prob	600K_SNP
-5.30208	7.08192	-0.748678	FV2_inra	female_flowering_d6_GRANEROS_2015_OPT_qDTS8	AX-91099031	AX-90622557	120807460	Founder_prob	600K_SNP
8.46139	8.04261	1.05207	C103_inra	female_flowering_d6_GRANEROS_2015_OPT_qDTS8	AX-91099031	AX-90622557	120807460	Founder_prob	600K_SNP
-14.7509	5.23665	-2.81686	EP1_inra	female_flowering_d6_GRANEROS_2015_OPT_qDTS8	AX-91099031	AX-90622557	120807460	Founder_prob	600K_SNP
-5.85565	5.05926	-1.15741	D105_inra	female_flowering_d6_GRANEROS_2015_OPT_qDTS8	AX-91099031	AX-90622557	120807460	Founder_prob	600K_SNP
-6.93308	6.24589	-1.11002	W117_inra	female_flowering_d6_GRANEROS_2015_OPT_qDTS8	AX-91099031	AX-90622557	120807460	Founder_prob	600K_SNP
12.499	8.59232	1.45468	B96	female_flowering_d6_GRANEROS_2015_OPT_qDTS8	AX-91099031	AX-90622557	120807460	Founder_prob	600K_SNP
-11.4986	5.1303	-2.24131	DK63	female_flowering_d6_GRANEROS_2015_OPT_qDTS8	AX-91099031	AX-90622557	120807460	Founder_prob	600K_SNP
4.28926	8.91478	0.481141	F492	female_flowering_d6_GRANEROS_2015_OPT_qDTS8	AX-91099031	AX-90622557	120807460	Founder_prob	600K_SNP
-23.2601	6.72292	-3.45983	ND245	female_flowering_d6_GRANEROS_2015_OPT_qDTS8	AX-91099031	AX-90622557	120807460	Founder_prob	600K_SNP
18.878	5.59892	3.37172	VA85	female_flowering_d6_GRANEROS_2015_OPT_qDTS8	AX-91099031	AX-90622557	120807460	Founder_prob	600K_SNP
10.9626	6.6709	1.64335	B73_inra	female_flowering_d6_GRANEROS_2015_OPT_qDTS3_2	AX-90835093	AX-90835093	161293416	Founder_prob	Founder_probs
-6.01364	8.31246	-0.723449	A632_usa	female_flowering_d6_GRANEROS_2015_OPT_qDTS3_2	AX-90835093	AX-90835093	161293416	Founder_prob	Founder_probs
-12.7349	6.47135	-1.96788	CO255_inra	female_flowering_d6_GRANEROS_2015_OPT_qDTS3_2	AX-90835093	AX-90835093	161293416	Founder_prob	Founder_probs
-18.0058	7.1956	-2.50233	FV252_inra	female_flowering_d6_GRANEROS_2015_OPT_qDTS3_2	AX-90835093	AX-90835093	161293416	Founder_prob	Founder_probs
16.5963	5.10646	3.25005	OH43_inra	female_flowering_d6_GRANEROS_2015_OPT_qDTS3_2	AX-90835093	AX-90835093	161293416	Founder_prob	Founder_probs
-10.2625	7.63866	-1.3435	A654_inra	female_flowering_d6_GRANEROS_2015_OPT_qDTS3_2	AX-90835093	AX-90835093	161293416	Founder_prob	Founder_probs
-11.7595	6.00874	-1.95706	FV2_inra	female_flowering_d6_GRANEROS_2015_OPT_qDTS3_2	AX-90835093	AX-90835093	161293416	Founder_prob	Founder_probs
-1.10982	5.25428	-0.211221	C103_inra	female_flowering_d6_GRANEROS_2015_OPT_qDTS3_2	AX-90835093	AX-90835093	161293416	Founder_prob	Founder_probs
-23.1291	6.02674	-3.83775	EP1_inra	female_flowering_d6_GRANEROS_2015_OPT_qDTS3_2	AX-90835093	AX-90835093	161293416	Founder_prob	Founder_probs
-1.7485	6.79556	-0.2573	D105_inra	female_flowering_d6_GRANEROS_2015_OPT_qDTS3_2	AX-90835093	AX-90835093	161293416	Founder_prob	Founder_probs
5.84945	8.70572	0.671909	W117_inra	female_flowering_d6_GRANEROS_2015_OPT_qDTS3_2	AX-90835093	AX-90835093	161293416	Founder_prob	Founder_probs
25.878	4.62167	5.59926	B96	female_flowering_d6_GRANEROS_2015_OPT_qDTS3_2	AX-90835093	AX-90835093	161293416	Founder_prob	Founder_probs
-1.65572	4.49099	-0.368677	DK63	female_flowering_d6_GRANEROS_2015_OPT_qDTS3_2	AX-90835093	AX-90835093	161293416	Founder_prob	Founder_probs
0.276404	5.24787	0.0526697	F492	female_flowering_d6_GRANEROS_2015_OPT_qDTS3_2	AX-90835093	AX-90835093	161293416	Founder_prob	Founder_probs
-1.67189	5.97392	-0.279865	ND245	female_flowering_d6_GRANEROS_2015_OPT_qDTS3_2	AX-90835093	AX-90835093	161293416	Founder_prob	Founder_probs
-1.16178	6.32545	-0.183667	VA85	female_flowering_d6_GRANEROS_2015_OPT_qDTS3_2	AX-90835093	AX-90835093	161293416	Founder_prob	Founder_probs
28.7133	5.53277	5.18968	B73_inra	female_flowering_d6_GRANEROS_2015_OPT_qDTS8	AX-91099134	AX-91099134	121124614	Founder_prob	Founder_probs
6.05368	6.97026	0.868502	A632_usa	female_flowering_d6_GRANEROS_2015_OPT_qDTS8	AX-91099134	AX-91099134	121124614	Founder_prob	Founder_probs
0.70627	4.8259	0.14635	CO255_inra	female_flowering_d6_GRANEROS_2015_OPT_qDTS8	AX-91099134	AX-91099134	121124614	Founder_prob	Founder_probs
11.4705	5.60439	2.04671	FV252_inra	female_flowering_d6_GRANEROS_2015_OPT_qDTS8	AX-91099134	AX-91099134	121124614	Founder_prob	Founder_probs
4.2219	7.11143	0.593678	OH43_inra	female_flowering_d6_GRANEROS_2015_OPT_qDTS8	AX-91099134	AX-91099134	121124614	Founder_prob	Founder_probs
-12.6044	4.41511	-2.85482	A654_inra	female_flowering_d6_GRANEROS_2015_OPT_qDTS8	AX-91099134	AX-91099134	121124614	Founder_prob	Founder_probs
-4.18304	6.64692	-0.629321	FV2_inra	female_flowering_d6_GRANEROS_2015_OPT_qDTS8	AX-91099134	AX-91099134	121124614	Founder_prob	Founder_probs
6.57043	8.4283	0.779567	C103_inra	female_flowering_d6_GRANEROS_2015_OPT_qDTS8	AX-91099134	AX-91099134	121124614	Founder_prob	Founder_probs
-14.2093	5.35975	-2.6511	EP1_inra	female_flowering_d6_GRANEROS_2015_OPT_qDTS8	AX-91099134	AX-91099134	121124614	Founder_prob	Founder_probs
-5.5878	5.02765	-1.11141	D105_inra	female_flowering_d6_GRANEROS_2015_OPT_qDTS8	AX-91099134	AX-91099134	121124614	Founder_prob	Founder_probs
-6.83552	6.22574	-1.09794	W117_inra	female_flowering_d6_GRANEROS_2015_OPT_qDTS8	AX-91099134	AX-91099134	121124614	Founder_prob	Founder_probs
12.7152	8.55711	1.48592	B96	female_flowering_d6_GRANEROS_2015_OPT_qDTS8	AX-91099134	AX-91099134	121124614	Founder_prob	Founder_probs
-11.5159	5.11503	-2.25139	DK63	female_flowering_d6_GRANEROS_2015_OPT_qDTS8	AX-91099134	AX-91099134	121124614	Founder_prob	Founder_probs
4.54636	8.88363	0.511768	F492	female_flowering_d6_GRANEROS_2015_OPT_qDTS8	AX-91099134	AX-91099134	121124614	Founder_prob	Founder_probs
-23.5238	6.70183	-3.51006	ND245	female_flowering_d6_GRANEROS_2015_OPT_qDTS8	AX-91099134	AX-91099134	121124614	Founder_prob	Founder_probs
20.7684	5.68262	3.65473	VA85	female_flowering_d6_GRANEROS_2015_OPT_qDTS8	AX-91099134	AX-91099134	121124614	Founder_prob	Founder_probs
9.59374	6.87967	1.39451	B73_inra	female_flowering_d6_GRANEROS_2015_OPT_qDTS3_2	AX-90834914	AX-90834914	160426458	Founder_prob	Haplotype_probs
-4.39509	7.9543	-0.552543	A632_usa	female_flowering_d6_GRANEROS_2015_OPT_qDTS3_2	AX-90834914	AX-90834914	160426458	Founder_prob	Haplotype_probs
-15.5236	6.90195	-2.24916	CO255_inra	female_flowering_d6_GRANEROS_2015_OPT_qDTS3_2	AX-90834914	AX-90834914	160426458	Founder_prob	Haplotype_probs
-18.61	7.21516	-2.57929	FV252_inra	female_flowering_d6_GRANEROS_2015_OPT_qDTS3_2	AX-90834914	AX-90834914	160426458	Founder_prob	Haplotype_probs
14.9108	4.92419	3.02807	OH43_inra	female_flowering_d6_GRANEROS_2015_OPT_qDTS3_2	AX-90834914	AX-90834914	160426458	Founder_prob	Haplotype_probs
-8.35889	7.36691	-1.13465	A654_inra	female_flowering_d6_GRANEROS_2015_OPT_qDTS3_2	AX-90834914	AX-90834914	160426458	Founder_prob	Haplotype_probs
-11.5101	6.01913	-1.91225	FV2_inra	female_flowering_d6_GRANEROS_2015_OPT_qDTS3_2	AX-90834914	AX-90834914	160426458	Founder_prob	Haplotype_probs
1.34643	5.50723	0.244484	C103_inra	female_flowering_d6_GRANEROS_2015_OPT_qDTS3_2	AX-90834914	AX-90834914	160426458	Founder_prob	Haplotype_probs
-23.2078	6.03924	-3.84283	EP1_inra	female_flowering_d6_GRANEROS_2015_OPT_qDTS3_2	AX-90834914	AX-90834914	160426458	Founder_prob	Haplotype_probs
0.908926	6.99174	0.13	D105_inra	female_flowering_d6_GRANEROS_2015_OPT_qDTS3_2	AX-90834914	AX-90834914	160426458	Founder_prob	Haplotype_probs
4.21571	8.34481	0.50519	W117_inra	female_flowering_d6_GRANEROS_2015_OPT_qDTS3_2	AX-90834914	AX-90834914	160426458	Founder_prob	Haplotype_probs
26.4642	4.735	5.58905	B96	female_flowering_d6_GRANEROS_2015_OPT_qDTS3_2	AX-90834914	AX-90834914	160426458	Founder_prob	Haplotype_probs
-1.33613	4.50367	-0.296676	DK63	female_flowering_d6_GRANEROS_2015_OPT_qDTS3_2	AX-90834914	AX-90834914	160426458	Founder_prob	Haplotype_probs
0.602928	5.24172	0.115025	F492	female_flowering_d6_GRANEROS_2015_OPT_qDTS3_2	AX-90834914	AX-90834914	160426458	Founder_prob	Haplotype_probs
-1.1382	6.16532	-0.184613	ND245	female_flowering_d6_GRANEROS_2015_OPT_qDTS3_2	AX-90834914	AX-90834914	160426458	Founder_prob	Haplotype_probs
-4.75868	5.91472	-0.804548	VA85	female_flowering_d6_GRANEROS_2015_OPT_qDTS3_2	AX-90834914	AX-90834914	160426458	Founder_prob	Haplotype_probs
28.65	5.55824	5.15451	B73_inra	female_flowering_d6_GRANEROS_2015_OPT_qDTS8	AX-90590533	AX-90622557	120660344	Founder_prob	Haplotype_probs
6.07869	6.99627	0.868848	A632_usa	female_flowering_d6_GRANEROS_2015_OPT_qDTS8	AX-90590533	AX-90622557	120660344	Founder_prob	Haplotype_probs
3.79754	4.79632	0.791762	CO255_inra	female_flowering_d6_GRANEROS_2015_OPT_qDTS8	AX-90590533	AX-90622557	120660344	Founder_prob	Haplotype_probs
10.4519	5.68463	1.83863	FV252_inra	female_flowering_d6_GRANEROS_2015_OPT_qDTS8	AX-90590533	AX-90622557	120660344	Founder_prob	Haplotype_probs
0.686396	7.00099	0.0980427	OH43_inra	female_flowering_d6_GRANEROS_2015_OPT_qDTS8	AX-90590533	AX-90622557	120660344	Founder_prob	Haplotype_probs
-12.0083	4.49421	-2.67196	A654_inra	female_flowering_d6_GRANEROS_2015_OPT_qDTS8	AX-90590533	AX-90622557	120660344	Founder_prob	Haplotype_probs
-5.30208	7.08192	-0.748678	FV2_inra	female_flowering_d6_GRANEROS_2015_OPT_qDTS8	AX-90590533	AX-90622557	120660344	Founder_prob	Haplotype_probs
8.46139	8.04261	1.05207	C103_inra	female_flowering_d6_GRANEROS_2015_OPT_qDTS8	AX-90590533	AX-90622557	120660344	Founder_prob	Haplotype_probs
-14.7509	5.23665	-2.81686	EP1_inra	female_flowering_d6_GRANEROS_2015_OPT_qDTS8	AX-90590533	AX-90622557	120660344	Founder_prob	Haplotype_probs
-5.85565	5.05926	-1.15741	D105_inra	female_flowering_d6_GRANEROS_2015_OPT_qDTS8	AX-90590533	AX-90622557	120660344	Founder_prob	Haplotype_probs
-6.93308	6.24589	-1.11002	W117_inra	female_flowering_d6_GRANEROS_2015_OPT_qDTS8	AX-90590533	AX-90622557	120660344	Founder_prob	Haplotype_probs
12.499	8.59232	1.45468	B96	female_flowering_d6_GRANEROS_2015_OPT_qDTS8	AX-90590533	AX-90622557	120660344	Founder_prob	Haplotype_probs
-11.4986	5.1303	-2.24131	DK63	female_flowering_d6_GRANEROS_2015_OPT_qDTS8	AX-90590533	AX-90622557	120660344	Founder_prob	Haplotype_probs
4.28926	8.91478	0.481141	F492	female_flowering_d6_GRANEROS_2015_OPT_qDTS8	AX-90590533	AX-90622557	120660344	Founder_prob	Haplotype_probs
-23.2601	6.72292	-3.45983	ND245	female_flowering_d6_GRANEROS_2015_OPT_qDTS8	AX-90590533	AX-90622557	120660344	Founder_prob	Haplotype_probs
18.878	5.59892	3.37172	VA85	female_flowering_d6_GRANEROS_2015_OPT_qDTS8	AX-90590533	AX-90622557	120660344	Founder_prob	Haplotype_probs
12.9272	8.56137	1.50994	B73_inra	female_flowering_d6_NERAC_2016_WD_qDTS3_2	AX-90586701	AX-90834914	160559504	Founder_prob	600K_SNP
-6.02671	10.8242	-0.556779	A632_usa	female_flowering_d6_NERAC_2016_WD_qDTS3_2	AX-90586701	AX-90834914	160559504	Founder_prob	600K_SNP
-33.4753	9.02831	-3.70781	CO255_inra	female_flowering_d6_NERAC_2016_WD_qDTS3_2	AX-90586701	AX-90834914	160559504	Founder_prob	600K_SNP
-28.9667	9.41646	-3.07618	FV252_inra	female_flowering_d6_NERAC_2016_WD_qDTS3_2	AX-90586701	AX-90834914	160559504	Founder_prob	600K_SNP
25.4959	6.62793	3.84674	OH43_inra	female_flowering_d6_NERAC_2016_WD_qDTS3_2	AX-90586701	AX-90834914	160559504	Founder_prob	600K_SNP
-15.6895	9.8709	-1.58947	A654_inra	female_flowering_d6_NERAC_2016_WD_qDTS3_2	AX-90586701	AX-90834914	160559504	Founder_prob	600K_SNP
-13.5647	7.54737	-1.79728	FV2_inra	female_flowering_d6_NERAC_2016_WD_qDTS3_2	AX-90586701	AX-90834914	160559504	Founder_prob	600K_SNP
3.99281	7.3185	0.545578	C103_inra	female_flowering_d6_NERAC_2016_WD_qDTS3_2	AX-90586701	AX-90834914	160559504	Founder_prob	600K_SNP
-34.9995	7.8123	-4.48005	EP1_inra	female_flowering_d6_NERAC_2016_WD_qDTS3_2	AX-90586701	AX-90834914	160559504	Founder_prob	600K_SNP
-7.84854	9.11012	-0.861519	D105_inra	female_flowering_d6_NERAC_2016_WD_qDTS3_2	AX-90586701	AX-90834914	160559504	Founder_prob	600K_SNP
9.7146	10.9605	0.886325	W117_inra	female_flowering_d6_NERAC_2016_WD_qDTS3_2	AX-90586701	AX-90834914	160559504	Founder_prob	600K_SNP
22.478	6.34213	3.54423	B96	female_flowering_d6_NERAC_2016_WD_qDTS3_2	AX-90586701	AX-90834914	160559504	Founder_prob	600K_SNP
12.0608	5.8769	2.05225	DK63	female_flowering_d6_NERAC_2016_WD_qDTS3_2	AX-90586701	AX-90834914	160559504	Founder_prob	600K_SNP
3.4271	7.22195	0.47454	F492	female_flowering_d6_NERAC_2016_WD_qDTS3_2	AX-90586701	AX-90834914	160559504	Founder_prob	600K_SNP
-1.82327	7.79379	-0.233939	ND245	female_flowering_d6_NERAC_2016_WD_qDTS3_2	AX-90586701	AX-90834914	160559504	Founder_prob	600K_SNP
0.634365	7.98216	0.0794728	VA85	female_flowering_d6_NERAC_2016_WD_qDTS3_2	AX-90586701	AX-90834914	160559504	Founder_prob	600K_SNP
12.9272	8.56137	1.50994	B73_inra	female_flowering_d6_NERAC_2016_WD_qDTS3_2	AX-90834914	AX-90834914	160426458	Founder_prob	Founder_probs
-6.02671	10.8242	-0.556779	A632_usa	female_flowering_d6_NERAC_2016_WD_qDTS3_2	AX-90834914	AX-90834914	160426458	Founder_prob	Founder_probs
-33.4753	9.02831	-3.70781	CO255_inra	female_flowering_d6_NERAC_2016_WD_qDTS3_2	AX-90834914	AX-90834914	160426458	Founder_prob	Founder_probs
-28.9667	9.41646	-3.07618	FV252_inra	female_flowering_d6_NERAC_2016_WD_qDTS3_2	AX-90834914	AX-90834914	160426458	Founder_prob	Founder_probs
25.4959	6.62793	3.84674	OH43_inra	female_flowering_d6_NERAC_2016_WD_qDTS3_2	AX-90834914	AX-90834914	160426458	Founder_prob	Founder_probs
-15.6895	9.8709	-1.58947	A654_inra	female_flowering_d6_NERAC_2016_WD_qDTS3_2	AX-90834914	AX-90834914	160426458	Founder_prob	Founder_probs
-13.5647	7.54737	-1.79728	FV2_inra	female_flowering_d6_NERAC_2016_WD_qDTS3_2	AX-90834914	AX-90834914	160426458	Founder_prob	Founder_probs
3.99281	7.3185	0.545578	C103_inra	female_flowering_d6_NERAC_2016_WD_qDTS3_2	AX-90834914	AX-90834914	160426458	Founder_prob	Founder_probs
-34.9995	7.8123	-4.48005	EP1_inra	female_flowering_d6_NERAC_2016_WD_qDTS3_2	AX-90834914	AX-90834914	160426458	Founder_prob	Founder_probs
-7.84854	9.11012	-0.861519	D105_inra	female_flowering_d6_NERAC_2016_WD_qDTS3_2	AX-90834914	AX-90834914	160426458	Founder_prob	Founder_probs
9.7146	10.9605	0.886325	W117_inra	female_flowering_d6_NERAC_2016_WD_qDTS3_2	AX-90834914	AX-90834914	160426458	Founder_prob	Founder_probs
22.478	6.34213	3.54423	B96	female_flowering_d6_NERAC_2016_WD_qDTS3_2	AX-90834914	AX-90834914	160426458	Founder_prob	Founder_probs
12.0608	5.8769	2.05225	DK63	female_flowering_d6_NERAC_2016_WD_qDTS3_2	AX-90834914	AX-90834914	160426458	Founder_prob	Founder_probs
3.4271	7.22195	0.47454	F492	female_flowering_d6_NERAC_2016_WD_qDTS3_2	AX-90834914	AX-90834914	160426458	Founder_prob	Founder_probs
-1.82327	7.79379	-0.233939	ND245	female_flowering_d6_NERAC_2016_WD_qDTS3_2	AX-90834914	AX-90834914	160426458	Founder_prob	Founder_probs
0.634365	7.98216	0.0794728	VA85	female_flowering_d6_NERAC_2016_WD_qDTS3_2	AX-90834914	AX-90834914	160426458	Founder_prob	Founder_probs
14.2418	8.02525	1.77462	B73_inra	female_flowering_d6_NERAC_2016_WD_qDTS3_1	AX-90796878	AX-90796866	10867320	Founder_prob	Haplotype_probs
-33.2239	9.20515	-3.60927	CO255_inra	female_flowering_d6_NERAC_2016_WD_qDTS3_1	AX-90796878	AX-90796866	10867320	Founder_prob	Haplotype_probs
-14.8033	11.079	-1.33616	FV252_inra	female_flowering_d6_NERAC_2016_WD_qDTS3_1	AX-90796878	AX-90796866	10867320	Founder_prob	Haplotype_probs
1.72009	8.22904	0.209026	OH43_inra	female_flowering_d6_NERAC_2016_WD_qDTS3_1	AX-90796878	AX-90796866	10867320	Founder_prob	Haplotype_probs
-2.90852	8.78465	-0.331091	A654_inra	female_flowering_d6_NERAC_2016_WD_qDTS3_1	AX-90796878	AX-90796866	10867320	Founder_prob	Haplotype_probs
-9.97396	7.19726	-1.3858	FV2_inra	female_flowering_d6_NERAC_2016_WD_qDTS3_1	AX-90796878	AX-90796866	10867320	Founder_prob	Haplotype_probs
-0.922326	7.24127	-0.127371	C103_inra	female_flowering_d6_NERAC_2016_WD_qDTS3_1	AX-90796878	AX-90796866	10867320	Founder_prob	Haplotype_probs
-18.0127	25.374	-0.709887	EP1_inra	female_flowering_d6_NERAC_2016_WD_qDTS3_1	AX-90796878	AX-90796866	10867320	Founder_prob	Haplotype_probs
-9.81253	8.64713	-1.13477	D105_inra	female_flowering_d6_NERAC_2016_WD_qDTS3_1	AX-90796878	AX-90796866	10867320	Founder_prob	Haplotype_probs
-2.52213	16.1412	-0.156254	W117_inra	female_flowering_d6_NERAC_2016_WD_qDTS3_1	AX-90796878	AX-90796866	10867320	Founder_prob	Haplotype_probs
16.4427	8.20945	2.0029	B96	female_flowering_d6_NERAC_2016_WD_qDTS3_1	AX-90796878	AX-90796866	10867320	Founder_prob	Haplotype_probs
15.3756	5.82804	2.6382	DK63	female_flowering_d6_NERAC_2016_WD_qDTS3_1	AX-90796878	AX-90796866	10867320	Founder_prob	Haplotype_probs
0.488814	6.774	0.0721604	F492	female_flowering_d6_NERAC_2016_WD_qDTS3_1	AX-90796878	AX-90796866	10867320	Founder_prob	Haplotype_probs
10.4994	7.40728	1.41744	ND245	female_flowering_d6_NERAC_2016_WD_qDTS3_1	AX-90796878	AX-90796866	10867320	Founder_prob	Haplotype_probs
3.4678	10.0143	0.346284	VA85	female_flowering_d6_NERAC_2016_WD_qDTS3_1	AX-90796878	AX-90796866	10867320	Founder_prob	Haplotype_probs
12.9272	8.56137	1.50994	B73_inra	female_flowering_d6_NERAC_2016_WD_qDTS3_2	AX-91583302	AX-90834914	160518557	Founder_prob	Haplotype_probs
-6.02671	10.8242	-0.556779	A632_usa	female_flowering_d6_NERAC_2016_WD_qDTS3_2	AX-91583302	AX-90834914	160518557	Founder_prob	Haplotype_probs
-33.4753	9.02831	-3.70781	CO255_inra	female_flowering_d6_NERAC_2016_WD_qDTS3_2	AX-91583302	AX-90834914	160518557	Founder_prob	Haplotype_probs
-28.9667	9.41646	-3.07618	FV252_inra	female_flowering_d6_NERAC_2016_WD_qDTS3_2	AX-91583302	AX-90834914	160518557	Founder_prob	Haplotype_probs
25.4959	6.62793	3.84674	OH43_inra	female_flowering_d6_NERAC_2016_WD_qDTS3_2	AX-91583302	AX-90834914	160518557	Founder_prob	Haplotype_probs
-15.6895	9.8709	-1.58947	A654_inra	female_flowering_d6_NERAC_2016_WD_qDTS3_2	AX-91583302	AX-90834914	160518557	Founder_prob	Haplotype_probs
-13.5647	7.54737	-1.79728	FV2_inra	female_flowering_d6_NERAC_2016_WD_qDTS3_2	AX-91583302	AX-90834914	160518557	Founder_prob	Haplotype_probs
3.99281	7.3185	0.545578	C103_inra	female_flowering_d6_NERAC_2016_WD_qDTS3_2	AX-91583302	AX-90834914	160518557	Founder_prob	Haplotype_probs
-34.9995	7.8123	-4.48005	EP1_inra	female_flowering_d6_NERAC_2016_WD_qDTS3_2	AX-91583302	AX-90834914	160518557	Founder_prob	Haplotype_probs
-7.84854	9.11012	-0.861519	D105_inra	female_flowering_d6_NERAC_2016_WD_qDTS3_2	AX-91583302	AX-90834914	160518557	Founder_prob	Haplotype_probs
9.7146	10.9605	0.886325	W117_inra	female_flowering_d6_NERAC_2016_WD_qDTS3_2	AX-91583302	AX-90834914	160518557	Founder_prob	Haplotype_probs
22.478	6.34213	3.54423	B96	female_flowering_d6_NERAC_2016_WD_qDTS3_2	AX-91583302	AX-90834914	160518557	Founder_prob	Haplotype_probs
12.0608	5.8769	2.05225	DK63	female_flowering_d6_NERAC_2016_WD_qDTS3_2	AX-91583302	AX-90834914	160518557	Founder_prob	Haplotype_probs
3.4271	7.22195	0.47454	F492	female_flowering_d6_NERAC_2016_WD_qDTS3_2	AX-91583302	AX-90834914	160518557	Founder_prob	Haplotype_probs
-1.82327	7.79379	-0.233939	ND245	female_flowering_d6_NERAC_2016_WD_qDTS3_2	AX-91583302	AX-90834914	160518557	Founder_prob	Haplotype_probs
0.634365	7.98216	0.0794728	VA85	female_flowering_d6_NERAC_2016_WD_qDTS3_2	AX-91583302	AX-90834914	160518557	Founder_prob	Haplotype_probs
-7.62642	6.95642	-1.09631	B73_inra	female_flowering_d6_SZEGED_2017_OPT_qDTS3_2	AX-91383809	AX-90834177	157563421	Founder_prob	600K_SNP
-0.0591959	10.5145	-0.00562994	A632_usa	female_flowering_d6_SZEGED_2017_OPT_qDTS3_2	AX-91383809	AX-90834177	157563421	Founder_prob	600K_SNP
-8.9859	7.39709	-1.21479	CO255_inra	female_flowering_d6_SZEGED_2017_OPT_qDTS3_2	AX-91383809	AX-90834177	157563421	Founder_prob	600K_SNP
-16.9827	7.99884	-2.12315	FV252_inra	female_flowering_d6_SZEGED_2017_OPT_qDTS3_2	AX-91383809	AX-90834177	157563421	Founder_prob	600K_SNP
11.2913	5.02246	2.24817	OH43_inra	female_flowering_d6_SZEGED_2017_OPT_qDTS3_2	AX-91383809	AX-90834177	157563421	Founder_prob	600K_SNP
-7.24679	7.97418	-0.908781	A654_inra	female_flowering_d6_SZEGED_2017_OPT_qDTS3_2	AX-91383809	AX-90834177	157563421	Founder_prob	600K_SNP
-0.707969	5.36037	-0.132075	FV2_inra	female_flowering_d6_SZEGED_2017_OPT_qDTS3_2	AX-91383809	AX-90834177	157563421	Founder_prob	600K_SNP
-5.20906	5.73981	-0.907533	C103_inra	female_flowering_d6_SZEGED_2017_OPT_qDTS3_2	AX-91383809	AX-90834177	157563421	Founder_prob	600K_SNP
-9.26856	6.00709	-1.54294	EP1_inra	female_flowering_d6_SZEGED_2017_OPT_qDTS3_2	AX-91383809	AX-90834177	157563421	Founder_prob	600K_SNP
2.55336	7.99654	0.319308	D105_inra	female_flowering_d6_SZEGED_2017_OPT_qDTS3_2	AX-91383809	AX-90834177	157563421	Founder_prob	600K_SNP
16.8831	8.07236	2.09146	W117_inra	female_flowering_d6_SZEGED_2017_OPT_qDTS3_2	AX-91383809	AX-90834177	157563421	Founder_prob	600K_SNP
25.1008	5.63511	4.45436	B96	female_flowering_d6_SZEGED_2017_OPT_qDTS3_2	AX-91383809	AX-90834177	157563421	Founder_prob	600K_SNP
2.29537	4.90534	0.467933	DK63	female_flowering_d6_SZEGED_2017_OPT_qDTS3_2	AX-91383809	AX-90834177	157563421	Founder_prob	600K_SNP
4.43526	5.67124	0.782061	F492	female_flowering_d6_SZEGED_2017_OPT_qDTS3_2	AX-91383809	AX-90834177	157563421	Founder_prob	600K_SNP
-14.3478	6.52621	-2.19849	ND245	female_flowering_d6_SZEGED_2017_OPT_qDTS3_2	AX-91383809	AX-90834177	157563421	Founder_prob	600K_SNP
-10.845	6.32196	-1.71544	VA85	female_flowering_d6_SZEGED_2017_OPT_qDTS3_2	AX-91383809	AX-90834177	157563421	Founder_prob	600K_SNP
9.69334	5.05266	1.91846	B73_inra	female_flowering_d6_SZEGED_2017_OPT_qDTS8	AX-91100991	AX-91100867	128360284	Founder_prob	600K_SNP
12.8166	7.17629	1.78597	A632_usa	female_flowering_d6_SZEGED_2017_OPT_qDTS8	AX-91100991	AX-91100867	128360284	Founder_prob	600K_SNP
-4.25683	5.35531	-0.79488	CO255_inra	female_flowering_d6_SZEGED_2017_OPT_qDTS8	AX-91100991	AX-91100867	128360284	Founder_prob	600K_SNP
10.7145	6.41924	1.66912	FV252_inra	female_flowering_d6_SZEGED_2017_OPT_qDTS8	AX-91100991	AX-91100867	128360284	Founder_prob	600K_SNP
10.2401	8.3168	1.23126	OH43_inra	female_flowering_d6_SZEGED_2017_OPT_qDTS8	AX-91100991	AX-91100867	128360284	Founder_prob	600K_SNP
-6.55588	5.02605	-1.30438	A654_inra	female_flowering_d6_SZEGED_2017_OPT_qDTS8	AX-91100991	AX-91100867	128360284	Founder_prob	600K_SNP
0.429673	5.55806	0.0773063	FV2_inra	female_flowering_d6_SZEGED_2017_OPT_qDTS8	AX-91100991	AX-91100867	128360284	Founder_prob	600K_SNP
0.904051	7.81756	0.115644	C103_inra	female_flowering_d6_SZEGED_2017_OPT_qDTS8	AX-91100991	AX-91100867	128360284	Founder_prob	600K_SNP
-18.9175	7.29507	-2.59319	EP1_inra	female_flowering_d6_SZEGED_2017_OPT_qDTS8	AX-91100991	AX-91100867	128360284	Founder_prob	600K_SNP
-7.74968	5.02152	-1.54329	D105_inra	female_flowering_d6_SZEGED_2017_OPT_qDTS8	AX-91100991	AX-91100867	128360284	Founder_prob	600K_SNP
-2.92381	6.08874	-0.4802	W117_inra	female_flowering_d6_SZEGED_2017_OPT_qDTS8	AX-91100991	AX-91100867	128360284	Founder_prob	600K_SNP
23.8313	8.1743	2.91539	B96	female_flowering_d6_SZEGED_2017_OPT_qDTS8	AX-91100991	AX-91100867	128360284	Founder_prob	600K_SNP
-14.1813	6.32123	-2.24344	DK63	female_flowering_d6_SZEGED_2017_OPT_qDTS8	AX-91100991	AX-91100867	128360284	Founder_prob	600K_SNP
5.94543	8.37754	0.709687	F492	female_flowering_d6_SZEGED_2017_OPT_qDTS8	AX-91100991	AX-91100867	128360284	Founder_prob	600K_SNP
-19.3694	7.04734	-2.74847	ND245	female_flowering_d6_SZEGED_2017_OPT_qDTS8	AX-91100991	AX-91100867	128360284	Founder_prob	600K_SNP
13.7786	7.32134	1.88198	VA85	female_flowering_d6_SZEGED_2017_OPT_qDTS8	AX-91100991	AX-91100867	128360284	Founder_prob	600K_SNP
-3.03075	7.29835	-0.415265	B73_inra	female_flowering_d6_SZEGED_2017_OPT_qDTS3_2	AX-90834914	AX-90834914	160426458	Founder_prob	Founder_probs
8.22803	8.64063	0.952249	A632_usa	female_flowering_d6_SZEGED_2017_OPT_qDTS3_2	AX-90834914	AX-90834914	160426458	Founder_prob	Founder_probs
-13.7238	7.56914	-1.81312	CO255_inra	female_flowering_d6_SZEGED_2017_OPT_qDTS3_2	AX-90834914	AX-90834914	160426458	Founder_prob	Founder_probs
-22.054	7.84229	-2.81219	FV252_inra	female_flowering_d6_SZEGED_2017_OPT_qDTS3_2	AX-90834914	AX-90834914	160426458	Founder_prob	Founder_probs
15.9258	5.12048	3.11023	OH43_inra	female_flowering_d6_SZEGED_2017_OPT_qDTS3_2	AX-90834914	AX-90834914	160426458	Founder_prob	Founder_probs
-9.22584	7.89247	-1.16894	A654_inra	female_flowering_d6_SZEGED_2017_OPT_qDTS3_2	AX-90834914	AX-90834914	160426458	Founder_prob	Founder_probs
-1.08993	6.14299	-0.177426	FV2_inra	female_flowering_d6_SZEGED_2017_OPT_qDTS3_2	AX-90834914	AX-90834914	160426458	Founder_prob	Founder_probs
-1.83767	5.70739	-0.32198	C103_inra	female_flowering_d6_SZEGED_2017_OPT_qDTS3_2	AX-90834914	AX-90834914	160426458	Founder_prob	Founder_probs
-17.4912	5.93728	-2.946	EP1_inra	female_flowering_d6_SZEGED_2017_OPT_qDTS3_2	AX-90834914	AX-90834914	160426458	Founder_prob	Founder_probs
1.52406	7.54923	0.201882	D105_inra	female_flowering_d6_SZEGED_2017_OPT_qDTS3_2	AX-90834914	AX-90834914	160426458	Founder_prob	Founder_probs
17.3827	7.98019	2.17823	W117_inra	female_flowering_d6_SZEGED_2017_OPT_qDTS3_2	AX-90834914	AX-90834914	160426458	Founder_prob	Founder_probs
19.4236	4.94365	3.929	B96	female_flowering_d6_SZEGED_2017_OPT_qDTS3_2	AX-90834914	AX-90834914	160426458	Founder_prob	Founder_probs
5.28914	4.59854	1.15018	DK63	female_flowering_d6_SZEGED_2017_OPT_qDTS3_2	AX-90834914	AX-90834914	160426458	Founder_prob	Founder_probs
1.24379	5.66937	0.219388	F492	female_flowering_d6_SZEGED_2017_OPT_qDTS3_2	AX-90834914	AX-90834914	160426458	Founder_prob	Founder_probs
-14.6515	6.42201	-2.28145	ND245	female_flowering_d6_SZEGED_2017_OPT_qDTS3_2	AX-90834914	AX-90834914	160426458	Founder_prob	Founder_probs
-13.1147	6.25475	-2.09675	VA85	female_flowering_d6_SZEGED_2017_OPT_qDTS3_2	AX-90834914	AX-90834914	160426458	Founder_prob	Founder_probs
10.7692	5.01611	2.14692	B73_inra	female_flowering_d6_SZEGED_2017_OPT_qDTS8	AX-91106686	AX-91106686	149592078	Founder_prob	Founder_probs
9.61097	5.30155	1.81286	A632_usa	female_flowering_d6_SZEGED_2017_OPT_qDTS8	AX-91106686	AX-91106686	149592078	Founder_prob	Founder_probs
-14.5727	5.43724	-2.68017	CO255_inra	female_flowering_d6_SZEGED_2017_OPT_qDTS8	AX-91106686	AX-91106686	149592078	Founder_prob	Founder_probs
2.37142	5.65979	0.418994	FV252_inra	female_flowering_d6_SZEGED_2017_OPT_qDTS8	AX-91106686	AX-91106686	149592078	Founder_prob	Founder_probs
18.0497	6.70497	2.69199	OH43_inra	female_flowering_d6_SZEGED_2017_OPT_qDTS8	AX-91106686	AX-91106686	149592078	Founder_prob	Founder_probs
-5.20403	5.99837	-0.867575	A654_inra	female_flowering_d6_SZEGED_2017_OPT_qDTS8	AX-91106686	AX-91106686	149592078	Founder_prob	Founder_probs
-3.30713	5.25913	-0.628836	FV2_inra	female_flowering_d6_SZEGED_2017_OPT_qDTS8	AX-91106686	AX-91106686	149592078	Founder_prob	Founder_probs
12.0552	7.49897	1.60757	C103_inra	female_flowering_d6_SZEGED_2017_OPT_qDTS8	AX-91106686	AX-91106686	149592078	Founder_prob	Founder_probs
-29.3484	6.95432	-4.22017	EP1_inra	female_flowering_d6_SZEGED_2017_OPT_qDTS8	AX-91106686	AX-91106686	149592078	Founder_prob	Founder_probs
-10.7959	4.83326	-2.23367	D105_inra	female_flowering_d6_SZEGED_2017_OPT_qDTS8	AX-91106686	AX-91106686	149592078	Founder_prob	Founder_probs
-7.30389	7.14357	-1.02244	W117_inra	female_flowering_d6_SZEGED_2017_OPT_qDTS8	AX-91106686	AX-91106686	149592078	Founder_prob	Founder_probs
23.0777	10.2188	2.25836	B96	female_flowering_d6_SZEGED_2017_OPT_qDTS8	AX-91106686	AX-91106686	149592078	Founder_prob	Founder_probs
-1.47599	5.76473	-0.256038	DK63	female_flowering_d6_SZEGED_2017_OPT_qDTS8	AX-91106686	AX-91106686	149592078	Founder_prob	Founder_probs
13.8287	8.96536	1.54246	F492	female_flowering_d6_SZEGED_2017_OPT_qDTS8	AX-91106686	AX-91106686	149592078	Founder_prob	Founder_probs
-7.60411	8.8441	-0.859795	ND245	female_flowering_d6_SZEGED_2017_OPT_qDTS8	AX-91106686	AX-91106686	149592078	Founder_prob	Founder_probs
7.9257	6.0633	1.30716	VA85	female_flowering_d6_SZEGED_2017_OPT_qDTS8	AX-91106686	AX-91106686	149592078	Founder_prob	Founder_probs
-3.03075	7.29835	-0.415265	B73_inra	female_flowering_d6_SZEGED_2017_OPT_qDTS3_2	AX-90834914	AX-90834914	160426458	Founder_prob	Haplotype_probs
8.22803	8.64063	0.952249	A632_usa	female_flowering_d6_SZEGED_2017_OPT_qDTS3_2	AX-90834914	AX-90834914	160426458	Founder_prob	Haplotype_probs
-13.7238	7.56914	-1.81312	CO255_inra	female_flowering_d6_SZEGED_2017_OPT_qDTS3_2	AX-90834914	AX-90834914	160426458	Founder_prob	Haplotype_probs
-22.054	7.84229	-2.81219	FV252_inra	female_flowering_d6_SZEGED_2017_OPT_qDTS3_2	AX-90834914	AX-90834914	160426458	Founder_prob	Haplotype_probs
15.9258	5.12048	3.11023	OH43_inra	female_flowering_d6_SZEGED_2017_OPT_qDTS3_2	AX-90834914	AX-90834914	160426458	Founder_prob	Haplotype_probs
-9.22584	7.89247	-1.16894	A654_inra	female_flowering_d6_SZEGED_2017_OPT_qDTS3_2	AX-90834914	AX-90834914	160426458	Founder_prob	Haplotype_probs
-1.08993	6.14299	-0.177426	FV2_inra	female_flowering_d6_SZEGED_2017_OPT_qDTS3_2	AX-90834914	AX-90834914	160426458	Founder_prob	Haplotype_probs
-1.83767	5.70739	-0.32198	C103_inra	female_flowering_d6_SZEGED_2017_OPT_qDTS3_2	AX-90834914	AX-90834914	160426458	Founder_prob	Haplotype_probs
-17.4912	5.93728	-2.946	EP1_inra	female_flowering_d6_SZEGED_2017_OPT_qDTS3_2	AX-90834914	AX-90834914	160426458	Founder_prob	Haplotype_probs
1.52406	7.54923	0.201882	D105_inra	female_flowering_d6_SZEGED_2017_OPT_qDTS3_2	AX-90834914	AX-90834914	160426458	Founder_prob	Haplotype_probs
17.3827	7.98019	2.17823	W117_inra	female_flowering_d6_SZEGED_2017_OPT_qDTS3_2	AX-90834914	AX-90834914	160426458	Founder_prob	Haplotype_probs
19.4236	4.94365	3.929	B96	female_flowering_d6_SZEGED_2017_OPT_qDTS3_2	AX-90834914	AX-90834914	160426458	Founder_prob	Haplotype_probs
5.28914	4.59854	1.15018	DK63	female_flowering_d6_SZEGED_2017_OPT_qDTS3_2	AX-90834914	AX-90834914	160426458	Founder_prob	Haplotype_probs
1.24379	5.66937	0.219388	F492	female_flowering_d6_SZEGED_2017_OPT_qDTS3_2	AX-90834914	AX-90834914	160426458	Founder_prob	Haplotype_probs
-14.6515	6.42201	-2.28145	ND245	female_flowering_d6_SZEGED_2017_OPT_qDTS3_2	AX-90834914	AX-90834914	160426458	Founder_prob	Haplotype_probs
-13.1147	6.25475	-2.09675	VA85	female_flowering_d6_SZEGED_2017_OPT_qDTS3_2	AX-90834914	AX-90834914	160426458	Founder_prob	Haplotype_probs
8.76152	5.04782	1.7357	B73_inra	female_flowering_d6_SZEGED_2017_OPT_qDTS8	PZE-108085812	AX-91771730	146992030	Founder_prob	Haplotype_probs
11.2052	5.52455	2.02825	A632_usa	female_flowering_d6_SZEGED_2017_OPT_qDTS8	PZE-108085812	AX-91771730	146992030	Founder_prob	Haplotype_probs
-10.3363	5.22399	-1.97862	CO255_inra	female_flowering_d6_SZEGED_2017_OPT_qDTS8	PZE-108085812	AX-91771730	146992030	Founder_prob	Haplotype_probs
3.59016	5.94589	0.603804	FV252_inra	female_flowering_d6_SZEGED_2017_OPT_qDTS8	PZE-108085812	AX-91771730	146992030	Founder_prob	Haplotype_probs
19.762	6.30403	3.13482	OH43_inra	female_flowering_d6_SZEGED_2017_OPT_qDTS8	PZE-108085812	AX-91771730	146992030	Founder_prob	Haplotype_probs
-6.34096	5.5723	-1.13794	A654_inra	female_flowering_d6_SZEGED_2017_OPT_qDTS8	PZE-108085812	AX-91771730	146992030	Founder_prob	Haplotype_probs
-4.72357	5.98573	-0.789138	FV2_inra	female_flowering_d6_SZEGED_2017_OPT_qDTS8	PZE-108085812	AX-91771730	146992030	Founder_prob	Haplotype_probs
6.46312	7.02033	0.92063	C103_inra	female_flowering_d6_SZEGED_2017_OPT_qDTS8	PZE-108085812	AX-91771730	146992030	Founder_prob	Haplotype_probs
-28.083	6.93643	-4.04863	EP1_inra	female_flowering_d6_SZEGED_2017_OPT_qDTS8	PZE-108085812	AX-91771730	146992030	Founder_prob	Haplotype_probs
-10.4212	5.05423	-2.06187	D105_inra	female_flowering_d6_SZEGED_2017_OPT_qDTS8	PZE-108085812	AX-91771730	146992030	Founder_prob	Haplotype_probs
-12.3393	6.62654	-1.86209	W117_inra	female_flowering_d6_SZEGED_2017_OPT_qDTS8	PZE-108085812	AX-91771730	146992030	Founder_prob	Haplotype_probs
22.8462	10.2069	2.23832	B96	female_flowering_d6_SZEGED_2017_OPT_qDTS8	PZE-108085812	AX-91771730	146992030	Founder_prob	Haplotype_probs
-2.70905	5.2937	-0.511749	DK63	female_flowering_d6_SZEGED_2017_OPT_qDTS8	PZE-108085812	AX-91771730	146992030	Founder_prob	Haplotype_probs
17.1541	8.5256	2.01207	F492	female_flowering_d6_SZEGED_2017_OPT_qDTS8	PZE-108085812	AX-91771730	146992030	Founder_prob	Haplotype_probs
-6.39072	9.37382	-0.681763	ND245	female_flowering_d6_SZEGED_2017_OPT_qDTS8	PZE-108085812	AX-91771730	146992030	Founder_prob	Haplotype_probs
8.08603	6.2124	1.3016	VA85	female_flowering_d6_SZEGED_2017_OPT_qDTS8	PZE-108085812	AX-91771730	146992030	Founder_prob	Haplotype_probs
-1.5106	2.58071	-0.585341	B73_inra	grain_yield_15_STPAUL_2017_WD_qGYD1_1	AX-91465366	AX-91465300	64728836	Founder_prob	600K_SNP
-5.33039	2.19833	-2.42475	A632_usa	grain_yield_15_STPAUL_2017_WD_qGYD1_1	AX-91465366	AX-91465300	64728836	Founder_prob	600K_SNP
-6.51159	2.28491	-2.84983	CO255_inra	grain_yield_15_STPAUL_2017_WD_qGYD1_1	AX-91465366	AX-91465300	64728836	Founder_prob	600K_SNP
-4.63494	2.18461	-2.12164	FV252_inra	grain_yield_15_STPAUL_2017_WD_qGYD1_1	AX-91465366	AX-91465300	64728836	Founder_prob	600K_SNP
0.21556	2.33711	0.0922337	OH43_inra	grain_yield_15_STPAUL_2017_WD_qGYD1_1	AX-91465366	AX-91465300	64728836	Founder_prob	600K_SNP
0.402882	2.24724	0.179278	A654_inra	grain_yield_15_STPAUL_2017_WD_qGYD1_1	AX-91465366	AX-91465300	64728836	Founder_prob	600K_SNP
-0.31285	2.08725	-0.149886	FV2_inra	grain_yield_15_STPAUL_2017_WD_qGYD1_1	AX-91465366	AX-91465300	64728836	Founder_prob	600K_SNP
5.9886	2.26056	2.64917	C103_inra	grain_yield_15_STPAUL_2017_WD_qGYD1_1	AX-91465366	AX-91465300	64728836	Founder_prob	600K_SNP
6.19347	2.14597	2.88609	EP1_inra	grain_yield_15_STPAUL_2017_WD_qGYD1_1	AX-91465366	AX-91465300	64728836	Founder_prob	600K_SNP
-0.888458	1.86645	-0.476016	D105_inra	grain_yield_15_STPAUL_2017_WD_qGYD1_1	AX-91465366	AX-91465300	64728836	Founder_prob	600K_SNP
2.89662	1.79412	1.6145	W117_inra	grain_yield_15_STPAUL_2017_WD_qGYD1_1	AX-91465366	AX-91465300	64728836	Founder_prob	600K_SNP
6.00766	2.99188	2.00799	B96	grain_yield_15_STPAUL_2017_WD_qGYD1_1	AX-91465366	AX-91465300	64728836	Founder_prob	600K_SNP
-0.965283	1.99026	-0.485003	DK63	grain_yield_15_STPAUL_2017_WD_qGYD1_1	AX-91465366	AX-91465300	64728836	Founder_prob	600K_SNP
0.0629414	1.88627	0.0333682	F492	grain_yield_15_STPAUL_2017_WD_qGYD1_1	AX-91465366	AX-91465300	64728836	Founder_prob	600K_SNP
-2.69038	2.00829	-1.33964	ND245	grain_yield_15_STPAUL_2017_WD_qGYD1_1	AX-91465366	AX-91465300	64728836	Founder_prob	600K_SNP
5.50528	3.52016	1.56393	VA85	grain_yield_15_STPAUL_2017_WD_qGYD1_1	AX-91465366	AX-91465300	64728836	Founder_prob	600K_SNP
-0.326964	3.13941	-0.104148	B73_inra	grain_yield_15_STPAUL_2017_WD_qGYD1_2	AX-91439687	AX-91485119	173401292	Founder_prob	600K_SNP
6.54101	3.18615	2.05295	A632_usa	grain_yield_15_STPAUL_2017_WD_qGYD1_2	AX-91439687	AX-91485119	173401292	Founder_prob	600K_SNP
6.17846	2.76935	2.23101	CO255_inra	grain_yield_15_STPAUL_2017_WD_qGYD1_2	AX-91439687	AX-91485119	173401292	Founder_prob	600K_SNP
-0.357761	1.8985	-0.188445	FV252_inra	grain_yield_15_STPAUL_2017_WD_qGYD1_2	AX-91439687	AX-91485119	173401292	Founder_prob	600K_SNP
1.3936	2.23264	0.624193	OH43_inra	grain_yield_15_STPAUL_2017_WD_qGYD1_2	AX-91439687	AX-91485119	173401292	Founder_prob	600K_SNP
1.32848	2.03176	0.653857	A654_inra	grain_yield_15_STPAUL_2017_WD_qGYD1_2	AX-91439687	AX-91485119	173401292	Founder_prob	600K_SNP
-2.17699	2.14409	-1.01534	FV2_inra	grain_yield_15_STPAUL_2017_WD_qGYD1_2	AX-91439687	AX-91485119	173401292	Founder_prob	600K_SNP
1.90963	1.83906	1.03838	C103_inra	grain_yield_15_STPAUL_2017_WD_qGYD1_2	AX-91439687	AX-91485119	173401292	Founder_prob	600K_SNP
-2.51596	2.70491	-0.930145	EP1_inra	grain_yield_15_STPAUL_2017_WD_qGYD1_2	AX-91439687	AX-91485119	173401292	Founder_prob	600K_SNP
-7.17591	1.90479	-3.7673	D105_inra	grain_yield_15_STPAUL_2017_WD_qGYD1_2	AX-91439687	AX-91485119	173401292	Founder_prob	600K_SNP
1.37593	1.55971	0.882169	W117_inra	grain_yield_15_STPAUL_2017_WD_qGYD1_2	AX-91439687	AX-91485119	173401292	Founder_prob	600K_SNP
2.17421	2.36157	0.920661	B96	grain_yield_15_STPAUL_2017_WD_qGYD1_2	AX-91439687	AX-91485119	173401292	Founder_prob	600K_SNP
-0.336211	2.09304	-0.160633	DK63	grain_yield_15_STPAUL_2017_WD_qGYD1_2	AX-91439687	AX-91485119	173401292	Founder_prob	600K_SNP
0.537822	2.08903	0.25745	F492	grain_yield_15_STPAUL_2017_WD_qGYD1_2	AX-91439687	AX-91485119	173401292	Founder_prob	600K_SNP
-8.31056	2.61109	-3.18279	ND245	grain_yield_15_STPAUL_2017_WD_qGYD1_2	AX-91439687	AX-91485119	173401292	Founder_prob	600K_SNP
2.05967	4.20796	0.48947	VA85	grain_yield_15_STPAUL_2017_WD_qGYD1_2	AX-91439687	AX-91485119	173401292	Founder_prob	600K_SNP
-2.369	2.8908	-0.819494	B73_inra	grain_yield_15_STPAUL_2017_WD_qGYD5	PZE-105031901	AX-90925487	18196101	Founder_prob	600K_SNP
4.60049	2.0325	2.26347	A632_usa	grain_yield_15_STPAUL_2017_WD_qGYD5	PZE-105031901	AX-90925487	18196101	Founder_prob	600K_SNP
-5.82156	2.33392	-2.49433	CO255_inra	grain_yield_15_STPAUL_2017_WD_qGYD5	PZE-105031901	AX-90925487	18196101	Founder_prob	600K_SNP
-0.292779	1.68753	-0.173496	FV252_inra	grain_yield_15_STPAUL_2017_WD_qGYD5	PZE-105031901	AX-90925487	18196101	Founder_prob	600K_SNP
4.02144	2.7554	1.45948	OH43_inra	grain_yield_15_STPAUL_2017_WD_qGYD5	PZE-105031901	AX-90925487	18196101	Founder_prob	600K_SNP
-2.47781	1.80288	-1.37436	A654_inra	grain_yield_15_STPAUL_2017_WD_qGYD5	PZE-105031901	AX-90925487	18196101	Founder_prob	600K_SNP
5.19341	2.28514	2.27269	FV2_inra	grain_yield_15_STPAUL_2017_WD_qGYD5	PZE-105031901	AX-90925487	18196101	Founder_prob	600K_SNP
3.85224	2.76761	1.3919	C103_inra	grain_yield_15_STPAUL_2017_WD_qGYD5	PZE-105031901	AX-90925487	18196101	Founder_prob	600K_SNP
-2.04305	2.87309	-0.7111	EP1_inra	grain_yield_15_STPAUL_2017_WD_qGYD5	PZE-105031901	AX-90925487	18196101	Founder_prob	600K_SNP
-2.2816	1.8619	-1.22541	D105_inra	grain_yield_15_STPAUL_2017_WD_qGYD5	PZE-105031901	AX-90925487	18196101	Founder_prob	600K_SNP
-2.5561	2.42913	-1.05227	W117_inra	grain_yield_15_STPAUL_2017_WD_qGYD5	PZE-105031901	AX-90925487	18196101	Founder_prob	600K_SNP
-1.4001	3.39305	-0.412636	B96	grain_yield_15_STPAUL_2017_WD_qGYD5	PZE-105031901	AX-90925487	18196101	Founder_prob	600K_SNP
-1.44049	2.07467	-0.694321	DK63	grain_yield_15_STPAUL_2017_WD_qGYD5	PZE-105031901	AX-90925487	18196101	Founder_prob	600K_SNP
4.75193	1.85112	2.56705	F492	grain_yield_15_STPAUL_2017_WD_qGYD5	PZE-105031901	AX-90925487	18196101	Founder_prob	600K_SNP
-4.93309	2.74647	-1.79616	ND245	grain_yield_15_STPAUL_2017_WD_qGYD5	PZE-105031901	AX-90925487	18196101	Founder_prob	600K_SNP
2.6553	2.77173	0.957994	VA85	grain_yield_15_STPAUL_2017_WD_qGYD5	PZE-105031901	AX-90925487	18196101	Founder_prob	600K_SNP
-0.266439	0.188686	-1.41207	B73_inra	harvest_grain_moisture_ALL_qHGM3_2	AX-90830981	AX-90830950	143969848	Founder_prob	600K_SNP
-0.355298	0.289153	-1.22875	A632_usa	harvest_grain_moisture_ALL_qHGM3_2	AX-90830981	AX-90830950	143969848	Founder_prob	600K_SNP
-0.470819	0.205841	-2.28729	CO255_inra	harvest_grain_moisture_ALL_qHGM3_2	AX-90830981	AX-90830950	143969848	Founder_prob	600K_SNP
-0.276893	0.19412	-1.4264	FV252_inra	harvest_grain_moisture_ALL_qHGM3_2	AX-90830981	AX-90830950	143969848	Founder_prob	600K_SNP
0.614015	0.147155	4.17258	OH43_inra	harvest_grain_moisture_ALL_qHGM3_2	AX-90830981	AX-90830950	143969848	Founder_prob	600K_SNP
-0.289351	0.18535	-1.56111	A654_inra	harvest_grain_moisture_ALL_qHGM3_2	AX-90830981	AX-90830950	143969848	Founder_prob	600K_SNP
0.116162	0.159246	0.729446	FV2_inra	harvest_grain_moisture_ALL_qHGM3_2	AX-90830981	AX-90830950	143969848	Founder_prob	600K_SNP
0.0502057	0.153547	0.326973	C103_inra	harvest_grain_moisture_ALL_qHGM3_2	AX-90830981	AX-90830950	143969848	Founder_prob	600K_SNP
-0.272587	0.196574	-1.38669	EP1_inra	harvest_grain_moisture_ALL_qHGM3_2	AX-90830981	AX-90830950	143969848	Founder_prob	600K_SNP
-0.0707081	0.218071	-0.324244	D105_inra	harvest_grain_moisture_ALL_qHGM3_2	AX-90830981	AX-90830950	143969848	Founder_prob	600K_SNP
0.354669	0.252035	1.40722	W117_inra	harvest_grain_moisture_ALL_qHGM3_2	AX-90830981	AX-90830950	143969848	Founder_prob	600K_SNP
0.490794	0.1717	2.85844	B96	harvest_grain_moisture_ALL_qHGM3_2	AX-90830981	AX-90830950	143969848	Founder_prob	600K_SNP
-0.0880227	0.134254	-0.655643	DK63	harvest_grain_moisture_ALL_qHGM3_2	AX-90830981	AX-90830950	143969848	Founder_prob	600K_SNP
0.0936491	0.173147	0.540865	F492	harvest_grain_moisture_ALL_qHGM3_2	AX-90830981	AX-90830950	143969848	Founder_prob	600K_SNP
-0.392975	0.163537	-2.40298	ND245	harvest_grain_moisture_ALL_qHGM3_2	AX-90830981	AX-90830950	143969848	Founder_prob	600K_SNP
0.220797	0.184916	1.19404	VA85	harvest_grain_moisture_ALL_qHGM3_2	AX-90830981	AX-90830950	143969848	Founder_prob	600K_SNP
0.0257011	0.188339	0.136462	B73_inra	harvest_grain_moisture_ALL_qHGM3_1	AX-90799820	AX-90799820	22276352	Founder_prob	Founder_probs
0.550922	0.324233	1.69915	A632_usa	harvest_grain_moisture_ALL_qHGM3_1	AX-90799820	AX-90799820	22276352	Founder_prob	Founder_probs
-0.676454	0.207251	-3.26393	CO255_inra	harvest_grain_moisture_ALL_qHGM3_1	AX-90799820	AX-90799820	22276352	Founder_prob	Founder_probs
-0.182784	0.213603	-0.855719	FV252_inra	harvest_grain_moisture_ALL_qHGM3_1	AX-90799820	AX-90799820	22276352	Founder_prob	Founder_probs
0.400477	0.176735	2.26597	OH43_inra	harvest_grain_moisture_ALL_qHGM3_1	AX-90799820	AX-90799820	22276352	Founder_prob	Founder_probs
-0.266232	0.162607	-1.63727	A654_inra	harvest_grain_moisture_ALL_qHGM3_1	AX-90799820	AX-90799820	22276352	Founder_prob	Founder_probs
0.236099	0.148811	1.58657	FV2_inra	harvest_grain_moisture_ALL_qHGM3_1	AX-90799820	AX-90799820	22276352	Founder_prob	Founder_probs
0.158441	0.174119	0.909962	C103_inra	harvest_grain_moisture_ALL_qHGM3_1	AX-90799820	AX-90799820	22276352	Founder_prob	Founder_probs
-0.464961	0.208169	-2.23357	EP1_inra	harvest_grain_moisture_ALL_qHGM3_1	AX-90799820	AX-90799820	22276352	Founder_prob	Founder_probs
-0.0301465	0.173867	-0.173389	D105_inra	harvest_grain_moisture_ALL_qHGM3_1	AX-90799820	AX-90799820	22276352	Founder_prob	Founder_probs
0.173045	0.229381	0.754403	W117_inra	harvest_grain_moisture_ALL_qHGM3_1	AX-90799820	AX-90799820	22276352	Founder_prob	Founder_probs
0.72235	0.171738	4.20611	B96	harvest_grain_moisture_ALL_qHGM3_1	AX-90799820	AX-90799820	22276352	Founder_prob	Founder_probs
0.0570385	0.144024	0.396034	DK63	harvest_grain_moisture_ALL_qHGM3_1	AX-90799820	AX-90799820	22276352	Founder_prob	Founder_probs
-0.277652	0.154775	-1.79391	F492	harvest_grain_moisture_ALL_qHGM3_1	AX-90799820	AX-90799820	22276352	Founder_prob	Founder_probs
-0.120229	0.163498	-0.735353	ND245	harvest_grain_moisture_ALL_qHGM3_1	AX-90799820	AX-90799820	22276352	Founder_prob	Founder_probs
-0.320456	0.188537	-1.6997	VA85	harvest_grain_moisture_ALL_qHGM3_1	AX-90799820	AX-90799820	22276352	Founder_prob	Founder_probs
-0.204534	0.290564	-0.703918	B73_inra	harvest_grain_moisture_ALL_qHGM3_2	PZE-103084819	PZE-103084819	141333098	Founder_prob	Founder_probs
-0.616598	0.208791	-2.95318	A632_usa	harvest_grain_moisture_ALL_qHGM3_2	PZE-103084819	PZE-103084819	141333098	Founder_prob	Founder_probs
-0.552518	0.197196	-2.80188	CO255_inra	harvest_grain_moisture_ALL_qHGM3_2	PZE-103084819	PZE-103084819	141333098	Founder_prob	Founder_probs
-0.195814	0.217562	-0.900039	FV252_inra	harvest_grain_moisture_ALL_qHGM3_2	PZE-103084819	PZE-103084819	141333098	Founder_prob	Founder_probs
0.50732	0.151194	3.35542	OH43_inra	harvest_grain_moisture_ALL_qHGM3_2	PZE-103084819	PZE-103084819	141333098	Founder_prob	Founder_probs
0.0742524	0.360895	0.205745	A654_inra	harvest_grain_moisture_ALL_qHGM3_2	PZE-103084819	PZE-103084819	141333098	Founder_prob	Founder_probs
0.10543	0.158712	0.664282	FV2_inra	harvest_grain_moisture_ALL_qHGM3_2	PZE-103084819	PZE-103084819	141333098	Founder_prob	Founder_probs
0.084539	0.152182	0.555511	C103_inra	harvest_grain_moisture_ALL_qHGM3_2	PZE-103084819	PZE-103084819	141333098	Founder_prob	Founder_probs
-0.20585	0.191091	-1.07723	EP1_inra	harvest_grain_moisture_ALL_qHGM3_2	PZE-103084819	PZE-103084819	141333098	Founder_prob	Founder_probs
0.040801	0.226958	0.179774	D105_inra	harvest_grain_moisture_ALL_qHGM3_2	PZE-103084819	PZE-103084819	141333098	Founder_prob	Founder_probs
0.332771	0.274806	1.21093	W117_inra	harvest_grain_moisture_ALL_qHGM3_2	PZE-103084819	PZE-103084819	141333098	Founder_prob	Founder_probs
0.429688	0.158382	2.71298	B96	harvest_grain_moisture_ALL_qHGM3_2	PZE-103084819	PZE-103084819	141333098	Founder_prob	Founder_probs
-0.0805368	0.135689	-0.593541	DK63	harvest_grain_moisture_ALL_qHGM3_2	PZE-103084819	PZE-103084819	141333098	Founder_prob	Founder_probs
0.284021	0.175745	1.6161	F492	harvest_grain_moisture_ALL_qHGM3_2	PZE-103084819	PZE-103084819	141333098	Founder_prob	Founder_probs
-0.417772	0.169475	-2.46509	ND245	harvest_grain_moisture_ALL_qHGM3_2	PZE-103084819	PZE-103084819	141333098	Founder_prob	Founder_probs
0.260206	0.194021	1.34112	VA85	harvest_grain_moisture_ALL_qHGM3_2	PZE-103084819	PZE-103084819	141333098	Founder_prob	Founder_probs
-0.344143	0.188007	-1.83048	B73_inra	harvest_grain_moisture_ALL_qHGM3_2	AX-91579535	AX-90829452	138469858	Founder_prob	Haplotype_probs
-0.381607	0.289657	-1.31745	A632_usa	harvest_grain_moisture_ALL_qHGM3_2	AX-91579535	AX-90829452	138469858	Founder_prob	Haplotype_probs
-0.505683	0.19524	-2.59007	CO255_inra	harvest_grain_moisture_ALL_qHGM3_2	AX-91579535	AX-90829452	138469858	Founder_prob	Haplotype_probs
-0.145045	0.184312	-0.786952	FV252_inra	harvest_grain_moisture_ALL_qHGM3_2	AX-91579535	AX-90829452	138469858	Founder_prob	Haplotype_probs
0.482645	0.15901	3.03531	OH43_inra	harvest_grain_moisture_ALL_qHGM3_2	AX-91579535	AX-90829452	138469858	Founder_prob	Haplotype_probs
-0.388892	0.213566	-1.82094	A654_inra	harvest_grain_moisture_ALL_qHGM3_2	AX-91579535	AX-90829452	138469858	Founder_prob	Haplotype_probs
0.162954	0.159716	1.02028	FV2_inra	harvest_grain_moisture_ALL_qHGM3_2	AX-91579535	AX-90829452	138469858	Founder_prob	Haplotype_probs
0.0545276	0.147539	0.369582	C103_inra	harvest_grain_moisture_ALL_qHGM3_2	AX-91579535	AX-90829452	138469858	Founder_prob	Haplotype_probs
-0.0854217	0.192439	-0.44389	EP1_inra	harvest_grain_moisture_ALL_qHGM3_2	AX-91579535	AX-90829452	138469858	Founder_prob	Haplotype_probs
-0.0570813	0.217533	-0.262403	D105_inra	harvest_grain_moisture_ALL_qHGM3_2	AX-91579535	AX-90829452	138469858	Founder_prob	Haplotype_probs
0.367768	0.252625	1.45578	W117_inra	harvest_grain_moisture_ALL_qHGM3_2	AX-91579535	AX-90829452	138469858	Founder_prob	Haplotype_probs
0.427162	0.156959	2.72149	B96	harvest_grain_moisture_ALL_qHGM3_2	AX-91579535	AX-90829452	138469858	Founder_prob	Haplotype_probs
-0.0490119	0.141492	-0.346393	DK63	harvest_grain_moisture_ALL_qHGM3_2	AX-91579535	AX-90829452	138469858	Founder_prob	Haplotype_probs
0.277696	0.177243	1.56676	F492	harvest_grain_moisture_ALL_qHGM3_2	AX-91579535	AX-90829452	138469858	Founder_prob	Haplotype_probs
-0.421472	0.16086	-2.62011	ND245	harvest_grain_moisture_ALL_qHGM3_2	AX-91579535	AX-90829452	138469858	Founder_prob	Haplotype_probs
0.177569	0.203934	0.870717	VA85	harvest_grain_moisture_ALL_qHGM3_2	AX-91579535	AX-90829452	138469858	Founder_prob	Haplotype_probs
0.0825423	0.207099	0.398564	B73_inra	harvest_grain_moisture_BLOIS_2014_OPT_qHGM3_1	AX-91556625	AX-91440382	16418140	Founder_prob	600K_SNP
0.128905	0.275526	0.467851	A632_usa	harvest_grain_moisture_BLOIS_2014_OPT_qHGM3_1	AX-91556625	AX-91440382	16418140	Founder_prob	600K_SNP
-0.544004	0.240039	-2.26632	CO255_inra	harvest_grain_moisture_BLOIS_2014_OPT_qHGM3_1	AX-91556625	AX-91440382	16418140	Founder_prob	600K_SNP
-0.183372	0.23984	-0.76456	FV252_inra	harvest_grain_moisture_BLOIS_2014_OPT_qHGM3_1	AX-91556625	AX-91440382	16418140	Founder_prob	600K_SNP
0.233407	0.177003	1.31866	OH43_inra	harvest_grain_moisture_BLOIS_2014_OPT_qHGM3_1	AX-91556625	AX-91440382	16418140	Founder_prob	600K_SNP
-0.205282	0.190437	-1.07795	A654_inra	harvest_grain_moisture_BLOIS_2014_OPT_qHGM3_1	AX-91556625	AX-91440382	16418140	Founder_prob	600K_SNP
0.206272	0.165134	1.24912	FV2_inra	harvest_grain_moisture_BLOIS_2014_OPT_qHGM3_1	AX-91556625	AX-91440382	16418140	Founder_prob	600K_SNP
-0.00357145	0.180535	-0.0197826	C103_inra	harvest_grain_moisture_BLOIS_2014_OPT_qHGM3_1	AX-91556625	AX-91440382	16418140	Founder_prob	600K_SNP
0.336272	1.17464	0.286276	EP1_inra	harvest_grain_moisture_BLOIS_2014_OPT_qHGM3_1	AX-91556625	AX-91440382	16418140	Founder_prob	600K_SNP
-0.400211	0.172793	-2.31613	D105_inra	harvest_grain_moisture_BLOIS_2014_OPT_qHGM3_1	AX-91556625	AX-91440382	16418140	Founder_prob	600K_SNP
-0.0303748	0.230173	-0.131965	W117_inra	harvest_grain_moisture_BLOIS_2014_OPT_qHGM3_1	AX-91556625	AX-91440382	16418140	Founder_prob	600K_SNP
0.652157	0.214485	3.04057	B96	harvest_grain_moisture_BLOIS_2014_OPT_qHGM3_1	AX-91556625	AX-91440382	16418140	Founder_prob	600K_SNP
0.34532	0.146429	2.35828	DK63	harvest_grain_moisture_BLOIS_2014_OPT_qHGM3_1	AX-91556625	AX-91440382	16418140	Founder_prob	600K_SNP
-0.273141	0.164216	-1.6633	F492	harvest_grain_moisture_BLOIS_2014_OPT_qHGM3_1	AX-91556625	AX-91440382	16418140	Founder_prob	600K_SNP
0.263997	0.172941	1.52651	ND245	harvest_grain_moisture_BLOIS_2014_OPT_qHGM3_1	AX-91556625	AX-91440382	16418140	Founder_prob	600K_SNP
-0.165816	0.180497	-0.918661	VA85	harvest_grain_moisture_BLOIS_2014_OPT_qHGM3_1	AX-91556625	AX-91440382	16418140	Founder_prob	600K_SNP
-0.0668681	0.247035	-0.270682	B73_inra	harvest_grain_moisture_GRANEROS_2015_OPT_qHGM2	AX-90784366	AX-90784366	210205273	Founder_prob	Founder_probs
0.146436	0.189401	0.77315	A632_usa	harvest_grain_moisture_GRANEROS_2015_OPT_qHGM2	AX-90784366	AX-90784366	210205273	Founder_prob	Founder_probs
0.44333	0.159123	2.78609	CO255_inra	harvest_grain_moisture_GRANEROS_2015_OPT_qHGM2	AX-90784366	AX-90784366	210205273	Founder_prob	Founder_probs
-0.320619	0.180537	-1.77592	FV252_inra	harvest_grain_moisture_GRANEROS_2015_OPT_qHGM2	AX-90784366	AX-90784366	210205273	Founder_prob	Founder_probs
-0.247758	0.1575	-1.57306	OH43_inra	harvest_grain_moisture_GRANEROS_2015_OPT_qHGM2	AX-90784366	AX-90784366	210205273	Founder_prob	Founder_probs
-0.0785693	0.151178	-0.519713	A654_inra	harvest_grain_moisture_GRANEROS_2015_OPT_qHGM2	AX-90784366	AX-90784366	210205273	Founder_prob	Founder_probs
0.355931	0.286125	1.24397	FV2_inra	harvest_grain_moisture_GRANEROS_2015_OPT_qHGM2	AX-90784366	AX-90784366	210205273	Founder_prob	Founder_probs
0.646109	0.219496	2.94361	C103_inra	harvest_grain_moisture_GRANEROS_2015_OPT_qHGM2	AX-90784366	AX-90784366	210205273	Founder_prob	Founder_probs
-0.0628722	0.187237	-0.335789	EP1_inra	harvest_grain_moisture_GRANEROS_2015_OPT_qHGM2	AX-90784366	AX-90784366	210205273	Founder_prob	Founder_probs
-0.29819	0.179855	-1.65795	D105_inra	harvest_grain_moisture_GRANEROS_2015_OPT_qHGM2	AX-90784366	AX-90784366	210205273	Founder_prob	Founder_probs
5.21735	2.34615	2.22379	W117_inra	harvest_grain_moisture_GRANEROS_2015_OPT_qHGM2	AX-90784366	AX-90784366	210205273	Founder_prob	Founder_probs
-0.325586	0.174964	-1.86087	B96	harvest_grain_moisture_GRANEROS_2015_OPT_qHGM2	AX-90784366	AX-90784366	210205273	Founder_prob	Founder_probs
0.335582	0.124578	2.69376	DK63	harvest_grain_moisture_GRANEROS_2015_OPT_qHGM2	AX-90784366	AX-90784366	210205273	Founder_prob	Founder_probs
0.133707	0.141414	0.9455	F492	harvest_grain_moisture_GRANEROS_2015_OPT_qHGM2	AX-90784366	AX-90784366	210205273	Founder_prob	Founder_probs
-0.261122	0.148774	-1.75515	ND245	harvest_grain_moisture_GRANEROS_2015_OPT_qHGM2	AX-90784366	AX-90784366	210205273	Founder_prob	Founder_probs
-0.537092	0.169068	-3.17678	VA85	harvest_grain_moisture_GRANEROS_2015_OPT_qHGM2	AX-90784366	AX-90784366	210205273	Founder_prob	Founder_probs
4.77016	4.99588	0.954819	B73_inra	male_flowering_d6_ALL_qDTA3_2	AX-90835099	AX-90835093	161296968	Founder_prob	600K_SNP
-3.77005	6.15014	-0.613002	A632_usa	male_flowering_d6_ALL_qDTA3_2	AX-90835099	AX-90835093	161296968	Founder_prob	600K_SNP
-11.3051	4.90049	-2.30693	CO255_inra	male_flowering_d6_ALL_qDTA3_2	AX-90835099	AX-90835093	161296968	Founder_prob	600K_SNP
-17.6362	5.58799	-3.15609	FV252_inra	male_flowering_d6_ALL_qDTA3_2	AX-90835099	AX-90835093	161296968	Founder_prob	600K_SNP
13.3453	3.7842	3.52658	OH43_inra	male_flowering_d6_ALL_qDTA3_2	AX-90835099	AX-90835093	161296968	Founder_prob	600K_SNP
-2.67804	5.91016	-0.453124	A654_inra	male_flowering_d6_ALL_qDTA3_2	AX-90835099	AX-90835093	161296968	Founder_prob	600K_SNP
-6.87001	4.40938	-1.55804	FV2_inra	male_flowering_d6_ALL_qDTA3_2	AX-90835099	AX-90835093	161296968	Founder_prob	600K_SNP
2.79331	3.92358	0.711928	C103_inra	male_flowering_d6_ALL_qDTA3_2	AX-90835099	AX-90835093	161296968	Founder_prob	600K_SNP
-19.5242	4.3989	-4.43843	EP1_inra	male_flowering_d6_ALL_qDTA3_2	AX-90835099	AX-90835093	161296968	Founder_prob	600K_SNP
-8.28119	5.25656	-1.5754	D105_inra	male_flowering_d6_ALL_qDTA3_2	AX-90835099	AX-90835093	161296968	Founder_prob	600K_SNP
-1.5312	6.27616	-0.243971	W117_inra	male_flowering_d6_ALL_qDTA3_2	AX-90835099	AX-90835093	161296968	Founder_prob	600K_SNP
18.3198	3.54726	5.1645	B96	male_flowering_d6_ALL_qDTA3_2	AX-90835099	AX-90835093	161296968	Founder_prob	600K_SNP
3.77416	3.35937	1.12347	DK63	male_flowering_d6_ALL_qDTA3_2	AX-90835099	AX-90835093	161296968	Founder_prob	600K_SNP
1.15897	4.05704	0.285669	F492	male_flowering_d6_ALL_qDTA3_2	AX-90835099	AX-90835093	161296968	Founder_prob	600K_SNP
-2.59451	4.42858	-0.585856	ND245	male_flowering_d6_ALL_qDTA3_2	AX-90835099	AX-90835093	161296968	Founder_prob	600K_SNP
-0.604781	4.79112	-0.12623	VA85	male_flowering_d6_ALL_qDTA3_2	AX-90835099	AX-90835093	161296968	Founder_prob	600K_SNP
13.8679	3.57642	3.8776	B73_inra	male_flowering_d6_ALL_qDTA8	AX-91100991	AX-91100867	128360284	Founder_prob	600K_SNP
6.32583	5.24871	1.20522	A632_usa	male_flowering_d6_ALL_qDTA8	AX-91100991	AX-91100867	128360284	Founder_prob	600K_SNP
-4.99666	3.54767	-1.40843	CO255_inra	male_flowering_d6_ALL_qDTA8	AX-91100991	AX-91100867	128360284	Founder_prob	600K_SNP
9.91266	4.17663	2.37337	FV252_inra	male_flowering_d6_ALL_qDTA8	AX-91100991	AX-91100867	128360284	Founder_prob	600K_SNP
5.86665	6.01379	0.975533	OH43_inra	male_flowering_d6_ALL_qDTA8	AX-91100991	AX-91100867	128360284	Founder_prob	600K_SNP
-7.4541	3.38609	-2.20139	A654_inra	male_flowering_d6_ALL_qDTA8	AX-91100991	AX-91100867	128360284	Founder_prob	600K_SNP
-2.66805	3.84388	-0.694105	FV2_inra	male_flowering_d6_ALL_qDTA8	AX-91100991	AX-91100867	128360284	Founder_prob	600K_SNP
6.32393	5.36882	1.1779	C103_inra	male_flowering_d6_ALL_qDTA8	AX-91100991	AX-91100867	128360284	Founder_prob	600K_SNP
-16.6538	4.91471	-3.38855	EP1_inra	male_flowering_d6_ALL_qDTA8	AX-91100991	AX-91100867	128360284	Founder_prob	600K_SNP
-8.74791	3.65912	-2.39071	D105_inra	male_flowering_d6_ALL_qDTA8	AX-91100991	AX-91100867	128360284	Founder_prob	600K_SNP
0.0261407	4.26773	0.0061252	W117_inra	male_flowering_d6_ALL_qDTA8	AX-91100991	AX-91100867	128360284	Founder_prob	600K_SNP
18.0477	5.83973	3.09051	B96	male_flowering_d6_ALL_qDTA8	AX-91100991	AX-91100867	128360284	Founder_prob	600K_SNP
-16.3571	4.61481	-3.54449	DK63	male_flowering_d6_ALL_qDTA8	AX-91100991	AX-91100867	128360284	Founder_prob	600K_SNP
7.59453	6.15501	1.23388	F492	male_flowering_d6_ALL_qDTA8	AX-91100991	AX-91100867	128360284	Founder_prob	600K_SNP
-14.903	5.06902	-2.94001	ND245	male_flowering_d6_ALL_qDTA8	AX-91100991	AX-91100867	128360284	Founder_prob	600K_SNP
18.2205	5.1149	3.56225	VA85	male_flowering_d6_ALL_qDTA8	AX-91100991	AX-91100867	128360284	Founder_prob	600K_SNP
4.40322	5.13405	0.85765	B73_inra	male_flowering_d6_ALL_qDTA3_2	AX-90834914	AX-90834914	160426458	Founder_prob	Founder_probs
-0.401752	6.14133	-0.0654177	A632_usa	male_flowering_d6_ALL_qDTA3_2	AX-90834914	AX-90834914	160426458	Founder_prob	Founder_probs
-14.0604	5.18316	-2.71271	CO255_inra	male_flowering_d6_ALL_qDTA3_2	AX-90834914	AX-90834914	160426458	Founder_prob	Founder_probs
-18.2555	5.58694	-3.26753	FV252_inra	male_flowering_d6_ALL_qDTA3_2	AX-90834914	AX-90834914	160426458	Founder_prob	Founder_probs
12.8429	3.64614	3.52234	OH43_inra	male_flowering_d6_ALL_qDTA3_2	AX-90834914	AX-90834914	160426458	Founder_prob	Founder_probs
-3.58947	5.67641	-0.632348	A654_inra	male_flowering_d6_ALL_qDTA3_2	AX-90834914	AX-90834914	160426458	Founder_prob	Founder_probs
-6.84776	4.40252	-1.55542	FV2_inra	male_flowering_d6_ALL_qDTA3_2	AX-90834914	AX-90834914	160426458	Founder_prob	Founder_probs
3.49446	4.08684	0.855052	C103_inra	male_flowering_d6_ALL_qDTA3_2	AX-90834914	AX-90834914	160426458	Founder_prob	Founder_probs
-19.8232	4.39504	-4.51037	EP1_inra	male_flowering_d6_ALL_qDTA3_2	AX-90834914	AX-90834914	160426458	Founder_prob	Founder_probs
-6.68166	5.402	-1.23689	D105_inra	male_flowering_d6_ALL_qDTA3_2	AX-90834914	AX-90834914	160426458	Founder_prob	Founder_probs
0.745487	6.0194	0.123847	W117_inra	male_flowering_d6_ALL_qDTA3_2	AX-90834914	AX-90834914	160426458	Founder_prob	Founder_probs
18.4918	3.55792	5.19738	B96	male_flowering_d6_ALL_qDTA3_2	AX-90834914	AX-90834914	160426458	Founder_prob	Founder_probs
3.80727	3.3581	1.13376	DK63	male_flowering_d6_ALL_qDTA3_2	AX-90834914	AX-90834914	160426458	Founder_prob	Founder_probs
1.08562	4.03913	0.268775	F492	male_flowering_d6_ALL_qDTA3_2	AX-90834914	AX-90834914	160426458	Founder_prob	Founder_probs
-3.77657	4.54317	-0.831264	ND245	male_flowering_d6_ALL_qDTA3_2	AX-90834914	AX-90834914	160426458	Founder_prob	Founder_probs
-2.818	4.50209	-0.625932	VA85	male_flowering_d6_ALL_qDTA3_2	AX-90834914	AX-90834914	160426458	Founder_prob	Founder_probs
11.5148	3.45619	3.33166	B73_inra	male_flowering_d6_ALL_qDTA8	AX-91102763	AX-91102763	135165296	Founder_prob	Founder_probs
10.5284	5.40282	1.94869	A632_usa	male_flowering_d6_ALL_qDTA8	AX-91102763	AX-91102763	135165296	Founder_prob	Founder_probs
-5.84543	3.27948	-1.78243	CO255_inra	male_flowering_d6_ALL_qDTA8	AX-91102763	AX-91102763	135165296	Founder_prob	Founder_probs
11.5761	4.47655	2.58595	FV252_inra	male_flowering_d6_ALL_qDTA8	AX-91102763	AX-91102763	135165296	Founder_prob	Founder_probs
9.59527	7.48902	1.28125	OH43_inra	male_flowering_d6_ALL_qDTA8	AX-91102763	AX-91102763	135165296	Founder_prob	Founder_probs
-8.09146	4.97442	-1.62661	A654_inra	male_flowering_d6_ALL_qDTA8	AX-91102763	AX-91102763	135165296	Founder_prob	Founder_probs
-7.22701	3.95591	-1.82689	FV2_inra	male_flowering_d6_ALL_qDTA8	AX-91102763	AX-91102763	135165296	Founder_prob	Founder_probs
8.39887	4.57894	1.83424	C103_inra	male_flowering_d6_ALL_qDTA8	AX-91102763	AX-91102763	135165296	Founder_prob	Founder_probs
-17.3142	4.77752	-3.62411	EP1_inra	male_flowering_d6_ALL_qDTA8	AX-91102763	AX-91102763	135165296	Founder_prob	Founder_probs
-8.94798	3.46614	-2.58154	D105_inra	male_flowering_d6_ALL_qDTA8	AX-91102763	AX-91102763	135165296	Founder_prob	Founder_probs
-2.73227	4.93854	-0.553255	W117_inra	male_flowering_d6_ALL_qDTA8	AX-91102763	AX-91102763	135165296	Founder_prob	Founder_probs
20.1396	6.41253	3.14066	B96	male_flowering_d6_ALL_qDTA8	AX-91102763	AX-91102763	135165296	Founder_prob	Founder_probs
-9.6032	4.53906	-2.11568	DK63	male_flowering_d6_ALL_qDTA8	AX-91102763	AX-91102763	135165296	Founder_prob	Founder_probs
6.65271	6.14863	1.08198	F492	male_flowering_d6_ALL_qDTA8	AX-91102763	AX-91102763	135165296	Founder_prob	Founder_probs
-13.0364	5.46753	-2.38434	ND245	male_flowering_d6_ALL_qDTA8	AX-91102763	AX-91102763	135165296	Founder_prob	Founder_probs
16.5389	4.71032	3.51121	VA85	male_flowering_d6_ALL_qDTA8	AX-91102763	AX-91102763	135165296	Founder_prob	Founder_probs
0.314198	4.99247	0.0629344	B73_inra	male_flowering_d6_ALL_qDTA9	AX-91146091	AX-91146091	118776019	Founder_prob	Founder_probs
-12.5787	5.09303	-2.4698	A632_usa	male_flowering_d6_ALL_qDTA9	AX-91146091	AX-91146091	118776019	Founder_prob	Founder_probs
-8.32977	3.68419	-2.26095	CO255_inra	male_flowering_d6_ALL_qDTA9	AX-91146091	AX-91146091	118776019	Founder_prob	Founder_probs
-6.17121	4.51995	-1.36533	FV252_inra	male_flowering_d6_ALL_qDTA9	AX-91146091	AX-91146091	118776019	Founder_prob	Founder_probs
-1.79063	4.51052	-0.396989	OH43_inra	male_flowering_d6_ALL_qDTA9	AX-91146091	AX-91146091	118776019	Founder_prob	Founder_probs
-1.3982	3.67905	-0.380043	A654_inra	male_flowering_d6_ALL_qDTA9	AX-91146091	AX-91146091	118776019	Founder_prob	Founder_probs
5.64312	4.92	1.14698	FV2_inra	male_flowering_d6_ALL_qDTA9	AX-91146091	AX-91146091	118776019	Founder_prob	Founder_probs
-3.1134	5.87025	-0.530369	C103_inra	male_flowering_d6_ALL_qDTA9	AX-91146091	AX-91146091	118776019	Founder_prob	Founder_probs
5.14994	4.35572	1.18234	EP1_inra	male_flowering_d6_ALL_qDTA9	AX-91146091	AX-91146091	118776019	Founder_prob	Founder_probs
4.07656	3.78765	1.07628	D105_inra	male_flowering_d6_ALL_qDTA9	AX-91146091	AX-91146091	118776019	Founder_prob	Founder_probs
14.1015	4.02767	3.50115	W117_inra	male_flowering_d6_ALL_qDTA9	AX-91146091	AX-91146091	118776019	Founder_prob	Founder_probs
20.4242	5.16449	3.95474	B96	male_flowering_d6_ALL_qDTA9	AX-91146091	AX-91146091	118776019	Founder_prob	Founder_probs
-6.55956	4.65193	-1.41007	DK63	male_flowering_d6_ALL_qDTA9	AX-91146091	AX-91146091	118776019	Founder_prob	Founder_probs
2.98695	4.86524	0.613937	F492	male_flowering_d6_ALL_qDTA9	AX-91146091	AX-91146091	118776019	Founder_prob	Founder_probs
2.73604	8.73565	0.313204	ND245	male_flowering_d6_ALL_qDTA9	AX-91146091	AX-91146091	118776019	Founder_prob	Founder_probs
-11.1246	4.15186	-2.67943	VA85	male_flowering_d6_ALL_qDTA9	AX-91146091	AX-91146091	118776019	Founder_prob	Founder_probs
9.36965	4.49551	2.08422	B73_inra	male_flowering_d6_ALL_qDTA3_1	AX-90796949	AX-91555688	11159770	Founder_prob	Haplotype_probs
-22.6665	5.18895	-4.36823	CO255_inra	male_flowering_d6_ALL_qDTA3_1	AX-90796949	AX-91555688	11159770	Founder_prob	Haplotype_probs
-8.77842	5.26459	-1.66745	FV252_inra	male_flowering_d6_ALL_qDTA3_1	AX-90796949	AX-91555688	11159770	Founder_prob	Haplotype_probs
4.74326	4.40757	1.07616	OH43_inra	male_flowering_d6_ALL_qDTA3_1	AX-90796949	AX-91555688	11159770	Founder_prob	Haplotype_probs
-1.62681	4.94147	-0.329215	A654_inra	male_flowering_d6_ALL_qDTA3_1	AX-90796949	AX-91555688	11159770	Founder_prob	Haplotype_probs
-5.897	3.88549	-1.5177	FV2_inra	male_flowering_d6_ALL_qDTA3_1	AX-90796949	AX-91555688	11159770	Founder_prob	Haplotype_probs
-0.00118187	4.21301	-0.000280529	C103_inra	male_flowering_d6_ALL_qDTA3_1	AX-90796949	AX-91555688	11159770	Founder_prob	Haplotype_probs
0.0288682	15.5657	0.0018546	EP1_inra	male_flowering_d6_ALL_qDTA3_1	AX-90796949	AX-91555688	11159770	Founder_prob	Haplotype_probs
-9.1634	4.98148	-1.83949	D105_inra	male_flowering_d6_ALL_qDTA3_1	AX-90796949	AX-91555688	11159770	Founder_prob	Haplotype_probs
7.14165	8.61965	0.828531	W117_inra	male_flowering_d6_ALL_qDTA3_1	AX-90796949	AX-91555688	11159770	Founder_prob	Haplotype_probs
12.3112	4.63223	2.65772	B96	male_flowering_d6_ALL_qDTA3_1	AX-90796949	AX-91555688	11159770	Founder_prob	Haplotype_probs
6.55328	3.21957	2.03545	DK63	male_flowering_d6_ALL_qDTA3_1	AX-90796949	AX-91555688	11159770	Founder_prob	Haplotype_probs
4.74796	3.77351	1.25823	F492	male_flowering_d6_ALL_qDTA3_1	AX-90796949	AX-91555688	11159770	Founder_prob	Haplotype_probs
4.88066	4.02576	1.21236	ND245	male_flowering_d6_ALL_qDTA3_1	AX-90796949	AX-91555688	11159770	Founder_prob	Haplotype_probs
-3.5114	5.25569	-0.668114	VA85	male_flowering_d6_ALL_qDTA3_1	AX-90796949	AX-91555688	11159770	Founder_prob	Haplotype_probs
4.40322	5.13405	0.85765	B73_inra	male_flowering_d6_ALL_qDTA3_2	AX-90834914	AX-90834914	160426458	Founder_prob	Haplotype_probs
-0.401752	6.14133	-0.0654177	A632_usa	male_flowering_d6_ALL_qDTA3_2	AX-90834914	AX-90834914	160426458	Founder_prob	Haplotype_probs
-14.0604	5.18316	-2.71271	CO255_inra	male_flowering_d6_ALL_qDTA3_2	AX-90834914	AX-90834914	160426458	Founder_prob	Haplotype_probs
-18.2555	5.58694	-3.26753	FV252_inra	male_flowering_d6_ALL_qDTA3_2	AX-90834914	AX-90834914	160426458	Founder_prob	Haplotype_probs
12.8429	3.64614	3.52234	OH43_inra	male_flowering_d6_ALL_qDTA3_2	AX-90834914	AX-90834914	160426458	Founder_prob	Haplotype_probs
-3.58947	5.67641	-0.632348	A654_inra	male_flowering_d6_ALL_qDTA3_2	AX-90834914	AX-90834914	160426458	Founder_prob	Haplotype_probs
-6.84776	4.40252	-1.55542	FV2_inra	male_flowering_d6_ALL_qDTA3_2	AX-90834914	AX-90834914	160426458	Founder_prob	Haplotype_probs
3.49446	4.08684	0.855052	C103_inra	male_flowering_d6_ALL_qDTA3_2	AX-90834914	AX-90834914	160426458	Founder_prob	Haplotype_probs
-19.8232	4.39504	-4.51037	EP1_inra	male_flowering_d6_ALL_qDTA3_2	AX-90834914	AX-90834914	160426458	Founder_prob	Haplotype_probs
-6.68166	5.402	-1.23689	D105_inra	male_flowering_d6_ALL_qDTA3_2	AX-90834914	AX-90834914	160426458	Founder_prob	Haplotype_probs
0.745487	6.0194	0.123847	W117_inra	male_flowering_d6_ALL_qDTA3_2	AX-90834914	AX-90834914	160426458	Founder_prob	Haplotype_probs
18.4918	3.55792	5.19738	B96	male_flowering_d6_ALL_qDTA3_2	AX-90834914	AX-90834914	160426458	Founder_prob	Haplotype_probs
3.80727	3.3581	1.13376	DK63	male_flowering_d6_ALL_qDTA3_2	AX-90834914	AX-90834914	160426458	Founder_prob	Haplotype_probs
1.08562	4.03913	0.268775	F492	male_flowering_d6_ALL_qDTA3_2	AX-90834914	AX-90834914	160426458	Founder_prob	Haplotype_probs
-3.77657	4.54317	-0.831264	ND245	male_flowering_d6_ALL_qDTA3_2	AX-90834914	AX-90834914	160426458	Founder_prob	Haplotype_probs
-2.818	4.50209	-0.625932	VA85	male_flowering_d6_ALL_qDTA3_2	AX-90834914	AX-90834914	160426458	Founder_prob	Haplotype_probs
9.6796	3.68258	2.62848	B73_inra	male_flowering_d6_ALL_qDTA8	AX-91102778	AX-91102704	135145003	Founder_prob	Haplotype_probs
9.72846	5.69364	1.70865	A632_usa	male_flowering_d6_ALL_qDTA8	AX-91102778	AX-91102704	135145003	Founder_prob	Haplotype_probs
-5.26875	3.44906	-1.52759	CO255_inra	male_flowering_d6_ALL_qDTA8	AX-91102778	AX-91102704	135145003	Founder_prob	Haplotype_probs
11.9165	4.57759	2.60322	FV252_inra	male_flowering_d6_ALL_qDTA8	AX-91102778	AX-91102704	135145003	Founder_prob	Haplotype_probs
8.79885	7.31254	1.20326	OH43_inra	male_flowering_d6_ALL_qDTA8	AX-91102778	AX-91102704	135145003	Founder_prob	Haplotype_probs
-7.72362	4.7112	-1.63942	A654_inra	male_flowering_d6_ALL_qDTA8	AX-91102778	AX-91102704	135145003	Founder_prob	Haplotype_probs
-3.8372	3.9096	-0.981481	FV2_inra	male_flowering_d6_ALL_qDTA8	AX-91102778	AX-91102704	135145003	Founder_prob	Haplotype_probs
6.33141	4.98065	1.2712	C103_inra	male_flowering_d6_ALL_qDTA8	AX-91102778	AX-91102704	135145003	Founder_prob	Haplotype_probs
-15.2077	4.74755	-3.20328	EP1_inra	male_flowering_d6_ALL_qDTA8	AX-91102778	AX-91102704	135145003	Founder_prob	Haplotype_probs
-6.56348	3.57163	-1.83767	D105_inra	male_flowering_d6_ALL_qDTA8	AX-91102778	AX-91102704	135145003	Founder_prob	Haplotype_probs
-4.39712	4.72484	-0.930639	W117_inra	male_flowering_d6_ALL_qDTA8	AX-91102778	AX-91102704	135145003	Founder_prob	Haplotype_probs
19.6538	6.55615	2.99776	B96	male_flowering_d6_ALL_qDTA8	AX-91102778	AX-91102704	135145003	Founder_prob	Haplotype_probs
-10.0035	4.61155	-2.16922	DK63	male_flowering_d6_ALL_qDTA8	AX-91102778	AX-91102704	135145003	Founder_prob	Haplotype_probs
6.98253	6.28683	1.11066	F492	male_flowering_d6_ALL_qDTA8	AX-91102778	AX-91102704	135145003	Founder_prob	Haplotype_probs
-13.185	5.59204	-2.35781	ND245	male_flowering_d6_ALL_qDTA8	AX-91102778	AX-91102704	135145003	Founder_prob	Haplotype_probs
16.9581	4.81764	3.52	VA85	male_flowering_d6_ALL_qDTA8	AX-91102778	AX-91102704	135145003	Founder_prob	Haplotype_probs
4.40105	5.74644	0.765873	B73_inra	male_flowering_d6_BLOIS_2014_OPT_qDTA3_2	AX-91583310	AX-90834914	160559294	Founder_prob	600K_SNP
-3.54666	6.65743	-0.532737	A632_usa	male_flowering_d6_BLOIS_2014_OPT_qDTA3_2	AX-91583310	AX-90834914	160559294	Founder_prob	600K_SNP
-11.1578	5.78316	-1.92935	CO255_inra	male_flowering_d6_BLOIS_2014_OPT_qDTA3_2	AX-91583310	AX-90834914	160559294	Founder_prob	600K_SNP
-20.7639	6.05043	-3.4318	FV252_inra	male_flowering_d6_BLOIS_2014_OPT_qDTA3_2	AX-91583310	AX-90834914	160559294	Founder_prob	600K_SNP
11.0508	4.13509	2.67246	OH43_inra	male_flowering_d6_BLOIS_2014_OPT_qDTA3_2	AX-91583310	AX-90834914	160559294	Founder_prob	600K_SNP
-5.41811	6.15914	-0.879686	A654_inra	male_flowering_d6_BLOIS_2014_OPT_qDTA3_2	AX-91583310	AX-90834914	160559294	Founder_prob	600K_SNP
-9.69383	5.02958	-1.92737	FV2_inra	male_flowering_d6_BLOIS_2014_OPT_qDTA3_2	AX-91583310	AX-90834914	160559294	Founder_prob	600K_SNP
7.17687	4.4339	1.61864	C103_inra	male_flowering_d6_BLOIS_2014_OPT_qDTA3_2	AX-91583310	AX-90834914	160559294	Founder_prob	600K_SNP
-21.0854	4.76827	-4.42203	EP1_inra	male_flowering_d6_BLOIS_2014_OPT_qDTA3_2	AX-91583310	AX-90834914	160559294	Founder_prob	600K_SNP
-3.10492	6.05985	-0.512375	D105_inra	male_flowering_d6_BLOIS_2014_OPT_qDTA3_2	AX-91583310	AX-90834914	160559294	Founder_prob	600K_SNP
-3.40556	6.53364	-0.521235	W117_inra	male_flowering_d6_BLOIS_2014_OPT_qDTA3_2	AX-91583310	AX-90834914	160559294	Founder_prob	600K_SNP
22.2918	3.98002	5.60092	B96	male_flowering_d6_BLOIS_2014_OPT_qDTA3_2	AX-91583310	AX-90834914	160559294	Founder_prob	600K_SNP
-1.10685	3.77727	-0.29303	DK63	male_flowering_d6_BLOIS_2014_OPT_qDTA3_2	AX-91583310	AX-90834914	160559294	Founder_prob	600K_SNP
1.69132	4.38188	0.385981	F492	male_flowering_d6_BLOIS_2014_OPT_qDTA3_2	AX-91583310	AX-90834914	160559294	Founder_prob	600K_SNP
-1.3994	5.16187	-0.271103	ND245	male_flowering_d6_BLOIS_2014_OPT_qDTA3_2	AX-91583310	AX-90834914	160559294	Founder_prob	600K_SNP
2.90615	4.95322	0.586719	VA85	male_flowering_d6_BLOIS_2014_OPT_qDTA3_2	AX-91583310	AX-90834914	160559294	Founder_prob	600K_SNP
14.8439	3.32865	4.45943	B73_inra	male_flowering_d6_BLOIS_2014_OPT_qDTA8	AX-90635917	AX-91769990	137872380	Founder_prob	600K_SNP
9.02872	5.83827	1.54647	A632_usa	male_flowering_d6_BLOIS_2014_OPT_qDTA8	AX-90635917	AX-91769990	137872380	Founder_prob	600K_SNP
-5.89549	3.75159	-1.57146	CO255_inra	male_flowering_d6_BLOIS_2014_OPT_qDTA8	AX-90635917	AX-91769990	137872380	Founder_prob	600K_SNP
14.2345	5.66123	2.51439	FV252_inra	male_flowering_d6_BLOIS_2014_OPT_qDTA8	AX-90635917	AX-91769990	137872380	Founder_prob	600K_SNP
-4.58961	4.60403	-0.996868	A654_inra	male_flowering_d6_BLOIS_2014_OPT_qDTA8	AX-90635917	AX-91769990	137872380	Founder_prob	600K_SNP
-7.51456	4.62955	-1.62317	FV2_inra	male_flowering_d6_BLOIS_2014_OPT_qDTA8	AX-90635917	AX-91769990	137872380	Founder_prob	600K_SNP
6.76437	5.05292	1.3387	C103_inra	male_flowering_d6_BLOIS_2014_OPT_qDTA8	AX-90635917	AX-91769990	137872380	Founder_prob	600K_SNP
-17.1697	4.69029	-3.66069	EP1_inra	male_flowering_d6_BLOIS_2014_OPT_qDTA8	AX-90635917	AX-91769990	137872380	Founder_prob	600K_SNP
-13.2027	4.1879	-3.15258	D105_inra	male_flowering_d6_BLOIS_2014_OPT_qDTA8	AX-90635917	AX-91769990	137872380	Founder_prob	600K_SNP
-1.2035	5.50446	-0.218641	W117_inra	male_flowering_d6_BLOIS_2014_OPT_qDTA8	AX-90635917	AX-91769990	137872380	Founder_prob	600K_SNP
22.6595	9.15291	2.47566	B96	male_flowering_d6_BLOIS_2014_OPT_qDTA8	AX-90635917	AX-91769990	137872380	Founder_prob	600K_SNP
-9.55475	5.03908	-1.89613	DK63	male_flowering_d6_BLOIS_2014_OPT_qDTA8	AX-90635917	AX-91769990	137872380	Founder_prob	600K_SNP
6.51135	6.82821	0.953595	F492	male_flowering_d6_BLOIS_2014_OPT_qDTA8	AX-90635917	AX-91769990	137872380	Founder_prob	600K_SNP
-16.9869	6.29273	-2.69945	ND245	male_flowering_d6_BLOIS_2014_OPT_qDTA8	AX-90635917	AX-91769990	137872380	Founder_prob	600K_SNP
19.0399	5.58197	3.41096	VA85	male_flowering_d6_BLOIS_2014_OPT_qDTA8	AX-90635917	AX-91769990	137872380	Founder_prob	600K_SNP
2.28895	5.3284	0.429576	B73_inra	male_flowering_d6_BLOIS_2014_OPT_qDTA3_2	AX-90834556	AX-90834556	158988768	Founder_prob	Founder_probs
-6.12405	6.90242	-0.887232	A632_usa	male_flowering_d6_BLOIS_2014_OPT_qDTA3_2	AX-90834556	AX-90834556	158988768	Founder_prob	Founder_probs
-10.2618	5.53761	-1.85311	CO255_inra	male_flowering_d6_BLOIS_2014_OPT_qDTA3_2	AX-90834556	AX-90834556	158988768	Founder_prob	Founder_probs
-20.1172	5.98431	-3.36166	FV252_inra	male_flowering_d6_BLOIS_2014_OPT_qDTA3_2	AX-90834556	AX-90834556	158988768	Founder_prob	Founder_probs
11.977	3.89988	3.07111	OH43_inra	male_flowering_d6_BLOIS_2014_OPT_qDTA3_2	AX-90834556	AX-90834556	158988768	Founder_prob	Founder_probs
-5.96633	6.36265	-0.937713	A654_inra	male_flowering_d6_BLOIS_2014_OPT_qDTA3_2	AX-90834556	AX-90834556	158988768	Founder_prob	Founder_probs
-10.9498	4.89573	-2.23661	FV2_inra	male_flowering_d6_BLOIS_2014_OPT_qDTA3_2	AX-90834556	AX-90834556	158988768	Founder_prob	Founder_probs
7.81275	4.52379	1.72703	C103_inra	male_flowering_d6_BLOIS_2014_OPT_qDTA3_2	AX-90834556	AX-90834556	158988768	Founder_prob	Founder_probs
-19.8201	4.75481	-4.16843	EP1_inra	male_flowering_d6_BLOIS_2014_OPT_qDTA3_2	AX-90834556	AX-90834556	158988768	Founder_prob	Founder_probs
-2.34299	6.26051	-0.374249	D105_inra	male_flowering_d6_BLOIS_2014_OPT_qDTA3_2	AX-90834556	AX-90834556	158988768	Founder_prob	Founder_probs
-3.74785	6.42905	-0.582956	W117_inra	male_flowering_d6_BLOIS_2014_OPT_qDTA3_2	AX-90834556	AX-90834556	158988768	Founder_prob	Founder_probs
22.0319	3.85229	5.71916	B96	male_flowering_d6_BLOIS_2014_OPT_qDTA3_2	AX-90834556	AX-90834556	158988768	Founder_prob	Founder_probs
-2.67241	3.84672	-0.694723	DK63	male_flowering_d6_BLOIS_2014_OPT_qDTA3_2	AX-90834556	AX-90834556	158988768	Founder_prob	Founder_probs
3.94738	4.19798	0.940305	F492	male_flowering_d6_BLOIS_2014_OPT_qDTA3_2	AX-90834556	AX-90834556	158988768	Founder_prob	Founder_probs
-1.07213	5.11061	-0.209784	ND245	male_flowering_d6_BLOIS_2014_OPT_qDTA3_2	AX-90834556	AX-90834556	158988768	Founder_prob	Founder_probs
0.572934	5.05508	0.113338	VA85	male_flowering_d6_BLOIS_2014_OPT_qDTA3_2	AX-90834556	AX-90834556	158988768	Founder_prob	Founder_probs
20.4457	3.9967	5.11565	B73_inra	male_flowering_d6_BLOIS_2014_OPT_qDTA8	PZA01038.1	PZA01038.1	128420026	Founder_prob	Founder_probs
3.46306	5.9967	0.577494	A632_usa	male_flowering_d6_BLOIS_2014_OPT_qDTA8	PZA01038.1	PZA01038.1	128420026	Founder_prob	Founder_probs
-6.28934	3.79354	-1.65791	CO255_inra	male_flowering_d6_BLOIS_2014_OPT_qDTA8	PZA01038.1	PZA01038.1	128420026	Founder_prob	Founder_probs
8.0834	4.60217	1.75643	FV252_inra	male_flowering_d6_BLOIS_2014_OPT_qDTA8	PZA01038.1	PZA01038.1	128420026	Founder_prob	Founder_probs
13.9196	7.45171	1.86798	OH43_inra	male_flowering_d6_BLOIS_2014_OPT_qDTA8	PZA01038.1	PZA01038.1	128420026	Founder_prob	Founder_probs
-8.46727	4.00867	-2.11224	A654_inra	male_flowering_d6_BLOIS_2014_OPT_qDTA8	PZA01038.1	PZA01038.1	128420026	Founder_prob	Founder_probs
-4.7813	4.27783	-1.11769	FV2_inra	male_flowering_d6_BLOIS_2014_OPT_qDTA8	PZA01038.1	PZA01038.1	128420026	Founder_prob	Founder_probs
5.72858	5.87153	0.975653	C103_inra	male_flowering_d6_BLOIS_2014_OPT_qDTA8	PZA01038.1	PZA01038.1	128420026	Founder_prob	Founder_probs
-13.0404	5.56333	-2.344	EP1_inra	male_flowering_d6_BLOIS_2014_OPT_qDTA8	PZA01038.1	PZA01038.1	128420026	Founder_prob	Founder_probs
-15.0237	4.10448	-3.66031	D105_inra	male_flowering_d6_BLOIS_2014_OPT_qDTA8	PZA01038.1	PZA01038.1	128420026	Founder_prob	Founder_probs
-0.793566	4.8634	-0.163171	W117_inra	male_flowering_d6_BLOIS_2014_OPT_qDTA8	PZA01038.1	PZA01038.1	128420026	Founder_prob	Founder_probs
14.8299	6.59416	2.24895	B96	male_flowering_d6_BLOIS_2014_OPT_qDTA8	PZA01038.1	PZA01038.1	128420026	Founder_prob	Founder_probs
-15.2971	5.07297	-3.01542	DK63	male_flowering_d6_BLOIS_2014_OPT_qDTA8	PZA01038.1	PZA01038.1	128420026	Founder_prob	Founder_probs
10.1656	6.95808	1.46098	F492	male_flowering_d6_BLOIS_2014_OPT_qDTA8	PZA01038.1	PZA01038.1	128420026	Founder_prob	Founder_probs
-14.9297	5.878	-2.53992	ND245	male_flowering_d6_BLOIS_2014_OPT_qDTA8	PZA01038.1	PZA01038.1	128420026	Founder_prob	Founder_probs
21.2871	5.83878	3.64582	VA85	male_flowering_d6_BLOIS_2014_OPT_qDTA8	PZA01038.1	PZA01038.1	128420026	Founder_prob	Founder_probs
2.75892	5.36543	0.514203	B73_inra	male_flowering_d6_BLOIS_2014_OPT_qDTA3_2	AX-90834861	AX-90834820	160277722	Founder_prob	Haplotype_probs
-3.14227	6.41305	-0.489981	A632_usa	male_flowering_d6_BLOIS_2014_OPT_qDTA3_2	AX-90834861	AX-90834820	160277722	Founder_prob	Haplotype_probs
-11.4281	5.97681	-1.91207	CO255_inra	male_flowering_d6_BLOIS_2014_OPT_qDTA3_2	AX-90834861	AX-90834820	160277722	Founder_prob	Haplotype_probs
-20.1049	6.02394	-3.3375	FV252_inra	male_flowering_d6_BLOIS_2014_OPT_qDTA3_2	AX-90834861	AX-90834820	160277722	Founder_prob	Haplotype_probs
12.4595	4.34881	2.86504	OH43_inra	male_flowering_d6_BLOIS_2014_OPT_qDTA3_2	AX-90834861	AX-90834820	160277722	Founder_prob	Haplotype_probs
-6.87554	6.4026	-1.07387	A654_inra	male_flowering_d6_BLOIS_2014_OPT_qDTA3_2	AX-90834861	AX-90834820	160277722	Founder_prob	Haplotype_probs
-9.71704	4.90127	-1.98256	FV2_inra	male_flowering_d6_BLOIS_2014_OPT_qDTA3_2	AX-90834861	AX-90834820	160277722	Founder_prob	Haplotype_probs
8.10774	4.49003	1.80572	C103_inra	male_flowering_d6_BLOIS_2014_OPT_qDTA3_2	AX-90834861	AX-90834820	160277722	Founder_prob	Haplotype_probs
-18.3462	4.4436	-4.12867	EP1_inra	male_flowering_d6_BLOIS_2014_OPT_qDTA3_2	AX-90834861	AX-90834820	160277722	Founder_prob	Haplotype_probs
-2.74388	6.03989	-0.454293	D105_inra	male_flowering_d6_BLOIS_2014_OPT_qDTA3_2	AX-90834861	AX-90834820	160277722	Founder_prob	Haplotype_probs
-3.51206	6.46346	-0.543372	W117_inra	male_flowering_d6_BLOIS_2014_OPT_qDTA3_2	AX-90834861	AX-90834820	160277722	Founder_prob	Haplotype_probs
21.9527	3.88147	5.65577	B96	male_flowering_d6_BLOIS_2014_OPT_qDTA3_2	AX-90834861	AX-90834820	160277722	Founder_prob	Haplotype_probs
-2.16924	3.83052	-0.566304	DK63	male_flowering_d6_BLOIS_2014_OPT_qDTA3_2	AX-90834861	AX-90834820	160277722	Founder_prob	Haplotype_probs
2.45739	4.37501	0.561689	F492	male_flowering_d6_BLOIS_2014_OPT_qDTA3_2	AX-90834861	AX-90834820	160277722	Founder_prob	Haplotype_probs
-1.21925	5.14547	-0.236955	ND245	male_flowering_d6_BLOIS_2014_OPT_qDTA3_2	AX-90834861	AX-90834820	160277722	Founder_prob	Haplotype_probs
2.66647	4.94893	0.538797	VA85	male_flowering_d6_BLOIS_2014_OPT_qDTA3_2	AX-90834861	AX-90834820	160277722	Founder_prob	Haplotype_probs
20.4457	3.9967	5.11565	B73_inra	male_flowering_d6_BLOIS_2014_OPT_qDTA8	AX-91101099	PZA01038.1	128743539	Founder_prob	Haplotype_probs
3.46306	5.9967	0.577494	A632_usa	male_flowering_d6_BLOIS_2014_OPT_qDTA8	AX-91101099	PZA01038.1	128743539	Founder_prob	Haplotype_probs
-6.28934	3.79354	-1.65791	CO255_inra	male_flowering_d6_BLOIS_2014_OPT_qDTA8	AX-91101099	PZA01038.1	128743539	Founder_prob	Haplotype_probs
8.0834	4.60217	1.75643	FV252_inra	male_flowering_d6_BLOIS_2014_OPT_qDTA8	AX-91101099	PZA01038.1	128743539	Founder_prob	Haplotype_probs
13.9196	7.45171	1.86798	OH43_inra	male_flowering_d6_BLOIS_2014_OPT_qDTA8	AX-91101099	PZA01038.1	128743539	Founder_prob	Haplotype_probs
-8.46727	4.00867	-2.11224	A654_inra	male_flowering_d6_BLOIS_2014_OPT_qDTA8	AX-91101099	PZA01038.1	128743539	Founder_prob	Haplotype_probs
-4.7813	4.27783	-1.11769	FV2_inra	male_flowering_d6_BLOIS_2014_OPT_qDTA8	AX-91101099	PZA01038.1	128743539	Founder_prob	Haplotype_probs
5.72858	5.87153	0.975653	C103_inra	male_flowering_d6_BLOIS_2014_OPT_qDTA8	AX-91101099	PZA01038.1	128743539	Founder_prob	Haplotype_probs
-13.0404	5.56333	-2.344	EP1_inra	male_flowering_d6_BLOIS_2014_OPT_qDTA8	AX-91101099	PZA01038.1	128743539	Founder_prob	Haplotype_probs
-15.0237	4.10448	-3.66031	D105_inra	male_flowering_d6_BLOIS_2014_OPT_qDTA8	AX-91101099	PZA01038.1	128743539	Founder_prob	Haplotype_probs
-0.793566	4.8634	-0.163171	W117_inra	male_flowering_d6_BLOIS_2014_OPT_qDTA8	AX-91101099	PZA01038.1	128743539	Founder_prob	Haplotype_probs
14.8299	6.59416	2.24895	B96	male_flowering_d6_BLOIS_2014_OPT_qDTA8	AX-91101099	PZA01038.1	128743539	Founder_prob	Haplotype_probs
-15.2971	5.07297	-3.01542	DK63	male_flowering_d6_BLOIS_2014_OPT_qDTA8	AX-91101099	PZA01038.1	128743539	Founder_prob	Haplotype_probs
10.1656	6.95808	1.46098	F492	male_flowering_d6_BLOIS_2014_OPT_qDTA8	AX-91101099	PZA01038.1	128743539	Founder_prob	Haplotype_probs
-14.9297	5.878	-2.53992	ND245	male_flowering_d6_BLOIS_2014_OPT_qDTA8	AX-91101099	PZA01038.1	128743539	Founder_prob	Haplotype_probs
21.2871	5.83878	3.64582	VA85	male_flowering_d6_BLOIS_2014_OPT_qDTA8	AX-91101099	PZA01038.1	128743539	Founder_prob	Haplotype_probs
8.84407	5.16831	1.71121	B73_inra	male_flowering_d6_BLOIS_2017_OPT_qDTA8	AX-91106658	AX-91106569	149450033	Founder_prob	600K_SNP
12.254	5.70527	2.14783	A632_usa	male_flowering_d6_BLOIS_2017_OPT_qDTA8	AX-91106658	AX-91106569	149450033	Founder_prob	600K_SNP
-12.2508	5.48831	-2.23216	CO255_inra	male_flowering_d6_BLOIS_2017_OPT_qDTA8	AX-91106658	AX-91106569	149450033	Founder_prob	600K_SNP
-0.345592	5.74022	-0.0602053	FV252_inra	male_flowering_d6_BLOIS_2017_OPT_qDTA8	AX-91106658	AX-91106569	149450033	Founder_prob	600K_SNP
12.9531	6.36838	2.03397	OH43_inra	male_flowering_d6_BLOIS_2017_OPT_qDTA8	AX-91106658	AX-91106569	149450033	Founder_prob	600K_SNP
1.57635	5.89891	0.267227	A654_inra	male_flowering_d6_BLOIS_2017_OPT_qDTA8	AX-91106658	AX-91106569	149450033	Founder_prob	600K_SNP
-3.80702	5.84952	-0.650826	FV2_inra	male_flowering_d6_BLOIS_2017_OPT_qDTA8	AX-91106658	AX-91106569	149450033	Founder_prob	600K_SNP
15.6778	7.36124	2.12978	C103_inra	male_flowering_d6_BLOIS_2017_OPT_qDTA8	AX-91106658	AX-91106569	149450033	Founder_prob	600K_SNP
-19.4943	7.00241	-2.78394	EP1_inra	male_flowering_d6_BLOIS_2017_OPT_qDTA8	AX-91106658	AX-91106569	149450033	Founder_prob	600K_SNP
-13.6418	5.22097	-2.61288	D105_inra	male_flowering_d6_BLOIS_2017_OPT_qDTA8	AX-91106658	AX-91106569	149450033	Founder_prob	600K_SNP
-20.9017	6.80203	-3.07286	W117_inra	male_flowering_d6_BLOIS_2017_OPT_qDTA8	AX-91106658	AX-91106569	149450033	Founder_prob	600K_SNP
26.7506	11.0269	2.42593	B96	male_flowering_d6_BLOIS_2017_OPT_qDTA8	AX-91106658	AX-91106569	149450033	Founder_prob	600K_SNP
-6.7677	5.56688	-1.21571	DK63	male_flowering_d6_BLOIS_2017_OPT_qDTA8	AX-91106658	AX-91106569	149450033	Founder_prob	600K_SNP
9.33771	8.61205	1.08426	F492	male_flowering_d6_BLOIS_2017_OPT_qDTA8	AX-91106658	AX-91106569	149450033	Founder_prob	600K_SNP
-6.73172	9.49037	-0.709321	ND245	male_flowering_d6_BLOIS_2017_OPT_qDTA8	AX-91106658	AX-91106569	149450033	Founder_prob	600K_SNP
17.9063	6.29568	2.84421	VA85	male_flowering_d6_BLOIS_2017_OPT_qDTA8	AX-91106658	AX-91106569	149450033	Founder_prob	600K_SNP
5.72897	6.54559	0.875242	B73_inra	male_flowering_d6_BLOIS_2017_OPT_qDTA3_1	AX-90796752	AX-90796752	10269770	Founder_prob	Founder_probs
-211.941	79.916	-2.65204	A632_usa	male_flowering_d6_BLOIS_2017_OPT_qDTA3_1	AX-90796752	AX-90796752	10269770	Founder_prob	Founder_probs
-34.2978	7.31292	-4.69003	CO255_inra	male_flowering_d6_BLOIS_2017_OPT_qDTA3_1	AX-90796752	AX-90796752	10269770	Founder_prob	Founder_probs
-6.99922	9.93363	-0.704599	FV252_inra	male_flowering_d6_BLOIS_2017_OPT_qDTA3_1	AX-90796752	AX-90796752	10269770	Founder_prob	Founder_probs
-0.991266	5.65068	-0.175424	OH43_inra	male_flowering_d6_BLOIS_2017_OPT_qDTA3_1	AX-90796752	AX-90796752	10269770	Founder_prob	Founder_probs
2.3362	7.44113	0.313957	A654_inra	male_flowering_d6_BLOIS_2017_OPT_qDTA3_1	AX-90796752	AX-90796752	10269770	Founder_prob	Founder_probs
-7.12408	4.91084	-1.45068	FV2_inra	male_flowering_d6_BLOIS_2017_OPT_qDTA3_1	AX-90796752	AX-90796752	10269770	Founder_prob	Founder_probs
7.21302	6.13707	1.17532	C103_inra	male_flowering_d6_BLOIS_2017_OPT_qDTA3_1	AX-90796752	AX-90796752	10269770	Founder_prob	Founder_probs
3.57475	11.9045	0.300286	EP1_inra	male_flowering_d6_BLOIS_2017_OPT_qDTA3_1	AX-90796752	AX-90796752	10269770	Founder_prob	Founder_probs
-3.82827	6.72027	-0.56966	D105_inra	male_flowering_d6_BLOIS_2017_OPT_qDTA3_1	AX-90796752	AX-90796752	10269770	Founder_prob	Founder_probs
11.3369	12.2082	0.928625	W117_inra	male_flowering_d6_BLOIS_2017_OPT_qDTA3_1	AX-90796752	AX-90796752	10269770	Founder_prob	Founder_probs
17.7234	6.54481	2.708	B96	male_flowering_d6_BLOIS_2017_OPT_qDTA3_1	AX-90796752	AX-90796752	10269770	Founder_prob	Founder_probs
8.14206	4.50728	1.80643	DK63	male_flowering_d6_BLOIS_2017_OPT_qDTA3_1	AX-90796752	AX-90796752	10269770	Founder_prob	Founder_probs
7.14272	5.83498	1.22412	F492	male_flowering_d6_BLOIS_2017_OPT_qDTA3_1	AX-90796752	AX-90796752	10269770	Founder_prob	Founder_probs
12.6093	5.81847	2.16712	ND245	male_flowering_d6_BLOIS_2017_OPT_qDTA3_1	AX-90796752	AX-90796752	10269770	Founder_prob	Founder_probs
-13.7255	7.73293	-1.77494	VA85	male_flowering_d6_BLOIS_2017_OPT_qDTA3_1	AX-90796752	AX-90796752	10269770	Founder_prob	Founder_probs
5.23272	7.41251	0.705931	B73_inra	male_flowering_d6_BLOIS_2017_OPT_qDTA3_2	AX-90834914	AX-90834914	160426458	Founder_prob	Founder_probs
0.552525	8.75483	0.0631109	A632_usa	male_flowering_d6_BLOIS_2017_OPT_qDTA3_2	AX-90834914	AX-90834914	160426458	Founder_prob	Founder_probs
-25.7476	7.95565	-3.2364	CO255_inra	male_flowering_d6_BLOIS_2017_OPT_qDTA3_2	AX-90834914	AX-90834914	160426458	Founder_prob	Founder_probs
-21.2451	7.92736	-2.67997	FV252_inra	male_flowering_d6_BLOIS_2017_OPT_qDTA3_2	AX-90834914	AX-90834914	160426458	Founder_prob	Founder_probs
9.36193	5.47051	1.71134	OH43_inra	male_flowering_d6_BLOIS_2017_OPT_qDTA3_2	AX-90834914	AX-90834914	160426458	Founder_prob	Founder_probs
-2.07145	8.35682	-0.247876	A654_inra	male_flowering_d6_BLOIS_2017_OPT_qDTA3_2	AX-90834914	AX-90834914	160426458	Founder_prob	Founder_probs
-7.16979	6.09709	-1.17594	FV2_inra	male_flowering_d6_BLOIS_2017_OPT_qDTA3_2	AX-90834914	AX-90834914	160426458	Founder_prob	Founder_probs
-0.8334	5.78252	-0.144124	C103_inra	male_flowering_d6_BLOIS_2017_OPT_qDTA3_2	AX-90834914	AX-90834914	160426458	Founder_prob	Founder_probs
-24.0771	6.00169	-4.01171	EP1_inra	male_flowering_d6_BLOIS_2017_OPT_qDTA3_2	AX-90834914	AX-90834914	160426458	Founder_prob	Founder_probs
-7.45572	7.63095	-0.977037	D105_inra	male_flowering_d6_BLOIS_2017_OPT_qDTA3_2	AX-90834914	AX-90834914	160426458	Founder_prob	Founder_probs
5.91418	8.10126	0.730032	W117_inra	male_flowering_d6_BLOIS_2017_OPT_qDTA3_2	AX-90834914	AX-90834914	160426458	Founder_prob	Founder_probs
21.568	4.98819	4.32381	B96	male_flowering_d6_BLOIS_2017_OPT_qDTA3_2	AX-90834914	AX-90834914	160426458	Founder_prob	Founder_probs
5.4728	4.79363	1.14168	DK63	male_flowering_d6_BLOIS_2017_OPT_qDTA3_2	AX-90834914	AX-90834914	160426458	Founder_prob	Founder_probs
5.55169	5.84851	0.949249	F492	male_flowering_d6_BLOIS_2017_OPT_qDTA3_2	AX-90834914	AX-90834914	160426458	Founder_prob	Founder_probs
2.31119	6.67472	0.346261	ND245	male_flowering_d6_BLOIS_2017_OPT_qDTA3_2	AX-90834914	AX-90834914	160426458	Founder_prob	Founder_probs
0.320536	6.47562	0.0494988	VA85	male_flowering_d6_BLOIS_2017_OPT_qDTA3_2	AX-90834914	AX-90834914	160426458	Founder_prob	Founder_probs
8.84407	5.16831	1.71121	B73_inra	male_flowering_d6_BLOIS_2017_OPT_qDTA8	AX-91106569	AX-91106569	148965697	Founder_prob	Founder_probs
12.254	5.70527	2.14783	A632_usa	male_flowering_d6_BLOIS_2017_OPT_qDTA8	AX-91106569	AX-91106569	148965697	Founder_prob	Founder_probs
-12.2508	5.48831	-2.23216	CO255_inra	male_flowering_d6_BLOIS_2017_OPT_qDTA8	AX-91106569	AX-91106569	148965697	Founder_prob	Founder_probs
-0.345592	5.74022	-0.0602053	FV252_inra	male_flowering_d6_BLOIS_2017_OPT_qDTA8	AX-91106569	AX-91106569	148965697	Founder_prob	Founder_probs
12.9531	6.36838	2.03397	OH43_inra	male_flowering_d6_BLOIS_2017_OPT_qDTA8	AX-91106569	AX-91106569	148965697	Founder_prob	Founder_probs
1.57635	5.89891	0.267227	A654_inra	male_flowering_d6_BLOIS_2017_OPT_qDTA8	AX-91106569	AX-91106569	148965697	Founder_prob	Founder_probs
-3.80702	5.84952	-0.650826	FV2_inra	male_flowering_d6_BLOIS_2017_OPT_qDTA8	AX-91106569	AX-91106569	148965697	Founder_prob	Founder_probs
15.6778	7.36124	2.12978	C103_inra	male_flowering_d6_BLOIS_2017_OPT_qDTA8	AX-91106569	AX-91106569	148965697	Founder_prob	Founder_probs
-19.4943	7.00241	-2.78394	EP1_inra	male_flowering_d6_BLOIS_2017_OPT_qDTA8	AX-91106569	AX-91106569	148965697	Founder_prob	Founder_probs
-13.6418	5.22097	-2.61288	D105_inra	male_flowering_d6_BLOIS_2017_OPT_qDTA8	AX-91106569	AX-91106569	148965697	Founder_prob	Founder_probs
-20.9017	6.80203	-3.07286	W117_inra	male_flowering_d6_BLOIS_2017_OPT_qDTA8	AX-91106569	AX-91106569	148965697	Founder_prob	Founder_probs
26.7506	11.0269	2.42593	B96	male_flowering_d6_BLOIS_2017_OPT_qDTA8	AX-91106569	AX-91106569	148965697	Founder_prob	Founder_probs
-6.7677	5.56688	-1.21571	DK63	male_flowering_d6_BLOIS_2017_OPT_qDTA8	AX-91106569	AX-91106569	148965697	Founder_prob	Founder_probs
9.33771	8.61205	1.08426	F492	male_flowering_d6_BLOIS_2017_OPT_qDTA8	AX-91106569	AX-91106569	148965697	Founder_prob	Founder_probs
-6.73172	9.49037	-0.709321	ND245	male_flowering_d6_BLOIS_2017_OPT_qDTA8	AX-91106569	AX-91106569	148965697	Founder_prob	Founder_probs
17.9063	6.29568	2.84421	VA85	male_flowering_d6_BLOIS_2017_OPT_qDTA8	AX-91106569	AX-91106569	148965697	Founder_prob	Founder_probs
5.76324	6.3967	0.900971	B73_inra	male_flowering_d6_BLOIS_2017_OPT_qDTA3_1	AX-90796949	AX-91555688	11159770	Founder_prob	Haplotype_probs
-29.5957	6.97063	-4.24577	CO255_inra	male_flowering_d6_BLOIS_2017_OPT_qDTA3_1	AX-90796949	AX-91555688	11159770	Founder_prob	Haplotype_probs
-14.2568	8.14799	-1.74973	FV252_inra	male_flowering_d6_BLOIS_2017_OPT_qDTA3_1	AX-90796949	AX-91555688	11159770	Founder_prob	Haplotype_probs
3.59116	6.14747	0.584169	OH43_inra	male_flowering_d6_BLOIS_2017_OPT_qDTA3_1	AX-90796949	AX-91555688	11159770	Founder_prob	Haplotype_probs
-0.68229	6.97832	-0.0977728	A654_inra	male_flowering_d6_BLOIS_2017_OPT_qDTA3_1	AX-90796949	AX-91555688	11159770	Founder_prob	Haplotype_probs
-6.04154	5.42913	-1.1128	FV2_inra	male_flowering_d6_BLOIS_2017_OPT_qDTA3_1	AX-90796949	AX-91555688	11159770	Founder_prob	Haplotype_probs
6.69078	6.02255	1.11095	C103_inra	male_flowering_d6_BLOIS_2017_OPT_qDTA3_1	AX-90796949	AX-91555688	11159770	Founder_prob	Haplotype_probs
-10.8684	21.0256	-0.516911	EP1_inra	male_flowering_d6_BLOIS_2017_OPT_qDTA3_1	AX-90796949	AX-91555688	11159770	Founder_prob	Haplotype_probs
-5.53744	6.72508	-0.8234	D105_inra	male_flowering_d6_BLOIS_2017_OPT_qDTA3_1	AX-90796949	AX-91555688	11159770	Founder_prob	Haplotype_probs
10.6266	11.4261	0.930024	W117_inra	male_flowering_d6_BLOIS_2017_OPT_qDTA3_1	AX-90796949	AX-91555688	11159770	Founder_prob	Haplotype_probs
16.4848	6.41829	2.56841	B96	male_flowering_d6_BLOIS_2017_OPT_qDTA3_1	AX-90796949	AX-91555688	11159770	Founder_prob	Haplotype_probs
8.74325	4.46398	1.95862	DK63	male_flowering_d6_BLOIS_2017_OPT_qDTA3_1	AX-90796949	AX-91555688	11159770	Founder_prob	Haplotype_probs
6.35027	5.43149	1.16916	F492	male_flowering_d6_BLOIS_2017_OPT_qDTA3_1	AX-90796949	AX-91555688	11159770	Founder_prob	Haplotype_probs
8.52866	5.85255	1.45726	ND245	male_flowering_d6_BLOIS_2017_OPT_qDTA3_1	AX-90796949	AX-91555688	11159770	Founder_prob	Haplotype_probs
-11.5168	7.23359	-1.59213	VA85	male_flowering_d6_BLOIS_2017_OPT_qDTA3_1	AX-90796949	AX-91555688	11159770	Founder_prob	Haplotype_probs
5.23272	7.41251	0.705931	B73_inra	male_flowering_d6_BLOIS_2017_OPT_qDTA3_2	AX-90834914	AX-90834914	160426458	Founder_prob	Haplotype_probs
0.552525	8.75483	0.0631109	A632_usa	male_flowering_d6_BLOIS_2017_OPT_qDTA3_2	AX-90834914	AX-90834914	160426458	Founder_prob	Haplotype_probs
-25.7476	7.95565	-3.2364	CO255_inra	male_flowering_d6_BLOIS_2017_OPT_qDTA3_2	AX-90834914	AX-90834914	160426458	Founder_prob	Haplotype_probs
-21.2451	7.92736	-2.67997	FV252_inra	male_flowering_d6_BLOIS_2017_OPT_qDTA3_2	AX-90834914	AX-90834914	160426458	Founder_prob	Haplotype_probs
9.36193	5.47051	1.71134	OH43_inra	male_flowering_d6_BLOIS_2017_OPT_qDTA3_2	AX-90834914	AX-90834914	160426458	Founder_prob	Haplotype_probs
-2.07145	8.35682	-0.247876	A654_inra	male_flowering_d6_BLOIS_2017_OPT_qDTA3_2	AX-90834914	AX-90834914	160426458	Founder_prob	Haplotype_probs
-7.16979	6.09709	-1.17594	FV2_inra	male_flowering_d6_BLOIS_2017_OPT_qDTA3_2	AX-90834914	AX-90834914	160426458	Founder_prob	Haplotype_probs
-0.8334	5.78252	-0.144124	C103_inra	male_flowering_d6_BLOIS_2017_OPT_qDTA3_2	AX-90834914	AX-90834914	160426458	Founder_prob	Haplotype_probs
-24.0771	6.00169	-4.01171	EP1_inra	male_flowering_d6_BLOIS_2017_OPT_qDTA3_2	AX-90834914	AX-90834914	160426458	Founder_prob	Haplotype_probs
-7.45572	7.63095	-0.977037	D105_inra	male_flowering_d6_BLOIS_2017_OPT_qDTA3_2	AX-90834914	AX-90834914	160426458	Founder_prob	Haplotype_probs
5.91418	8.10126	0.730032	W117_inra	male_flowering_d6_BLOIS_2017_OPT_qDTA3_2	AX-90834914	AX-90834914	160426458	Founder_prob	Haplotype_probs
21.568	4.98819	4.32381	B96	male_flowering_d6_BLOIS_2017_OPT_qDTA3_2	AX-90834914	AX-90834914	160426458	Founder_prob	Haplotype_probs
5.4728	4.79363	1.14168	DK63	male_flowering_d6_BLOIS_2017_OPT_qDTA3_2	AX-90834914	AX-90834914	160426458	Founder_prob	Haplotype_probs
5.55169	5.84851	0.949249	F492	male_flowering_d6_BLOIS_2017_OPT_qDTA3_2	AX-90834914	AX-90834914	160426458	Founder_prob	Haplotype_probs
2.31119	6.67472	0.346261	ND245	male_flowering_d6_BLOIS_2017_OPT_qDTA3_2	AX-90834914	AX-90834914	160426458	Founder_prob	Haplotype_probs
0.320536	6.47562	0.0494988	VA85	male_flowering_d6_BLOIS_2017_OPT_qDTA3_2	AX-90834914	AX-90834914	160426458	Founder_prob	Haplotype_probs
8.8163	5.18268	1.70111	B73_inra	male_flowering_d6_BLOIS_2017_OPT_qDTA8	AX-91106190	AX-91771730	147721206	Founder_prob	Haplotype_probs
12.1381	5.72092	2.1217	A632_usa	male_flowering_d6_BLOIS_2017_OPT_qDTA8	AX-91106190	AX-91771730	147721206	Founder_prob	Haplotype_probs
-13.5963	5.39983	-2.5179	CO255_inra	male_flowering_d6_BLOIS_2017_OPT_qDTA8	AX-91106190	AX-91771730	147721206	Founder_prob	Haplotype_probs
5.44235	6.16367	0.882973	FV252_inra	male_flowering_d6_BLOIS_2017_OPT_qDTA8	AX-91106190	AX-91771730	147721206	Founder_prob	Haplotype_probs
12.9913	6.39053	2.03289	OH43_inra	male_flowering_d6_BLOIS_2017_OPT_qDTA8	AX-91106190	AX-91771730	147721206	Founder_prob	Haplotype_probs
0.552877	5.78116	0.0956343	A654_inra	male_flowering_d6_BLOIS_2017_OPT_qDTA8	AX-91106190	AX-91771730	147721206	Founder_prob	Haplotype_probs
-5.21522	6.21373	-0.839305	FV2_inra	male_flowering_d6_BLOIS_2017_OPT_qDTA8	AX-91106190	AX-91771730	147721206	Founder_prob	Haplotype_probs
11.1765	7.12566	1.56849	C103_inra	male_flowering_d6_BLOIS_2017_OPT_qDTA8	AX-91106190	AX-91771730	147721206	Founder_prob	Haplotype_probs
-19.44	7.02214	-2.76839	EP1_inra	male_flowering_d6_BLOIS_2017_OPT_qDTA8	AX-91106190	AX-91771730	147721206	Founder_prob	Haplotype_probs
-13.7087	5.23535	-2.61848	D105_inra	male_flowering_d6_BLOIS_2017_OPT_qDTA8	AX-91106190	AX-91771730	147721206	Founder_prob	Haplotype_probs
-19.3025	6.71535	-2.87439	W117_inra	male_flowering_d6_BLOIS_2017_OPT_qDTA8	AX-91106190	AX-91771730	147721206	Founder_prob	Haplotype_probs
26.4109	11.0582	2.38836	B96	male_flowering_d6_BLOIS_2017_OPT_qDTA8	AX-91106190	AX-91771730	147721206	Founder_prob	Haplotype_probs
-6.11906	5.36107	-1.14139	DK63	male_flowering_d6_BLOIS_2017_OPT_qDTA8	AX-91106190	AX-91771730	147721206	Founder_prob	Haplotype_probs
9.08148	8.63556	1.05164	F492	male_flowering_d6_BLOIS_2017_OPT_qDTA8	AX-91106190	AX-91771730	147721206	Founder_prob	Haplotype_probs
-6.06356	10.1967	-0.59466	ND245	male_flowering_d6_BLOIS_2017_OPT_qDTA8	AX-91106190	AX-91771730	147721206	Founder_prob	Haplotype_probs
17.7632	6.31003	2.81507	VA85	male_flowering_d6_BLOIS_2017_OPT_qDTA8	AX-91106190	AX-91771730	147721206	Founder_prob	Haplotype_probs
9.30679	6.3364	1.46878	B73_inra	male_flowering_d6_GRANEROS_2015_OPT_qDTA3_2	AX-90835099	AX-90835093	161296968	Founder_prob	600K_SNP
-3.82335	7.91444	-0.483085	A632_usa	male_flowering_d6_GRANEROS_2015_OPT_qDTA3_2	AX-90835099	AX-90835093	161296968	Founder_prob	600K_SNP
-10.4623	6.16495	-1.69706	CO255_inra	male_flowering_d6_GRANEROS_2015_OPT_qDTA3_2	AX-90835099	AX-90835093	161296968	Founder_prob	600K_SNP
-18.3247	6.85768	-2.67214	FV252_inra	male_flowering_d6_GRANEROS_2015_OPT_qDTA3_2	AX-90835099	AX-90835093	161296968	Founder_prob	600K_SNP
13.2848	4.87725	2.72383	OH43_inra	male_flowering_d6_GRANEROS_2015_OPT_qDTA3_2	AX-90835099	AX-90835093	161296968	Founder_prob	600K_SNP
-8.79489	7.26602	-1.21041	A654_inra	male_flowering_d6_GRANEROS_2015_OPT_qDTA3_2	AX-90835099	AX-90835093	161296968	Founder_prob	600K_SNP
-8.62244	5.70499	-1.51139	FV2_inra	male_flowering_d6_GRANEROS_2015_OPT_qDTA3_2	AX-90835099	AX-90835093	161296968	Founder_prob	600K_SNP
-0.870002	4.99776	-0.174078	C103_inra	male_flowering_d6_GRANEROS_2015_OPT_qDTA3_2	AX-90835099	AX-90835093	161296968	Founder_prob	600K_SNP
-22.9446	5.73504	-4.00077	EP1_inra	male_flowering_d6_GRANEROS_2015_OPT_qDTA3_2	AX-90835099	AX-90835093	161296968	Founder_prob	600K_SNP
-9.50878	6.46523	-1.47076	D105_inra	male_flowering_d6_GRANEROS_2015_OPT_qDTA3_2	AX-90835099	AX-90835093	161296968	Founder_prob	600K_SNP
-1.76595	8.24287	-0.214239	W117_inra	male_flowering_d6_GRANEROS_2015_OPT_qDTA3_2	AX-90835099	AX-90835093	161296968	Founder_prob	600K_SNP
24.3696	4.41948	5.51413	B96	male_flowering_d6_GRANEROS_2015_OPT_qDTA3_2	AX-90835099	AX-90835093	161296968	Founder_prob	600K_SNP
1.72165	4.2808	0.40218	DK63	male_flowering_d6_GRANEROS_2015_OPT_qDTA3_2	AX-90835099	AX-90835093	161296968	Founder_prob	600K_SNP
0.574687	4.99776	0.114989	F492	male_flowering_d6_GRANEROS_2015_OPT_qDTA3_2	AX-90835099	AX-90835093	161296968	Founder_prob	600K_SNP
2.47437	5.68529	0.435224	ND245	male_flowering_d6_GRANEROS_2015_OPT_qDTA3_2	AX-90835099	AX-90835093	161296968	Founder_prob	600K_SNP
-1.65722	6.02453	-0.275078	VA85	male_flowering_d6_GRANEROS_2015_OPT_qDTA3_2	AX-90835099	AX-90835093	161296968	Founder_prob	600K_SNP
1.05806	4.72605	0.223879	B73_inra	male_flowering_d6_GRANEROS_2015_OPT_qDTA7	AX-91026083	AX-91026039	15643214	Founder_prob	600K_SNP
11.7691	11.0179	1.06818	A632_usa	male_flowering_d6_GRANEROS_2015_OPT_qDTA7	AX-91026083	AX-91026039	15643214	Founder_prob	600K_SNP
-6.82521	5.87318	-1.1621	CO255_inra	male_flowering_d6_GRANEROS_2015_OPT_qDTA7	AX-91026083	AX-91026039	15643214	Founder_prob	600K_SNP
8.85726	6.06811	1.45964	FV252_inra	male_flowering_d6_GRANEROS_2015_OPT_qDTA7	AX-91026083	AX-91026039	15643214	Founder_prob	600K_SNP
2.12076	4.14722	0.511369	OH43_inra	male_flowering_d6_GRANEROS_2015_OPT_qDTA7	AX-91026083	AX-91026039	15643214	Founder_prob	600K_SNP
4.21099	5.8453	0.720407	A654_inra	male_flowering_d6_GRANEROS_2015_OPT_qDTA7	AX-91026083	AX-91026039	15643214	Founder_prob	600K_SNP
11.0552	5.57399	1.98335	FV2_inra	male_flowering_d6_GRANEROS_2015_OPT_qDTA7	AX-91026083	AX-91026039	15643214	Founder_prob	600K_SNP
2.85363	5.56396	0.512878	C103_inra	male_flowering_d6_GRANEROS_2015_OPT_qDTA7	AX-91026083	AX-91026039	15643214	Founder_prob	600K_SNP
16.6136	7.91266	2.09962	EP1_inra	male_flowering_d6_GRANEROS_2015_OPT_qDTA7	AX-91026083	AX-91026039	15643214	Founder_prob	600K_SNP
-4.82211	6.01643	-0.801491	D105_inra	male_flowering_d6_GRANEROS_2015_OPT_qDTA7	AX-91026083	AX-91026039	15643214	Founder_prob	600K_SNP
-28.2201	5.24252	-5.38293	W117_inra	male_flowering_d6_GRANEROS_2015_OPT_qDTA7	AX-91026083	AX-91026039	15643214	Founder_prob	600K_SNP
6.03941	4.64423	1.30041	B96	male_flowering_d6_GRANEROS_2015_OPT_qDTA7	AX-91026083	AX-91026039	15643214	Founder_prob	600K_SNP
-4.12054	5.20792	-0.791207	DK63	male_flowering_d6_GRANEROS_2015_OPT_qDTA7	AX-91026083	AX-91026039	15643214	Founder_prob	600K_SNP
-5.94093	6.73155	-0.88255	F492	male_flowering_d6_GRANEROS_2015_OPT_qDTA7	AX-91026083	AX-91026039	15643214	Founder_prob	600K_SNP
2.14985	5.95088	0.361265	ND245	male_flowering_d6_GRANEROS_2015_OPT_qDTA7	AX-91026083	AX-91026039	15643214	Founder_prob	600K_SNP
-2.86694	5.35325	-0.535552	VA85	male_flowering_d6_GRANEROS_2015_OPT_qDTA7	AX-91026083	AX-91026039	15643214	Founder_prob	600K_SNP
13.1196	3.94825	3.32289	B73_inra	male_flowering_d6_GRANEROS_2015_OPT_qDTA8	AX-91103301	AX-91103124	137170932	Founder_prob	600K_SNP
12.6629	7.18271	1.76297	A632_usa	male_flowering_d6_GRANEROS_2015_OPT_qDTA8	AX-91103301	AX-91103124	137170932	Founder_prob	600K_SNP
-7.47772	4.28088	-1.74677	CO255_inra	male_flowering_d6_GRANEROS_2015_OPT_qDTA8	AX-91103301	AX-91103124	137170932	Founder_prob	600K_SNP
7.97127	5.69208	1.40041	FV252_inra	male_flowering_d6_GRANEROS_2015_OPT_qDTA8	AX-91103301	AX-91103124	137170932	Founder_prob	600K_SNP
-4.33482	6.24761	-0.693837	A654_inra	male_flowering_d6_GRANEROS_2015_OPT_qDTA8	AX-91103301	AX-91103124	137170932	Founder_prob	600K_SNP
-2.34948	5.41623	-0.433786	FV2_inra	male_flowering_d6_GRANEROS_2015_OPT_qDTA8	AX-91103301	AX-91103124	137170932	Founder_prob	600K_SNP
10.1795	5.5363	1.83869	C103_inra	male_flowering_d6_GRANEROS_2015_OPT_qDTA8	AX-91103301	AX-91103124	137170932	Founder_prob	600K_SNP
-21.9709	5.95433	-3.6899	EP1_inra	male_flowering_d6_GRANEROS_2015_OPT_qDTA8	AX-91103301	AX-91103124	137170932	Founder_prob	600K_SNP
-11.9411	4.70526	-2.53782	D105_inra	male_flowering_d6_GRANEROS_2015_OPT_qDTA8	AX-91103301	AX-91103124	137170932	Founder_prob	600K_SNP
-2.55216	6.28554	-0.406036	W117_inra	male_flowering_d6_GRANEROS_2015_OPT_qDTA8	AX-91103301	AX-91103124	137170932	Founder_prob	600K_SNP
24.8115	10.4536	2.37348	B96	male_flowering_d6_GRANEROS_2015_OPT_qDTA8	AX-91103301	AX-91103124	137170932	Founder_prob	600K_SNP
-9.31705	5.82361	-1.59988	DK63	male_flowering_d6_GRANEROS_2015_OPT_qDTA8	AX-91103301	AX-91103124	137170932	Founder_prob	600K_SNP
7.51865	7.79915	0.964035	F492	male_flowering_d6_GRANEROS_2015_OPT_qDTA8	AX-91103301	AX-91103124	137170932	Founder_prob	600K_SNP
-18.3165	7.18875	-2.54794	ND245	male_flowering_d6_GRANEROS_2015_OPT_qDTA8	AX-91103301	AX-91103124	137170932	Founder_prob	600K_SNP
19.5595	6.36986	3.07063	VA85	male_flowering_d6_GRANEROS_2015_OPT_qDTA8	AX-91103301	AX-91103124	137170932	Founder_prob	600K_SNP
9.30679	6.3364	1.46878	B73_inra	male_flowering_d6_GRANEROS_2015_OPT_qDTA3_2	AX-90835093	AX-90835093	161293416	Founder_prob	Founder_probs
-3.82335	7.91444	-0.483085	A632_usa	male_flowering_d6_GRANEROS_2015_OPT_qDTA3_2	AX-90835093	AX-90835093	161293416	Founder_prob	Founder_probs
-10.4623	6.16495	-1.69706	CO255_inra	male_flowering_d6_GRANEROS_2015_OPT_qDTA3_2	AX-90835093	AX-90835093	161293416	Founder_prob	Founder_probs
-18.3247	6.85768	-2.67214	FV252_inra	male_flowering_d6_GRANEROS_2015_OPT_qDTA3_2	AX-90835093	AX-90835093	161293416	Founder_prob	Founder_probs
13.2848	4.87725	2.72383	OH43_inra	male_flowering_d6_GRANEROS_2015_OPT_qDTA3_2	AX-90835093	AX-90835093	161293416	Founder_prob	Founder_probs
-8.79489	7.26602	-1.21041	A654_inra	male_flowering_d6_GRANEROS_2015_OPT_qDTA3_2	AX-90835093	AX-90835093	161293416	Founder_prob	Founder_probs
-8.62244	5.70499	-1.51139	FV2_inra	male_flowering_d6_GRANEROS_2015_OPT_qDTA3_2	AX-90835093	AX-90835093	161293416	Founder_prob	Founder_probs
-0.870002	4.99776	-0.174078	C103_inra	male_flowering_d6_GRANEROS_2015_OPT_qDTA3_2	AX-90835093	AX-90835093	161293416	Founder_prob	Founder_probs
-22.9446	5.73504	-4.00077	EP1_inra	male_flowering_d6_GRANEROS_2015_OPT_qDTA3_2	AX-90835093	AX-90835093	161293416	Founder_prob	Founder_probs
-9.50878	6.46523	-1.47076	D105_inra	male_flowering_d6_GRANEROS_2015_OPT_qDTA3_2	AX-90835093	AX-90835093	161293416	Founder_prob	Founder_probs
-1.76595	8.24287	-0.214239	W117_inra	male_flowering_d6_GRANEROS_2015_OPT_qDTA3_2	AX-90835093	AX-90835093	161293416	Founder_prob	Founder_probs
24.3696	4.41948	5.51413	B96	male_flowering_d6_GRANEROS_2015_OPT_qDTA3_2	AX-90835093	AX-90835093	161293416	Founder_prob	Founder_probs
1.72165	4.2808	0.40218	DK63	male_flowering_d6_GRANEROS_2015_OPT_qDTA3_2	AX-90835093	AX-90835093	161293416	Founder_prob	Founder_probs
0.574687	4.99776	0.114989	F492	male_flowering_d6_GRANEROS_2015_OPT_qDTA3_2	AX-90835093	AX-90835093	161293416	Founder_prob	Founder_probs
2.47437	5.68529	0.435224	ND245	male_flowering_d6_GRANEROS_2015_OPT_qDTA3_2	AX-90835093	AX-90835093	161293416	Founder_prob	Founder_probs
-1.65722	6.02453	-0.275078	VA85	male_flowering_d6_GRANEROS_2015_OPT_qDTA3_2	AX-90835093	AX-90835093	161293416	Founder_prob	Founder_probs
1.50541	4.38711	0.343144	B73_inra	male_flowering_d6_GRANEROS_2015_OPT_qDTA7	AX-91715233	AX-91715233	14405491	Founder_prob	Founder_probs
23.4446	11.1614	2.10051	A632_usa	male_flowering_d6_GRANEROS_2015_OPT_qDTA7	AX-91715233	AX-91715233	14405491	Founder_prob	Founder_probs
-5.66611	5.74493	-0.98628	CO255_inra	male_flowering_d6_GRANEROS_2015_OPT_qDTA7	AX-91715233	AX-91715233	14405491	Founder_prob	Founder_probs
12.2692	6.25993	1.95995	FV252_inra	male_flowering_d6_GRANEROS_2015_OPT_qDTA7	AX-91715233	AX-91715233	14405491	Founder_prob	Founder_probs
0.901673	4.37128	0.206272	OH43_inra	male_flowering_d6_GRANEROS_2015_OPT_qDTA7	AX-91715233	AX-91715233	14405491	Founder_prob	Founder_probs
3.86144	5.359	0.720551	A654_inra	male_flowering_d6_GRANEROS_2015_OPT_qDTA7	AX-91715233	AX-91715233	14405491	Founder_prob	Founder_probs
9.58101	5.47203	1.7509	FV2_inra	male_flowering_d6_GRANEROS_2015_OPT_qDTA7	AX-91715233	AX-91715233	14405491	Founder_prob	Founder_probs
3.01687	5.51574	0.546956	C103_inra	male_flowering_d6_GRANEROS_2015_OPT_qDTA7	AX-91715233	AX-91715233	14405491	Founder_prob	Founder_probs
15.3449	7.88042	1.94722	EP1_inra	male_flowering_d6_GRANEROS_2015_OPT_qDTA7	AX-91715233	AX-91715233	14405491	Founder_prob	Founder_probs
-5.6832	5.83613	-0.973796	D105_inra	male_flowering_d6_GRANEROS_2015_OPT_qDTA7	AX-91715233	AX-91715233	14405491	Founder_prob	Founder_probs
-26.6155	5.081	-5.23825	W117_inra	male_flowering_d6_GRANEROS_2015_OPT_qDTA7	AX-91715233	AX-91715233	14405491	Founder_prob	Founder_probs
6.1654	4.61026	1.33732	B96	male_flowering_d6_GRANEROS_2015_OPT_qDTA7	AX-91715233	AX-91715233	14405491	Founder_prob	Founder_probs
-5.01248	5.27864	-0.949577	DK63	male_flowering_d6_GRANEROS_2015_OPT_qDTA7	AX-91715233	AX-91715233	14405491	Founder_prob	Founder_probs
-12.5433	7.32275	-1.71292	F492	male_flowering_d6_GRANEROS_2015_OPT_qDTA7	AX-91715233	AX-91715233	14405491	Founder_prob	Founder_probs
7.62191	5.68778	1.34005	ND245	male_flowering_d6_GRANEROS_2015_OPT_qDTA7	AX-91715233	AX-91715233	14405491	Founder_prob	Founder_probs
-5.44878	5.15715	-1.05655	VA85	male_flowering_d6_GRANEROS_2015_OPT_qDTA7	AX-91715233	AX-91715233	14405491	Founder_prob	Founder_probs
21.8624	5.03203	4.34464	B73_inra	male_flowering_d6_GRANEROS_2015_OPT_qDTA8	AX-91102858	AX-91102858	135530058	Founder_prob	Founder_probs
12.0896	7.08071	1.7074	A632_usa	male_flowering_d6_GRANEROS_2015_OPT_qDTA8	AX-91102858	AX-91102858	135530058	Founder_prob	Founder_probs
-7.00829	4.19796	-1.66945	CO255_inra	male_flowering_d6_GRANEROS_2015_OPT_qDTA8	AX-91102858	AX-91102858	135530058	Founder_prob	Founder_probs
11.2305	5.88738	1.90755	FV252_inra	male_flowering_d6_GRANEROS_2015_OPT_qDTA8	AX-91102858	AX-91102858	135530058	Founder_prob	Founder_probs
-9.60558	7.82516	-1.22753	A654_inra	male_flowering_d6_GRANEROS_2015_OPT_qDTA8	AX-91102858	AX-91102858	135530058	Founder_prob	Founder_probs
-2.88454	5.32777	-0.541416	FV2_inra	male_flowering_d6_GRANEROS_2015_OPT_qDTA8	AX-91102858	AX-91102858	135530058	Founder_prob	Founder_probs
8.55125	5.92031	1.44439	C103_inra	male_flowering_d6_GRANEROS_2015_OPT_qDTA8	AX-91102858	AX-91102858	135530058	Founder_prob	Founder_probs
-20.66	5.72657	-3.60775	EP1_inra	male_flowering_d6_GRANEROS_2015_OPT_qDTA8	AX-91102858	AX-91102858	135530058	Founder_prob	Founder_probs
-11.9787	4.55694	-2.62867	D105_inra	male_flowering_d6_GRANEROS_2015_OPT_qDTA8	AX-91102858	AX-91102858	135530058	Founder_prob	Founder_probs
-2.29748	6.15573	-0.373226	W117_inra	male_flowering_d6_GRANEROS_2015_OPT_qDTA8	AX-91102858	AX-91102858	135530058	Founder_prob	Founder_probs
21.4202	8.35056	2.56512	B96	male_flowering_d6_GRANEROS_2015_OPT_qDTA8	AX-91102858	AX-91102858	135530058	Founder_prob	Founder_probs
-7.87598	5.67913	-1.38683	DK63	male_flowering_d6_GRANEROS_2015_OPT_qDTA8	AX-91102858	AX-91102858	135530058	Founder_prob	Founder_probs
8.38824	7.76429	1.08036	F492	male_flowering_d6_GRANEROS_2015_OPT_qDTA8	AX-91102858	AX-91102858	135530058	Founder_prob	Founder_probs
-17.9927	7.07423	-2.54342	ND245	male_flowering_d6_GRANEROS_2015_OPT_qDTA8	AX-91102858	AX-91102858	135530058	Founder_prob	Founder_probs
19.2111	5.89504	3.25886	VA85	male_flowering_d6_GRANEROS_2015_OPT_qDTA8	AX-91102858	AX-91102858	135530058	Founder_prob	Founder_probs
8.4964	6.52912	1.30131	B73_inra	male_flowering_d6_GRANEROS_2015_OPT_qDTA3_2	AX-90834914	AX-90834914	160426458	Founder_prob	Haplotype_probs
-0.793402	7.56737	-0.104845	A632_usa	male_flowering_d6_GRANEROS_2015_OPT_qDTA3_2	AX-90834914	AX-90834914	160426458	Founder_prob	Haplotype_probs
-13.2285	6.57792	-2.01105	CO255_inra	male_flowering_d6_GRANEROS_2015_OPT_qDTA3_2	AX-90834914	AX-90834914	160426458	Founder_prob	Haplotype_probs
-18.8269	6.87568	-2.73818	FV252_inra	male_flowering_d6_GRANEROS_2015_OPT_qDTA3_2	AX-90834914	AX-90834914	160426458	Founder_prob	Haplotype_probs
12.0712	4.70506	2.56557	OH43_inra	male_flowering_d6_GRANEROS_2015_OPT_qDTA3_2	AX-90834914	AX-90834914	160426458	Founder_prob	Haplotype_probs
-7.72715	7.00446	-1.10318	A654_inra	male_flowering_d6_GRANEROS_2015_OPT_qDTA3_2	AX-90834914	AX-90834914	160426458	Founder_prob	Haplotype_probs
-8.45568	5.71272	-1.48015	FV2_inra	male_flowering_d6_GRANEROS_2015_OPT_qDTA3_2	AX-90834914	AX-90834914	160426458	Founder_prob	Haplotype_probs
0.125191	5.23351	0.023921	C103_inra	male_flowering_d6_GRANEROS_2015_OPT_qDTA3_2	AX-90834914	AX-90834914	160426458	Founder_prob	Haplotype_probs
-23.114	5.74615	-4.02253	EP1_inra	male_flowering_d6_GRANEROS_2015_OPT_qDTA3_2	AX-90834914	AX-90834914	160426458	Founder_prob	Haplotype_probs
-7.7011	6.66025	-1.15628	D105_inra	male_flowering_d6_GRANEROS_2015_OPT_qDTA3_2	AX-90834914	AX-90834914	160426458	Founder_prob	Haplotype_probs
0.422533	7.89678	0.0535071	W117_inra	male_flowering_d6_GRANEROS_2015_OPT_qDTA3_2	AX-90834914	AX-90834914	160426458	Founder_prob	Haplotype_probs
25.2571	4.52534	5.58126	B96	male_flowering_d6_GRANEROS_2015_OPT_qDTA3_2	AX-90834914	AX-90834914	160426458	Founder_prob	Haplotype_probs
1.92872	4.29302	0.44927	DK63	male_flowering_d6_GRANEROS_2015_OPT_qDTA3_2	AX-90834914	AX-90834914	160426458	Founder_prob	Haplotype_probs
0.67592	4.99081	0.135433	F492	male_flowering_d6_GRANEROS_2015_OPT_qDTA3_2	AX-90834914	AX-90834914	160426458	Founder_prob	Haplotype_probs
1.45531	5.86406	0.248174	ND245	male_flowering_d6_GRANEROS_2015_OPT_qDTA3_2	AX-90834914	AX-90834914	160426458	Founder_prob	Haplotype_probs
-4.28795	5.64099	-0.760142	VA85	male_flowering_d6_GRANEROS_2015_OPT_qDTA3_2	AX-90834914	AX-90834914	160426458	Founder_prob	Haplotype_probs
15.1837	4.89709	3.10056	B73_inra	male_flowering_d6_GRANEROS_2015_OPT_qDTA8	AX-91102778	AX-91102704	135145003	Founder_prob	Haplotype_probs
9.94683	8.19869	1.21322	A632_usa	male_flowering_d6_GRANEROS_2015_OPT_qDTA8	AX-91102778	AX-91102704	135145003	Founder_prob	Haplotype_probs
-8.21404	4.3782	-1.87612	CO255_inra	male_flowering_d6_GRANEROS_2015_OPT_qDTA8	AX-91102778	AX-91102704	135145003	Founder_prob	Haplotype_probs
10.8761	5.86257	1.85518	FV252_inra	male_flowering_d6_GRANEROS_2015_OPT_qDTA8	AX-91102778	AX-91102704	135145003	Founder_prob	Haplotype_probs
7.6773	9.65998	0.794754	OH43_inra	male_flowering_d6_GRANEROS_2015_OPT_qDTA8	AX-91102778	AX-91102704	135145003	Founder_prob	Haplotype_probs
-7.85455	6.08092	-1.29167	A654_inra	male_flowering_d6_GRANEROS_2015_OPT_qDTA8	AX-91102778	AX-91102704	135145003	Founder_prob	Haplotype_probs
-0.195937	5.0986	-0.0384295	FV2_inra	male_flowering_d6_GRANEROS_2015_OPT_qDTA8	AX-91102778	AX-91102704	135145003	Founder_prob	Haplotype_probs
6.25725	6.238	1.00309	C103_inra	male_flowering_d6_GRANEROS_2015_OPT_qDTA8	AX-91102778	AX-91102704	135145003	Founder_prob	Haplotype_probs
-18.7772	5.94112	-3.16054	EP1_inra	male_flowering_d6_GRANEROS_2015_OPT_qDTA8	AX-91102778	AX-91102704	135145003	Founder_prob	Haplotype_probs
-7.88155	4.67231	-1.68686	D105_inra	male_flowering_d6_GRANEROS_2015_OPT_qDTA8	AX-91102778	AX-91102704	135145003	Founder_prob	Haplotype_probs
-5.21025	6.06395	-0.859216	W117_inra	male_flowering_d6_GRANEROS_2015_OPT_qDTA8	AX-91102778	AX-91102704	135145003	Founder_prob	Haplotype_probs
20.5008	8.5228	2.40541	B96	male_flowering_d6_GRANEROS_2015_OPT_qDTA8	AX-91102778	AX-91102704	135145003	Founder_prob	Haplotype_probs
-8.93109	5.76388	-1.54949	DK63	male_flowering_d6_GRANEROS_2015_OPT_qDTA8	AX-91102778	AX-91102704	135145003	Founder_prob	Haplotype_probs
7.61291	7.85561	0.969105	F492	male_flowering_d6_GRANEROS_2015_OPT_qDTA8	AX-91102778	AX-91102704	135145003	Founder_prob	Haplotype_probs
-18.6041	7.2138	-2.57896	ND245	male_flowering_d6_GRANEROS_2015_OPT_qDTA8	AX-91102778	AX-91102704	135145003	Founder_prob	Haplotype_probs
19.5676	6.01581	3.2527	VA85	male_flowering_d6_GRANEROS_2015_OPT_qDTA8	AX-91102778	AX-91102704	135145003	Founder_prob	Haplotype_probs
6.72878	7.67808	0.876363	B73_inra	male_flowering_d6_NERAC_2016_WD_qDTA3_2	AX-90834975	AX-90834914	160684332	Founder_prob	600K_SNP
-4.39272	9.69947	-0.452882	A632_usa	male_flowering_d6_NERAC_2016_WD_qDTA3_2	AX-90834975	AX-90834914	160684332	Founder_prob	600K_SNP
-19.9385	8.04229	-2.4792	CO255_inra	male_flowering_d6_NERAC_2016_WD_qDTA3_2	AX-90834975	AX-90834914	160684332	Founder_prob	600K_SNP
-18.4469	8.39877	-2.19638	FV252_inra	male_flowering_d6_NERAC_2016_WD_qDTA3_2	AX-90834975	AX-90834914	160684332	Founder_prob	600K_SNP
23.7987	5.90067	4.03323	OH43_inra	male_flowering_d6_NERAC_2016_WD_qDTA3_2	AX-90834975	AX-90834914	160684332	Founder_prob	600K_SNP
-6.92533	8.83499	-0.783853	A654_inra	male_flowering_d6_NERAC_2016_WD_qDTA3_2	AX-90834975	AX-90834914	160684332	Founder_prob	600K_SNP
-16.6214	6.77408	-2.45368	FV2_inra	male_flowering_d6_NERAC_2016_WD_qDTA3_2	AX-90834975	AX-90834914	160684332	Founder_prob	600K_SNP
6.42613	6.55388	0.980508	C103_inra	male_flowering_d6_NERAC_2016_WD_qDTA3_2	AX-90834975	AX-90834914	160684332	Founder_prob	600K_SNP
-30.1132	6.97558	-4.31694	EP1_inra	male_flowering_d6_NERAC_2016_WD_qDTA3_2	AX-90834975	AX-90834914	160684332	Founder_prob	600K_SNP
-14.4766	8.13722	-1.77906	D105_inra	male_flowering_d6_NERAC_2016_WD_qDTA3_2	AX-90834975	AX-90834914	160684332	Founder_prob	600K_SNP
0.9551	9.82367	0.0972243	W117_inra	male_flowering_d6_NERAC_2016_WD_qDTA3_2	AX-90834975	AX-90834914	160684332	Founder_prob	600K_SNP
18.0072	5.63138	3.19766	B96	male_flowering_d6_NERAC_2016_WD_qDTA3_2	AX-90834975	AX-90834914	160684332	Founder_prob	600K_SNP
9.23614	5.23522	1.76423	DK63	male_flowering_d6_NERAC_2016_WD_qDTA3_2	AX-90834975	AX-90834914	160684332	Founder_prob	600K_SNP
1.23989	6.4473	0.192312	F492	male_flowering_d6_NERAC_2016_WD_qDTA3_2	AX-90834975	AX-90834914	160684332	Founder_prob	600K_SNP
-4.39762	6.96535	-0.631356	ND245	male_flowering_d6_NERAC_2016_WD_qDTA3_2	AX-90834975	AX-90834914	160684332	Founder_prob	600K_SNP
2.53941	7.11271	0.357025	VA85	male_flowering_d6_NERAC_2016_WD_qDTA3_2	AX-90834975	AX-90834914	160684332	Founder_prob	600K_SNP
20.2342	6.32575	3.19871	B73_inra	male_flowering_d6_NERAC_2016_WD_qDTA8	AX-91767208	AX-90622557	120465900	Founder_prob	600K_SNP
6.1745	7.81624	0.789958	A632_usa	male_flowering_d6_NERAC_2016_WD_qDTA8	AX-91767208	AX-90622557	120465900	Founder_prob	600K_SNP
-0.858478	5.71678	-0.150168	CO255_inra	male_flowering_d6_NERAC_2016_WD_qDTA8	AX-91767208	AX-90622557	120465900	Founder_prob	600K_SNP
10.9152	6.88992	1.58423	FV252_inra	male_flowering_d6_NERAC_2016_WD_qDTA8	AX-91767208	AX-90622557	120465900	Founder_prob	600K_SNP
0.972752	7.26235	0.133945	OH43_inra	male_flowering_d6_NERAC_2016_WD_qDTA8	AX-91767208	AX-90622557	120465900	Founder_prob	600K_SNP
-11.7232	5.1935	-2.25729	A654_inra	male_flowering_d6_NERAC_2016_WD_qDTA8	AX-91767208	AX-90622557	120465900	Founder_prob	600K_SNP
-10.2891	7.56183	-1.36066	FV2_inra	male_flowering_d6_NERAC_2016_WD_qDTA8	AX-91767208	AX-90622557	120465900	Founder_prob	600K_SNP
30.4281	9.80712	3.10265	C103_inra	male_flowering_d6_NERAC_2016_WD_qDTA8	AX-91767208	AX-90622557	120465900	Founder_prob	600K_SNP
-18.8117	6.32419	-2.97456	EP1_inra	male_flowering_d6_NERAC_2016_WD_qDTA8	AX-91767208	AX-90622557	120465900	Founder_prob	600K_SNP
-2.69269	5.89732	-0.456596	D105_inra	male_flowering_d6_NERAC_2016_WD_qDTA8	AX-91767208	AX-90622557	120465900	Founder_prob	600K_SNP
0.663983	7.38126	0.0899553	W117_inra	male_flowering_d6_NERAC_2016_WD_qDTA8	AX-91767208	AX-90622557	120465900	Founder_prob	600K_SNP
8.83169	10.5896	0.833993	B96	male_flowering_d6_NERAC_2016_WD_qDTA8	AX-91767208	AX-90622557	120465900	Founder_prob	600K_SNP
-10.407	6.0251	-1.72727	DK63	male_flowering_d6_NERAC_2016_WD_qDTA8	AX-91767208	AX-90622557	120465900	Founder_prob	600K_SNP
14.4365	10.2702	1.40567	F492	male_flowering_d6_NERAC_2016_WD_qDTA8	AX-91767208	AX-90622557	120465900	Founder_prob	600K_SNP
-22.277	8.23813	-2.70414	ND245	male_flowering_d6_NERAC_2016_WD_qDTA8	AX-91767208	AX-90622557	120465900	Founder_prob	600K_SNP
14.1756	7.10728	1.99453	VA85	male_flowering_d6_NERAC_2016_WD_qDTA8	AX-91767208	AX-90622557	120465900	Founder_prob	600K_SNP
6.72878	7.67808	0.876363	B73_inra	male_flowering_d6_NERAC_2016_WD_qDTA3_2	AX-90834914	AX-90834914	160426458	Founder_prob	Founder_probs
-4.39272	9.69947	-0.452882	A632_usa	male_flowering_d6_NERAC_2016_WD_qDTA3_2	AX-90834914	AX-90834914	160426458	Founder_prob	Founder_probs
-19.9385	8.04229	-2.4792	CO255_inra	male_flowering_d6_NERAC_2016_WD_qDTA3_2	AX-90834914	AX-90834914	160426458	Founder_prob	Founder_probs
-18.4469	8.39877	-2.19638	FV252_inra	male_flowering_d6_NERAC_2016_WD_qDTA3_2	AX-90834914	AX-90834914	160426458	Founder_prob	Founder_probs
23.7987	5.90067	4.03323	OH43_inra	male_flowering_d6_NERAC_2016_WD_qDTA3_2	AX-90834914	AX-90834914	160426458	Founder_prob	Founder_probs
-6.92533	8.83499	-0.783853	A654_inra	male_flowering_d6_NERAC_2016_WD_qDTA3_2	AX-90834914	AX-90834914	160426458	Founder_prob	Founder_probs
-16.6214	6.77408	-2.45368	FV2_inra	male_flowering_d6_NERAC_2016_WD_qDTA3_2	AX-90834914	AX-90834914	160426458	Founder_prob	Founder_probs
6.42613	6.55388	0.980508	C103_inra	male_flowering_d6_NERAC_2016_WD_qDTA3_2	AX-90834914	AX-90834914	160426458	Founder_prob	Founder_probs
-30.1132	6.97558	-4.31694	EP1_inra	male_flowering_d6_NERAC_2016_WD_qDTA3_2	AX-90834914	AX-90834914	160426458	Founder_prob	Founder_probs
-14.4766	8.13722	-1.77906	D105_inra	male_flowering_d6_NERAC_2016_WD_qDTA3_2	AX-90834914	AX-90834914	160426458	Founder_prob	Founder_probs
0.9551	9.82367	0.0972243	W117_inra	male_flowering_d6_NERAC_2016_WD_qDTA3_2	AX-90834914	AX-90834914	160426458	Founder_prob	Founder_probs
18.0072	5.63138	3.19766	B96	male_flowering_d6_NERAC_2016_WD_qDTA3_2	AX-90834914	AX-90834914	160426458	Founder_prob	Founder_probs
9.23614	5.23522	1.76423	DK63	male_flowering_d6_NERAC_2016_WD_qDTA3_2	AX-90834914	AX-90834914	160426458	Founder_prob	Founder_probs
1.23989	6.4473	0.192312	F492	male_flowering_d6_NERAC_2016_WD_qDTA3_2	AX-90834914	AX-90834914	160426458	Founder_prob	Founder_probs
-4.39762	6.96535	-0.631356	ND245	male_flowering_d6_NERAC_2016_WD_qDTA3_2	AX-90834914	AX-90834914	160426458	Founder_prob	Founder_probs
2.53941	7.11271	0.357025	VA85	male_flowering_d6_NERAC_2016_WD_qDTA3_2	AX-90834914	AX-90834914	160426458	Founder_prob	Founder_probs
6.03894	5.33702	1.13152	B73_inra	male_flowering_d6_NERAC_2016_WD_qDTA8	AX-91772402	AX-91772402	150234596	Founder_prob	Founder_probs
10.3769	6.41772	1.61692	A632_usa	male_flowering_d6_NERAC_2016_WD_qDTA8	AX-91772402	AX-91772402	150234596	Founder_prob	Founder_probs
-17.3487	6.25196	-2.77492	CO255_inra	male_flowering_d6_NERAC_2016_WD_qDTA8	AX-91772402	AX-91772402	150234596	Founder_prob	Founder_probs
5.9696	6.39396	0.933631	FV252_inra	male_flowering_d6_NERAC_2016_WD_qDTA8	AX-91772402	AX-91772402	150234596	Founder_prob	Founder_probs
13.1155	7.07582	1.85357	OH43_inra	male_flowering_d6_NERAC_2016_WD_qDTA8	AX-91772402	AX-91772402	150234596	Founder_prob	Founder_probs
-8.25802	6.36212	-1.298	A654_inra	male_flowering_d6_NERAC_2016_WD_qDTA8	AX-91772402	AX-91772402	150234596	Founder_prob	Founder_probs
-1.12653	5.58216	-0.201809	FV2_inra	male_flowering_d6_NERAC_2016_WD_qDTA8	AX-91772402	AX-91772402	150234596	Founder_prob	Founder_probs
36.189	8.8659	4.08182	C103_inra	male_flowering_d6_NERAC_2016_WD_qDTA8	AX-91772402	AX-91772402	150234596	Founder_prob	Founder_probs
-30.3364	8.11159	-3.73988	EP1_inra	male_flowering_d6_NERAC_2016_WD_qDTA8	AX-91772402	AX-91772402	150234596	Founder_prob	Founder_probs
-9.80804	5.79215	-1.69333	D105_inra	male_flowering_d6_NERAC_2016_WD_qDTA8	AX-91772402	AX-91772402	150234596	Founder_prob	Founder_probs
-13.5864	8.83673	-1.53749	W117_inra	male_flowering_d6_NERAC_2016_WD_qDTA8	AX-91772402	AX-91772402	150234596	Founder_prob	Founder_probs
14.4105	11.4701	1.25635	B96	male_flowering_d6_NERAC_2016_WD_qDTA8	AX-91772402	AX-91772402	150234596	Founder_prob	Founder_probs
-5.69342	6.72364	-0.846777	DK63	male_flowering_d6_NERAC_2016_WD_qDTA8	AX-91772402	AX-91772402	150234596	Founder_prob	Founder_probs
3.93702	10.7213	0.367214	F492	male_flowering_d6_NERAC_2016_WD_qDTA8	AX-91772402	AX-91772402	150234596	Founder_prob	Founder_probs
-7.94847	10.4735	-0.758916	ND245	male_flowering_d6_NERAC_2016_WD_qDTA8	AX-91772402	AX-91772402	150234596	Founder_prob	Founder_probs
11.8587	6.70529	1.76856	VA85	male_flowering_d6_NERAC_2016_WD_qDTA8	AX-91772402	AX-91772402	150234596	Founder_prob	Founder_probs
6.72878	7.67808	0.876363	B73_inra	male_flowering_d6_NERAC_2016_WD_qDTA3_2	AX-91583302	AX-90834914	160518557	Founder_prob	Haplotype_probs
-4.39272	9.69947	-0.452882	A632_usa	male_flowering_d6_NERAC_2016_WD_qDTA3_2	AX-91583302	AX-90834914	160518557	Founder_prob	Haplotype_probs
-19.9385	8.04229	-2.4792	CO255_inra	male_flowering_d6_NERAC_2016_WD_qDTA3_2	AX-91583302	AX-90834914	160518557	Founder_prob	Haplotype_probs
-18.4469	8.39877	-2.19638	FV252_inra	male_flowering_d6_NERAC_2016_WD_qDTA3_2	AX-91583302	AX-90834914	160518557	Founder_prob	Haplotype_probs
23.7987	5.90067	4.03323	OH43_inra	male_flowering_d6_NERAC_2016_WD_qDTA3_2	AX-91583302	AX-90834914	160518557	Founder_prob	Haplotype_probs
-6.92533	8.83499	-0.783853	A654_inra	male_flowering_d6_NERAC_2016_WD_qDTA3_2	AX-91583302	AX-90834914	160518557	Founder_prob	Haplotype_probs
-16.6214	6.77408	-2.45368	FV2_inra	male_flowering_d6_NERAC_2016_WD_qDTA3_2	AX-91583302	AX-90834914	160518557	Founder_prob	Haplotype_probs
6.42613	6.55388	0.980508	C103_inra	male_flowering_d6_NERAC_2016_WD_qDTA3_2	AX-91583302	AX-90834914	160518557	Founder_prob	Haplotype_probs
-30.1132	6.97558	-4.31694	EP1_inra	male_flowering_d6_NERAC_2016_WD_qDTA3_2	AX-91583302	AX-90834914	160518557	Founder_prob	Haplotype_probs
-14.4766	8.13722	-1.77906	D105_inra	male_flowering_d6_NERAC_2016_WD_qDTA3_2	AX-91583302	AX-90834914	160518557	Founder_prob	Haplotype_probs
0.9551	9.82367	0.0972243	W117_inra	male_flowering_d6_NERAC_2016_WD_qDTA3_2	AX-91583302	AX-90834914	160518557	Founder_prob	Haplotype_probs
18.0072	5.63138	3.19766	B96	male_flowering_d6_NERAC_2016_WD_qDTA3_2	AX-91583302	AX-90834914	160518557	Founder_prob	Haplotype_probs
9.23614	5.23522	1.76423	DK63	male_flowering_d6_NERAC_2016_WD_qDTA3_2	AX-91583302	AX-90834914	160518557	Founder_prob	Haplotype_probs
1.23989	6.4473	0.192312	F492	male_flowering_d6_NERAC_2016_WD_qDTA3_2	AX-91583302	AX-90834914	160518557	Founder_prob	Haplotype_probs
-4.39762	6.96535	-0.631356	ND245	male_flowering_d6_NERAC_2016_WD_qDTA3_2	AX-91583302	AX-90834914	160518557	Founder_prob	Haplotype_probs
2.53941	7.11271	0.357025	VA85	male_flowering_d6_NERAC_2016_WD_qDTA3_2	AX-91583302	AX-90834914	160518557	Founder_prob	Haplotype_probs
5.81358	5.42183	1.07226	B73_inra	male_flowering_d6_NERAC_2016_WD_qDTA8	PZE-108088314	AX-91106686	149988558	Founder_prob	Haplotype_probs
8.91797	6.19513	1.43951	A632_usa	male_flowering_d6_NERAC_2016_WD_qDTA8	PZE-108088314	AX-91106686	149988558	Founder_prob	Haplotype_probs
-17.2931	6.32045	-2.73605	CO255_inra	male_flowering_d6_NERAC_2016_WD_qDTA8	PZE-108088314	AX-91106686	149988558	Founder_prob	Haplotype_probs
6.67674	6.38135	1.04629	FV252_inra	male_flowering_d6_NERAC_2016_WD_qDTA8	PZE-108088314	AX-91106686	149988558	Founder_prob	Haplotype_probs
11.3827	7.38514	1.5413	OH43_inra	male_flowering_d6_NERAC_2016_WD_qDTA8	PZE-108088314	AX-91106686	149988558	Founder_prob	Haplotype_probs
-3.91785	6.90854	-0.567102	A654_inra	male_flowering_d6_NERAC_2016_WD_qDTA8	PZE-108088314	AX-91106686	149988558	Founder_prob	Haplotype_probs
-1.73563	5.98891	-0.289807	FV2_inra	male_flowering_d6_NERAC_2016_WD_qDTA8	PZE-108088314	AX-91106686	149988558	Founder_prob	Haplotype_probs
27.1541	8.46338	3.20842	C103_inra	male_flowering_d6_NERAC_2016_WD_qDTA8	PZE-108088314	AX-91106686	149988558	Founder_prob	Haplotype_probs
-31.797	7.931	-4.0092	EP1_inra	male_flowering_d6_NERAC_2016_WD_qDTA8	PZE-108088314	AX-91106686	149988558	Founder_prob	Haplotype_probs
-9.66494	5.87916	-1.64393	D105_inra	male_flowering_d6_NERAC_2016_WD_qDTA8	PZE-108088314	AX-91106686	149988558	Founder_prob	Haplotype_probs
-11.9046	8.86909	-1.34226	W117_inra	male_flowering_d6_NERAC_2016_WD_qDTA8	PZE-108088314	AX-91106686	149988558	Founder_prob	Haplotype_probs
16.5499	11.6862	1.41619	B96	male_flowering_d6_NERAC_2016_WD_qDTA8	PZE-108088314	AX-91106686	149988558	Founder_prob	Haplotype_probs
-3.77372	6.71832	-0.561706	DK63	male_flowering_d6_NERAC_2016_WD_qDTA8	PZE-108088314	AX-91106686	149988558	Founder_prob	Haplotype_probs
4.6222	10.8819	0.42476	F492	male_flowering_d6_NERAC_2016_WD_qDTA8	PZE-108088314	AX-91106686	149988558	Founder_prob	Haplotype_probs
-9.12987	10.6534	-0.856989	ND245	male_flowering_d6_NERAC_2016_WD_qDTA8	PZE-108088314	AX-91106686	149988558	Founder_prob	Haplotype_probs
12.2222	6.80411	1.7963	VA85	male_flowering_d6_NERAC_2016_WD_qDTA8	PZE-108088314	AX-91106686	149988558	Founder_prob	Haplotype_probs
-7.9351	6.26868	-1.26583	B73_inra	male_flowering_d6_STPAUL_2017_WD_qDTA3_2	PZB00228.4	PZE-103093413	156128886	Founder_prob	600K_SNP
4.22744	9.46661	0.446562	A632_usa	male_flowering_d6_STPAUL_2017_WD_qDTA3_2	PZB00228.4	PZE-103093413	156128886	Founder_prob	600K_SNP
-19.1115	7.1717	-2.66485	CO255_inra	male_flowering_d6_STPAUL_2017_WD_qDTA3_2	PZB00228.4	PZE-103093413	156128886	Founder_prob	600K_SNP
-23.4065	6.88093	-3.40165	FV252_inra	male_flowering_d6_STPAUL_2017_WD_qDTA3_2	PZB00228.4	PZE-103093413	156128886	Founder_prob	600K_SNP
8.86724	4.73769	1.87164	OH43_inra	male_flowering_d6_STPAUL_2017_WD_qDTA3_2	PZB00228.4	PZE-103093413	156128886	Founder_prob	600K_SNP
0.0582547	7.15559	0.00814115	A654_inra	male_flowering_d6_STPAUL_2017_WD_qDTA3_2	PZB00228.4	PZE-103093413	156128886	Founder_prob	600K_SNP
0.181144	4.9772	0.0363948	FV2_inra	male_flowering_d6_STPAUL_2017_WD_qDTA3_2	PZB00228.4	PZE-103093413	156128886	Founder_prob	600K_SNP
1.62341	5.14397	0.315596	C103_inra	male_flowering_d6_STPAUL_2017_WD_qDTA3_2	PZB00228.4	PZE-103093413	156128886	Founder_prob	600K_SNP
-14.1653	5.51757	-2.56731	EP1_inra	male_flowering_d6_STPAUL_2017_WD_qDTA3_2	PZB00228.4	PZE-103093413	156128886	Founder_prob	600K_SNP
-8.36102	7.21341	-1.15909	D105_inra	male_flowering_d6_STPAUL_2017_WD_qDTA3_2	PZB00228.4	PZE-103093413	156128886	Founder_prob	600K_SNP
-2.35765	6.99363	-0.337115	W117_inra	male_flowering_d6_STPAUL_2017_WD_qDTA3_2	PZB00228.4	PZE-103093413	156128886	Founder_prob	600K_SNP
28.253	5.16002	5.47537	B96	male_flowering_d6_STPAUL_2017_WD_qDTA3_2	PZB00228.4	PZE-103093413	156128886	Founder_prob	600K_SNP
7.15927	4.64525	1.5412	DK63	male_flowering_d6_STPAUL_2017_WD_qDTA3_2	PZB00228.4	PZE-103093413	156128886	Founder_prob	600K_SNP
-4.15128	5.20562	-0.797462	F492	male_flowering_d6_STPAUL_2017_WD_qDTA3_2	PZB00228.4	PZE-103093413	156128886	Founder_prob	600K_SNP
1.40349	6.0228	0.233029	ND245	male_flowering_d6_STPAUL_2017_WD_qDTA3_2	PZB00228.4	PZE-103093413	156128886	Founder_prob	600K_SNP
2.12725	5.9498	0.357533	VA85	male_flowering_d6_STPAUL_2017_WD_qDTA3_2	PZB00228.4	PZE-103093413	156128886	Founder_prob	600K_SNP
15.9316	4.90654	3.24701	B73_inra	male_flowering_d6_STPAUL_2017_WD_qDTA8	PZE-108070380	AX-91768118	126885610	Founder_prob	600K_SNP
11.2287	6.64425	1.68999	A632_usa	male_flowering_d6_STPAUL_2017_WD_qDTA8	PZE-108070380	AX-91768118	126885610	Founder_prob	600K_SNP
-7.37415	5.03494	-1.46459	CO255_inra	male_flowering_d6_STPAUL_2017_WD_qDTA8	PZE-108070380	AX-91768118	126885610	Founder_prob	600K_SNP
7.03671	6.10836	1.15198	FV252_inra	male_flowering_d6_STPAUL_2017_WD_qDTA8	PZE-108070380	AX-91768118	126885610	Founder_prob	600K_SNP
7.62634	7.2171	1.0567	OH43_inra	male_flowering_d6_STPAUL_2017_WD_qDTA8	PZE-108070380	AX-91768118	126885610	Founder_prob	600K_SNP
-8.42474	4.55314	-1.85032	A654_inra	male_flowering_d6_STPAUL_2017_WD_qDTA8	PZE-108070380	AX-91768118	126885610	Founder_prob	600K_SNP
-2.29575	5.96527	-0.384853	FV2_inra	male_flowering_d6_STPAUL_2017_WD_qDTA8	PZE-108070380	AX-91768118	126885610	Founder_prob	600K_SNP
6.26732	7.60484	0.824122	C103_inra	male_flowering_d6_STPAUL_2017_WD_qDTA8	PZE-108070380	AX-91768118	126885610	Founder_prob	600K_SNP
-15.3777	6.11556	-2.51453	EP1_inra	male_flowering_d6_STPAUL_2017_WD_qDTA8	PZE-108070380	AX-91768118	126885610	Founder_prob	600K_SNP
-1.61363	5.01466	-0.321782	D105_inra	male_flowering_d6_STPAUL_2017_WD_qDTA8	PZE-108070380	AX-91768118	126885610	Founder_prob	600K_SNP
0.677421	6.0485	0.111998	W117_inra	male_flowering_d6_STPAUL_2017_WD_qDTA8	PZE-108070380	AX-91768118	126885610	Founder_prob	600K_SNP
27.2397	8.23146	3.30922	B96	male_flowering_d6_STPAUL_2017_WD_qDTA8	PZE-108070380	AX-91768118	126885610	Founder_prob	600K_SNP
-19.7442	5.39757	-3.65798	DK63	male_flowering_d6_STPAUL_2017_WD_qDTA8	PZE-108070380	AX-91768118	126885610	Founder_prob	600K_SNP
6.92693	8.01448	0.864302	F492	male_flowering_d6_STPAUL_2017_WD_qDTA8	PZE-108070380	AX-91768118	126885610	Founder_prob	600K_SNP
-6.59926	6.71565	-0.982669	ND245	male_flowering_d6_STPAUL_2017_WD_qDTA8	PZE-108070380	AX-91768118	126885610	Founder_prob	600K_SNP
2.91442	6.48033	0.449734	VA85	male_flowering_d6_STPAUL_2017_WD_qDTA8	PZE-108070380	AX-91768118	126885610	Founder_prob	600K_SNP
-7.9351	6.26868	-1.26583	B73_inra	male_flowering_d6_STPAUL_2017_WD_qDTA3_2	PZE-103093413	PZE-103093413	155999962	Founder_prob	Founder_probs
4.22744	9.46661	0.446562	A632_usa	male_flowering_d6_STPAUL_2017_WD_qDTA3_2	PZE-103093413	PZE-103093413	155999962	Founder_prob	Founder_probs
-19.1115	7.1717	-2.66485	CO255_inra	male_flowering_d6_STPAUL_2017_WD_qDTA3_2	PZE-103093413	PZE-103093413	155999962	Founder_prob	Founder_probs
-23.4065	6.88093	-3.40165	FV252_inra	male_flowering_d6_STPAUL_2017_WD_qDTA3_2	PZE-103093413	PZE-103093413	155999962	Founder_prob	Founder_probs
8.86724	4.73769	1.87164	OH43_inra	male_flowering_d6_STPAUL_2017_WD_qDTA3_2	PZE-103093413	PZE-103093413	155999962	Founder_prob	Founder_probs
0.0582547	7.15559	0.00814115	A654_inra	male_flowering_d6_STPAUL_2017_WD_qDTA3_2	PZE-103093413	PZE-103093413	155999962	Founder_prob	Founder_probs
0.181144	4.9772	0.0363948	FV2_inra	male_flowering_d6_STPAUL_2017_WD_qDTA3_2	PZE-103093413	PZE-103093413	155999962	Founder_prob	Founder_probs
1.62341	5.14397	0.315596	C103_inra	male_flowering_d6_STPAUL_2017_WD_qDTA3_2	PZE-103093413	PZE-103093413	155999962	Founder_prob	Founder_probs
-14.1653	5.51757	-2.56731	EP1_inra	male_flowering_d6_STPAUL_2017_WD_qDTA3_2	PZE-103093413	PZE-103093413	155999962	Founder_prob	Founder_probs
-8.36102	7.21341	-1.15909	D105_inra	male_flowering_d6_STPAUL_2017_WD_qDTA3_2	PZE-103093413	PZE-103093413	155999962	Founder_prob	Founder_probs
-2.35765	6.99363	-0.337115	W117_inra	male_flowering_d6_STPAUL_2017_WD_qDTA3_2	PZE-103093413	PZE-103093413	155999962	Founder_prob	Founder_probs
28.253	5.16002	5.47537	B96	male_flowering_d6_STPAUL_2017_WD_qDTA3_2	PZE-103093413	PZE-103093413	155999962	Founder_prob	Founder_probs
7.15927	4.64525	1.5412	DK63	male_flowering_d6_STPAUL_2017_WD_qDTA3_2	PZE-103093413	PZE-103093413	155999962	Founder_prob	Founder_probs
-4.15128	5.20562	-0.797462	F492	male_flowering_d6_STPAUL_2017_WD_qDTA3_2	PZE-103093413	PZE-103093413	155999962	Founder_prob	Founder_probs
1.40349	6.0228	0.233029	ND245	male_flowering_d6_STPAUL_2017_WD_qDTA3_2	PZE-103093413	PZE-103093413	155999962	Founder_prob	Founder_probs
2.12725	5.9498	0.357533	VA85	male_flowering_d6_STPAUL_2017_WD_qDTA3_2	PZE-103093413	PZE-103093413	155999962	Founder_prob	Founder_probs
7.76912	4.74607	1.63696	B73_inra	male_flowering_d6_STPAUL_2017_WD_qDTA8	AX-91771730	AX-91771730	146686920	Founder_prob	Founder_probs
11.1803	5.34123	2.09321	A632_usa	male_flowering_d6_STPAUL_2017_WD_qDTA8	AX-91771730	AX-91771730	146686920	Founder_prob	Founder_probs
-8.0772	4.95116	-1.63137	CO255_inra	male_flowering_d6_STPAUL_2017_WD_qDTA8	AX-91771730	AX-91771730	146686920	Founder_prob	Founder_probs
5.1289	5.65045	0.907698	FV252_inra	male_flowering_d6_STPAUL_2017_WD_qDTA8	AX-91771730	AX-91771730	146686920	Founder_prob	Founder_probs
11.2746	5.85631	1.92521	OH43_inra	male_flowering_d6_STPAUL_2017_WD_qDTA8	AX-91771730	AX-91771730	146686920	Founder_prob	Founder_probs
-4.60147	5.29811	-0.868512	A654_inra	male_flowering_d6_STPAUL_2017_WD_qDTA8	AX-91771730	AX-91771730	146686920	Founder_prob	Founder_probs
-1.91829	5.69438	-0.336875	FV2_inra	male_flowering_d6_STPAUL_2017_WD_qDTA8	AX-91771730	AX-91771730	146686920	Founder_prob	Founder_probs
13.6162	6.53972	2.08208	C103_inra	male_flowering_d6_STPAUL_2017_WD_qDTA8	AX-91771730	AX-91771730	146686920	Founder_prob	Founder_probs
-20.2666	6.43216	-3.15083	EP1_inra	male_flowering_d6_STPAUL_2017_WD_qDTA8	AX-91771730	AX-91771730	146686920	Founder_prob	Founder_probs
-8.50331	4.79647	-1.77283	D105_inra	male_flowering_d6_STPAUL_2017_WD_qDTA8	AX-91771730	AX-91771730	146686920	Founder_prob	Founder_probs
-15.0134	6.15365	-2.43976	W117_inra	male_flowering_d6_STPAUL_2017_WD_qDTA8	AX-91771730	AX-91771730	146686920	Founder_prob	Founder_probs
31.3286	10.1414	3.08917	B96	male_flowering_d6_STPAUL_2017_WD_qDTA8	AX-91771730	AX-91771730	146686920	Founder_prob	Founder_probs
-13.6777	4.90865	-2.78645	DK63	male_flowering_d6_STPAUL_2017_WD_qDTA8	AX-91771730	AX-91771730	146686920	Founder_prob	Founder_probs
3.13051	8.3188	0.376318	F492	male_flowering_d6_STPAUL_2017_WD_qDTA8	AX-91771730	AX-91771730	146686920	Founder_prob	Founder_probs
1.48352	9.35436	0.158591	ND245	male_flowering_d6_STPAUL_2017_WD_qDTA8	AX-91771730	AX-91771730	146686920	Founder_prob	Founder_probs
17.2023	5.92794	2.9019	VA85	male_flowering_d6_STPAUL_2017_WD_qDTA8	AX-91771730	AX-91771730	146686920	Founder_prob	Founder_probs
-5.80647	6.94733	-0.835783	B73_inra	male_flowering_d6_STPAUL_2017_WD_qDTA9	AX-91145110	AX-91145110	116613531	Founder_prob	Founder_probs
-19.4985	6.86796	-2.83906	A632_usa	male_flowering_d6_STPAUL_2017_WD_qDTA9	AX-91145110	AX-91145110	116613531	Founder_prob	Founder_probs
-5.38237	5.07047	-1.06151	CO255_inra	male_flowering_d6_STPAUL_2017_WD_qDTA9	AX-91145110	AX-91145110	116613531	Founder_prob	Founder_probs
-7.6543	5.86807	-1.3044	FV252_inra	male_flowering_d6_STPAUL_2017_WD_qDTA9	AX-91145110	AX-91145110	116613531	Founder_prob	Founder_probs
0.387873	6.41043	0.0605065	OH43_inra	male_flowering_d6_STPAUL_2017_WD_qDTA9	AX-91145110	AX-91145110	116613531	Founder_prob	Founder_probs
-0.319249	4.67968	-0.0682204	A654_inra	male_flowering_d6_STPAUL_2017_WD_qDTA9	AX-91145110	AX-91145110	116613531	Founder_prob	Founder_probs
-0.510309	6.90688	-0.0738842	FV2_inra	male_flowering_d6_STPAUL_2017_WD_qDTA9	AX-91145110	AX-91145110	116613531	Founder_prob	Founder_probs
1.9065	6.66758	0.285936	C103_inra	male_flowering_d6_STPAUL_2017_WD_qDTA9	AX-91145110	AX-91145110	116613531	Founder_prob	Founder_probs
5.59366	5.38382	1.03898	EP1_inra	male_flowering_d6_STPAUL_2017_WD_qDTA9	AX-91145110	AX-91145110	116613531	Founder_prob	Founder_probs
6.63322	5.06067	1.31074	D105_inra	male_flowering_d6_STPAUL_2017_WD_qDTA9	AX-91145110	AX-91145110	116613531	Founder_prob	Founder_probs
19.0356	5.27731	3.60706	W117_inra	male_flowering_d6_STPAUL_2017_WD_qDTA9	AX-91145110	AX-91145110	116613531	Founder_prob	Founder_probs
27.0734	6.51845	4.15334	B96	male_flowering_d6_STPAUL_2017_WD_qDTA9	AX-91145110	AX-91145110	116613531	Founder_prob	Founder_probs
-14.0352	5.61403	-2.50002	DK63	male_flowering_d6_STPAUL_2017_WD_qDTA9	AX-91145110	AX-91145110	116613531	Founder_prob	Founder_probs
-1.34103	6.41394	-0.20908	F492	male_flowering_d6_STPAUL_2017_WD_qDTA9	AX-91145110	AX-91145110	116613531	Founder_prob	Founder_probs
4.70439	13.9764	0.336596	ND245	male_flowering_d6_STPAUL_2017_WD_qDTA9	AX-91145110	AX-91145110	116613531	Founder_prob	Founder_probs
-8.31369	4.89622	-1.69798	VA85	male_flowering_d6_STPAUL_2017_WD_qDTA9	AX-91145110	AX-91145110	116613531	Founder_prob	Founder_probs
-7.9351	6.26868	-1.26583	B73_inra	male_flowering_d6_STPAUL_2017_WD_qDTA3_2	AX-90834152	PZE-103093413	157175061	Founder_prob	Haplotype_probs
4.22744	9.46661	0.446562	A632_usa	male_flowering_d6_STPAUL_2017_WD_qDTA3_2	AX-90834152	PZE-103093413	157175061	Founder_prob	Haplotype_probs
-19.1115	7.1717	-2.66485	CO255_inra	male_flowering_d6_STPAUL_2017_WD_qDTA3_2	AX-90834152	PZE-103093413	157175061	Founder_prob	Haplotype_probs
-23.4065	6.88093	-3.40165	FV252_inra	male_flowering_d6_STPAUL_2017_WD_qDTA3_2	AX-90834152	PZE-103093413	157175061	Founder_prob	Haplotype_probs
8.86724	4.73769	1.87164	OH43_inra	male_flowering_d6_STPAUL_2017_WD_qDTA3_2	AX-90834152	PZE-103093413	157175061	Founder_prob	Haplotype_probs
0.0582547	7.15559	0.00814115	A654_inra	male_flowering_d6_STPAUL_2017_WD_qDTA3_2	AX-90834152	PZE-103093413	157175061	Founder_prob	Haplotype_probs
0.181144	4.9772	0.0363948	FV2_inra	male_flowering_d6_STPAUL_2017_WD_qDTA3_2	AX-90834152	PZE-103093413	157175061	Founder_prob	Haplotype_probs
1.62341	5.14397	0.315596	C103_inra	male_flowering_d6_STPAUL_2017_WD_qDTA3_2	AX-90834152	PZE-103093413	157175061	Founder_prob	Haplotype_probs
-14.1653	5.51757	-2.56731	EP1_inra	male_flowering_d6_STPAUL_2017_WD_qDTA3_2	AX-90834152	PZE-103093413	157175061	Founder_prob	Haplotype_probs
-8.36102	7.21341	-1.15909	D105_inra	male_flowering_d6_STPAUL_2017_WD_qDTA3_2	AX-90834152	PZE-103093413	157175061	Founder_prob	Haplotype_probs
-2.35765	6.99363	-0.337115	W117_inra	male_flowering_d6_STPAUL_2017_WD_qDTA3_2	AX-90834152	PZE-103093413	157175061	Founder_prob	Haplotype_probs
28.253	5.16002	5.47537	B96	male_flowering_d6_STPAUL_2017_WD_qDTA3_2	AX-90834152	PZE-103093413	157175061	Founder_prob	Haplotype_probs
7.15927	4.64525	1.5412	DK63	male_flowering_d6_STPAUL_2017_WD_qDTA3_2	AX-90834152	PZE-103093413	157175061	Founder_prob	Haplotype_probs
-4.15128	5.20562	-0.797462	F492	male_flowering_d6_STPAUL_2017_WD_qDTA3_2	AX-90834152	PZE-103093413	157175061	Founder_prob	Haplotype_probs
1.40349	6.0228	0.233029	ND245	male_flowering_d6_STPAUL_2017_WD_qDTA3_2	AX-90834152	PZE-103093413	157175061	Founder_prob	Haplotype_probs
2.12725	5.9498	0.357533	VA85	male_flowering_d6_STPAUL_2017_WD_qDTA3_2	AX-90834152	PZE-103093413	157175061	Founder_prob	Haplotype_probs
13.0258	4.58608	2.84028	B73_inra	male_flowering_d6_STPAUL_2017_WD_qDTA8	AX-91101099	PZA01038.1	128743539	Founder_prob	Haplotype_probs
11.3944	6.98007	1.63242	A632_usa	male_flowering_d6_STPAUL_2017_WD_qDTA8	AX-91101099	PZA01038.1	128743539	Founder_prob	Haplotype_probs
-8.54799	4.71651	-1.81236	CO255_inra	male_flowering_d6_STPAUL_2017_WD_qDTA8	AX-91101099	PZA01038.1	128743539	Founder_prob	Haplotype_probs
6.23518	5.98454	1.04188	FV252_inra	male_flowering_d6_STPAUL_2017_WD_qDTA8	AX-91101099	PZA01038.1	128743539	Founder_prob	Haplotype_probs
12.3443	7.98897	1.54517	OH43_inra	male_flowering_d6_STPAUL_2017_WD_qDTA8	AX-91101099	PZA01038.1	128743539	Founder_prob	Haplotype_probs
-10.1931	4.83359	-2.10881	A654_inra	male_flowering_d6_STPAUL_2017_WD_qDTA8	AX-91101099	PZA01038.1	128743539	Founder_prob	Haplotype_probs
-3.00999	5.01656	-0.600011	FV2_inra	male_flowering_d6_STPAUL_2017_WD_qDTA8	AX-91101099	PZA01038.1	128743539	Founder_prob	Haplotype_probs
10.0323	6.78913	1.4777	C103_inra	male_flowering_d6_STPAUL_2017_WD_qDTA8	AX-91101099	PZA01038.1	128743539	Founder_prob	Haplotype_probs
-20.9193	6.82331	-3.06586	EP1_inra	male_flowering_d6_STPAUL_2017_WD_qDTA8	AX-91101099	PZA01038.1	128743539	Founder_prob	Haplotype_probs
-6.98256	4.55246	-1.5338	D105_inra	male_flowering_d6_STPAUL_2017_WD_qDTA8	AX-91101099	PZA01038.1	128743539	Founder_prob	Haplotype_probs
-0.0485205	5.5335	-0.00876849	W117_inra	male_flowering_d6_STPAUL_2017_WD_qDTA8	AX-91101099	PZA01038.1	128743539	Founder_prob	Haplotype_probs
25.9175	7.69074	3.36996	B96	male_flowering_d6_STPAUL_2017_WD_qDTA8	AX-91101099	PZA01038.1	128743539	Founder_prob	Haplotype_probs
-20.8074	5.73321	-3.62928	DK63	male_flowering_d6_STPAUL_2017_WD_qDTA8	AX-91101099	PZA01038.1	128743539	Founder_prob	Haplotype_probs
9.37738	8.14169	1.15177	F492	male_flowering_d6_STPAUL_2017_WD_qDTA8	AX-91101099	PZA01038.1	128743539	Founder_prob	Haplotype_probs
-2.58135	6.81708	-0.378659	ND245	male_flowering_d6_STPAUL_2017_WD_qDTA8	AX-91101099	PZA01038.1	128743539	Founder_prob	Haplotype_probs
16.3587	7.47564	2.18827	VA85	male_flowering_d6_STPAUL_2017_WD_qDTA8	AX-91101099	PZA01038.1	128743539	Founder_prob	Haplotype_probs
-8.96987	7.26876	-1.23403	B73_inra	male_flowering_d6_STPAUL_2017_WD_qDTA9	AX-91799201	AX-91144556	114817909	Founder_prob	Haplotype_probs
-19.6361	6.88218	-2.85319	A632_usa	male_flowering_d6_STPAUL_2017_WD_qDTA9	AX-91799201	AX-91144556	114817909	Founder_prob	Haplotype_probs
-3.52662	4.75815	-0.741174	CO255_inra	male_flowering_d6_STPAUL_2017_WD_qDTA9	AX-91799201	AX-91144556	114817909	Founder_prob	Haplotype_probs
-5.98093	6.03028	-0.991816	FV252_inra	male_flowering_d6_STPAUL_2017_WD_qDTA9	AX-91799201	AX-91144556	114817909	Founder_prob	Haplotype_probs
1.01888	6.7672	0.150561	OH43_inra	male_flowering_d6_STPAUL_2017_WD_qDTA9	AX-91799201	AX-91144556	114817909	Founder_prob	Haplotype_probs
-1.07523	4.83409	-0.222428	A654_inra	male_flowering_d6_STPAUL_2017_WD_qDTA9	AX-91799201	AX-91144556	114817909	Founder_prob	Haplotype_probs
-3.15655	6.99885	-0.45101	FV2_inra	male_flowering_d6_STPAUL_2017_WD_qDTA9	AX-91799201	AX-91144556	114817909	Founder_prob	Haplotype_probs
2.12744	6.68081	0.318441	C103_inra	male_flowering_d6_STPAUL_2017_WD_qDTA9	AX-91799201	AX-91144556	114817909	Founder_prob	Haplotype_probs
5.8287	5.37882	1.08364	EP1_inra	male_flowering_d6_STPAUL_2017_WD_qDTA9	AX-91799201	AX-91144556	114817909	Founder_prob	Haplotype_probs
6.53505	4.96842	1.31532	D105_inra	male_flowering_d6_STPAUL_2017_WD_qDTA9	AX-91799201	AX-91144556	114817909	Founder_prob	Haplotype_probs
15.9028	5.11916	3.10652	W117_inra	male_flowering_d6_STPAUL_2017_WD_qDTA9	AX-91799201	AX-91144556	114817909	Founder_prob	Haplotype_probs
26.7376	5.98613	4.46658	B96	male_flowering_d6_STPAUL_2017_WD_qDTA9	AX-91799201	AX-91144556	114817909	Founder_prob	Haplotype_probs
-11.8053	5.56652	-2.12077	DK63	male_flowering_d6_STPAUL_2017_WD_qDTA9	AX-91799201	AX-91144556	114817909	Founder_prob	Haplotype_probs
-8.6411	6.44321	-1.34112	F492	male_flowering_d6_STPAUL_2017_WD_qDTA9	AX-91799201	AX-91144556	114817909	Founder_prob	Haplotype_probs
4.62128	17.4932	0.264175	ND245	male_flowering_d6_STPAUL_2017_WD_qDTA9	AX-91799201	AX-91144556	114817909	Founder_prob	Haplotype_probs
-6.35529	5.23962	-1.21293	VA85	male_flowering_d6_STPAUL_2017_WD_qDTA9	AX-91799201	AX-91144556	114817909	Founder_prob	Haplotype_probs
8.11532	3.52504	2.30219	B73_inra	male_flowering_d6_SZEGED_2017_OPT_qDTA8	AX-91103301	AX-91103124	137170932	Founder_prob	600K_SNP
15.6736	6.17649	2.53762	A632_usa	male_flowering_d6_SZEGED_2017_OPT_qDTA8	AX-91103301	AX-91103124	137170932	Founder_prob	600K_SNP
-5.58348	4.35414	-1.28234	CO255_inra	male_flowering_d6_SZEGED_2017_OPT_qDTA8	AX-91103301	AX-91103124	137170932	Founder_prob	600K_SNP
5.46236	5.56181	0.982118	FV252_inra	male_flowering_d6_SZEGED_2017_OPT_qDTA8	AX-91103301	AX-91103124	137170932	Founder_prob	600K_SNP
-2.9425	5.98325	-0.491789	A654_inra	male_flowering_d6_SZEGED_2017_OPT_qDTA8	AX-91103301	AX-91103124	137170932	Founder_prob	600K_SNP
-6.87921	5.11918	-1.34381	FV2_inra	male_flowering_d6_SZEGED_2017_OPT_qDTA8	AX-91103301	AX-91103124	137170932	Founder_prob	600K_SNP
5.62573	5.32195	1.05708	C103_inra	male_flowering_d6_SZEGED_2017_OPT_qDTA8	AX-91103301	AX-91103124	137170932	Founder_prob	600K_SNP
-17.9189	5.93845	-3.01743	EP1_inra	male_flowering_d6_SZEGED_2017_OPT_qDTA8	AX-91103301	AX-91103124	137170932	Founder_prob	600K_SNP
-5.6454	4.19777	-1.34486	D105_inra	male_flowering_d6_SZEGED_2017_OPT_qDTA8	AX-91103301	AX-91103124	137170932	Founder_prob	600K_SNP
0.855148	5.91697	0.144525	W117_inra	male_flowering_d6_SZEGED_2017_OPT_qDTA8	AX-91103301	AX-91103124	137170932	Founder_prob	600K_SNP
25.1838	9.73378	2.58725	B96	male_flowering_d6_SZEGED_2017_OPT_qDTA8	AX-91103301	AX-91103124	137170932	Founder_prob	600K_SNP
-9.72439	5.42907	-1.79117	DK63	male_flowering_d6_SZEGED_2017_OPT_qDTA8	AX-91103301	AX-91103124	137170932	Founder_prob	600K_SNP
4.734	7.2538	0.652623	F492	male_flowering_d6_SZEGED_2017_OPT_qDTA8	AX-91103301	AX-91103124	137170932	Founder_prob	600K_SNP
-14.0919	6.774	-2.08029	ND245	male_flowering_d6_SZEGED_2017_OPT_qDTA8	AX-91103301	AX-91103124	137170932	Founder_prob	600K_SNP
12.6202	6.16406	2.04738	VA85	male_flowering_d6_SZEGED_2017_OPT_qDTA8	AX-91103301	AX-91103124	137170932	Founder_prob	600K_SNP
5.99755	4.36294	1.37466	B73_inra	male_flowering_d6_SZEGED_2017_OPT_qDTA8	AX-91771730	AX-91771730	146686920	Founder_prob	Founder_probs
10.3155	4.77442	2.16057	A632_usa	male_flowering_d6_SZEGED_2017_OPT_qDTA8	AX-91771730	AX-91771730	146686920	Founder_prob	Founder_probs
-9.2835	4.5076	-2.05952	CO255_inra	male_flowering_d6_SZEGED_2017_OPT_qDTA8	AX-91771730	AX-91771730	146686920	Founder_prob	Founder_probs
3.62335	5.13114	0.706149	FV252_inra	male_flowering_d6_SZEGED_2017_OPT_qDTA8	AX-91771730	AX-91771730	146686920	Founder_prob	Founder_probs
17.4479	5.44177	3.2063	OH43_inra	male_flowering_d6_SZEGED_2017_OPT_qDTA8	AX-91771730	AX-91771730	146686920	Founder_prob	Founder_probs
-5.13505	4.80861	-1.06789	A654_inra	male_flowering_d6_SZEGED_2017_OPT_qDTA8	AX-91771730	AX-91771730	146686920	Founder_prob	Founder_probs
-5.05964	5.16723	-0.979177	FV2_inra	male_flowering_d6_SZEGED_2017_OPT_qDTA8	AX-91771730	AX-91771730	146686920	Founder_prob	Founder_probs
6.22816	6.04571	1.03018	C103_inra	male_flowering_d6_SZEGED_2017_OPT_qDTA8	AX-91771730	AX-91771730	146686920	Founder_prob	Founder_probs
-25.4451	5.99271	-4.24601	EP1_inra	male_flowering_d6_SZEGED_2017_OPT_qDTA8	AX-91771730	AX-91771730	146686920	Founder_prob	Founder_probs
-8.68533	4.36318	-1.9906	D105_inra	male_flowering_d6_SZEGED_2017_OPT_qDTA8	AX-91771730	AX-91771730	146686920	Founder_prob	Founder_probs
-8.97483	5.72096	-1.56876	W117_inra	male_flowering_d6_SZEGED_2017_OPT_qDTA8	AX-91771730	AX-91771730	146686920	Founder_prob	Founder_probs
19.8704	8.81414	2.25438	B96	male_flowering_d6_SZEGED_2017_OPT_qDTA8	AX-91771730	AX-91771730	146686920	Founder_prob	Founder_probs
-4.29377	4.57542	-0.938443	DK63	male_flowering_d6_SZEGED_2017_OPT_qDTA8	AX-91771730	AX-91771730	146686920	Founder_prob	Founder_probs
11.8309	7.36455	1.60647	F492	male_flowering_d6_SZEGED_2017_OPT_qDTA8	AX-91771730	AX-91771730	146686920	Founder_prob	Founder_probs
-3.90194	8.08135	-0.482833	ND245	male_flowering_d6_SZEGED_2017_OPT_qDTA8	AX-91771730	AX-91771730	146686920	Founder_prob	Founder_probs
10.6333	5.37301	1.97903	VA85	male_flowering_d6_SZEGED_2017_OPT_qDTA8	AX-91771730	AX-91771730	146686920	Founder_prob	Founder_probs
5.99755	4.36294	1.37466	B73_inra	male_flowering_d6_SZEGED_2017_OPT_qDTA8	PZE-108085812	AX-91771730	146992030	Founder_prob	Haplotype_probs
10.3155	4.77442	2.16057	A632_usa	male_flowering_d6_SZEGED_2017_OPT_qDTA8	PZE-108085812	AX-91771730	146992030	Founder_prob	Haplotype_probs
-9.2835	4.5076	-2.05952	CO255_inra	male_flowering_d6_SZEGED_2017_OPT_qDTA8	PZE-108085812	AX-91771730	146992030	Founder_prob	Haplotype_probs
3.62335	5.13114	0.706149	FV252_inra	male_flowering_d6_SZEGED_2017_OPT_qDTA8	PZE-108085812	AX-91771730	146992030	Founder_prob	Haplotype_probs
17.4479	5.44177	3.2063	OH43_inra	male_flowering_d6_SZEGED_2017_OPT_qDTA8	PZE-108085812	AX-91771730	146992030	Founder_prob	Haplotype_probs
-5.13505	4.80861	-1.06789	A654_inra	male_flowering_d6_SZEGED_2017_OPT_qDTA8	PZE-108085812	AX-91771730	146992030	Founder_prob	Haplotype_probs
-5.05964	5.16723	-0.979177	FV2_inra	male_flowering_d6_SZEGED_2017_OPT_qDTA8	PZE-108085812	AX-91771730	146992030	Founder_prob	Haplotype_probs
6.22816	6.04571	1.03018	C103_inra	male_flowering_d6_SZEGED_2017_OPT_qDTA8	PZE-108085812	AX-91771730	146992030	Founder_prob	Haplotype_probs
-25.4451	5.99271	-4.24601	EP1_inra	male_flowering_d6_SZEGED_2017_OPT_qDTA8	PZE-108085812	AX-91771730	146992030	Founder_prob	Haplotype_probs
-8.68533	4.36318	-1.9906	D105_inra	male_flowering_d6_SZEGED_2017_OPT_qDTA8	PZE-108085812	AX-91771730	146992030	Founder_prob	Haplotype_probs
-8.97483	5.72096	-1.56876	W117_inra	male_flowering_d6_SZEGED_2017_OPT_qDTA8	PZE-108085812	AX-91771730	146992030	Founder_prob	Haplotype_probs
19.8704	8.81414	2.25438	B96	male_flowering_d6_SZEGED_2017_OPT_qDTA8	PZE-108085812	AX-91771730	146992030	Founder_prob	Haplotype_probs
-4.29377	4.57542	-0.938443	DK63	male_flowering_d6_SZEGED_2017_OPT_qDTA8	PZE-108085812	AX-91771730	146992030	Founder_prob	Haplotype_probs
11.8309	7.36455	1.60647	F492	male_flowering_d6_SZEGED_2017_OPT_qDTA8	PZE-108085812	AX-91771730	146992030	Founder_prob	Haplotype_probs
-3.90194	8.08135	-0.482833	ND245	male_flowering_d6_SZEGED_2017_OPT_qDTA8	PZE-108085812	AX-91771730	146992030	Founder_prob	Haplotype_probs
10.6333	5.37301	1.97903	VA85	male_flowering_d6_SZEGED_2017_OPT_qDTA8	PZE-108085812	AX-91771730	146992030	Founder_prob	Haplotype_probs
11.3924	2.87181	3.96697	B73_inra	tkw_15_ALL_qTKW5	AX-90920941	AX-90602690	1723080	Founder_prob	600K_SNP
4.84935	2.01571	2.40577	A632_usa	tkw_15_ALL_qTKW5	AX-90920941	AX-90602690	1723080	Founder_prob	600K_SNP
-2.0467	3.27385	-0.625167	CO255_inra	tkw_15_ALL_qTKW5	AX-90920941	AX-90602690	1723080	Founder_prob	600K_SNP
-6.10263	4.12768	-1.47847	FV252_inra	tkw_15_ALL_qTKW5	AX-90920941	AX-90602690	1723080	Founder_prob	600K_SNP
-0.695674	3.26151	-0.213299	OH43_inra	tkw_15_ALL_qTKW5	AX-90920941	AX-90602690	1723080	Founder_prob	600K_SNP
-0.715346	3.19739	-0.223728	A654_inra	tkw_15_ALL_qTKW5	AX-90920941	AX-90602690	1723080	Founder_prob	600K_SNP
-1.69771	2.69165	-0.630733	FV2_inra	tkw_15_ALL_qTKW5	AX-90920941	AX-90602690	1723080	Founder_prob	600K_SNP
-4.1041	2.1178	-1.93791	C103_inra	tkw_15_ALL_qTKW5	AX-90920941	AX-90602690	1723080	Founder_prob	600K_SNP
-3.12832	2.64031	-1.18483	EP1_inra	tkw_15_ALL_qTKW5	AX-90920941	AX-90602690	1723080	Founder_prob	600K_SNP
-7.23405	3.18897	-2.26846	D105_inra	tkw_15_ALL_qTKW5	AX-90920941	AX-90602690	1723080	Founder_prob	600K_SNP
-0.601265	2.68762	-0.223717	W117_inra	tkw_15_ALL_qTKW5	AX-90920941	AX-90602690	1723080	Founder_prob	600K_SNP
1.81083	3.03582	0.596489	B96	tkw_15_ALL_qTKW5	AX-90920941	AX-90602690	1723080	Founder_prob	600K_SNP
4.66241	5.17482	0.90098	DK63	tkw_15_ALL_qTKW5	AX-90920941	AX-90602690	1723080	Founder_prob	600K_SNP
4.29138	2.14395	2.00162	F492	tkw_15_ALL_qTKW5	AX-90920941	AX-90602690	1723080	Founder_prob	600K_SNP
-2.02718	2.76524	-0.733091	ND245	tkw_15_ALL_qTKW5	AX-90920941	AX-90602690	1723080	Founder_prob	600K_SNP
-3.21867	3.02414	-1.06432	VA85	tkw_15_ALL_qTKW5	AX-90920941	AX-90602690	1723080	Founder_prob	600K_SNP
7.1618	3.02028	2.37124	B73_inra	tkw_15_BLOIS_2017_OPT_qTKW7_1	AX-91025554	AX-91714901	13512960	Founder_prob	600K_SNP
2.33122	5.65629	0.412146	A632_usa	tkw_15_BLOIS_2017_OPT_qTKW7_1	AX-91025554	AX-91714901	13512960	Founder_prob	600K_SNP
0.586177	3.3475	0.175109	CO255_inra	tkw_15_BLOIS_2017_OPT_qTKW7_1	AX-91025554	AX-91714901	13512960	Founder_prob	600K_SNP
0.390102	4.27058	0.0913462	FV252_inra	tkw_15_BLOIS_2017_OPT_qTKW7_1	AX-91025554	AX-91714901	13512960	Founder_prob	600K_SNP
2.77404	2.80581	0.988678	OH43_inra	tkw_15_BLOIS_2017_OPT_qTKW7_1	AX-91025554	AX-91714901	13512960	Founder_prob	600K_SNP
-9.47703	3.40735	-2.78135	A654_inra	tkw_15_BLOIS_2017_OPT_qTKW7_1	AX-91025554	AX-91714901	13512960	Founder_prob	600K_SNP
9.99653	3.22063	3.1039	FV2_inra	tkw_15_BLOIS_2017_OPT_qTKW7_1	AX-91025554	AX-91714901	13512960	Founder_prob	600K_SNP
-0.168099	3.87617	-0.0433672	C103_inra	tkw_15_BLOIS_2017_OPT_qTKW7_1	AX-91025554	AX-91714901	13512960	Founder_prob	600K_SNP
-3.86488	5.65043	-0.683997	EP1_inra	tkw_15_BLOIS_2017_OPT_qTKW7_1	AX-91025554	AX-91714901	13512960	Founder_prob	600K_SNP
-12.9405	4.56362	-2.83557	D105_inra	tkw_15_BLOIS_2017_OPT_qTKW7_1	AX-91025554	AX-91714901	13512960	Founder_prob	600K_SNP
-9.9666	3.48752	-2.85779	W117_inra	tkw_15_BLOIS_2017_OPT_qTKW7_1	AX-91025554	AX-91714901	13512960	Founder_prob	600K_SNP
7.07472	3.40734	2.07632	B96	tkw_15_BLOIS_2017_OPT_qTKW7_1	AX-91025554	AX-91714901	13512960	Founder_prob	600K_SNP
-6.68054	4.06419	-1.64376	DK63	tkw_15_BLOIS_2017_OPT_qTKW7_1	AX-91025554	AX-91714901	13512960	Founder_prob	600K_SNP
-9.07671	5.0539	-1.79598	F492	tkw_15_BLOIS_2017_OPT_qTKW7_1	AX-91025554	AX-91714901	13512960	Founder_prob	600K_SNP
3.75373	4.26968	0.879162	ND245	tkw_15_BLOIS_2017_OPT_qTKW7_1	AX-91025554	AX-91714901	13512960	Founder_prob	600K_SNP
1.45999	3.58	0.40782	VA85	tkw_15_BLOIS_2017_OPT_qTKW7_1	AX-91025554	AX-91714901	13512960	Founder_prob	600K_SNP
5.62298	2.93801	1.91387	B73_inra	tkw_15_BLOIS_2017_OPT_qTKW7_1	SYN16002	SYN16002	18112119	Founder_prob	Founder_probs
-18.8848	6.53	-2.892	A632_usa	tkw_15_BLOIS_2017_OPT_qTKW7_1	SYN16002	SYN16002	18112119	Founder_prob	Founder_probs
5.17532	3.43162	1.50813	CO255_inra	tkw_15_BLOIS_2017_OPT_qTKW7_1	SYN16002	SYN16002	18112119	Founder_prob	Founder_probs
-2.18689	3.81403	-0.573379	FV252_inra	tkw_15_BLOIS_2017_OPT_qTKW7_1	SYN16002	SYN16002	18112119	Founder_prob	Founder_probs
-0.993001	2.82441	-0.351578	OH43_inra	tkw_15_BLOIS_2017_OPT_qTKW7_1	SYN16002	SYN16002	18112119	Founder_prob	Founder_probs
-7.68366	3.70658	-2.07298	A654_inra	tkw_15_BLOIS_2017_OPT_qTKW7_1	SYN16002	SYN16002	18112119	Founder_prob	Founder_probs
10.9436	4.20286	2.60384	FV2_inra	tkw_15_BLOIS_2017_OPT_qTKW7_1	SYN16002	SYN16002	18112119	Founder_prob	Founder_probs
-3.36541	3.70658	-0.907957	C103_inra	tkw_15_BLOIS_2017_OPT_qTKW7_1	SYN16002	SYN16002	18112119	Founder_prob	Founder_probs
5.82206	5.94375	0.979526	EP1_inra	tkw_15_BLOIS_2017_OPT_qTKW7_1	SYN16002	SYN16002	18112119	Founder_prob	Founder_probs
-11.2861	4.06035	-2.77958	D105_inra	tkw_15_BLOIS_2017_OPT_qTKW7_1	SYN16002	SYN16002	18112119	Founder_prob	Founder_probs
-9.84991	3.60772	-2.73023	W117_inra	tkw_15_BLOIS_2017_OPT_qTKW7_1	SYN16002	SYN16002	18112119	Founder_prob	Founder_probs
9.38724	2.82443	3.32359	B96	tkw_15_BLOIS_2017_OPT_qTKW7_1	SYN16002	SYN16002	18112119	Founder_prob	Founder_probs
-6.47917	3.51637	-1.84257	DK63	tkw_15_BLOIS_2017_OPT_qTKW7_1	SYN16002	SYN16002	18112119	Founder_prob	Founder_probs
-2.91712	4.53962	-0.642593	F492	tkw_15_BLOIS_2017_OPT_qTKW7_1	SYN16002	SYN16002	18112119	Founder_prob	Founder_probs
8.64159	3.70662	2.33139	ND245	tkw_15_BLOIS_2017_OPT_qTKW7_1	SYN16002	SYN16002	18112119	Founder_prob	Founder_probs
-0.497021	3.60772	-0.137766	VA85	tkw_15_BLOIS_2017_OPT_qTKW7_1	SYN16002	SYN16002	18112119	Founder_prob	Founder_probs
7.1618	3.02028	2.37124	B73_inra	tkw_15_BLOIS_2017_OPT_qTKW7_1	AX-91201362	AX-91714901	12663253	Founder_prob	Haplotype_probs
2.33122	5.65629	0.412146	A632_usa	tkw_15_BLOIS_2017_OPT_qTKW7_1	AX-91201362	AX-91714901	12663253	Founder_prob	Haplotype_probs
0.586177	3.3475	0.175109	CO255_inra	tkw_15_BLOIS_2017_OPT_qTKW7_1	AX-91201362	AX-91714901	12663253	Founder_prob	Haplotype_probs
0.390102	4.27058	0.0913462	FV252_inra	tkw_15_BLOIS_2017_OPT_qTKW7_1	AX-91201362	AX-91714901	12663253	Founder_prob	Haplotype_probs
2.77404	2.80581	0.988678	OH43_inra	tkw_15_BLOIS_2017_OPT_qTKW7_1	AX-91201362	AX-91714901	12663253	Founder_prob	Haplotype_probs
-9.47703	3.40735	-2.78135	A654_inra	tkw_15_BLOIS_2017_OPT_qTKW7_1	AX-91201362	AX-91714901	12663253	Founder_prob	Haplotype_probs
9.99653	3.22063	3.1039	FV2_inra	tkw_15_BLOIS_2017_OPT_qTKW7_1	AX-91201362	AX-91714901	12663253	Founder_prob	Haplotype_probs
-0.168099	3.87617	-0.0433672	C103_inra	tkw_15_BLOIS_2017_OPT_qTKW7_1	AX-91201362	AX-91714901	12663253	Founder_prob	Haplotype_probs
-3.86488	5.65043	-0.683997	EP1_inra	tkw_15_BLOIS_2017_OPT_qTKW7_1	AX-91201362	AX-91714901	12663253	Founder_prob	Haplotype_probs
-12.9405	4.56362	-2.83557	D105_inra	tkw_15_BLOIS_2017_OPT_qTKW7_1	AX-91201362	AX-91714901	12663253	Founder_prob	Haplotype_probs
-9.9666	3.48752	-2.85779	W117_inra	tkw_15_BLOIS_2017_OPT_qTKW7_1	AX-91201362	AX-91714901	12663253	Founder_prob	Haplotype_probs
7.07472	3.40734	2.07632	B96	tkw_15_BLOIS_2017_OPT_qTKW7_1	AX-91201362	AX-91714901	12663253	Founder_prob	Haplotype_probs
-6.68054	4.06419	-1.64376	DK63	tkw_15_BLOIS_2017_OPT_qTKW7_1	AX-91201362	AX-91714901	12663253	Founder_prob	Haplotype_probs
-9.07671	5.0539	-1.79598	F492	tkw_15_BLOIS_2017_OPT_qTKW7_1	AX-91201362	AX-91714901	12663253	Founder_prob	Haplotype_probs
3.75373	4.26968	0.879162	ND245	tkw_15_BLOIS_2017_OPT_qTKW7_1	AX-91201362	AX-91714901	12663253	Founder_prob	Haplotype_probs
1.45999	3.58	0.40782	VA85	tkw_15_BLOIS_2017_OPT_qTKW7_1	AX-91201362	AX-91714901	12663253	Founder_prob	Haplotype_probs
9.81807	3.25649	3.01492	B73_inra	tkw_15_GRANEROS_2015_OPT_qTKW7_2	AX-91734623	AX-91052974	124756367	Founder_prob	600K_SNP
-9.10381	6.52922	-1.39432	A632_usa	tkw_15_GRANEROS_2015_OPT_qTKW7_2	AX-91734623	AX-91052974	124756367	Founder_prob	600K_SNP
-4.60753	4.7427	-0.971499	CO255_inra	tkw_15_GRANEROS_2015_OPT_qTKW7_2	AX-91734623	AX-91052974	124756367	Founder_prob	600K_SNP
-4.73062	4.51016	-1.04888	FV252_inra	tkw_15_GRANEROS_2015_OPT_qTKW7_2	AX-91734623	AX-91052974	124756367	Founder_prob	600K_SNP
-8.97057	5.18825	-1.72902	OH43_inra	tkw_15_GRANEROS_2015_OPT_qTKW7_2	AX-91734623	AX-91052974	124756367	Founder_prob	600K_SNP
-3.37673	4.85422	-0.695627	A654_inra	tkw_15_GRANEROS_2015_OPT_qTKW7_2	AX-91734623	AX-91052974	124756367	Founder_prob	600K_SNP
2.83165	4.88339	0.579852	FV2_inra	tkw_15_GRANEROS_2015_OPT_qTKW7_2	AX-91734623	AX-91052974	124756367	Founder_prob	600K_SNP
3.29752	5.9756	0.55183	C103_inra	tkw_15_GRANEROS_2015_OPT_qTKW7_2	AX-91734623	AX-91052974	124756367	Founder_prob	600K_SNP
-13.5606	5.35534	-2.53216	EP1_inra	tkw_15_GRANEROS_2015_OPT_qTKW7_2	AX-91734623	AX-91052974	124756367	Founder_prob	600K_SNP
-9.07124	4.12893	-2.197	D105_inra	tkw_15_GRANEROS_2015_OPT_qTKW7_2	AX-91734623	AX-91052974	124756367	Founder_prob	600K_SNP
-7.65637	4.74584	-1.61328	W117_inra	tkw_15_GRANEROS_2015_OPT_qTKW7_2	AX-91734623	AX-91052974	124756367	Founder_prob	600K_SNP
5.87448	3.49404	1.68128	B96	tkw_15_GRANEROS_2015_OPT_qTKW7_2	AX-91734623	AX-91052974	124756367	Founder_prob	600K_SNP
8.23696	4.91461	1.67602	DK63	tkw_15_GRANEROS_2015_OPT_qTKW7_2	AX-91734623	AX-91052974	124756367	Founder_prob	600K_SNP
-5.24845	6.22587	-0.843006	F492	tkw_15_GRANEROS_2015_OPT_qTKW7_2	AX-91734623	AX-91052974	124756367	Founder_prob	600K_SNP
11.1464	5.067	2.1998	ND245	tkw_15_GRANEROS_2015_OPT_qTKW7_2	AX-91734623	AX-91052974	124756367	Founder_prob	600K_SNP
7.96642	6.22557	1.27963	VA85	tkw_15_GRANEROS_2015_OPT_qTKW7_2	AX-91734623	AX-91052974	124756367	Founder_prob	600K_SNP
12.711	3.90426	3.25568	B73_inra	tkw_15_GRANEROS_2015_OPT_qTKW7_2	AX-91053569	AX-91053569	126231741	Founder_prob	Founder_probs
-4.5918	6.88579	-0.666851	A632_usa	tkw_15_GRANEROS_2015_OPT_qTKW7_2	AX-91053569	AX-91053569	126231741	Founder_prob	Founder_probs
-6.45982	5.17355	-1.24863	CO255_inra	tkw_15_GRANEROS_2015_OPT_qTKW7_2	AX-91053569	AX-91053569	126231741	Founder_prob	Founder_probs
-6.56413	5.36022	-1.2246	FV252_inra	tkw_15_GRANEROS_2015_OPT_qTKW7_2	AX-91053569	AX-91053569	126231741	Founder_prob	Founder_probs
-11.698	3.83881	-3.0473	OH43_inra	tkw_15_GRANEROS_2015_OPT_qTKW7_2	AX-91053569	AX-91053569	126231741	Founder_prob	Founder_probs
-4.38553	5.37412	-0.816046	A654_inra	tkw_15_GRANEROS_2015_OPT_qTKW7_2	AX-91053569	AX-91053569	126231741	Founder_prob	Founder_probs
5.824	6.24542	0.932523	FV2_inra	tkw_15_GRANEROS_2015_OPT_qTKW7_2	AX-91053569	AX-91053569	126231741	Founder_prob	Founder_probs
5.12412	5.74984	0.891176	C103_inra	tkw_15_GRANEROS_2015_OPT_qTKW7_2	AX-91053569	AX-91053569	126231741	Founder_prob	Founder_probs
-11.886	4.77166	-2.49096	EP1_inra	tkw_15_GRANEROS_2015_OPT_qTKW7_2	AX-91053569	AX-91053569	126231741	Founder_prob	Founder_probs
-8.99903	4.42045	-2.03578	D105_inra	tkw_15_GRANEROS_2015_OPT_qTKW7_2	AX-91053569	AX-91053569	126231741	Founder_prob	Founder_probs
0.136312	8.41639	0.016196	W117_inra	tkw_15_GRANEROS_2015_OPT_qTKW7_2	AX-91053569	AX-91053569	126231741	Founder_prob	Founder_probs
6.31227	3.50181	1.80257	B96	tkw_15_GRANEROS_2015_OPT_qTKW7_2	AX-91053569	AX-91053569	126231741	Founder_prob	Founder_probs
8.29724	6.60576	1.25606	DK63	tkw_15_GRANEROS_2015_OPT_qTKW7_2	AX-91053569	AX-91053569	126231741	Founder_prob	Founder_probs
-5.78273	5.80283	-0.996537	F492	tkw_15_GRANEROS_2015_OPT_qTKW7_2	AX-91053569	AX-91053569	126231741	Founder_prob	Founder_probs
12.2348	6.10409	2.00437	ND245	tkw_15_GRANEROS_2015_OPT_qTKW7_2	AX-91053569	AX-91053569	126231741	Founder_prob	Founder_probs
13.4126	6.25766	2.14339	VA85	tkw_15_GRANEROS_2015_OPT_qTKW7_2	AX-91053569	AX-91053569	126231741	Founder_prob	Founder_probs
5.63674	1.38643	4.06565	B73_inra	total_plant_height_ALL_qTPH7	PZB02215.4	AX-91024623	9548228	Founder_prob	600K_SNP
-0.220726	2.08654	-0.105786	A632_usa	total_plant_height_ALL_qTPH7	PZB02215.4	AX-91024623	9548228	Founder_prob	600K_SNP
-2.87692	1.92413	-1.49518	CO255_inra	total_plant_height_ALL_qTPH7	PZB02215.4	AX-91024623	9548228	Founder_prob	600K_SNP
4.22488	2.03417	2.07696	FV252_inra	total_plant_height_ALL_qTPH7	PZB02215.4	AX-91024623	9548228	Founder_prob	600K_SNP
-1.50671	1.26024	-1.19557	OH43_inra	total_plant_height_ALL_qTPH7	PZB02215.4	AX-91024623	9548228	Founder_prob	600K_SNP
-3.47532	1.50493	-2.30929	A654_inra	total_plant_height_ALL_qTPH7	PZB02215.4	AX-91024623	9548228	Founder_prob	600K_SNP
1.7671	1.39533	1.26643	FV2_inra	total_plant_height_ALL_qTPH7	PZB02215.4	AX-91024623	9548228	Founder_prob	600K_SNP
2.70098	1.63714	1.64982	C103_inra	total_plant_height_ALL_qTPH7	PZB02215.4	AX-91024623	9548228	Founder_prob	600K_SNP
-1.07915	2.18207	-0.494554	EP1_inra	total_plant_height_ALL_qTPH7	PZB02215.4	AX-91024623	9548228	Founder_prob	600K_SNP
-0.829579	2.00723	-0.413294	D105_inra	total_plant_height_ALL_qTPH7	PZB02215.4	AX-91024623	9548228	Founder_prob	600K_SNP
-4.55914	1.47334	-3.09443	W117_inra	total_plant_height_ALL_qTPH7	PZB02215.4	AX-91024623	9548228	Founder_prob	600K_SNP
3.17052	1.67313	1.89497	B96	total_plant_height_ALL_qTPH7	PZB02215.4	AX-91024623	9548228	Founder_prob	600K_SNP
-3.40758	1.52607	-2.23292	DK63	total_plant_height_ALL_qTPH7	PZB02215.4	AX-91024623	9548228	Founder_prob	600K_SNP
2.95209	1.82439	1.61812	F492	total_plant_height_ALL_qTPH7	PZB02215.4	AX-91024623	9548228	Founder_prob	600K_SNP
0.867529	1.80907	0.479544	ND245	total_plant_height_ALL_qTPH7	PZB02215.4	AX-91024623	9548228	Founder_prob	600K_SNP
-2.78343	1.79337	-1.55207	VA85	total_plant_height_ALL_qTPH7	PZB02215.4	AX-91024623	9548228	Founder_prob	600K_SNP
5.75683	1.40812	4.08832	B73_inra	total_plant_height_ALL_qTPH7	AX-91024553	AX-91024553	9361661	Founder_prob	Founder_probs
-0.947955	1.87904	-0.504489	A632_usa	total_plant_height_ALL_qTPH7	AX-91024553	AX-91024553	9361661	Founder_prob	Founder_probs
-2.33969	1.85183	-1.26344	CO255_inra	total_plant_height_ALL_qTPH7	AX-91024553	AX-91024553	9361661	Founder_prob	Founder_probs
2.86236	2.14566	1.33402	FV252_inra	total_plant_height_ALL_qTPH7	AX-91024553	AX-91024553	9361661	Founder_prob	Founder_probs
-0.915654	1.26487	-0.723909	OH43_inra	total_plant_height_ALL_qTPH7	AX-91024553	AX-91024553	9361661	Founder_prob	Founder_probs
-4.06413	1.56954	-2.58938	A654_inra	total_plant_height_ALL_qTPH7	AX-91024553	AX-91024553	9361661	Founder_prob	Founder_probs
1.54997	1.39118	1.11415	FV2_inra	total_plant_height_ALL_qTPH7	AX-91024553	AX-91024553	9361661	Founder_prob	Founder_probs
3.25154	1.64814	1.97286	C103_inra	total_plant_height_ALL_qTPH7	AX-91024553	AX-91024553	9361661	Founder_prob	Founder_probs
-0.309428	2.20183	-0.140532	EP1_inra	total_plant_height_ALL_qTPH7	AX-91024553	AX-91024553	9361661	Founder_prob	Founder_probs
0.100115	2.10826	0.0474871	D105_inra	total_plant_height_ALL_qTPH7	AX-91024553	AX-91024553	9361661	Founder_prob	Founder_probs
-4.67551	1.44117	-3.24425	W117_inra	total_plant_height_ALL_qTPH7	AX-91024553	AX-91024553	9361661	Founder_prob	Founder_probs
4.08666	1.71623	2.38119	B96	total_plant_height_ALL_qTPH7	AX-91024553	AX-91024553	9361661	Founder_prob	Founder_probs
-3.25601	1.43477	-2.26936	DK63	total_plant_height_ALL_qTPH7	AX-91024553	AX-91024553	9361661	Founder_prob	Founder_probs
2.45649	1.82364	1.34703	F492	total_plant_height_ALL_qTPH7	AX-91024553	AX-91024553	9361661	Founder_prob	Founder_probs
1.10356	1.86376	0.592114	ND245	total_plant_height_ALL_qTPH7	AX-91024553	AX-91024553	9361661	Founder_prob	Founder_probs
-3.52666	1.85092	-1.90535	VA85	total_plant_height_ALL_qTPH7	AX-91024553	AX-91024553	9361661	Founder_prob	Founder_probs
5.60889	1.44948	3.86958	B73_inra	total_plant_height_ALL_qTPH7	PZE-107012564	AX-91024576	9492287	Founder_prob	Haplotype_probs
-0.237461	2.04001	-0.116402	A632_usa	total_plant_height_ALL_qTPH7	PZE-107012564	AX-91024576	9492287	Founder_prob	Haplotype_probs
-2.32447	1.84772	-1.25802	CO255_inra	total_plant_height_ALL_qTPH7	PZE-107012564	AX-91024576	9492287	Founder_prob	Haplotype_probs
3.28801	2.04767	1.60574	FV252_inra	total_plant_height_ALL_qTPH7	PZE-107012564	AX-91024576	9492287	Founder_prob	Haplotype_probs
-1.47292	1.27036	-1.15945	OH43_inra	total_plant_height_ALL_qTPH7	PZE-107012564	AX-91024576	9492287	Founder_prob	Haplotype_probs
-3.697	1.523	-2.42745	A654_inra	total_plant_height_ALL_qTPH7	PZE-107012564	AX-91024576	9492287	Founder_prob	Haplotype_probs
1.61515	1.3897	1.16223	FV2_inra	total_plant_height_ALL_qTPH7	PZE-107012564	AX-91024576	9492287	Founder_prob	Haplotype_probs
3.30341	1.63193	2.02424	C103_inra	total_plant_height_ALL_qTPH7	PZE-107012564	AX-91024576	9492287	Founder_prob	Haplotype_probs
-1.05757	2.21292	-0.477906	EP1_inra	total_plant_height_ALL_qTPH7	PZE-107012564	AX-91024576	9492287	Founder_prob	Haplotype_probs
0.0162764	2.06345	0.00788797	D105_inra	total_plant_height_ALL_qTPH7	PZE-107012564	AX-91024576	9492287	Founder_prob	Haplotype_probs
-4.40446	1.45606	-3.02492	W117_inra	total_plant_height_ALL_qTPH7	PZE-107012564	AX-91024576	9492287	Founder_prob	Haplotype_probs
4.10811	1.71196	2.39965	B96	total_plant_height_ALL_qTPH7	PZE-107012564	AX-91024576	9492287	Founder_prob	Haplotype_probs
-3.24524	1.42567	-2.27629	DK63	total_plant_height_ALL_qTPH7	PZE-107012564	AX-91024576	9492287	Founder_prob	Haplotype_probs
3.03856	1.75917	1.72727	F492	total_plant_height_ALL_qTPH7	PZE-107012564	AX-91024576	9492287	Founder_prob	Haplotype_probs
1.04409	1.8088	0.57723	ND245	total_plant_height_ALL_qTPH7	PZE-107012564	AX-91024576	9492287	Founder_prob	Haplotype_probs
-4.01275	1.85853	-2.1591	VA85	total_plant_height_ALL_qTPH7	PZE-107012564	AX-91024576	9492287	Founder_prob	Haplotype_probs
5.80083	2.52262	2.29952	B73_inra	total_plant_height_BLOIS_2017_OPT_qTPH7	AX-91714501	AX-91417517	10085223	Founder_prob	600K_SNP
-3.73991	3.56538	-1.04895	A632_usa	total_plant_height_BLOIS_2017_OPT_qTPH7	AX-91714501	AX-91417517	10085223	Founder_prob	600K_SNP
-5.32172	2.97652	-1.7879	CO255_inra	total_plant_height_BLOIS_2017_OPT_qTPH7	AX-91714501	AX-91417517	10085223	Founder_prob	600K_SNP
3.36144	3.35981	1.00049	FV252_inra	total_plant_height_BLOIS_2017_OPT_qTPH7	AX-91714501	AX-91417517	10085223	Founder_prob	600K_SNP
-1.48987	1.92075	-0.77567	OH43_inra	total_plant_height_BLOIS_2017_OPT_qTPH7	AX-91714501	AX-91417517	10085223	Founder_prob	600K_SNP
-3.29023	2.62904	-1.25149	A654_inra	total_plant_height_BLOIS_2017_OPT_qTPH7	AX-91714501	AX-91417517	10085223	Founder_prob	600K_SNP
1.52713	2.4079	0.634216	FV2_inra	total_plant_height_BLOIS_2017_OPT_qTPH7	AX-91714501	AX-91417517	10085223	Founder_prob	600K_SNP
4.36042	2.34079	1.8628	C103_inra	total_plant_height_BLOIS_2017_OPT_qTPH7	AX-91714501	AX-91417517	10085223	Founder_prob	600K_SNP
-3.26952	3.75272	-0.871239	EP1_inra	total_plant_height_BLOIS_2017_OPT_qTPH7	AX-91714501	AX-91417517	10085223	Founder_prob	600K_SNP
-4.62232	3.3439	-1.38231	D105_inra	total_plant_height_BLOIS_2017_OPT_qTPH7	AX-91714501	AX-91417517	10085223	Founder_prob	600K_SNP
-7.21485	2.51326	-2.87071	W117_inra	total_plant_height_BLOIS_2017_OPT_qTPH7	AX-91714501	AX-91417517	10085223	Founder_prob	600K_SNP
6.5865	2.68681	2.45142	B96	total_plant_height_BLOIS_2017_OPT_qTPH7	AX-91714501	AX-91417517	10085223	Founder_prob	600K_SNP
-2.28694	2.5925	-0.882136	DK63	total_plant_height_BLOIS_2017_OPT_qTPH7	AX-91714501	AX-91417517	10085223	Founder_prob	600K_SNP
5.91759	3.26341	1.81331	F492	total_plant_height_BLOIS_2017_OPT_qTPH7	AX-91714501	AX-91417517	10085223	Founder_prob	600K_SNP
2.75626	3.33626	0.826151	ND245	total_plant_height_BLOIS_2017_OPT_qTPH7	AX-91714501	AX-91417517	10085223	Founder_prob	600K_SNP
-3.01084	3.43195	-0.877297	VA85	total_plant_height_BLOIS_2017_OPT_qTPH7	AX-91714501	AX-91417517	10085223	Founder_prob	600K_SNP
0.944552	3.43353	0.275096	B73_inra	total_plant_height_NERAC_2016_WD_qTPH3	AX-90594684	AX-91585314	172884804	Founder_prob	600K_SNP
4.86597	4.7209	1.03073	A632_usa	total_plant_height_NERAC_2016_WD_qTPH3	AX-90594684	AX-91585314	172884804	Founder_prob	600K_SNP
8.8617	3.65046	2.42756	CO255_inra	total_plant_height_NERAC_2016_WD_qTPH3	AX-90594684	AX-91585314	172884804	Founder_prob	600K_SNP
2.56835	3.43838	0.746966	FV252_inra	total_plant_height_NERAC_2016_WD_qTPH3	AX-90594684	AX-91585314	172884804	Founder_prob	600K_SNP
-1.60686	2.74256	-0.585899	OH43_inra	total_plant_height_NERAC_2016_WD_qTPH3	AX-90594684	AX-91585314	172884804	Founder_prob	600K_SNP
-2.1901	4.41786	-0.495737	A654_inra	total_plant_height_NERAC_2016_WD_qTPH3	AX-90594684	AX-91585314	172884804	Founder_prob	600K_SNP
0.564742	2.84852	0.198258	FV2_inra	total_plant_height_NERAC_2016_WD_qTPH3	AX-90594684	AX-91585314	172884804	Founder_prob	600K_SNP
-2.77295	2.82998	-0.979848	C103_inra	total_plant_height_NERAC_2016_WD_qTPH3	AX-90594684	AX-91585314	172884804	Founder_prob	600K_SNP
2.82201	2.93442	0.961692	EP1_inra	total_plant_height_NERAC_2016_WD_qTPH3	AX-90594684	AX-91585314	172884804	Founder_prob	600K_SNP
1.1638	2.76094	0.421522	D105_inra	total_plant_height_NERAC_2016_WD_qTPH3	AX-90594684	AX-91585314	172884804	Founder_prob	600K_SNP
2.58533	3.56287	0.72563	W117_inra	total_plant_height_NERAC_2016_WD_qTPH3	AX-90594684	AX-91585314	172884804	Founder_prob	600K_SNP
0.837029	2.44367	0.342529	B96	total_plant_height_NERAC_2016_WD_qTPH3	AX-90594684	AX-91585314	172884804	Founder_prob	600K_SNP
-15.701	2.87446	-5.46224	DK63	total_plant_height_NERAC_2016_WD_qTPH3	AX-90594684	AX-91585314	172884804	Founder_prob	600K_SNP
2.33518	2.88916	0.808255	F492	total_plant_height_NERAC_2016_WD_qTPH3	AX-90594684	AX-91585314	172884804	Founder_prob	600K_SNP
2.9911	2.35306	1.27115	ND245	total_plant_height_NERAC_2016_WD_qTPH3	AX-90594684	AX-91585314	172884804	Founder_prob	600K_SNP
-5.1151	3.80649	-1.34378	VA85	total_plant_height_NERAC_2016_WD_qTPH3	AX-90594684	AX-91585314	172884804	Founder_prob	600K_SNP

## Sheet: HaplotypeEffectSizes
EffectSize	SE	T-value	Haplotype	QTL_ID	PeakSNP	KeptSNP	Position	Method	HaplotypeNumber	FocalMethod
-1.37731	3.38623	-0.406738	HAPGRP_1	female_flowering_d6_ALL_qDTS3_2	AX-91383809	AX-90834177	157563421	Haplotype_probs	15	600K_SNP
-3.80584	7.53006	-0.50542	HAPGRP_2	female_flowering_d6_ALL_qDTS3_2	AX-91383809	AX-90834177	157563421	Haplotype_probs	15	600K_SNP
-11.8149	5.258	-2.24703	HAPGRP_3	female_flowering_d6_ALL_qDTS3_2	AX-91383809	AX-90834177	157563421	Haplotype_probs	15	600K_SNP
-15.4506	5.91348	-2.61278	HAPGRP_4	female_flowering_d6_ALL_qDTS3_2	AX-91383809	AX-90834177	157563421	Haplotype_probs	15	600K_SNP
10.8935	3.69328	2.94955	HAPGRP_5	female_flowering_d6_ALL_qDTS3_2	AX-91383809	AX-90834177	157563421	Haplotype_probs	15	600K_SNP
-8.44235	5.86652	-1.43907	HAPGRP_6	female_flowering_d6_ALL_qDTS3_2	AX-91383809	AX-90834177	157563421	Haplotype_probs	15	600K_SNP
-4.2009	4.03064	-1.04224	HAPGRP_7	female_flowering_d6_ALL_qDTS3_2	AX-91383809	AX-90834177	157563421	Haplotype_probs	15	600K_SNP
-2.53342	4.16966	-0.607583	HAPGRP_8	female_flowering_d6_ALL_qDTS3_2	AX-91383809	AX-90834177	157563421	Haplotype_probs	15	600K_SNP
-13.5847	4.59178	-2.95848	HAPGRP_9	female_flowering_d6_ALL_qDTS3_2	AX-91383809	AX-90834177	157563421	Haplotype_probs	15	600K_SNP
-0.732325	5.92112	-0.12368	HAPGRP_10	female_flowering_d6_ALL_qDTS3_2	AX-91383809	AX-90834177	157563421	Haplotype_probs	15	600K_SNP
6.18593	6.28096	0.984871	HAPGRP_11	female_flowering_d6_ALL_qDTS3_2	AX-91383809	AX-90834177	157563421	Haplotype_probs	15	600K_SNP
23.3007	4.22857	5.51032	HAPGRP_12	female_flowering_d6_ALL_qDTS3_2	AX-91383809	AX-90834177	157563421	Haplotype_probs	15	600K_SNP
1.01111	3.72714	0.271283	HAPGRP_13	female_flowering_d6_ALL_qDTS3_2	AX-91383809	AX-90834177	157563421	Haplotype_probs	15	600K_SNP
5.24873	4.1012	1.2798	HAPGRP_14	female_flowering_d6_ALL_qDTS3_2	AX-91383809	AX-90834177	157563421	Haplotype_probs	15	600K_SNP
-6.02185	4.77355	-1.2615	HAPGRP_15	female_flowering_d6_ALL_qDTS3_2	AX-91383809	AX-90834177	157563421	Haplotype_probs	15	600K_SNP
12.444	2.96927	4.19091	HAPGRP_1	female_flowering_d6_ALL_qDTS8	AX-91100991	AX-91100867	128360284	Haplotype_probs	15	600K_SNP
3.86836	5.51181	0.701831	HAPGRP_2	female_flowering_d6_ALL_qDTS8	AX-91100991	AX-91100867	128360284	Haplotype_probs	15	600K_SNP
-2.40273	3.72919	-0.644304	HAPGRP_3	female_flowering_d6_ALL_qDTS8	AX-91100991	AX-91100867	128360284	Haplotype_probs	15	600K_SNP
10.5232	4.40157	2.39077	HAPGRP_4	female_flowering_d6_ALL_qDTS8	AX-91100991	AX-91100867	128360284	Haplotype_probs	15	600K_SNP
-8.30678	3.56753	-2.32844	HAPGRP_5	female_flowering_d6_ALL_qDTS8	AX-91100991	AX-91100867	128360284	Haplotype_probs	15	600K_SNP
-2.20521	4.04408	-0.545292	HAPGRP_6	female_flowering_d6_ALL_qDTS8	AX-91100991	AX-91100867	128360284	Haplotype_probs	15	600K_SNP
1.1415	5.65511	0.201853	HAPGRP_7	female_flowering_d6_ALL_qDTS8	AX-91100991	AX-91100867	128360284	Haplotype_probs	15	600K_SNP
-15.3886	5.17184	-2.97546	HAPGRP_8	female_flowering_d6_ALL_qDTS8	AX-91100991	AX-91100867	128360284	Haplotype_probs	15	600K_SNP
-9.65929	3.84441	-2.51255	HAPGRP_9	female_flowering_d6_ALL_qDTS8	AX-91100991	AX-91100867	128360284	Haplotype_probs	15	600K_SNP
-3.35428	4.49079	-0.746924	HAPGRP_10	female_flowering_d6_ALL_qDTS8	AX-91100991	AX-91100867	128360284	Haplotype_probs	15	600K_SNP
18.6874	6.1306	3.04822	HAPGRP_11	female_flowering_d6_ALL_qDTS8	AX-91100991	AX-91100867	128360284	Haplotype_probs	15	600K_SNP
-13.9146	4.84427	-2.87238	HAPGRP_12	female_flowering_d6_ALL_qDTS8	AX-91100991	AX-91100867	128360284	Haplotype_probs	15	600K_SNP
7.70491	6.46383	1.192	HAPGRP_13	female_flowering_d6_ALL_qDTS8	AX-91100991	AX-91100867	128360284	Haplotype_probs	15	600K_SNP
-11.9958	5.33546	-2.24832	HAPGRP_14	female_flowering_d6_ALL_qDTS8	AX-91100991	AX-91100867	128360284	Haplotype_probs	15	600K_SNP
16.1376	5.37908	3.00008	HAPGRP_15	female_flowering_d6_ALL_qDTS8	AX-91100991	AX-91100867	128360284	Haplotype_probs	15	600K_SNP
3.95753	5.32539	0.743143	HAPGRP_1	female_flowering_d6_ALL_qDTS3_2	AX-90834914	AX-90834914	160426458	Haplotype_probs	13	Founder_probs
1.55987	6.37566	0.24466	HAPGRP_2	female_flowering_d6_ALL_qDTS3_2	AX-90834914	AX-90834914	160426458	Haplotype_probs	13	Founder_probs
-18.2257	3.41171	-5.3421	HAPGRP_3	female_flowering_d6_ALL_qDTS3_2	AX-90834914	AX-90834914	160426458	Haplotype_probs	13	Founder_probs
-21.0364	5.80412	-3.62439	HAPGRP_4	female_flowering_d6_ALL_qDTS3_2	AX-90834914	AX-90834914	160426458	Haplotype_probs	13	Founder_probs
13.9838	3.79468	3.6851	HAPGRP_5	female_flowering_d6_ALL_qDTS3_2	AX-90834914	AX-90834914	160426458	Haplotype_probs	13	Founder_probs
-7.61073	5.89314	-1.29146	HAPGRP_6	female_flowering_d6_ALL_qDTS3_2	AX-90834914	AX-90834914	160426458	Haplotype_probs	13	Founder_probs
-5.14271	4.56799	-1.12581	HAPGRP_7	female_flowering_d6_ALL_qDTS3_2	AX-90834914	AX-90834914	160426458	Haplotype_probs	13	Founder_probs
0.498458	3.35704	0.148481	HAPGRP_8	female_flowering_d6_ALL_qDTS3_2	AX-90834914	AX-90834914	160426458	Haplotype_probs	13	Founder_probs
6.19299	6.24044	0.992397	HAPGRP_9	female_flowering_d6_ALL_qDTS3_2	AX-90834914	AX-90834914	160426458	Haplotype_probs	13	Founder_probs
17.8838	3.70504	4.82688	HAPGRP_10	female_flowering_d6_ALL_qDTS3_2	AX-90834914	AX-90834914	160426458	Haplotype_probs	13	Founder_probs
0.412607	2.74447	0.150341	HAPGRP_11	female_flowering_d6_ALL_qDTS3_2	AX-90834914	AX-90834914	160426458	Haplotype_probs	13	Founder_probs
1.75664	4.19725	0.418521	HAPGRP_12	female_flowering_d6_ALL_qDTS3_2	AX-90834914	AX-90834914	160426458	Haplotype_probs	13	Founder_probs
-3.79505	4.67926	-0.811036	HAPGRP_13	female_flowering_d6_ALL_qDTS3_2	AX-90834914	AX-90834914	160426458	Haplotype_probs	13	Founder_probs
13.531	2.95509	4.57887	HAPGRP_1	female_flowering_d6_ALL_qDTS8	PZA01038.1	PZA01038.1	128420026	Haplotype_probs	15	Founder_probs
4.49145	5.45715	0.823038	HAPGRP_2	female_flowering_d6_ALL_qDTS8	PZA01038.1	PZA01038.1	128420026	Haplotype_probs	15	Founder_probs
-3.92708	3.53412	-1.11119	HAPGRP_3	female_flowering_d6_ALL_qDTS8	PZA01038.1	PZA01038.1	128420026	Haplotype_probs	15	Founder_probs
10.5241	4.35753	2.41515	HAPGRP_4	female_flowering_d6_ALL_qDTS8	PZA01038.1	PZA01038.1	128420026	Haplotype_probs	15	Founder_probs
-8.82003	3.73724	-2.36004	HAPGRP_5	female_flowering_d6_ALL_qDTS8	PZA01038.1	PZA01038.1	128420026	Haplotype_probs	15	Founder_probs
-2.63811	3.89026	-0.678132	HAPGRP_6	female_flowering_d6_ALL_qDTS8	PZA01038.1	PZA01038.1	128420026	Haplotype_probs	15	Founder_probs
-0.416207	5.40736	-0.0769705	HAPGRP_7	female_flowering_d6_ALL_qDTS8	PZA01038.1	PZA01038.1	128420026	Haplotype_probs	15	Founder_probs
-15.9147	5.26704	-3.02156	HAPGRP_8	female_flowering_d6_ALL_qDTS8	PZA01038.1	PZA01038.1	128420026	Haplotype_probs	15	Founder_probs
-9.91648	3.71669	-2.6681	HAPGRP_9	female_flowering_d6_ALL_qDTS8	PZA01038.1	PZA01038.1	128420026	Haplotype_probs	15	Founder_probs
-4.7104	4.47633	-1.05229	HAPGRP_10	female_flowering_d6_ALL_qDTS8	PZA01038.1	PZA01038.1	128420026	Haplotype_probs	15	Founder_probs
18.3327	6.07163	3.01941	HAPGRP_11	female_flowering_d6_ALL_qDTS8	PZA01038.1	PZA01038.1	128420026	Haplotype_probs	15	Founder_probs
-14.0657	4.79759	-2.93183	HAPGRP_12	female_flowering_d6_ALL_qDTS8	PZA01038.1	PZA01038.1	128420026	Haplotype_probs	15	Founder_probs
10.4923	6.59575	1.59077	HAPGRP_13	female_flowering_d6_ALL_qDTS8	PZA01038.1	PZA01038.1	128420026	Haplotype_probs	15	Founder_probs
-10.146	5.42205	-1.87125	HAPGRP_14	female_flowering_d6_ALL_qDTS8	PZA01038.1	PZA01038.1	128420026	Haplotype_probs	15	Founder_probs
17.9041	5.53401	3.23529	HAPGRP_15	female_flowering_d6_ALL_qDTS8	PZA01038.1	PZA01038.1	128420026	Haplotype_probs	15	Founder_probs
2.48159	1.80458	1.37517	HAPGRP_1	female_flowering_d6_ALL_qDTS9	AX-91146185	AX-91146185	119413544	Haplotype_probs	10	Founder_probs
-18.8984	5.54062	-3.41088	HAPGRP_2	female_flowering_d6_ALL_qDTS9	AX-91146185	AX-91146185	119413544	Haplotype_probs	10	Founder_probs
-4.07371	3.08122	-1.32211	HAPGRP_3	female_flowering_d6_ALL_qDTS9	AX-91146185	AX-91146185	119413544	Haplotype_probs	10	Founder_probs
-6.80347	3.07092	-2.21545	HAPGRP_4	female_flowering_d6_ALL_qDTS9	AX-91146185	AX-91146185	119413544	Haplotype_probs	10	Founder_probs
-0.427215	6.68763	-0.0638814	HAPGRP_5	female_flowering_d6_ALL_qDTS9	AX-91146185	AX-91146185	119413544	Haplotype_probs	10	Founder_probs
2.5092	4.92663	0.509313	HAPGRP_6	female_flowering_d6_ALL_qDTS9	AX-91146185	AX-91146185	119413544	Haplotype_probs	10	Founder_probs
4.40157	3.81502	1.15375	HAPGRP_7	female_flowering_d6_ALL_qDTS9	AX-91146185	AX-91146185	119413544	Haplotype_probs	10	Founder_probs
20.4984	5.1628	3.9704	HAPGRP_8	female_flowering_d6_ALL_qDTS9	AX-91146185	AX-91146185	119413544	Haplotype_probs	10	Founder_probs
-7.37179	4.88929	-1.50774	HAPGRP_9	female_flowering_d6_ALL_qDTS9	AX-91146185	AX-91146185	119413544	Haplotype_probs	10	Founder_probs
5.73169	4.87212	1.17643	HAPGRP_10	female_flowering_d6_ALL_qDTS9	AX-91146185	AX-91146185	119413544	Haplotype_probs	10	Founder_probs
3.95753	5.32539	0.743143	HAPGRP_1	female_flowering_d6_ALL_qDTS3_2	AX-90834914	AX-90834914	160426458	Haplotype_probs	13	Haplotype_probs
1.55987	6.37566	0.24466	HAPGRP_2	female_flowering_d6_ALL_qDTS3_2	AX-90834914	AX-90834914	160426458	Haplotype_probs	13	Haplotype_probs
-18.2257	3.41171	-5.3421	HAPGRP_3	female_flowering_d6_ALL_qDTS3_2	AX-90834914	AX-90834914	160426458	Haplotype_probs	13	Haplotype_probs
-21.0364	5.80412	-3.62439	HAPGRP_4	female_flowering_d6_ALL_qDTS3_2	AX-90834914	AX-90834914	160426458	Haplotype_probs	13	Haplotype_probs
13.9838	3.79468	3.6851	HAPGRP_5	female_flowering_d6_ALL_qDTS3_2	AX-90834914	AX-90834914	160426458	Haplotype_probs	13	Haplotype_probs
-7.61073	5.89314	-1.29146	HAPGRP_6	female_flowering_d6_ALL_qDTS3_2	AX-90834914	AX-90834914	160426458	Haplotype_probs	13	Haplotype_probs
-5.14271	4.56799	-1.12581	HAPGRP_7	female_flowering_d6_ALL_qDTS3_2	AX-90834914	AX-90834914	160426458	Haplotype_probs	13	Haplotype_probs
0.498458	3.35704	0.148481	HAPGRP_8	female_flowering_d6_ALL_qDTS3_2	AX-90834914	AX-90834914	160426458	Haplotype_probs	13	Haplotype_probs
6.19299	6.24044	0.992397	HAPGRP_9	female_flowering_d6_ALL_qDTS3_2	AX-90834914	AX-90834914	160426458	Haplotype_probs	13	Haplotype_probs
17.8838	3.70504	4.82688	HAPGRP_10	female_flowering_d6_ALL_qDTS3_2	AX-90834914	AX-90834914	160426458	Haplotype_probs	13	Haplotype_probs
0.412607	2.74447	0.150341	HAPGRP_11	female_flowering_d6_ALL_qDTS3_2	AX-90834914	AX-90834914	160426458	Haplotype_probs	13	Haplotype_probs
1.75664	4.19725	0.418521	HAPGRP_12	female_flowering_d6_ALL_qDTS3_2	AX-90834914	AX-90834914	160426458	Haplotype_probs	13	Haplotype_probs
-3.79505	4.67926	-0.811036	HAPGRP_13	female_flowering_d6_ALL_qDTS3_2	AX-90834914	AX-90834914	160426458	Haplotype_probs	13	Haplotype_probs
13.3813	2.97976	4.49074	HAPGRP_1	female_flowering_d6_ALL_qDTS8	AX-91101099	AX-91101099	128743539	Haplotype_probs	13	Haplotype_probs
5.00267	5.44511	0.918745	HAPGRP_2	female_flowering_d6_ALL_qDTS8	AX-91101099	AX-91101099	128743539	Haplotype_probs	13	Haplotype_probs
-6.09971	2.44973	-2.48996	HAPGRP_3	female_flowering_d6_ALL_qDTS8	AX-91101099	AX-91101099	128743539	Haplotype_probs	13	Haplotype_probs
10.2966	4.34556	2.36946	HAPGRP_4	female_flowering_d6_ALL_qDTS8	AX-91101099	AX-91101099	128743539	Haplotype_probs	13	Haplotype_probs
-4.81583	3.05233	-1.57776	HAPGRP_5	female_flowering_d6_ALL_qDTS8	AX-91101099	AX-91101099	128743539	Haplotype_probs	13	Haplotype_probs
0.333775	5.16668	0.0646015	HAPGRP_6	female_flowering_d6_ALL_qDTS8	AX-91101099	AX-91101099	128743539	Haplotype_probs	13	Haplotype_probs
-17.1729	5.1051	-3.36388	HAPGRP_7	female_flowering_d6_ALL_qDTS8	AX-91101099	AX-91101099	128743539	Haplotype_probs	13	Haplotype_probs
-9.69708	3.71364	-2.61121	HAPGRP_8	female_flowering_d6_ALL_qDTS8	AX-91101099	AX-91101099	128743539	Haplotype_probs	13	Haplotype_probs
-4.95115	4.46765	-1.10822	HAPGRP_9	female_flowering_d6_ALL_qDTS8	AX-91101099	AX-91101099	128743539	Haplotype_probs	13	Haplotype_probs
18.3723	6.06234	3.03056	HAPGRP_10	female_flowering_d6_ALL_qDTS8	AX-91101099	AX-91101099	128743539	Haplotype_probs	13	Haplotype_probs
-13.8568	4.78603	-2.89526	HAPGRP_11	female_flowering_d6_ALL_qDTS8	AX-91101099	AX-91101099	128743539	Haplotype_probs	13	Haplotype_probs
10.6512	6.74575	1.57895	HAPGRP_12	female_flowering_d6_ALL_qDTS8	AX-91101099	AX-91101099	128743539	Haplotype_probs	13	Haplotype_probs
18.2253	5.52938	3.29609	HAPGRP_13	female_flowering_d6_ALL_qDTS8	AX-91101099	AX-91101099	128743539	Haplotype_probs	13	Haplotype_probs
6.2991	5.10349	1.23427	HAPGRP_1	female_flowering_d6_ALL_qDTS9	AX-91146091	AX-91146091	118776019	Haplotype_probs	15	Haplotype_probs
-13.1466	5.18607	-2.53498	HAPGRP_2	female_flowering_d6_ALL_qDTS9	AX-91146091	AX-91146091	118776019	Haplotype_probs	15	Haplotype_probs
-8.40487	3.75516	-2.23822	HAPGRP_3	female_flowering_d6_ALL_qDTS9	AX-91146091	AX-91146091	118776019	Haplotype_probs	15	Haplotype_probs
-6.76954	4.61728	-1.46613	HAPGRP_4	female_flowering_d6_ALL_qDTS9	AX-91146091	AX-91146091	118776019	Haplotype_probs	15	Haplotype_probs
-0.260313	4.60402	-0.0565404	HAPGRP_5	female_flowering_d6_ALL_qDTS9	AX-91146091	AX-91146091	118776019	Haplotype_probs	15	Haplotype_probs
-0.847524	2.94637	-0.28765	HAPGRP_6	female_flowering_d6_ALL_qDTS9	AX-91146091	AX-91146091	118776019	Haplotype_probs	15	Haplotype_probs
7.08455	5.02516	1.40982	HAPGRP_7	female_flowering_d6_ALL_qDTS9	AX-91146091	AX-91146091	118776019	Haplotype_probs	15	Haplotype_probs
-4.51012	5.98926	-0.753035	HAPGRP_8	female_flowering_d6_ALL_qDTS9	AX-91146091	AX-91146091	118776019	Haplotype_probs	15	Haplotype_probs
4.80774	4.44372	1.08192	HAPGRP_9	female_flowering_d6_ALL_qDTS9	AX-91146091	AX-91146091	118776019	Haplotype_probs	15	Haplotype_probs
2.9023	3.86065	0.751765	HAPGRP_10	female_flowering_d6_ALL_qDTS9	AX-91146091	AX-91146091	118776019	Haplotype_probs	15	Haplotype_probs
12.253	4.10724	2.98326	HAPGRP_11	female_flowering_d6_ALL_qDTS9	AX-91146091	AX-91146091	118776019	Haplotype_probs	15	Haplotype_probs
21.507	5.26581	4.08427	HAPGRP_12	female_flowering_d6_ALL_qDTS9	AX-91146091	AX-91146091	118776019	Haplotype_probs	15	Haplotype_probs
-8.3033	4.74766	-1.74892	HAPGRP_13	female_flowering_d6_ALL_qDTS9	AX-91146091	AX-91146091	118776019	Haplotype_probs	15	Haplotype_probs
5.27092	4.9717	1.06018	HAPGRP_14	female_flowering_d6_ALL_qDTS9	AX-91146091	AX-91146091	118776019	Haplotype_probs	15	Haplotype_probs
-12.8741	4.23128	-3.04262	HAPGRP_15	female_flowering_d6_ALL_qDTS9	AX-91146091	AX-91146091	118776019	Haplotype_probs	15	Haplotype_probs
10.4245	2.63411	3.95751	HAPGRP_1	female_flowering_d6_BLOIS_2014_OPT_qDTS3_2	AX-90590040	AX-90834938	160559346	Haplotype_probs	11	600K_SNP
-5.74127	6.99005	-0.82135	HAPGRP_2	female_flowering_d6_BLOIS_2014_OPT_qDTS3_2	AX-90590040	AX-90834938	160559346	Haplotype_probs	11	600K_SNP
-18.6748	3.79224	-4.92448	HAPGRP_3	female_flowering_d6_BLOIS_2014_OPT_qDTS3_2	AX-90590040	AX-90834938	160559346	Haplotype_probs	11	600K_SNP
-26.5792	6.34762	-4.18726	HAPGRP_4	female_flowering_d6_BLOIS_2014_OPT_qDTS3_2	AX-90590040	AX-90834938	160559346	Haplotype_probs	11	600K_SNP
15.1994	4.35126	3.4931	HAPGRP_5	female_flowering_d6_BLOIS_2014_OPT_qDTS3_2	AX-90590040	AX-90834938	160559346	Haplotype_probs	11	600K_SNP
-5.45275	6.46731	-0.843125	HAPGRP_6	female_flowering_d6_BLOIS_2014_OPT_qDTS3_2	AX-90590040	AX-90834938	160559346	Haplotype_probs	11	600K_SNP
-10.1748	5.27331	-1.92949	HAPGRP_7	female_flowering_d6_BLOIS_2014_OPT_qDTS3_2	AX-90590040	AX-90834938	160559346	Haplotype_probs	11	600K_SNP
2.2676	3.72085	0.609429	HAPGRP_8	female_flowering_d6_BLOIS_2014_OPT_qDTS3_2	AX-90590040	AX-90834938	160559346	Haplotype_probs	11	600K_SNP
1.56299	6.92462	0.225714	HAPGRP_9	female_flowering_d6_BLOIS_2014_OPT_qDTS3_2	AX-90590040	AX-90834938	160559346	Haplotype_probs	11	600K_SNP
0.191924	3.11699	0.0615737	HAPGRP_10	female_flowering_d6_BLOIS_2014_OPT_qDTS3_2	AX-90590040	AX-90834938	160559346	Haplotype_probs	11	600K_SNP
3.55301	5.20764	0.682269	HAPGRP_11	female_flowering_d6_BLOIS_2014_OPT_qDTS3_2	AX-90590040	AX-90834938	160559346	Haplotype_probs	11	600K_SNP
18.8236	3.41052	5.51928	HAPGRP_1	female_flowering_d6_BLOIS_2014_OPT_qDTS8	AX-91100974	AX-91100867	128360587	Haplotype_probs	15	600K_SNP
2.10887	6.36766	0.331185	HAPGRP_2	female_flowering_d6_BLOIS_2014_OPT_qDTS8	AX-91100974	AX-91100867	128360587	Haplotype_probs	15	600K_SNP
-4.23112	4.20434	-1.00637	HAPGRP_3	female_flowering_d6_BLOIS_2014_OPT_qDTS8	AX-91100974	AX-91100867	128360587	Haplotype_probs	15	600K_SNP
6.32686	4.88614	1.29486	HAPGRP_4	female_flowering_d6_BLOIS_2014_OPT_qDTS8	AX-91100974	AX-91100867	128360587	Haplotype_probs	15	600K_SNP
-7.19395	4.00889	-1.7945	HAPGRP_5	female_flowering_d6_BLOIS_2014_OPT_qDTS8	AX-91100974	AX-91100867	128360587	Haplotype_probs	15	600K_SNP
-4.56407	4.68247	-0.974715	HAPGRP_6	female_flowering_d6_BLOIS_2014_OPT_qDTS8	AX-91100974	AX-91100867	128360587	Haplotype_probs	15	600K_SNP
2.42954	6.46718	0.375672	HAPGRP_7	female_flowering_d6_BLOIS_2014_OPT_qDTS8	AX-91100974	AX-91100867	128360587	Haplotype_probs	15	600K_SNP
-16.6208	5.90819	-2.81318	HAPGRP_8	female_flowering_d6_BLOIS_2014_OPT_qDTS8	AX-91100974	AX-91100867	128360587	Haplotype_probs	15	600K_SNP
-15.4256	4.48168	-3.44192	HAPGRP_9	female_flowering_d6_BLOIS_2014_OPT_qDTS8	AX-91100974	AX-91100867	128360587	Haplotype_probs	15	600K_SNP
1.52434	5.11769	0.297857	HAPGRP_10	female_flowering_d6_BLOIS_2014_OPT_qDTS8	AX-91100974	AX-91100867	128360587	Haplotype_probs	15	600K_SNP
12.7145	7.00218	1.81579	HAPGRP_11	female_flowering_d6_BLOIS_2014_OPT_qDTS8	AX-91100974	AX-91100867	128360587	Haplotype_probs	15	600K_SNP
-8.13439	5.38037	-1.51186	HAPGRP_12	female_flowering_d6_BLOIS_2014_OPT_qDTS8	AX-91100974	AX-91100867	128360587	Haplotype_probs	15	600K_SNP
7.68388	7.1693	1.07178	HAPGRP_13	female_flowering_d6_BLOIS_2014_OPT_qDTS8	AX-91100974	AX-91100867	128360587	Haplotype_probs	15	600K_SNP
-14.5078	6.07178	-2.38938	HAPGRP_14	female_flowering_d6_BLOIS_2014_OPT_qDTS8	AX-91100974	AX-91100867	128360587	Haplotype_probs	15	600K_SNP
14.2767	5.96902	2.3918	HAPGRP_15	female_flowering_d6_BLOIS_2014_OPT_qDTS8	AX-91100974	AX-91100867	128360587	Haplotype_probs	15	600K_SNP
3.71652	5.90897	0.628962	HAPGRP_1	female_flowering_d6_BLOIS_2014_OPT_qDTS3_2	AX-90834914	AX-90834914	160426458	Haplotype_probs	13	Founder_probs
-5.57621	6.84105	-0.81511	HAPGRP_2	female_flowering_d6_BLOIS_2014_OPT_qDTS3_2	AX-90834914	AX-90834914	160426458	Haplotype_probs	13	Founder_probs
-18.8082	3.70256	-5.07978	HAPGRP_3	female_flowering_d6_BLOIS_2014_OPT_qDTS3_2	AX-90834914	AX-90834914	160426458	Haplotype_probs	13	Founder_probs
-27.1009	6.21085	-4.36348	HAPGRP_4	female_flowering_d6_BLOIS_2014_OPT_qDTS3_2	AX-90834914	AX-90834914	160426458	Haplotype_probs	13	Founder_probs
15.4292	4.24766	3.63239	HAPGRP_5	female_flowering_d6_BLOIS_2014_OPT_qDTS3_2	AX-90834914	AX-90834914	160426458	Haplotype_probs	13	Founder_probs
-5.48407	6.332	-0.866088	HAPGRP_6	female_flowering_d6_BLOIS_2014_OPT_qDTS3_2	AX-90834914	AX-90834914	160426458	Haplotype_probs	13	Founder_probs
-10.6868	5.17195	-2.0663	HAPGRP_7	female_flowering_d6_BLOIS_2014_OPT_qDTS3_2	AX-90834914	AX-90834914	160426458	Haplotype_probs	13	Founder_probs
2.58962	3.64268	0.71091	HAPGRP_8	female_flowering_d6_BLOIS_2014_OPT_qDTS3_2	AX-90834914	AX-90834914	160426458	Haplotype_probs	13	Founder_probs
2.10248	6.71627	0.313043	HAPGRP_9	female_flowering_d6_BLOIS_2014_OPT_qDTS3_2	AX-90834914	AX-90834914	160426458	Haplotype_probs	13	Founder_probs
21.0244	4.08758	5.14347	HAPGRP_10	female_flowering_d6_BLOIS_2014_OPT_qDTS3_2	AX-90834914	AX-90834914	160426458	Haplotype_probs	13	Founder_probs
0.319382	3.04178	0.104999	HAPGRP_11	female_flowering_d6_BLOIS_2014_OPT_qDTS3_2	AX-90834914	AX-90834914	160426458	Haplotype_probs	13	Founder_probs
2.285	4.50156	0.507602	HAPGRP_12	female_flowering_d6_BLOIS_2014_OPT_qDTS3_2	AX-90834914	AX-90834914	160426458	Haplotype_probs	13	Founder_probs
3.48878	5.08881	0.685578	HAPGRP_13	female_flowering_d6_BLOIS_2014_OPT_qDTS3_2	AX-90834914	AX-90834914	160426458	Haplotype_probs	13	Founder_probs
20.2738	3.39018	5.98016	HAPGRP_1	female_flowering_d6_BLOIS_2014_OPT_qDTS8	PZA01038.1	PZA01038.1	128420026	Haplotype_probs	15	Founder_probs
2.5388	6.23907	0.40692	HAPGRP_2	female_flowering_d6_BLOIS_2014_OPT_qDTS8	PZA01038.1	PZA01038.1	128420026	Haplotype_probs	15	Founder_probs
-6.11171	3.94126	-1.5507	HAPGRP_3	female_flowering_d6_BLOIS_2014_OPT_qDTS8	PZA01038.1	PZA01038.1	128420026	Haplotype_probs	15	Founder_probs
6.35901	4.77315	1.33225	HAPGRP_4	female_flowering_d6_BLOIS_2014_OPT_qDTS8	PZA01038.1	PZA01038.1	128420026	Haplotype_probs	15	Founder_probs
-6.65471	4.16121	-1.59923	HAPGRP_5	female_flowering_d6_BLOIS_2014_OPT_qDTS8	PZA01038.1	PZA01038.1	128420026	Haplotype_probs	15	Founder_probs
-5.51791	4.43898	-1.24306	HAPGRP_6	female_flowering_d6_BLOIS_2014_OPT_qDTS8	PZA01038.1	PZA01038.1	128420026	Haplotype_probs	15	Founder_probs
1.03149	6.09005	0.169374	HAPGRP_7	female_flowering_d6_BLOIS_2014_OPT_qDTS8	PZA01038.1	PZA01038.1	128420026	Haplotype_probs	15	Founder_probs
-16.3593	5.78042	-2.83012	HAPGRP_8	female_flowering_d6_BLOIS_2014_OPT_qDTS8	PZA01038.1	PZA01038.1	128420026	Haplotype_probs	15	Founder_probs
-16.3006	4.26503	-3.82191	HAPGRP_9	female_flowering_d6_BLOIS_2014_OPT_qDTS8	PZA01038.1	PZA01038.1	128420026	Haplotype_probs	15	Founder_probs
-0.0738296	5.05618	-0.0146018	HAPGRP_10	female_flowering_d6_BLOIS_2014_OPT_qDTS8	PZA01038.1	PZA01038.1	128420026	Haplotype_probs	15	Founder_probs
12.5783	6.86492	1.83225	HAPGRP_11	female_flowering_d6_BLOIS_2014_OPT_qDTS8	PZA01038.1	PZA01038.1	128420026	Haplotype_probs	15	Founder_probs
-8.27872	5.27139	-1.5705	HAPGRP_12	female_flowering_d6_BLOIS_2014_OPT_qDTS8	PZA01038.1	PZA01038.1	128420026	Haplotype_probs	15	Founder_probs
12.2336	7.24897	1.68764	HAPGRP_13	female_flowering_d6_BLOIS_2014_OPT_qDTS8	PZA01038.1	PZA01038.1	128420026	Haplotype_probs	15	Founder_probs
-12.7062	6.0999	-2.08302	HAPGRP_14	female_flowering_d6_BLOIS_2014_OPT_qDTS8	PZA01038.1	PZA01038.1	128420026	Haplotype_probs	15	Founder_probs
17.2128	6.06901	2.83618	HAPGRP_15	female_flowering_d6_BLOIS_2014_OPT_qDTS8	PZA01038.1	PZA01038.1	128420026	Haplotype_probs	15	Founder_probs
1.53607	2.04411	0.751461	HAPGRP_1	female_flowering_d6_BLOIS_2014_OPT_qDTS9	AX-91146185	AX-91146185	119413544	Haplotype_probs	10	Founder_probs
-18.7471	6.0746	-3.08614	HAPGRP_2	female_flowering_d6_BLOIS_2014_OPT_qDTS9	AX-91146185	AX-91146185	119413544	Haplotype_probs	10	Founder_probs
-5.07023	3.6414	-1.39238	HAPGRP_3	female_flowering_d6_BLOIS_2014_OPT_qDTS9	AX-91146185	AX-91146185	119413544	Haplotype_probs	10	Founder_probs
-5.66328	3.40061	-1.66537	HAPGRP_4	female_flowering_d6_BLOIS_2014_OPT_qDTS9	AX-91146185	AX-91146185	119413544	Haplotype_probs	10	Founder_probs
14.3025	7.35709	1.94404	HAPGRP_5	female_flowering_d6_BLOIS_2014_OPT_qDTS9	AX-91146185	AX-91146185	119413544	Haplotype_probs	10	Founder_probs
1.07928	5.40641	0.199629	HAPGRP_6	female_flowering_d6_BLOIS_2014_OPT_qDTS9	AX-91146185	AX-91146185	119413544	Haplotype_probs	10	Founder_probs
9.36326	4.38262	2.13645	HAPGRP_7	female_flowering_d6_BLOIS_2014_OPT_qDTS9	AX-91146185	AX-91146185	119413544	Haplotype_probs	10	Founder_probs
17.5533	5.65267	3.10531	HAPGRP_8	female_flowering_d6_BLOIS_2014_OPT_qDTS9	AX-91146185	AX-91146185	119413544	Haplotype_probs	10	Founder_probs
-11.0278	5.51597	-1.99926	HAPGRP_9	female_flowering_d6_BLOIS_2014_OPT_qDTS9	AX-91146185	AX-91146185	119413544	Haplotype_probs	10	Founder_probs
5.0075	5.54307	0.90338	HAPGRP_10	female_flowering_d6_BLOIS_2014_OPT_qDTS9	AX-91146185	AX-91146185	119413544	Haplotype_probs	10	Founder_probs
0.954264	5.51646	0.172985	HAPGRP_1	female_flowering_d6_BLOIS_2014_OPT_qDTS3_2	AX-90834861	AX-90834861	160277722	Haplotype_probs	12	Haplotype_probs
-5.39757	6.58383	-0.819821	HAPGRP_2	female_flowering_d6_BLOIS_2014_OPT_qDTS3_2	AX-90834861	AX-90834861	160277722	Haplotype_probs	12	Haplotype_probs
-12.3547	6.14041	-2.01203	HAPGRP_3	female_flowering_d6_BLOIS_2014_OPT_qDTS3_2	AX-90834861	AX-90834861	160277722	Haplotype_probs	12	Haplotype_probs
-26.3142	6.18416	-4.2551	HAPGRP_4	female_flowering_d6_BLOIS_2014_OPT_qDTS3_2	AX-90834861	AX-90834861	160277722	Haplotype_probs	12	Haplotype_probs
16.7231	4.46482	3.74552	HAPGRP_5	female_flowering_d6_BLOIS_2014_OPT_qDTS3_2	AX-90834861	AX-90834861	160277722	Haplotype_probs	12	Haplotype_probs
-8.05953	6.57286	-1.22618	HAPGRP_6	female_flowering_d6_BLOIS_2014_OPT_qDTS3_2	AX-90834861	AX-90834861	160277722	Haplotype_probs	12	Haplotype_probs
-14.8065	3.29441	-4.49443	HAPGRP_7	female_flowering_d6_BLOIS_2014_OPT_qDTS3_2	AX-90834861	AX-90834861	160277722	Haplotype_probs	12	Haplotype_probs
3.32678	3.08721	1.0776	HAPGRP_8	female_flowering_d6_BLOIS_2014_OPT_qDTS3_2	AX-90834861	AX-90834861	160277722	Haplotype_probs	12	Haplotype_probs
1.1934	6.20426	0.192351	HAPGRP_9	female_flowering_d6_BLOIS_2014_OPT_qDTS3_2	AX-90834861	AX-90834861	160277722	Haplotype_probs	12	Haplotype_probs
0.0917478	2.69467	0.0340479	HAPGRP_10	female_flowering_d6_BLOIS_2014_OPT_qDTS3_2	AX-90834861	AX-90834861	160277722	Haplotype_probs	12	Haplotype_probs
21.4354	3.98554	5.37829	HAPGRP_11	female_flowering_d6_BLOIS_2014_OPT_qDTS3_2	AX-90834861	AX-90834861	160277722	Haplotype_probs	12	Haplotype_probs
3.60884	5.07184	0.711545	HAPGRP_12	female_flowering_d6_BLOIS_2014_OPT_qDTS3_2	AX-90834861	AX-90834861	160277722	Haplotype_probs	12	Haplotype_probs
19.8356	3.41759	5.80397	HAPGRP_1	female_flowering_d6_BLOIS_2014_OPT_qDTS8	AX-91442756	AX-91442756	130607082	Haplotype_probs	11	Haplotype_probs
5.13789	6.42686	0.799441	HAPGRP_2	female_flowering_d6_BLOIS_2014_OPT_qDTS8	AX-91442756	AX-91442756	130607082	Haplotype_probs	11	Haplotype_probs
-4.88676	2.09777	-2.3295	HAPGRP_3	female_flowering_d6_BLOIS_2014_OPT_qDTS8	AX-91442756	AX-91442756	130607082	Haplotype_probs	11	Haplotype_probs
5.67728	4.68476	1.21186	HAPGRP_4	female_flowering_d6_BLOIS_2014_OPT_qDTS8	AX-91442756	AX-91442756	130607082	Haplotype_probs	11	Haplotype_probs
-7.8737	3.52074	-2.23638	HAPGRP_5	female_flowering_d6_BLOIS_2014_OPT_qDTS8	AX-91442756	AX-91442756	130607082	Haplotype_probs	11	Haplotype_probs
-19.0758	5.59711	-3.40816	HAPGRP_6	female_flowering_d6_BLOIS_2014_OPT_qDTS8	AX-91442756	AX-91442756	130607082	Haplotype_probs	11	Haplotype_probs
-15.9496	4.25918	-3.74477	HAPGRP_7	female_flowering_d6_BLOIS_2014_OPT_qDTS8	AX-91442756	AX-91442756	130607082	Haplotype_probs	11	Haplotype_probs
0.174386	4.83326	0.0360804	HAPGRP_8	female_flowering_d6_BLOIS_2014_OPT_qDTS8	AX-91442756	AX-91442756	130607082	Haplotype_probs	11	Haplotype_probs
9.77136	7.15961	1.36479	HAPGRP_9	female_flowering_d6_BLOIS_2014_OPT_qDTS8	AX-91442756	AX-91442756	130607082	Haplotype_probs	11	Haplotype_probs
13.6456	7.43664	1.83491	HAPGRP_10	female_flowering_d6_BLOIS_2014_OPT_qDTS8	AX-91442756	AX-91442756	130607082	Haplotype_probs	11	Haplotype_probs
17.8226	6.05214	2.94484	HAPGRP_11	female_flowering_d6_BLOIS_2014_OPT_qDTS8	AX-91442756	AX-91442756	130607082	Haplotype_probs	11	Haplotype_probs
5.61083	5.45659	1.02827	HAPGRP_1	female_flowering_d6_BLOIS_2014_OPT_qDTS9	AX-91800534	AX-91800534	120969378	Haplotype_probs	13	Haplotype_probs
-17.9869	5.75633	-3.12472	HAPGRP_2	female_flowering_d6_BLOIS_2014_OPT_qDTS9	AX-91800534	AX-91800534	120969378	Haplotype_probs	13	Haplotype_probs
-13.9636	4.41293	-3.16425	HAPGRP_3	female_flowering_d6_BLOIS_2014_OPT_qDTS9	AX-91800534	AX-91800534	120969378	Haplotype_probs	13	Haplotype_probs
-3.68991	2.78595	-1.32447	HAPGRP_4	female_flowering_d6_BLOIS_2014_OPT_qDTS9	AX-91800534	AX-91800534	120969378	Haplotype_probs	13	Haplotype_probs
-3.79943	3.39373	-1.11954	HAPGRP_5	female_flowering_d6_BLOIS_2014_OPT_qDTS9	AX-91800534	AX-91800534	120969378	Haplotype_probs	13	Haplotype_probs
9.57657	5.99138	1.59839	HAPGRP_6	female_flowering_d6_BLOIS_2014_OPT_qDTS9	AX-91800534	AX-91800534	120969378	Haplotype_probs	13	Haplotype_probs
14.9118	7.95792	1.87383	HAPGRP_7	female_flowering_d6_BLOIS_2014_OPT_qDTS9	AX-91800534	AX-91800534	120969378	Haplotype_probs	13	Haplotype_probs
-1.3183	5.93948	-0.221955	HAPGRP_8	female_flowering_d6_BLOIS_2014_OPT_qDTS9	AX-91800534	AX-91800534	120969378	Haplotype_probs	13	Haplotype_probs
7.42207	4.19592	1.76888	HAPGRP_9	female_flowering_d6_BLOIS_2014_OPT_qDTS9	AX-91800534	AX-91800534	120969378	Haplotype_probs	13	Haplotype_probs
10.4202	4.19723	2.48263	HAPGRP_10	female_flowering_d6_BLOIS_2014_OPT_qDTS9	AX-91800534	AX-91800534	120969378	Haplotype_probs	13	Haplotype_probs
17.4956	5.25206	3.33118	HAPGRP_11	female_flowering_d6_BLOIS_2014_OPT_qDTS9	AX-91800534	AX-91800534	120969378	Haplotype_probs	13	Haplotype_probs
-11.0025	5.37287	-2.04779	HAPGRP_12	female_flowering_d6_BLOIS_2014_OPT_qDTS9	AX-91800534	AX-91800534	120969378	Haplotype_probs	13	Haplotype_probs
5.08665	5.20725	0.976841	HAPGRP_13	female_flowering_d6_BLOIS_2014_OPT_qDTS9	AX-91800534	AX-91800534	120969378	Haplotype_probs	13	Haplotype_probs
8.03663	4.51724	1.7791	HAPGRP_1	female_flowering_d6_BLOIS_2017_OPT_qDTS8	PZE-108089600	AX-91772542	150981849	Haplotype_probs	13	600K_SNP
12.3062	5.01605	2.45337	HAPGRP_2	female_flowering_d6_BLOIS_2017_OPT_qDTS8	PZE-108089600	AX-91772542	150981849	Haplotype_probs	13	600K_SNP
-6.07417	4.82513	-1.25886	HAPGRP_3	female_flowering_d6_BLOIS_2017_OPT_qDTS8	PZE-108089600	AX-91772542	150981849	Haplotype_probs	13	600K_SNP
7.84785	2.77963	2.82335	HAPGRP_4	female_flowering_d6_BLOIS_2017_OPT_qDTS8	PZE-108089600	AX-91772542	150981849	Haplotype_probs	13	600K_SNP
-9.25381	5.05071	-1.83218	HAPGRP_5	female_flowering_d6_BLOIS_2017_OPT_qDTS8	PZE-108089600	AX-91772542	150981849	Haplotype_probs	13	600K_SNP
3.09948	4.34086	0.714024	HAPGRP_6	female_flowering_d6_BLOIS_2017_OPT_qDTS8	PZE-108089600	AX-91772542	150981849	Haplotype_probs	13	600K_SNP
-19.6913	6.49039	-3.03392	HAPGRP_7	female_flowering_d6_BLOIS_2017_OPT_qDTS8	PZE-108089600	AX-91772542	150981849	Haplotype_probs	13	600K_SNP
-12.4208	4.3524	-2.85377	HAPGRP_8	female_flowering_d6_BLOIS_2017_OPT_qDTS8	PZE-108089600	AX-91772542	150981849	Haplotype_probs	13	600K_SNP
-13.6413	5.65342	-2.41293	HAPGRP_9	female_flowering_d6_BLOIS_2017_OPT_qDTS8	PZE-108089600	AX-91772542	150981849	Haplotype_probs	13	600K_SNP
22.2889	9.49035	2.34859	HAPGRP_10	female_flowering_d6_BLOIS_2017_OPT_qDTS8	PZE-108089600	AX-91772542	150981849	Haplotype_probs	13	600K_SNP
-5.69421	4.66373	-1.22096	HAPGRP_11	female_flowering_d6_BLOIS_2017_OPT_qDTS8	PZE-108089600	AX-91772542	150981849	Haplotype_probs	13	600K_SNP
4.96869	7.79841	0.637142	HAPGRP_12	female_flowering_d6_BLOIS_2017_OPT_qDTS8	PZE-108089600	AX-91772542	150981849	Haplotype_probs	13	600K_SNP
5.87264	8.75103	0.67108	HAPGRP_13	female_flowering_d6_BLOIS_2017_OPT_qDTS8	PZE-108089600	AX-91772542	150981849	Haplotype_probs	13	600K_SNP
-0.93133	6.2697	-0.148545	HAPGRP_1	female_flowering_d6_BLOIS_2017_OPT_qDTS3_2	AX-90834914	AX-90834914	160426458	Haplotype_probs	13	Founder_probs
9.38363	7.40171	1.26777	HAPGRP_2	female_flowering_d6_BLOIS_2017_OPT_qDTS3_2	AX-90834914	AX-90834914	160426458	Haplotype_probs	13	Founder_probs
-19.6827	4.01809	-4.89852	HAPGRP_3	female_flowering_d6_BLOIS_2017_OPT_qDTS3_2	AX-90834914	AX-90834914	160426458	Haplotype_probs	13	Founder_probs
-16.9035	6.6968	-2.52412	HAPGRP_4	female_flowering_d6_BLOIS_2017_OPT_qDTS3_2	AX-90834914	AX-90834914	160426458	Haplotype_probs	13	Founder_probs
9.42852	4.6212	2.04027	HAPGRP_5	female_flowering_d6_BLOIS_2017_OPT_qDTS3_2	AX-90834914	AX-90834914	160426458	Haplotype_probs	13	Founder_probs
-10.7337	7.06552	-1.51917	HAPGRP_6	female_flowering_d6_BLOIS_2017_OPT_qDTS3_2	AX-90834914	AX-90834914	160426458	Haplotype_probs	13	Founder_probs
-4.0892	5.15671	-0.792986	HAPGRP_7	female_flowering_d6_BLOIS_2017_OPT_qDTS3_2	AX-90834914	AX-90834914	160426458	Haplotype_probs	13	Founder_probs
0.442981	3.8862	0.113988	HAPGRP_8	female_flowering_d6_BLOIS_2017_OPT_qDTS3_2	AX-90834914	AX-90834914	160426458	Haplotype_probs	13	Founder_probs
6.39384	6.85101	0.93327	HAPGRP_9	female_flowering_d6_BLOIS_2017_OPT_qDTS3_2	AX-90834914	AX-90834914	160426458	Haplotype_probs	13	Founder_probs
15.8299	4.21334	3.75709	HAPGRP_10	female_flowering_d6_BLOIS_2017_OPT_qDTS3_2	AX-90834914	AX-90834914	160426458	Haplotype_probs	13	Founder_probs
3.49405	3.24962	1.07522	HAPGRP_11	female_flowering_d6_BLOIS_2017_OPT_qDTS3_2	AX-90834914	AX-90834914	160426458	Haplotype_probs	13	Founder_probs
4.24091	4.94267	0.858019	HAPGRP_12	female_flowering_d6_BLOIS_2017_OPT_qDTS3_2	AX-90834914	AX-90834914	160426458	Haplotype_probs	13	Founder_probs
-3.98785	5.47106	-0.728898	HAPGRP_13	female_flowering_d6_BLOIS_2017_OPT_qDTS3_2	AX-90834914	AX-90834914	160426458	Haplotype_probs	13	Founder_probs
8.65777	4.33839	1.99562	HAPGRP_1	female_flowering_d6_BLOIS_2017_OPT_qDTS8	AX-91771730	AX-91771730	146686920	Haplotype_probs	14	Founder_probs
10.9255	4.78992	2.28094	HAPGRP_2	female_flowering_d6_BLOIS_2017_OPT_qDTS8	AX-91771730	AX-91771730	146686920	Haplotype_probs	14	Founder_probs
-7.85588	4.52306	-1.73685	HAPGRP_3	female_flowering_d6_BLOIS_2017_OPT_qDTS8	AX-91771730	AX-91771730	146686920	Haplotype_probs	14	Founder_probs
-4.88211	3.72698	-1.30994	HAPGRP_4	female_flowering_d6_BLOIS_2017_OPT_qDTS8	AX-91771730	AX-91771730	146686920	Haplotype_probs	14	Founder_probs
18.6566	5.35253	3.48556	HAPGRP_5	female_flowering_d6_BLOIS_2017_OPT_qDTS8	AX-91771730	AX-91771730	146686920	Haplotype_probs	14	Founder_probs
-5.62266	4.84257	-1.16109	HAPGRP_6	female_flowering_d6_BLOIS_2017_OPT_qDTS8	AX-91771730	AX-91771730	146686920	Haplotype_probs	14	Founder_probs
-4.81122	5.20484	-0.924374	HAPGRP_7	female_flowering_d6_BLOIS_2017_OPT_qDTS8	AX-91771730	AX-91771730	146686920	Haplotype_probs	14	Founder_probs
0.64768	5.97201	0.108453	HAPGRP_8	female_flowering_d6_BLOIS_2017_OPT_qDTS8	AX-91771730	AX-91771730	146686920	Haplotype_probs	14	Founder_probs
-17.6255	5.88064	-2.99721	HAPGRP_9	female_flowering_d6_BLOIS_2017_OPT_qDTS8	AX-91771730	AX-91771730	146686920	Haplotype_probs	14	Founder_probs
-13.2827	4.38365	-3.03006	HAPGRP_10	female_flowering_d6_BLOIS_2017_OPT_qDTS8	AX-91771730	AX-91771730	146686920	Haplotype_probs	14	Founder_probs
30.788	9.26288	3.32381	HAPGRP_11	female_flowering_d6_BLOIS_2017_OPT_qDTS8	AX-91771730	AX-91771730	146686920	Haplotype_probs	14	Founder_probs
-8.48971	4.4884	-1.89148	HAPGRP_12	female_flowering_d6_BLOIS_2017_OPT_qDTS8	AX-91771730	AX-91771730	146686920	Haplotype_probs	14	Founder_probs
11.7225	4.24677	2.76033	HAPGRP_13	female_flowering_d6_BLOIS_2017_OPT_qDTS8	AX-91771730	AX-91771730	146686920	Haplotype_probs	14	Founder_probs
9.84159	8.54202	1.15214	HAPGRP_14	female_flowering_d6_BLOIS_2017_OPT_qDTS8	AX-91771730	AX-91771730	146686920	Haplotype_probs	14	Founder_probs
-0.93133	6.2697	-0.148545	HAPGRP_1	female_flowering_d6_BLOIS_2017_OPT_qDTS3_2	AX-90834914	AX-90834914	160426458	Haplotype_probs	13	Haplotype_probs
9.38363	7.40171	1.26777	HAPGRP_2	female_flowering_d6_BLOIS_2017_OPT_qDTS3_2	AX-90834914	AX-90834914	160426458	Haplotype_probs	13	Haplotype_probs
-19.6827	4.01809	-4.89852	HAPGRP_3	female_flowering_d6_BLOIS_2017_OPT_qDTS3_2	AX-90834914	AX-90834914	160426458	Haplotype_probs	13	Haplotype_probs
-16.9035	6.6968	-2.52412	HAPGRP_4	female_flowering_d6_BLOIS_2017_OPT_qDTS3_2	AX-90834914	AX-90834914	160426458	Haplotype_probs	13	Haplotype_probs
9.42852	4.6212	2.04027	HAPGRP_5	female_flowering_d6_BLOIS_2017_OPT_qDTS3_2	AX-90834914	AX-90834914	160426458	Haplotype_probs	13	Haplotype_probs
-10.7337	7.06552	-1.51917	HAPGRP_6	female_flowering_d6_BLOIS_2017_OPT_qDTS3_2	AX-90834914	AX-90834914	160426458	Haplotype_probs	13	Haplotype_probs
-4.0892	5.15671	-0.792986	HAPGRP_7	female_flowering_d6_BLOIS_2017_OPT_qDTS3_2	AX-90834914	AX-90834914	160426458	Haplotype_probs	13	Haplotype_probs
0.442981	3.8862	0.113988	HAPGRP_8	female_flowering_d6_BLOIS_2017_OPT_qDTS3_2	AX-90834914	AX-90834914	160426458	Haplotype_probs	13	Haplotype_probs
6.39384	6.85101	0.93327	HAPGRP_9	female_flowering_d6_BLOIS_2017_OPT_qDTS3_2	AX-90834914	AX-90834914	160426458	Haplotype_probs	13	Haplotype_probs
15.8299	4.21334	3.75709	HAPGRP_10	female_flowering_d6_BLOIS_2017_OPT_qDTS3_2	AX-90834914	AX-90834914	160426458	Haplotype_probs	13	Haplotype_probs
3.49405	3.24962	1.07522	HAPGRP_11	female_flowering_d6_BLOIS_2017_OPT_qDTS3_2	AX-90834914	AX-90834914	160426458	Haplotype_probs	13	Haplotype_probs
4.24091	4.94267	0.858019	HAPGRP_12	female_flowering_d6_BLOIS_2017_OPT_qDTS3_2	AX-90834914	AX-90834914	160426458	Haplotype_probs	13	Haplotype_probs
-3.98785	5.47106	-0.728898	HAPGRP_13	female_flowering_d6_BLOIS_2017_OPT_qDTS3_2	AX-90834914	AX-90834914	160426458	Haplotype_probs	13	Haplotype_probs
8.63429	4.30375	2.00623	HAPGRP_1	female_flowering_d6_BLOIS_2017_OPT_qDTS8	AX-91106528	AX-91106528	148924506	Haplotype_probs	15	Haplotype_probs
12.3642	3.48144	3.55146	HAPGRP_2	female_flowering_d6_BLOIS_2017_OPT_qDTS8	AX-91106528	AX-91106528	148924506	Haplotype_probs	15	Haplotype_probs
-7.35073	4.57059	-1.60827	HAPGRP_3	female_flowering_d6_BLOIS_2017_OPT_qDTS8	AX-91106528	AX-91106528	148924506	Haplotype_probs	15	Haplotype_probs
2.59376	4.88394	0.53108	HAPGRP_4	female_flowering_d6_BLOIS_2017_OPT_qDTS8	AX-91106528	AX-91106528	148924506	Haplotype_probs	15	Haplotype_probs
18.8497	5.3033	3.55433	HAPGRP_5	female_flowering_d6_BLOIS_2017_OPT_qDTS8	AX-91106528	AX-91106528	148924506	Haplotype_probs	15	Haplotype_probs
-5.72252	4.91125	-1.16519	HAPGRP_6	female_flowering_d6_BLOIS_2017_OPT_qDTS8	AX-91106528	AX-91106528	148924506	Haplotype_probs	15	Haplotype_probs
-3.78522	4.87188	-0.776954	HAPGRP_7	female_flowering_d6_BLOIS_2017_OPT_qDTS8	AX-91106528	AX-91106528	148924506	Haplotype_probs	15	Haplotype_probs
0.914874	6.00603	0.152326	HAPGRP_8	female_flowering_d6_BLOIS_2017_OPT_qDTS8	AX-91106528	AX-91106528	148924506	Haplotype_probs	15	Haplotype_probs
-17.8153	5.83079	-3.05538	HAPGRP_9	female_flowering_d6_BLOIS_2017_OPT_qDTS8	AX-91106528	AX-91106528	148924506	Haplotype_probs	15	Haplotype_probs
-13.172	4.34781	-3.02956	HAPGRP_10	female_flowering_d6_BLOIS_2017_OPT_qDTS8	AX-91106528	AX-91106528	148924506	Haplotype_probs	15	Haplotype_probs
-15.687	5.66392	-2.76963	HAPGRP_11	female_flowering_d6_BLOIS_2017_OPT_qDTS8	AX-91106528	AX-91106528	148924506	Haplotype_probs	15	Haplotype_probs
30.4581	9.1829	3.31683	HAPGRP_12	female_flowering_d6_BLOIS_2017_OPT_qDTS8	AX-91106528	AX-91106528	148924506	Haplotype_probs	15	Haplotype_probs
-8.72184	4.63549	-1.88153	HAPGRP_13	female_flowering_d6_BLOIS_2017_OPT_qDTS8	AX-91106528	AX-91106528	148924506	Haplotype_probs	15	Haplotype_probs
6.24001	7.17144	0.87012	HAPGRP_14	female_flowering_d6_BLOIS_2017_OPT_qDTS8	AX-91106528	AX-91106528	148924506	Haplotype_probs	15	Haplotype_probs
5.51778	7.90398	0.698102	HAPGRP_15	female_flowering_d6_BLOIS_2017_OPT_qDTS8	AX-91106528	AX-91106528	148924506	Haplotype_probs	15	Haplotype_probs
10.472	6.68388	1.56675	HAPGRP_1	female_flowering_d6_GRANEROS_2015_OPT_qDTS3_2	AX-90835099	AX-91583440	161296968	Haplotype_probs	16	600K_SNP
-5.45997	8.3308	-0.655396	HAPGRP_2	female_flowering_d6_GRANEROS_2015_OPT_qDTS3_2	AX-90835099	AX-91583440	161296968	Haplotype_probs	16	600K_SNP
-12.6893	6.489	-1.95551	HAPGRP_3	female_flowering_d6_GRANEROS_2015_OPT_qDTS3_2	AX-90835099	AX-91583440	161296968	Haplotype_probs	16	600K_SNP
-18.1928	7.21599	-2.52118	HAPGRP_4	female_flowering_d6_GRANEROS_2015_OPT_qDTS3_2	AX-90835099	AX-91583440	161296968	Haplotype_probs	16	600K_SNP
16.4152	5.12013	3.206	HAPGRP_5	female_flowering_d6_GRANEROS_2015_OPT_qDTS3_2	AX-90835099	AX-91583440	161296968	Haplotype_probs	16	600K_SNP
-8.37563	7.37611	-1.13551	HAPGRP_6	female_flowering_d6_GRANEROS_2015_OPT_qDTS3_2	AX-90835099	AX-91583440	161296968	Haplotype_probs	16	600K_SNP
-11.712	6.02092	-1.94522	HAPGRP_7	female_flowering_d6_GRANEROS_2015_OPT_qDTS3_2	AX-90835099	AX-91583440	161296968	Haplotype_probs	16	600K_SNP
-0.745448	5.28469	-0.141058	HAPGRP_8	female_flowering_d6_GRANEROS_2015_OPT_qDTS3_2	AX-90835099	AX-91583440	161296968	Haplotype_probs	16	600K_SNP
-23.2246	6.04054	-3.84479	HAPGRP_9	female_flowering_d6_GRANEROS_2015_OPT_qDTS3_2	AX-90835099	AX-91583440	161296968	Haplotype_probs	16	600K_SNP
0.811893	6.99935	0.115995	HAPGRP_10	female_flowering_d6_GRANEROS_2015_OPT_qDTS3_2	AX-90835099	AX-91583440	161296968	Haplotype_probs	16	600K_SNP
5.84221	8.72519	0.669579	HAPGRP_11	female_flowering_d6_GRANEROS_2015_OPT_qDTS3_2	AX-90835099	AX-91583440	161296968	Haplotype_probs	16	600K_SNP
26.2859	4.73789	5.54801	HAPGRP_12	female_flowering_d6_GRANEROS_2015_OPT_qDTS3_2	AX-90835099	AX-91583440	161296968	Haplotype_probs	16	600K_SNP
-1.55953	4.50237	-0.346379	HAPGRP_13	female_flowering_d6_GRANEROS_2015_OPT_qDTS3_2	AX-90835099	AX-91583440	161296968	Haplotype_probs	16	600K_SNP
0.321953	5.2614	0.0611916	HAPGRP_14	female_flowering_d6_GRANEROS_2015_OPT_qDTS3_2	AX-90835099	AX-91583440	161296968	Haplotype_probs	16	600K_SNP
-1.73454	6.00861	-0.288676	HAPGRP_15	female_flowering_d6_GRANEROS_2015_OPT_qDTS3_2	AX-90835099	AX-91583440	161296968	Haplotype_probs	16	600K_SNP
-3.1279	6.11923	-0.511158	HAPGRP_16	female_flowering_d6_GRANEROS_2015_OPT_qDTS3_2	AX-90835099	AX-91583440	161296968	Haplotype_probs	16	600K_SNP
28.6206	5.54784	5.15887	HAPGRP_1	female_flowering_d6_GRANEROS_2015_OPT_qDTS8	AX-91099031	AX-91099045	120807460	Haplotype_probs	15	600K_SNP
8.69347	4.28576	2.02846	HAPGRP_2	female_flowering_d6_GRANEROS_2015_OPT_qDTS8	AX-91099031	AX-91099045	120807460	Haplotype_probs	15	600K_SNP
3.71778	4.7844	0.777062	HAPGRP_3	female_flowering_d6_GRANEROS_2015_OPT_qDTS8	AX-91099031	AX-91099045	120807460	Haplotype_probs	15	600K_SNP
0.622056	6.98786	0.0890195	HAPGRP_4	female_flowering_d6_GRANEROS_2015_OPT_qDTS8	AX-91099031	AX-91099045	120807460	Haplotype_probs	15	600K_SNP
-11.9888	4.48315	-2.67419	HAPGRP_5	female_flowering_d6_GRANEROS_2015_OPT_qDTS8	AX-91099031	AX-91099045	120807460	Haplotype_probs	15	600K_SNP
-5.39681	7.06831	-0.763523	HAPGRP_6	female_flowering_d6_GRANEROS_2015_OPT_qDTS8	AX-91099031	AX-91099045	120807460	Haplotype_probs	15	600K_SNP
8.48867	8.02743	1.05746	HAPGRP_7	female_flowering_d6_GRANEROS_2015_OPT_qDTS8	AX-91099031	AX-91099045	120807460	Haplotype_probs	15	600K_SNP
-14.8632	5.24048	-2.83623	HAPGRP_8	female_flowering_d6_GRANEROS_2015_OPT_qDTS8	AX-91099031	AX-91099045	120807460	Haplotype_probs	15	600K_SNP
-5.85978	5.05031	-1.16028	HAPGRP_9	female_flowering_d6_GRANEROS_2015_OPT_qDTS8	AX-91099031	AX-91099045	120807460	Haplotype_probs	15	600K_SNP
-6.95209	6.23538	-1.11494	HAPGRP_10	female_flowering_d6_GRANEROS_2015_OPT_qDTS8	AX-91099031	AX-91099045	120807460	Haplotype_probs	15	600K_SNP
12.4511	8.57642	1.45178	HAPGRP_11	female_flowering_d6_GRANEROS_2015_OPT_qDTS8	AX-91099031	AX-91099045	120807460	Haplotype_probs	15	600K_SNP
-11.5038	5.12139	-2.24623	HAPGRP_12	female_flowering_d6_GRANEROS_2015_OPT_qDTS8	AX-91099031	AX-91099045	120807460	Haplotype_probs	15	600K_SNP
4.40921	8.89625	0.495625	HAPGRP_13	female_flowering_d6_GRANEROS_2015_OPT_qDTS8	AX-91099031	AX-91099045	120807460	Haplotype_probs	15	600K_SNP
-23.2178	6.70975	-3.46031	HAPGRP_14	female_flowering_d6_GRANEROS_2015_OPT_qDTS8	AX-91099031	AX-91099045	120807460	Haplotype_probs	15	600K_SNP
18.862	5.58721	3.37592	HAPGRP_15	female_flowering_d6_GRANEROS_2015_OPT_qDTS8	AX-91099031	AX-91099045	120807460	Haplotype_probs	15	600K_SNP
10.472	6.68388	1.56675	HAPGRP_1	female_flowering_d6_GRANEROS_2015_OPT_qDTS3_2	AX-90835093	AX-91583440	161293416	Haplotype_probs	16	Founder_probs
-5.45997	8.3308	-0.655396	HAPGRP_2	female_flowering_d6_GRANEROS_2015_OPT_qDTS3_2	AX-90835093	AX-91583440	161293416	Haplotype_probs	16	Founder_probs
-12.6893	6.489	-1.95551	HAPGRP_3	female_flowering_d6_GRANEROS_2015_OPT_qDTS3_2	AX-90835093	AX-91583440	161293416	Haplotype_probs	16	Founder_probs
-18.1928	7.21599	-2.52118	HAPGRP_4	female_flowering_d6_GRANEROS_2015_OPT_qDTS3_2	AX-90835093	AX-91583440	161293416	Haplotype_probs	16	Founder_probs
16.4152	5.12013	3.206	HAPGRP_5	female_flowering_d6_GRANEROS_2015_OPT_qDTS3_2	AX-90835093	AX-91583440	161293416	Haplotype_probs	16	Founder_probs
-8.37563	7.37611	-1.13551	HAPGRP_6	female_flowering_d6_GRANEROS_2015_OPT_qDTS3_2	AX-90835093	AX-91583440	161293416	Haplotype_probs	16	Founder_probs
-11.712	6.02092	-1.94522	HAPGRP_7	female_flowering_d6_GRANEROS_2015_OPT_qDTS3_2	AX-90835093	AX-91583440	161293416	Haplotype_probs	16	Founder_probs
-0.745448	5.28469	-0.141058	HAPGRP_8	female_flowering_d6_GRANEROS_2015_OPT_qDTS3_2	AX-90835093	AX-91583440	161293416	Haplotype_probs	16	Founder_probs
-23.2246	6.04054	-3.84479	HAPGRP_9	female_flowering_d6_GRANEROS_2015_OPT_qDTS3_2	AX-90835093	AX-91583440	161293416	Haplotype_probs	16	Founder_probs
0.811893	6.99935	0.115995	HAPGRP_10	female_flowering_d6_GRANEROS_2015_OPT_qDTS3_2	AX-90835093	AX-91583440	161293416	Haplotype_probs	16	Founder_probs
5.84221	8.72519	0.669579	HAPGRP_11	female_flowering_d6_GRANEROS_2015_OPT_qDTS3_2	AX-90835093	AX-91583440	161293416	Haplotype_probs	16	Founder_probs
26.2859	4.73789	5.54801	HAPGRP_12	female_flowering_d6_GRANEROS_2015_OPT_qDTS3_2	AX-90835093	AX-91583440	161293416	Haplotype_probs	16	Founder_probs
-1.55953	4.50237	-0.346379	HAPGRP_13	female_flowering_d6_GRANEROS_2015_OPT_qDTS3_2	AX-90835093	AX-91583440	161293416	Haplotype_probs	16	Founder_probs
0.321953	5.2614	0.0611916	HAPGRP_14	female_flowering_d6_GRANEROS_2015_OPT_qDTS3_2	AX-90835093	AX-91583440	161293416	Haplotype_probs	16	Founder_probs
-1.73454	6.00861	-0.288676	HAPGRP_15	female_flowering_d6_GRANEROS_2015_OPT_qDTS3_2	AX-90835093	AX-91583440	161293416	Haplotype_probs	16	Founder_probs
-3.1279	6.11923	-0.511158	HAPGRP_16	female_flowering_d6_GRANEROS_2015_OPT_qDTS3_2	AX-90835093	AX-91583440	161293416	Haplotype_probs	16	Founder_probs
28.6901	5.55677	5.1631	HAPGRP_1	female_flowering_d6_GRANEROS_2015_OPT_qDTS8	AX-91099134	AX-91099066	121124614	Haplotype_probs	16	Founder_probs
6.01997	6.99608	0.860478	HAPGRP_2	female_flowering_d6_GRANEROS_2015_OPT_qDTS8	AX-91099134	AX-91099066	121124614	Haplotype_probs	16	Founder_probs
3.7857	4.79729	0.789134	HAPGRP_3	female_flowering_d6_GRANEROS_2015_OPT_qDTS8	AX-91099134	AX-91099066	121124614	Haplotype_probs	16	Founder_probs
10.4547	5.68605	1.83867	HAPGRP_4	female_flowering_d6_GRANEROS_2015_OPT_qDTS8	AX-91099134	AX-91099066	121124614	Haplotype_probs	16	Founder_probs
0.818099	7.15609	0.114322	HAPGRP_5	female_flowering_d6_GRANEROS_2015_OPT_qDTS8	AX-91099134	AX-91099066	121124614	Haplotype_probs	16	Founder_probs
-12.3492	4.46681	-2.76465	HAPGRP_6	female_flowering_d6_GRANEROS_2015_OPT_qDTS8	AX-91099134	AX-91099066	121124614	Haplotype_probs	16	Founder_probs
-5.23185	7.04228	-0.74292	HAPGRP_7	female_flowering_d6_GRANEROS_2015_OPT_qDTS8	AX-91099134	AX-91099066	121124614	Haplotype_probs	16	Founder_probs
8.48512	8.04436	1.05479	HAPGRP_8	female_flowering_d6_GRANEROS_2015_OPT_qDTS8	AX-91099134	AX-91099066	121124614	Haplotype_probs	16	Founder_probs
-14.332	5.36439	-2.6717	HAPGRP_9	female_flowering_d6_GRANEROS_2015_OPT_qDTS8	AX-91099134	AX-91099066	121124614	Haplotype_probs	16	Founder_probs
-5.87133	5.06015	-1.16031	HAPGRP_10	female_flowering_d6_GRANEROS_2015_OPT_qDTS8	AX-91099134	AX-91099066	121124614	Haplotype_probs	16	Founder_probs
-6.93137	6.24837	-1.10931	HAPGRP_11	female_flowering_d6_GRANEROS_2015_OPT_qDTS8	AX-91099134	AX-91099066	121124614	Haplotype_probs	16	Founder_probs
12.4807	8.59335	1.45237	HAPGRP_12	female_flowering_d6_GRANEROS_2015_OPT_qDTS8	AX-91099134	AX-91099066	121124614	Haplotype_probs	16	Founder_probs
-11.5077	5.13083	-2.24285	HAPGRP_13	female_flowering_d6_GRANEROS_2015_OPT_qDTS8	AX-91099134	AX-91099066	121124614	Haplotype_probs	16	Founder_probs
4.28475	8.91686	0.480523	HAPGRP_14	female_flowering_d6_GRANEROS_2015_OPT_qDTS8	AX-91099134	AX-91099066	121124614	Haplotype_probs	16	Founder_probs
-23.2718	6.72371	-3.46115	HAPGRP_15	female_flowering_d6_GRANEROS_2015_OPT_qDTS8	AX-91099134	AX-91099066	121124614	Haplotype_probs	16	Founder_probs
18.8486	5.5991	3.36636	HAPGRP_16	female_flowering_d6_GRANEROS_2015_OPT_qDTS8	AX-91099134	AX-91099066	121124614	Haplotype_probs	16	Founder_probs
9.69126	6.8356	1.41776	HAPGRP_1	female_flowering_d6_GRANEROS_2015_OPT_qDTS3_2	AX-90834914	AX-90834914	160426458	Haplotype_probs	13	Haplotype_probs
-4.49263	7.89601	-0.568975	HAPGRP_2	female_flowering_d6_GRANEROS_2015_OPT_qDTS3_2	AX-90834914	AX-90834914	160426458	Haplotype_probs	13	Haplotype_probs
-19.8004	4.39224	-4.50804	HAPGRP_3	female_flowering_d6_GRANEROS_2015_OPT_qDTS3_2	AX-90834914	AX-90834914	160426458	Haplotype_probs	13	Haplotype_probs
-18.486	7.15521	-2.58357	HAPGRP_4	female_flowering_d6_GRANEROS_2015_OPT_qDTS3_2	AX-90834914	AX-90834914	160426458	Haplotype_probs	13	Haplotype_probs
14.8717	4.88394	3.04503	HAPGRP_5	female_flowering_d6_GRANEROS_2015_OPT_qDTS3_2	AX-90834914	AX-90834914	160426458	Haplotype_probs	13	Haplotype_probs
-8.4699	7.31617	-1.1577	HAPGRP_6	female_flowering_d6_GRANEROS_2015_OPT_qDTS3_2	AX-90834914	AX-90834914	160426458	Haplotype_probs	13	Haplotype_probs
-11.5697	5.98057	-1.93454	HAPGRP_7	female_flowering_d6_GRANEROS_2015_OPT_qDTS3_2	AX-90834914	AX-90834914	160426458	Haplotype_probs	13	Haplotype_probs
1.17074	4.25418	0.275198	HAPGRP_8	female_flowering_d6_GRANEROS_2015_OPT_qDTS3_2	AX-90834914	AX-90834914	160426458	Haplotype_probs	13	Haplotype_probs
4.14957	8.29558	0.500215	HAPGRP_9	female_flowering_d6_GRANEROS_2015_OPT_qDTS3_2	AX-90834914	AX-90834914	160426458	Haplotype_probs	13	Haplotype_probs
26.5695	4.69503	5.65907	HAPGRP_10	female_flowering_d6_GRANEROS_2015_OPT_qDTS3_2	AX-90834914	AX-90834914	160426458	Haplotype_probs	13	Haplotype_probs
-1.31854	3.48901	-0.377914	HAPGRP_11	female_flowering_d6_GRANEROS_2015_OPT_qDTS3_2	AX-90834914	AX-90834914	160426458	Haplotype_probs	13	Haplotype_probs
0.6635	5.19989	0.127599	HAPGRP_12	female_flowering_d6_GRANEROS_2015_OPT_qDTS3_2	AX-90834914	AX-90834914	160426458	Haplotype_probs	13	Haplotype_probs
-4.86515	5.86982	-0.82884	HAPGRP_13	female_flowering_d6_GRANEROS_2015_OPT_qDTS3_2	AX-90834914	AX-90834914	160426458	Haplotype_probs	13	Haplotype_probs
28.5001	5.53053	5.15323	HAPGRP_1	female_flowering_d6_GRANEROS_2015_OPT_qDTS8	AX-90590533	AX-90590533	120660344	Haplotype_probs	14	Haplotype_probs
8.72159	4.27432	2.04046	HAPGRP_2	female_flowering_d6_GRANEROS_2015_OPT_qDTS8	AX-90590533	AX-90590533	120660344	Haplotype_probs	14	Haplotype_probs
5.07196	3.91351	1.29601	HAPGRP_3	female_flowering_d6_GRANEROS_2015_OPT_qDTS8	AX-90590533	AX-90590533	120660344	Haplotype_probs	14	Haplotype_probs
0.524928	6.9711	0.0753006	HAPGRP_4	female_flowering_d6_GRANEROS_2015_OPT_qDTS8	AX-90590533	AX-90590533	120660344	Haplotype_probs	14	Haplotype_probs
-11.895	4.46866	-2.66188	HAPGRP_5	female_flowering_d6_GRANEROS_2015_OPT_qDTS8	AX-90590533	AX-90590533	120660344	Haplotype_probs	14	Haplotype_probs
-5.62401	7.04422	-0.798386	HAPGRP_6	female_flowering_d6_GRANEROS_2015_OPT_qDTS8	AX-90590533	AX-90590533	120660344	Haplotype_probs	14	Haplotype_probs
-14.9472	5.20362	-2.87246	HAPGRP_7	female_flowering_d6_GRANEROS_2015_OPT_qDTS8	AX-90590533	AX-90590533	120660344	Haplotype_probs	14	Haplotype_probs
-5.89192	5.03837	-1.16941	HAPGRP_8	female_flowering_d6_GRANEROS_2015_OPT_qDTS8	AX-90590533	AX-90590533	120660344	Haplotype_probs	14	Haplotype_probs
-7.0508	6.21952	-1.13366	HAPGRP_9	female_flowering_d6_GRANEROS_2015_OPT_qDTS8	AX-90590533	AX-90590533	120660344	Haplotype_probs	14	Haplotype_probs
12.4876	8.55771	1.45922	HAPGRP_10	female_flowering_d6_GRANEROS_2015_OPT_qDTS8	AX-90590533	AX-90590533	120660344	Haplotype_probs	14	Haplotype_probs
-11.432	5.1082	-2.23798	HAPGRP_11	female_flowering_d6_GRANEROS_2015_OPT_qDTS8	AX-90590533	AX-90590533	120660344	Haplotype_probs	14	Haplotype_probs
4.24504	8.87274	0.478436	HAPGRP_12	female_flowering_d6_GRANEROS_2015_OPT_qDTS8	AX-90590533	AX-90590533	120660344	Haplotype_probs	14	Haplotype_probs
-23.1001	6.68979	-3.45303	HAPGRP_13	female_flowering_d6_GRANEROS_2015_OPT_qDTS8	AX-90590533	AX-90590533	120660344	Haplotype_probs	14	Haplotype_probs
18.9808	5.5708	3.40719	HAPGRP_14	female_flowering_d6_GRANEROS_2015_OPT_qDTS8	AX-90590533	AX-90590533	120660344	Haplotype_probs	14	Haplotype_probs
13.7893	4.09993	3.3633	HAPGRP_1	female_flowering_d6_NERAC_2016_WD_qDTS3_2	AX-90586701	AX-90834938	160559504	Haplotype_probs	11	600K_SNP
-5.13712	10.3758	-0.495106	HAPGRP_2	female_flowering_d6_NERAC_2016_WD_qDTS3_2	AX-90586701	AX-90834938	160559504	Haplotype_probs	11	600K_SNP
-34.2488	5.84972	-5.85479	HAPGRP_3	female_flowering_d6_NERAC_2016_WD_qDTS3_2	AX-90586701	AX-90834938	160559504	Haplotype_probs	11	600K_SNP
-27.9488	9.42747	-2.96462	HAPGRP_4	female_flowering_d6_NERAC_2016_WD_qDTS3_2	AX-90586701	AX-90834938	160559504	Haplotype_probs	11	600K_SNP
25.3957	6.64012	3.82459	HAPGRP_5	female_flowering_d6_NERAC_2016_WD_qDTS3_2	AX-90586701	AX-90834938	160559504	Haplotype_probs	11	600K_SNP
-15.7731	9.89577	-1.59393	HAPGRP_6	female_flowering_d6_NERAC_2016_WD_qDTS3_2	AX-90586701	AX-90834938	160559504	Haplotype_probs	11	600K_SNP
-13.4178	7.5679	-1.77299	HAPGRP_7	female_flowering_d6_NERAC_2016_WD_qDTS3_2	AX-90586701	AX-90834938	160559504	Haplotype_probs	11	600K_SNP
-0.84284	5.68481	-0.148262	HAPGRP_8	female_flowering_d6_NERAC_2016_WD_qDTS3_2	AX-90586701	AX-90834938	160559504	Haplotype_probs	11	600K_SNP
9.30775	11.1289	0.836357	HAPGRP_9	female_flowering_d6_NERAC_2016_WD_qDTS3_2	AX-90586701	AX-90834938	160559504	Haplotype_probs	11	600K_SNP
6.99816	4.651	1.50466	HAPGRP_10	female_flowering_d6_NERAC_2016_WD_qDTS3_2	AX-90586701	AX-90834938	160559504	Haplotype_probs	11	600K_SNP
0.633499	7.99689	0.0792182	HAPGRP_11	female_flowering_d6_NERAC_2016_WD_qDTS3_2	AX-90586701	AX-90834938	160559504	Haplotype_probs	11	600K_SNP
12.9293	8.5575	1.51087	HAPGRP_1	female_flowering_d6_NERAC_2016_WD_qDTS3_2	AX-90834914	AX-90834914	160426458	Haplotype_probs	13	Founder_probs
-6.17721	10.8178	-0.571025	HAPGRP_2	female_flowering_d6_NERAC_2016_WD_qDTS3_2	AX-90834914	AX-90834914	160426458	Haplotype_probs	13	Founder_probs
-34.3394	5.83354	-5.88655	HAPGRP_3	female_flowering_d6_NERAC_2016_WD_qDTS3_2	AX-90834914	AX-90834914	160426458	Haplotype_probs	13	Founder_probs
-28.6056	9.40526	-3.04145	HAPGRP_4	female_flowering_d6_NERAC_2016_WD_qDTS3_2	AX-90834914	AX-90834914	160426458	Haplotype_probs	13	Founder_probs
25.4441	6.62134	3.84274	HAPGRP_5	female_flowering_d6_NERAC_2016_WD_qDTS3_2	AX-90834914	AX-90834914	160426458	Haplotype_probs	13	Founder_probs
-15.6439	9.86481	-1.58583	HAPGRP_6	female_flowering_d6_NERAC_2016_WD_qDTS3_2	AX-90834914	AX-90834914	160426458	Haplotype_probs	13	Founder_probs
-13.5952	7.54426	-1.80206	HAPGRP_7	female_flowering_d6_NERAC_2016_WD_qDTS3_2	AX-90834914	AX-90834914	160426458	Haplotype_probs	13	Founder_probs
-0.634169	5.66995	-0.111847	HAPGRP_8	female_flowering_d6_NERAC_2016_WD_qDTS3_2	AX-90834914	AX-90834914	160426458	Haplotype_probs	13	Founder_probs
9.48422	10.9532	0.865886	HAPGRP_9	female_flowering_d6_NERAC_2016_WD_qDTS3_2	AX-90834914	AX-90834914	160426458	Haplotype_probs	13	Founder_probs
22.3635	6.33481	3.53026	HAPGRP_10	female_flowering_d6_NERAC_2016_WD_qDTS3_2	AX-90834914	AX-90834914	160426458	Haplotype_probs	13	Founder_probs
6.96257	4.64012	1.50051	HAPGRP_11	female_flowering_d6_NERAC_2016_WD_qDTS3_2	AX-90834914	AX-90834914	160426458	Haplotype_probs	13	Founder_probs
3.57095	7.21512	0.494927	HAPGRP_12	female_flowering_d6_NERAC_2016_WD_qDTS3_2	AX-90834914	AX-90834914	160426458	Haplotype_probs	13	Founder_probs
0.75542	7.97468	0.0947273	HAPGRP_13	female_flowering_d6_NERAC_2016_WD_qDTS3_2	AX-90834914	AX-90834914	160426458	Haplotype_probs	13	Founder_probs
15.9666	7.68562	2.07746	HAPGRP_1	female_flowering_d6_NERAC_2016_WD_qDTS3_1	AX-90796878	AX-90796878	10867320	Haplotype_probs	10	Haplotype_probs
13.7601	5.74471	2.39526	HAPGRP_2	female_flowering_d6_NERAC_2016_WD_qDTS3_1	AX-90796878	AX-90796878	10867320	Haplotype_probs	10	Haplotype_probs
-30.1491	6.67513	-4.51662	HAPGRP_3	female_flowering_d6_NERAC_2016_WD_qDTS3_1	AX-90796878	AX-90796878	10867320	Haplotype_probs	10	Haplotype_probs
-10.8458	4.41612	-2.45596	HAPGRP_4	female_flowering_d6_NERAC_2016_WD_qDTS3_1	AX-90796878	AX-90796878	10867320	Haplotype_probs	10	Haplotype_probs
1.6758	6.2952	0.266203	HAPGRP_5	female_flowering_d6_NERAC_2016_WD_qDTS3_1	AX-90796878	AX-90796878	10867320	Haplotype_probs	10	Haplotype_probs
-3.13642	8.40528	-0.373149	HAPGRP_6	female_flowering_d6_NERAC_2016_WD_qDTS3_1	AX-90796878	AX-90796878	10867320	Haplotype_probs	10	Haplotype_probs
-0.459504	7.39348	-0.0621499	HAPGRP_7	female_flowering_d6_NERAC_2016_WD_qDTS3_1	AX-90796878	AX-90796878	10867320	Haplotype_probs	10	Haplotype_probs
21.1694	8.30789	2.54811	HAPGRP_8	female_flowering_d6_NERAC_2016_WD_qDTS3_1	AX-90796878	AX-90796878	10867320	Haplotype_probs	10	Haplotype_probs
1.17675	6.64296	0.177142	HAPGRP_9	female_flowering_d6_NERAC_2016_WD_qDTS3_1	AX-90796878	AX-90796878	10867320	Haplotype_probs	10	Haplotype_probs
10.2821	7.17481	1.43309	HAPGRP_10	female_flowering_d6_NERAC_2016_WD_qDTS3_1	AX-90796878	AX-90796878	10867320	Haplotype_probs	10	Haplotype_probs
19.467	5.05154	3.85367	HAPGRP_1	female_flowering_d6_NERAC_2016_WD_qDTS3_2	AX-91583302	AX-91583302	160518557	Haplotype_probs	12	Haplotype_probs
-5.2045	10.3167	-0.504472	HAPGRP_2	female_flowering_d6_NERAC_2016_WD_qDTS3_2	AX-91583302	AX-91583302	160518557	Haplotype_probs	12	Haplotype_probs
-34.3848	5.80529	-5.92301	HAPGRP_3	female_flowering_d6_NERAC_2016_WD_qDTS3_2	AX-91583302	AX-91583302	160518557	Haplotype_probs	12	Haplotype_probs
-28.1043	9.36498	-3.001	HAPGRP_4	female_flowering_d6_NERAC_2016_WD_qDTS3_2	AX-91583302	AX-91583302	160518557	Haplotype_probs	12	Haplotype_probs
25.4146	6.593	3.85479	HAPGRP_5	female_flowering_d6_NERAC_2016_WD_qDTS3_2	AX-91583302	AX-91583302	160518557	Haplotype_probs	12	Haplotype_probs
-15.6385	9.83567	-1.58998	HAPGRP_6	female_flowering_d6_NERAC_2016_WD_qDTS3_2	AX-91583302	AX-91583302	160518557	Haplotype_probs	12	Haplotype_probs
-13.4098	7.52624	-1.78174	HAPGRP_7	female_flowering_d6_NERAC_2016_WD_qDTS3_2	AX-91583302	AX-91583302	160518557	Haplotype_probs	12	Haplotype_probs
-0.89658	5.64702	-0.15877	HAPGRP_8	female_flowering_d6_NERAC_2016_WD_qDTS3_2	AX-91583302	AX-91583302	160518557	Haplotype_probs	12	Haplotype_probs
9.36391	11.0642	0.846325	HAPGRP_9	female_flowering_d6_NERAC_2016_WD_qDTS3_2	AX-91583302	AX-91583302	160518557	Haplotype_probs	12	Haplotype_probs
7.03481	4.61569	1.52411	HAPGRP_10	female_flowering_d6_NERAC_2016_WD_qDTS3_2	AX-91583302	AX-91583302	160518557	Haplotype_probs	12	Haplotype_probs
2.51658	7.22931	0.348109	HAPGRP_11	female_flowering_d6_NERAC_2016_WD_qDTS3_2	AX-91583302	AX-91583302	160518557	Haplotype_probs	12	Haplotype_probs
0.788223	7.94197	0.0992477	HAPGRP_12	female_flowering_d6_NERAC_2016_WD_qDTS3_2	AX-91583302	AX-91583302	160518557	Haplotype_probs	12	Haplotype_probs
-9.38257	4.60386	-2.03798	HAPGRP_1	female_flowering_d6_SZEGED_2017_OPT_qDTS3_2	AX-91383809	AX-90834177	157563421	Haplotype_probs	15	600K_SNP
-0.0703004	10.5025	-0.0066937	HAPGRP_2	female_flowering_d6_SZEGED_2017_OPT_qDTS3_2	AX-91383809	AX-90834177	157563421	Haplotype_probs	15	600K_SNP
-8.9093	7.38955	-1.20566	HAPGRP_3	female_flowering_d6_SZEGED_2017_OPT_qDTS3_2	AX-91383809	AX-90834177	157563421	Haplotype_probs	15	600K_SNP
-17.0192	7.99017	-2.13002	HAPGRP_4	female_flowering_d6_SZEGED_2017_OPT_qDTS3_2	AX-91383809	AX-90834177	157563421	Haplotype_probs	15	600K_SNP
11.2852	5.01883	2.24857	HAPGRP_5	female_flowering_d6_SZEGED_2017_OPT_qDTS3_2	AX-91383809	AX-90834177	157563421	Haplotype_probs	15	600K_SNP
-7.22207	7.96681	-0.90652	HAPGRP_6	female_flowering_d6_SZEGED_2017_OPT_qDTS3_2	AX-91383809	AX-90834177	157563421	Haplotype_probs	15	600K_SNP
-0.709594	5.3546	-0.13252	HAPGRP_7	female_flowering_d6_SZEGED_2017_OPT_qDTS3_2	AX-91383809	AX-90834177	157563421	Haplotype_probs	15	600K_SNP
-5.22367	5.73528	-0.910796	HAPGRP_8	female_flowering_d6_SZEGED_2017_OPT_qDTS3_2	AX-91383809	AX-90834177	157563421	Haplotype_probs	15	600K_SNP
-9.29195	6.00226	-1.54807	HAPGRP_9	female_flowering_d6_SZEGED_2017_OPT_qDTS3_2	AX-91383809	AX-90834177	157563421	Haplotype_probs	15	600K_SNP
2.62613	7.98669	0.328813	HAPGRP_10	female_flowering_d6_SZEGED_2017_OPT_qDTS3_2	AX-91383809	AX-90834177	157563421	Haplotype_probs	15	600K_SNP
16.9796	8.06155	2.10624	HAPGRP_11	female_flowering_d6_SZEGED_2017_OPT_qDTS3_2	AX-91383809	AX-90834177	157563421	Haplotype_probs	15	600K_SNP
25.0378	5.62982	4.44736	HAPGRP_12	female_flowering_d6_SZEGED_2017_OPT_qDTS3_2	AX-91383809	AX-90834177	157563421	Haplotype_probs	15	600K_SNP
2.29685	4.90009	0.468735	HAPGRP_13	female_flowering_d6_SZEGED_2017_OPT_qDTS3_2	AX-91383809	AX-90834177	157563421	Haplotype_probs	15	600K_SNP
4.43342	5.66516	0.782576	HAPGRP_14	female_flowering_d6_SZEGED_2017_OPT_qDTS3_2	AX-91383809	AX-90834177	157563421	Haplotype_probs	15	600K_SNP
-14.329	6.51931	-2.19794	HAPGRP_15	female_flowering_d6_SZEGED_2017_OPT_qDTS3_2	AX-91383809	AX-90834177	157563421	Haplotype_probs	15	600K_SNP
9.85829	4.04114	2.43948	HAPGRP_1	female_flowering_d6_SZEGED_2017_OPT_qDTS8	AX-91100991	AX-91100867	128360284	Haplotype_probs	15	600K_SNP
12.8056	7.16183	1.78803	HAPGRP_2	female_flowering_d6_SZEGED_2017_OPT_qDTS8	AX-91100991	AX-91100867	128360284	Haplotype_probs	15	600K_SNP
-4.24951	5.34507	-0.795033	HAPGRP_3	female_flowering_d6_SZEGED_2017_OPT_qDTS8	AX-91100991	AX-91100867	128360284	Haplotype_probs	15	600K_SNP
10.7186	6.40733	1.67287	HAPGRP_4	female_flowering_d6_SZEGED_2017_OPT_qDTS8	AX-91100991	AX-91100867	128360284	Haplotype_probs	15	600K_SNP
-6.56148	5.01677	-1.30791	HAPGRP_5	female_flowering_d6_SZEGED_2017_OPT_qDTS8	AX-91100991	AX-91100867	128360284	Haplotype_probs	15	600K_SNP
0.428125	5.54747	0.0771749	HAPGRP_6	female_flowering_d6_SZEGED_2017_OPT_qDTS8	AX-91100991	AX-91100867	128360284	Haplotype_probs	15	600K_SNP
0.906489	7.80302	0.116172	HAPGRP_7	female_flowering_d6_SZEGED_2017_OPT_qDTS8	AX-91100991	AX-91100867	128360284	Haplotype_probs	15	600K_SNP
-18.9101	7.28096	-2.5972	HAPGRP_8	female_flowering_d6_SZEGED_2017_OPT_qDTS8	AX-91100991	AX-91100867	128360284	Haplotype_probs	15	600K_SNP
-7.74771	5.0123	-1.54574	HAPGRP_9	female_flowering_d6_SZEGED_2017_OPT_qDTS8	AX-91100991	AX-91100867	128360284	Haplotype_probs	15	600K_SNP
-2.92854	6.07752	-0.481864	HAPGRP_10	female_flowering_d6_SZEGED_2017_OPT_qDTS8	AX-91100991	AX-91100867	128360284	Haplotype_probs	15	600K_SNP
23.8237	8.15942	2.91978	HAPGRP_11	female_flowering_d6_SZEGED_2017_OPT_qDTS8	AX-91100991	AX-91100867	128360284	Haplotype_probs	15	600K_SNP
-14.1948	6.30786	-2.25034	HAPGRP_12	female_flowering_d6_SZEGED_2017_OPT_qDTS8	AX-91100991	AX-91100867	128360284	Haplotype_probs	15	600K_SNP
5.93725	8.3624	0.709994	HAPGRP_13	female_flowering_d6_SZEGED_2017_OPT_qDTS8	AX-91100991	AX-91100867	128360284	Haplotype_probs	15	600K_SNP
-19.3703	7.03451	-2.75361	HAPGRP_14	female_flowering_d6_SZEGED_2017_OPT_qDTS8	AX-91100991	AX-91100867	128360284	Haplotype_probs	15	600K_SNP
13.7805	7.30741	1.88583	HAPGRP_15	female_flowering_d6_SZEGED_2017_OPT_qDTS8	AX-91100991	AX-91100867	128360284	Haplotype_probs	15	600K_SNP
-3.17411	7.34396	-0.432206	HAPGRP_1	female_flowering_d6_SZEGED_2017_OPT_qDTS3_2	AX-90834914	AX-90834914	160426458	Haplotype_probs	13	Founder_probs
8.17766	8.69721	0.940263	HAPGRP_2	female_flowering_d6_SZEGED_2017_OPT_qDTS3_2	AX-90834914	AX-90834914	160426458	Haplotype_probs	13	Founder_probs
-15.9907	4.67399	-3.42122	HAPGRP_3	female_flowering_d6_SZEGED_2017_OPT_qDTS3_2	AX-90834914	AX-90834914	160426458	Haplotype_probs	13	Founder_probs
-22.0787	7.89616	-2.79614	HAPGRP_4	female_flowering_d6_SZEGED_2017_OPT_qDTS3_2	AX-90834914	AX-90834914	160426458	Haplotype_probs	13	Founder_probs
15.839	5.15709	3.07131	HAPGRP_5	female_flowering_d6_SZEGED_2017_OPT_qDTS3_2	AX-90834914	AX-90834914	160426458	Haplotype_probs	13	Founder_probs
-9.21349	7.94445	-1.15974	HAPGRP_6	female_flowering_d6_SZEGED_2017_OPT_qDTS3_2	AX-90834914	AX-90834914	160426458	Haplotype_probs	13	Founder_probs
-1.17228	6.18188	-0.189631	HAPGRP_7	female_flowering_d6_SZEGED_2017_OPT_qDTS3_2	AX-90834914	AX-90834914	160426458	Haplotype_probs	13	Founder_probs
-0.644984	4.57665	-0.140929	HAPGRP_8	female_flowering_d6_SZEGED_2017_OPT_qDTS3_2	AX-90834914	AX-90834914	160426458	Haplotype_probs	13	Founder_probs
17.5771	8.0304	2.18882	HAPGRP_9	female_flowering_d6_SZEGED_2017_OPT_qDTS3_2	AX-90834914	AX-90834914	160426458	Haplotype_probs	13	Founder_probs
19.3872	4.97915	3.89367	HAPGRP_10	female_flowering_d6_SZEGED_2017_OPT_qDTS3_2	AX-90834914	AX-90834914	160426458	Haplotype_probs	13	Founder_probs
-1.52207	3.73366	-0.407662	HAPGRP_11	female_flowering_d6_SZEGED_2017_OPT_qDTS3_2	AX-90834914	AX-90834914	160426458	Haplotype_probs	13	Founder_probs
1.26183	5.70706	0.221099	HAPGRP_12	female_flowering_d6_SZEGED_2017_OPT_qDTS3_2	AX-90834914	AX-90834914	160426458	Haplotype_probs	13	Founder_probs
-12.9475	6.29643	-2.05633	HAPGRP_13	female_flowering_d6_SZEGED_2017_OPT_qDTS3_2	AX-90834914	AX-90834914	160426458	Haplotype_probs	13	Founder_probs
10.553	5.01517	2.10422	HAPGRP_1	female_flowering_d6_SZEGED_2017_OPT_qDTS8	AX-91106686	AX-91772263	149592078	Haplotype_probs	16	Founder_probs
9.65789	5.30928	1.81906	HAPGRP_2	female_flowering_d6_SZEGED_2017_OPT_qDTS8	AX-91106686	AX-91772263	149592078	Haplotype_probs	16	Founder_probs
-14.609	5.40467	-2.70304	HAPGRP_3	female_flowering_d6_SZEGED_2017_OPT_qDTS8	AX-91106686	AX-91772263	149592078	Haplotype_probs	16	Founder_probs
1.82714	5.70865	0.320065	HAPGRP_4	female_flowering_d6_SZEGED_2017_OPT_qDTS8	AX-91106686	AX-91772263	149592078	Haplotype_probs	16	Founder_probs
17.9379	6.71565	2.67105	HAPGRP_5	female_flowering_d6_SZEGED_2017_OPT_qDTS8	AX-91106686	AX-91772263	149592078	Haplotype_probs	16	Founder_probs
-5.20757	6.00803	-0.866768	HAPGRP_6	female_flowering_d6_SZEGED_2017_OPT_qDTS8	AX-91106686	AX-91772263	149592078	Haplotype_probs	16	Founder_probs
-2.34068	5.25173	-0.445696	HAPGRP_7	female_flowering_d6_SZEGED_2017_OPT_qDTS8	AX-91106686	AX-91772263	149592078	Haplotype_probs	16	Founder_probs
11.5362	7.61166	1.5156	HAPGRP_8	female_flowering_d6_SZEGED_2017_OPT_qDTS8	AX-91106686	AX-91772263	149592078	Haplotype_probs	16	Founder_probs
-29.9477	7.1857	-4.16768	HAPGRP_9	female_flowering_d6_SZEGED_2017_OPT_qDTS8	AX-91106686	AX-91772263	149592078	Haplotype_probs	16	Founder_probs
-10.8148	4.84124	-2.2339	HAPGRP_10	female_flowering_d6_SZEGED_2017_OPT_qDTS8	AX-91106686	AX-91772263	149592078	Haplotype_probs	16	Founder_probs
-6.66873	7.02804	-0.948874	HAPGRP_11	female_flowering_d6_SZEGED_2017_OPT_qDTS8	AX-91106686	AX-91772263	149592078	Haplotype_probs	16	Founder_probs
22.9435	10.2344	2.2418	HAPGRP_12	female_flowering_d6_SZEGED_2017_OPT_qDTS8	AX-91106686	AX-91772263	149592078	Haplotype_probs	16	Founder_probs
-1.48656	5.77329	-0.25749	HAPGRP_13	female_flowering_d6_SZEGED_2017_OPT_qDTS8	AX-91106686	AX-91772263	149592078	Haplotype_probs	16	Founder_probs
13.7879	8.98028	1.53535	HAPGRP_14	female_flowering_d6_SZEGED_2017_OPT_qDTS8	AX-91106686	AX-91772263	149592078	Haplotype_probs	16	Founder_probs
-7.65592	8.85958	-0.864141	HAPGRP_15	female_flowering_d6_SZEGED_2017_OPT_qDTS8	AX-91106686	AX-91772263	149592078	Haplotype_probs	16	Founder_probs
7.89974	6.07242	1.30092	HAPGRP_16	female_flowering_d6_SZEGED_2017_OPT_qDTS8	AX-91106686	AX-91772263	149592078	Haplotype_probs	16	Founder_probs
-3.17411	7.34396	-0.432206	HAPGRP_1	female_flowering_d6_SZEGED_2017_OPT_qDTS3_2	AX-90834914	AX-90834914	160426458	Haplotype_probs	13	Haplotype_probs
8.17766	8.69721	0.940263	HAPGRP_2	female_flowering_d6_SZEGED_2017_OPT_qDTS3_2	AX-90834914	AX-90834914	160426458	Haplotype_probs	13	Haplotype_probs
-15.9907	4.67399	-3.42122	HAPGRP_3	female_flowering_d6_SZEGED_2017_OPT_qDTS3_2	AX-90834914	AX-90834914	160426458	Haplotype_probs	13	Haplotype_probs
-22.0787	7.89616	-2.79614	HAPGRP_4	female_flowering_d6_SZEGED_2017_OPT_qDTS3_2	AX-90834914	AX-90834914	160426458	Haplotype_probs	13	Haplotype_probs
15.839	5.15709	3.07131	HAPGRP_5	female_flowering_d6_SZEGED_2017_OPT_qDTS3_2	AX-90834914	AX-90834914	160426458	Haplotype_probs	13	Haplotype_probs
-9.21349	7.94445	-1.15974	HAPGRP_6	female_flowering_d6_SZEGED_2017_OPT_qDTS3_2	AX-90834914	AX-90834914	160426458	Haplotype_probs	13	Haplotype_probs
-1.17228	6.18188	-0.189631	HAPGRP_7	female_flowering_d6_SZEGED_2017_OPT_qDTS3_2	AX-90834914	AX-90834914	160426458	Haplotype_probs	13	Haplotype_probs
-0.644984	4.57665	-0.140929	HAPGRP_8	female_flowering_d6_SZEGED_2017_OPT_qDTS3_2	AX-90834914	AX-90834914	160426458	Haplotype_probs	13	Haplotype_probs
17.5771	8.0304	2.18882	HAPGRP_9	female_flowering_d6_SZEGED_2017_OPT_qDTS3_2	AX-90834914	AX-90834914	160426458	Haplotype_probs	13	Haplotype_probs
19.3872	4.97915	3.89367	HAPGRP_10	female_flowering_d6_SZEGED_2017_OPT_qDTS3_2	AX-90834914	AX-90834914	160426458	Haplotype_probs	13	Haplotype_probs
-1.52207	3.73366	-0.407662	HAPGRP_11	female_flowering_d6_SZEGED_2017_OPT_qDTS3_2	AX-90834914	AX-90834914	160426458	Haplotype_probs	13	Haplotype_probs
1.26183	5.70706	0.221099	HAPGRP_12	female_flowering_d6_SZEGED_2017_OPT_qDTS3_2	AX-90834914	AX-90834914	160426458	Haplotype_probs	13	Haplotype_probs
-12.9475	6.29643	-2.05633	HAPGRP_13	female_flowering_d6_SZEGED_2017_OPT_qDTS3_2	AX-90834914	AX-90834914	160426458	Haplotype_probs	13	Haplotype_probs
8.964	5.05947	1.77173	HAPGRP_1	female_flowering_d6_SZEGED_2017_OPT_qDTS8	PZE-108085812	PZE-108085812	146992030	Haplotype_probs	13	Haplotype_probs
11.3238	5.53912	2.04434	HAPGRP_2	female_flowering_d6_SZEGED_2017_OPT_qDTS8	PZE-108085812	PZE-108085812	146992030	Haplotype_probs	13	Haplotype_probs
-10.5771	5.24061	-2.0183	HAPGRP_3	female_flowering_d6_SZEGED_2017_OPT_qDTS8	PZE-108085812	PZE-108085812	146992030	Haplotype_probs	13	Haplotype_probs
-3.45025	4.34489	-0.794094	HAPGRP_4	female_flowering_d6_SZEGED_2017_OPT_qDTS8	PZE-108085812	PZE-108085812	146992030	Haplotype_probs	13	Haplotype_probs
19.6221	6.32056	3.10449	HAPGRP_5	female_flowering_d6_SZEGED_2017_OPT_qDTS8	PZE-108085812	PZE-108085812	146992030	Haplotype_probs	13	Haplotype_probs
-4.56843	3.76914	-1.21206	HAPGRP_6	female_flowering_d6_SZEGED_2017_OPT_qDTS8	PZE-108085812	PZE-108085812	146992030	Haplotype_probs	13	Haplotype_probs
-4.59702	6.00472	-0.765569	HAPGRP_7	female_flowering_d6_SZEGED_2017_OPT_qDTS8	PZE-108085812	PZE-108085812	146992030	Haplotype_probs	13	Haplotype_probs
6.42044	7.0493	0.910792	HAPGRP_8	female_flowering_d6_SZEGED_2017_OPT_qDTS8	PZE-108085812	PZE-108085812	146992030	Haplotype_probs	13	Haplotype_probs
-27.9704	6.95504	-4.0216	HAPGRP_9	female_flowering_d6_SZEGED_2017_OPT_qDTS8	PZE-108085812	PZE-108085812	146992030	Haplotype_probs	13	Haplotype_probs
-10.7037	5.06899	-2.1116	HAPGRP_10	female_flowering_d6_SZEGED_2017_OPT_qDTS8	PZE-108085812	PZE-108085812	146992030	Haplotype_probs	13	Haplotype_probs
23.1404	10.2361	2.26067	HAPGRP_11	female_flowering_d6_SZEGED_2017_OPT_qDTS8	PZE-108085812	PZE-108085812	146992030	Haplotype_probs	13	Haplotype_probs
11.486	5.01971	2.28818	HAPGRP_12	female_flowering_d6_SZEGED_2017_OPT_qDTS8	PZE-108085812	PZE-108085812	146992030	Haplotype_probs	13	Haplotype_probs
-6.70445	9.4071	-0.712701	HAPGRP_13	female_flowering_d6_SZEGED_2017_OPT_qDTS8	PZE-108085812	PZE-108085812	146992030	Haplotype_probs	13	Haplotype_probs
-1.56155	2.59091	-0.602704	HAPGRP_1	grain_yield_15_STPAUL_2017_WD_qGYD1_1	AX-91465366	AX-90667406	64728836	Haplotype_probs	15	600K_SNP
-2.52664	1.55753	-1.6222	HAPGRP_2	grain_yield_15_STPAUL_2017_WD_qGYD1_1	AX-91465366	AX-90667406	64728836	Haplotype_probs	15	600K_SNP
-6.5407	2.29445	-2.85066	HAPGRP_3	grain_yield_15_STPAUL_2017_WD_qGYD1_1	AX-91465366	AX-90667406	64728836	Haplotype_probs	15	600K_SNP
-4.61992	2.19325	-2.10642	HAPGRP_4	grain_yield_15_STPAUL_2017_WD_qGYD1_1	AX-91465366	AX-90667406	64728836	Haplotype_probs	15	600K_SNP
0.167156	2.34645	0.0712378	HAPGRP_5	grain_yield_15_STPAUL_2017_WD_qGYD1_1	AX-91465366	AX-90667406	64728836	Haplotype_probs	15	600K_SNP
-0.315062	2.11153	-0.14921	HAPGRP_6	grain_yield_15_STPAUL_2017_WD_qGYD1_1	AX-91465366	AX-90667406	64728836	Haplotype_probs	15	600K_SNP
5.9387	2.26945	2.61681	HAPGRP_7	grain_yield_15_STPAUL_2017_WD_qGYD1_1	AX-91465366	AX-90667406	64728836	Haplotype_probs	15	600K_SNP
6.25445	2.15436	2.90316	HAPGRP_8	grain_yield_15_STPAUL_2017_WD_qGYD1_1	AX-91465366	AX-90667406	64728836	Haplotype_probs	15	600K_SNP
-0.86272	1.87278	-0.460664	HAPGRP_9	grain_yield_15_STPAUL_2017_WD_qGYD1_1	AX-91465366	AX-90667406	64728836	Haplotype_probs	15	600K_SNP
2.91723	1.80547	1.61578	HAPGRP_10	grain_yield_15_STPAUL_2017_WD_qGYD1_1	AX-91465366	AX-90667406	64728836	Haplotype_probs	15	600K_SNP
5.93089	3.00402	1.97431	HAPGRP_11	grain_yield_15_STPAUL_2017_WD_qGYD1_1	AX-91465366	AX-90667406	64728836	Haplotype_probs	15	600K_SNP
-0.961976	1.99814	-0.481435	HAPGRP_12	grain_yield_15_STPAUL_2017_WD_qGYD1_1	AX-91465366	AX-90667406	64728836	Haplotype_probs	15	600K_SNP
0.0470108	1.91149	0.0245938	HAPGRP_13	grain_yield_15_STPAUL_2017_WD_qGYD1_1	AX-91465366	AX-90667406	64728836	Haplotype_probs	15	600K_SNP
-2.57349	1.9795	-1.30007	HAPGRP_14	grain_yield_15_STPAUL_2017_WD_qGYD1_1	AX-91465366	AX-90667406	64728836	Haplotype_probs	15	600K_SNP
5.55213	3.53647	1.56996	HAPGRP_15	grain_yield_15_STPAUL_2017_WD_qGYD1_1	AX-91465366	AX-90667406	64728836	Haplotype_probs	15	600K_SNP
2.10033	1.43077	1.46797	HAPGRP_1	grain_yield_15_STPAUL_2017_WD_qGYD1_2	AX-91439687	AX-91485116	173401292	Haplotype_probs	12	600K_SNP
1.83462	1.64509	1.11521	HAPGRP_2	grain_yield_15_STPAUL_2017_WD_qGYD1_2	AX-91439687	AX-91485116	173401292	Haplotype_probs	12	600K_SNP
-0.325523	1.90453	-0.170921	HAPGRP_3	grain_yield_15_STPAUL_2017_WD_qGYD1_2	AX-91439687	AX-91485116	173401292	Haplotype_probs	12	600K_SNP
1.4439	2.0376	0.708626	HAPGRP_4	grain_yield_15_STPAUL_2017_WD_qGYD1_2	AX-91439687	AX-91485116	173401292	Haplotype_probs	12	600K_SNP
-1.99284	2.1502	-0.926818	HAPGRP_5	grain_yield_15_STPAUL_2017_WD_qGYD1_2	AX-91439687	AX-91485116	173401292	Haplotype_probs	12	600K_SNP
1.92407	1.88	1.02345	HAPGRP_6	grain_yield_15_STPAUL_2017_WD_qGYD1_2	AX-91439687	AX-91485116	173401292	Haplotype_probs	12	600K_SNP
-7.28678	1.91108	-3.81292	HAPGRP_7	grain_yield_15_STPAUL_2017_WD_qGYD1_2	AX-91439687	AX-91485116	173401292	Haplotype_probs	12	600K_SNP
1.41414	1.5636	0.904418	HAPGRP_8	grain_yield_15_STPAUL_2017_WD_qGYD1_2	AX-91439687	AX-91485116	173401292	Haplotype_probs	12	600K_SNP
2.15218	2.37103	0.907699	HAPGRP_9	grain_yield_15_STPAUL_2017_WD_qGYD1_2	AX-91439687	AX-91485116	173401292	Haplotype_probs	12	600K_SNP
-0.386558	2.09973	-0.184099	HAPGRP_10	grain_yield_15_STPAUL_2017_WD_qGYD1_2	AX-91439687	AX-91485116	173401292	Haplotype_probs	12	600K_SNP
0.502016	2.096	0.239512	HAPGRP_11	grain_yield_15_STPAUL_2017_WD_qGYD1_2	AX-91439687	AX-91485116	173401292	Haplotype_probs	12	600K_SNP
-8.39586	2.61363	-3.21234	HAPGRP_12	grain_yield_15_STPAUL_2017_WD_qGYD1_2	AX-91439687	AX-91485116	173401292	Haplotype_probs	12	600K_SNP
-2.29961	2.87158	-0.800816	HAPGRP_1	grain_yield_15_STPAUL_2017_WD_qGYD5	PZE-105031901	AX-91222349	18196101	Haplotype_probs	14	600K_SNP
5.24056	2.1736	2.411	HAPGRP_2	grain_yield_15_STPAUL_2017_WD_qGYD5	PZE-105031901	AX-91222349	18196101	Haplotype_probs	14	600K_SNP
-4.00147	1.53888	-2.60024	HAPGRP_3	grain_yield_15_STPAUL_2017_WD_qGYD5	PZE-105031901	AX-91222349	18196101	Haplotype_probs	14	600K_SNP
-0.748773	1.69446	-0.441895	HAPGRP_4	grain_yield_15_STPAUL_2017_WD_qGYD5	PZE-105031901	AX-91222349	18196101	Haplotype_probs	14	600K_SNP
4.69644	2.63193	1.78441	HAPGRP_5	grain_yield_15_STPAUL_2017_WD_qGYD5	PZE-105031901	AX-91222349	18196101	Haplotype_probs	14	600K_SNP
-2.45672	1.78702	-1.37476	HAPGRP_6	grain_yield_15_STPAUL_2017_WD_qGYD5	PZE-105031901	AX-91222349	18196101	Haplotype_probs	14	600K_SNP
5.26859	2.2985	2.29218	HAPGRP_7	grain_yield_15_STPAUL_2017_WD_qGYD5	PZE-105031901	AX-91222349	18196101	Haplotype_probs	14	600K_SNP
3.99588	2.7494	1.45336	HAPGRP_8	grain_yield_15_STPAUL_2017_WD_qGYD5	PZE-105031901	AX-91222349	18196101	Haplotype_probs	14	600K_SNP
-2.35341	1.84162	-1.2779	HAPGRP_9	grain_yield_15_STPAUL_2017_WD_qGYD5	PZE-105031901	AX-91222349	18196101	Haplotype_probs	14	600K_SNP
-2.35489	2.38688	-0.986597	HAPGRP_10	grain_yield_15_STPAUL_2017_WD_qGYD5	PZE-105031901	AX-91222349	18196101	Haplotype_probs	14	600K_SNP
0.606782	2.11542	0.286838	HAPGRP_11	grain_yield_15_STPAUL_2017_WD_qGYD5	PZE-105031901	AX-91222349	18196101	Haplotype_probs	14	600K_SNP
-1.19445	2.02753	-0.589115	HAPGRP_12	grain_yield_15_STPAUL_2017_WD_qGYD5	PZE-105031901	AX-91222349	18196101	Haplotype_probs	14	600K_SNP
5.02046	1.87542	2.67697	HAPGRP_13	grain_yield_15_STPAUL_2017_WD_qGYD5	PZE-105031901	AX-91222349	18196101	Haplotype_probs	14	600K_SNP
-4.98131	2.72001	-1.83136	HAPGRP_14	grain_yield_15_STPAUL_2017_WD_qGYD5	PZE-105031901	AX-91222349	18196101	Haplotype_probs	14	600K_SNP
-0.302525	0.133814	-2.26079	HAPGRP_1	harvest_grain_moisture_ALL_qHGM3_2	AX-90830981	AX-90830868	143969848	Haplotype_probs	13	600K_SNP
-0.210939	0.152678	-1.3816	HAPGRP_2	harvest_grain_moisture_ALL_qHGM3_2	AX-90830981	AX-90830868	143969848	Haplotype_probs	13	600K_SNP
-0.466981	0.206746	-2.25872	HAPGRP_3	harvest_grain_moisture_ALL_qHGM3_2	AX-90830981	AX-90830868	143969848	Haplotype_probs	13	600K_SNP
0.51078	0.152589	3.34742	HAPGRP_4	harvest_grain_moisture_ALL_qHGM3_2	AX-90830981	AX-90830868	143969848	Haplotype_probs	13	600K_SNP
-0.038173	0.122175	-0.312444	HAPGRP_5	harvest_grain_moisture_ALL_qHGM3_2	AX-90830981	AX-90830868	143969848	Haplotype_probs	13	600K_SNP
0.0476036	0.156924	0.303355	HAPGRP_6	harvest_grain_moisture_ALL_qHGM3_2	AX-90830981	AX-90830868	143969848	Haplotype_probs	13	600K_SNP
-0.0606398	0.21154	-0.286659	HAPGRP_7	harvest_grain_moisture_ALL_qHGM3_2	AX-90830981	AX-90830868	143969848	Haplotype_probs	13	600K_SNP
0.362758	0.253195	1.43272	HAPGRP_8	harvest_grain_moisture_ALL_qHGM3_2	AX-90830981	AX-90830868	143969848	Haplotype_probs	13	600K_SNP
0.440709	0.163648	2.69303	HAPGRP_9	harvest_grain_moisture_ALL_qHGM3_2	AX-90830981	AX-90830868	143969848	Haplotype_probs	13	600K_SNP
-0.0931411	0.135132	-0.689258	HAPGRP_10	harvest_grain_moisture_ALL_qHGM3_2	AX-90830981	AX-90830868	143969848	Haplotype_probs	13	600K_SNP
0.229902	0.173761	1.3231	HAPGRP_11	harvest_grain_moisture_ALL_qHGM3_2	AX-90830981	AX-90830868	143969848	Haplotype_probs	13	600K_SNP
-0.394484	0.164393	-2.39964	HAPGRP_12	harvest_grain_moisture_ALL_qHGM3_2	AX-90830981	AX-90830868	143969848	Haplotype_probs	13	600K_SNP
0.218316	0.185983	1.17385	HAPGRP_13	harvest_grain_moisture_ALL_qHGM3_2	AX-90830981	AX-90830868	143969848	Haplotype_probs	13	600K_SNP
0.139811	0.157697	0.88658	HAPGRP_1	harvest_grain_moisture_ALL_qHGM3_1	AX-90799820	AX-90799785	22276352	Haplotype_probs	13	Founder_probs
-0.67784	0.20983	-3.23043	HAPGRP_2	harvest_grain_moisture_ALL_qHGM3_1	AX-90799820	AX-90799785	22276352	Haplotype_probs	13	Founder_probs
-0.177909	0.216296	-0.822526	HAPGRP_3	harvest_grain_moisture_ALL_qHGM3_1	AX-90799820	AX-90799785	22276352	Haplotype_probs	13	Founder_probs
0.0823395	0.122015	0.674829	HAPGRP_4	harvest_grain_moisture_ALL_qHGM3_1	AX-90799820	AX-90799785	22276352	Haplotype_probs	13	Founder_probs
-0.254856	0.117704	-2.16522	HAPGRP_5	harvest_grain_moisture_ALL_qHGM3_1	AX-90799820	AX-90799785	22276352	Haplotype_probs	13	Founder_probs
0.236698	0.150643	1.57125	HAPGRP_6	harvest_grain_moisture_ALL_qHGM3_1	AX-90799820	AX-90799785	22276352	Haplotype_probs	13	Founder_probs
0.149727	0.176282	0.84936	HAPGRP_7	harvest_grain_moisture_ALL_qHGM3_1	AX-90799820	AX-90799785	22276352	Haplotype_probs	13	Founder_probs
-0.282594	0.196263	-1.43987	HAPGRP_8	harvest_grain_moisture_ALL_qHGM3_1	AX-90799820	AX-90799785	22276352	Haplotype_probs	13	Founder_probs
-0.0288749	0.176051	-0.164015	HAPGRP_9	harvest_grain_moisture_ALL_qHGM3_1	AX-90799820	AX-90799785	22276352	Haplotype_probs	13	Founder_probs
0.173505	0.234113	0.741119	HAPGRP_10	harvest_grain_moisture_ALL_qHGM3_1	AX-90799820	AX-90799785	22276352	Haplotype_probs	13	Founder_probs
0.727251	0.173868	4.18277	HAPGRP_11	harvest_grain_moisture_ALL_qHGM3_1	AX-90799820	AX-90799785	22276352	Haplotype_probs	13	Founder_probs
0.0577116	0.145818	0.395777	HAPGRP_12	harvest_grain_moisture_ALL_qHGM3_1	AX-90799820	AX-90799785	22276352	Haplotype_probs	13	Founder_probs
-0.272693	0.156735	-1.73984	HAPGRP_13	harvest_grain_moisture_ALL_qHGM3_1	AX-90799820	AX-90799785	22276352	Haplotype_probs	13	Founder_probs
-0.354424	0.122485	-2.89362	HAPGRP_1	harvest_grain_moisture_ALL_qHGM3_2	PZE-103084819	PZE-103084819	141333098	Haplotype_probs	14	Founder_probs
-0.554325	0.196776	-2.81704	HAPGRP_2	harvest_grain_moisture_ALL_qHGM3_2	PZE-103084819	PZE-103084819	141333098	Haplotype_probs	14	Founder_probs
-0.159097	0.215547	-0.738111	HAPGRP_3	harvest_grain_moisture_ALL_qHGM3_2	PZE-103084819	PZE-103084819	141333098	Haplotype_probs	14	Founder_probs
0.506352	0.150927	3.35495	HAPGRP_4	harvest_grain_moisture_ALL_qHGM3_2	PZE-103084819	PZE-103084819	141333098	Haplotype_probs	14	Founder_probs
0.102836	0.15856	0.648562	HAPGRP_5	harvest_grain_moisture_ALL_qHGM3_2	PZE-103084819	PZE-103084819	141333098	Haplotype_probs	14	Founder_probs
0.0876307	0.151833	0.577153	HAPGRP_6	harvest_grain_moisture_ALL_qHGM3_2	PZE-103084819	PZE-103084819	141333098	Haplotype_probs	14	Founder_probs
-0.202548	0.190978	-1.06058	HAPGRP_7	harvest_grain_moisture_ALL_qHGM3_2	PZE-103084819	PZE-103084819	141333098	Haplotype_probs	14	Founder_probs
0.0407219	0.226713	0.179619	HAPGRP_8	harvest_grain_moisture_ALL_qHGM3_2	PZE-103084819	PZE-103084819	141333098	Haplotype_probs	14	Founder_probs
0.331929	0.27384	1.21213	HAPGRP_9	harvest_grain_moisture_ALL_qHGM3_2	PZE-103084819	PZE-103084819	141333098	Haplotype_probs	14	Founder_probs
0.431416	0.158081	2.72909	HAPGRP_10	harvest_grain_moisture_ALL_qHGM3_2	PZE-103084819	PZE-103084819	141333098	Haplotype_probs	14	Founder_probs
-0.0838041	0.135494	-0.618507	HAPGRP_11	harvest_grain_moisture_ALL_qHGM3_2	PZE-103084819	PZE-103084819	141333098	Haplotype_probs	14	Founder_probs
0.283437	0.175499	1.61504	HAPGRP_12	harvest_grain_moisture_ALL_qHGM3_2	PZE-103084819	PZE-103084819	141333098	Haplotype_probs	14	Founder_probs
-0.411967	0.169168	-2.43526	HAPGRP_13	harvest_grain_moisture_ALL_qHGM3_2	PZE-103084819	PZE-103084819	141333098	Haplotype_probs	14	Founder_probs
0.265336	0.193796	1.36915	HAPGRP_14	harvest_grain_moisture_ALL_qHGM3_2	PZE-103084819	PZE-103084819	141333098	Haplotype_probs	14	Founder_probs
-0.275482	0.10769	-2.55811	HAPGRP_1	harvest_grain_moisture_ALL_qHGM3_2	AX-91579535	AX-91579535	138469858	Haplotype_probs	13	Haplotype_probs
-0.364428	0.286708	-1.27108	HAPGRP_2	harvest_grain_moisture_ALL_qHGM3_2	AX-91579535	AX-91579535	138469858	Haplotype_probs	13	Haplotype_probs
-0.559269	0.197232	-2.83559	HAPGRP_3	harvest_grain_moisture_ALL_qHGM3_2	AX-91579535	AX-91579535	138469858	Haplotype_probs	13	Haplotype_probs
0.523516	0.153902	3.40163	HAPGRP_4	harvest_grain_moisture_ALL_qHGM3_2	AX-91579535	AX-91579535	138469858	Haplotype_probs	13	Haplotype_probs
0.157997	0.161029	0.98117	HAPGRP_5	harvest_grain_moisture_ALL_qHGM3_2	AX-91579535	AX-91579535	138469858	Haplotype_probs	13	Haplotype_probs
0.047666	0.145728	0.327089	HAPGRP_6	harvest_grain_moisture_ALL_qHGM3_2	AX-91579535	AX-91579535	138469858	Haplotype_probs	13	Haplotype_probs
-0.13978	0.143349	-0.975099	HAPGRP_7	harvest_grain_moisture_ALL_qHGM3_2	AX-91579535	AX-91579535	138469858	Haplotype_probs	13	Haplotype_probs
0.359253	0.250251	1.43557	HAPGRP_8	harvest_grain_moisture_ALL_qHGM3_2	AX-91579535	AX-91579535	138469858	Haplotype_probs	13	Haplotype_probs
0.411608	0.154959	2.65624	HAPGRP_9	harvest_grain_moisture_ALL_qHGM3_2	AX-91579535	AX-91579535	138469858	Haplotype_probs	13	Haplotype_probs
-0.0853106	0.135449	-0.629838	HAPGRP_10	harvest_grain_moisture_ALL_qHGM3_2	AX-91579535	AX-91579535	138469858	Haplotype_probs	13	Haplotype_probs
0.25609	0.175586	1.45849	HAPGRP_11	harvest_grain_moisture_ALL_qHGM3_2	AX-91579535	AX-91579535	138469858	Haplotype_probs	13	Haplotype_probs
-0.423873	0.159199	-2.66253	HAPGRP_12	harvest_grain_moisture_ALL_qHGM3_2	AX-91579535	AX-91579535	138469858	Haplotype_probs	13	Haplotype_probs
0.330427	0.200609	1.64712	HAPGRP_13	harvest_grain_moisture_ALL_qHGM3_2	AX-91579535	AX-91579535	138469858	Haplotype_probs	13	Haplotype_probs
0.18883	0.132596	1.42411	HAPGRP_1	harvest_grain_moisture_BLOIS_2014_OPT_qHGM3_1	AX-91556625	AX-91407883	16418140	Haplotype_probs	12	600K_SNP
0.131528	0.274921	0.478419	HAPGRP_2	harvest_grain_moisture_BLOIS_2014_OPT_qHGM3_1	AX-91556625	AX-91407883	16418140	Haplotype_probs	12	600K_SNP
-0.341237	0.115602	-2.95181	HAPGRP_3	harvest_grain_moisture_BLOIS_2014_OPT_qHGM3_1	AX-91556625	AX-91407883	16418140	Haplotype_probs	12	600K_SNP
-0.184986	0.239574	-0.772144	HAPGRP_4	harvest_grain_moisture_BLOIS_2014_OPT_qHGM3_1	AX-91556625	AX-91407883	16418140	Haplotype_probs	12	600K_SNP
0.255797	0.177527	1.44089	HAPGRP_5	harvest_grain_moisture_BLOIS_2014_OPT_qHGM3_1	AX-91556625	AX-91407883	16418140	Haplotype_probs	12	600K_SNP
0.203751	0.164798	1.23636	HAPGRP_6	harvest_grain_moisture_BLOIS_2014_OPT_qHGM3_1	AX-91556625	AX-91407883	16418140	Haplotype_probs	12	600K_SNP
0.000271105	0.180217	0.00150432	HAPGRP_7	harvest_grain_moisture_BLOIS_2014_OPT_qHGM3_1	AX-91556625	AX-91407883	16418140	Haplotype_probs	12	600K_SNP
-0.398265	0.172467	-2.30922	HAPGRP_8	harvest_grain_moisture_BLOIS_2014_OPT_qHGM3_1	AX-91556625	AX-91407883	16418140	Haplotype_probs	12	600K_SNP
0.229358	0.123274	1.86056	HAPGRP_9	harvest_grain_moisture_BLOIS_2014_OPT_qHGM3_1	AX-91556625	AX-91407883	16418140	Haplotype_probs	12	600K_SNP
0.654787	0.214241	3.05631	HAPGRP_10	harvest_grain_moisture_BLOIS_2014_OPT_qHGM3_1	AX-91556625	AX-91407883	16418140	Haplotype_probs	12	600K_SNP
-0.247321	0.164987	-1.49903	HAPGRP_11	harvest_grain_moisture_BLOIS_2014_OPT_qHGM3_1	AX-91556625	AX-91407883	16418140	Haplotype_probs	12	600K_SNP
-0.204854	0.179102	-1.14378	HAPGRP_12	harvest_grain_moisture_BLOIS_2014_OPT_qHGM3_1	AX-91556625	AX-91407883	16418140	Haplotype_probs	12	600K_SNP
-0.0546966	0.25386	-0.21546	HAPGRP_1	harvest_grain_moisture_GRANEROS_2015_OPT_qHGM2	AX-90784366	AX-90784366	210205273	Haplotype_probs	14	Founder_probs
0.139492	0.194136	0.718531	HAPGRP_2	harvest_grain_moisture_GRANEROS_2015_OPT_qHGM2	AX-90784366	AX-90784366	210205273	Haplotype_probs	14	Founder_probs
0.0936638	0.119575	0.783307	HAPGRP_3	harvest_grain_moisture_GRANEROS_2015_OPT_qHGM2	AX-90784366	AX-90784366	210205273	Haplotype_probs	14	Founder_probs
-0.318976	0.18493	-1.72485	HAPGRP_4	harvest_grain_moisture_GRANEROS_2015_OPT_qHGM2	AX-90784366	AX-90784366	210205273	Haplotype_probs	14	Founder_probs
-0.246921	0.161814	-1.52596	HAPGRP_5	harvest_grain_moisture_GRANEROS_2015_OPT_qHGM2	AX-90784366	AX-90784366	210205273	Haplotype_probs	14	Founder_probs
-0.276973	0.113163	-2.44757	HAPGRP_6	harvest_grain_moisture_GRANEROS_2015_OPT_qHGM2	AX-90784366	AX-90784366	210205273	Haplotype_probs	14	Founder_probs
0.365862	0.29337	1.2471	HAPGRP_7	harvest_grain_moisture_GRANEROS_2015_OPT_qHGM2	AX-90784366	AX-90784366	210205273	Haplotype_probs	14	Founder_probs
0.629173	0.224928	2.79721	HAPGRP_8	harvest_grain_moisture_GRANEROS_2015_OPT_qHGM2	AX-90784366	AX-90784366	210205273	Haplotype_probs	14	Founder_probs
-0.0613473	0.192068	-0.319404	HAPGRP_9	harvest_grain_moisture_GRANEROS_2015_OPT_qHGM2	AX-90784366	AX-90784366	210205273	Haplotype_probs	14	Founder_probs
-0.283548	0.184799	-1.53435	HAPGRP_10	harvest_grain_moisture_GRANEROS_2015_OPT_qHGM2	AX-90784366	AX-90784366	210205273	Haplotype_probs	14	Founder_probs
5.20478	2.40432	2.16476	HAPGRP_11	harvest_grain_moisture_GRANEROS_2015_OPT_qHGM2	AX-90784366	AX-90784366	210205273	Haplotype_probs	14	Founder_probs
0.328478	0.128082	2.56458	HAPGRP_12	harvest_grain_moisture_GRANEROS_2015_OPT_qHGM2	AX-90784366	AX-90784366	210205273	Haplotype_probs	14	Founder_probs
0.127785	0.145207	0.880024	HAPGRP_13	harvest_grain_moisture_GRANEROS_2015_OPT_qHGM2	AX-90784366	AX-90784366	210205273	Haplotype_probs	14	Founder_probs
-0.249507	0.152867	-1.63218	HAPGRP_14	harvest_grain_moisture_GRANEROS_2015_OPT_qHGM2	AX-90784366	AX-90784366	210205273	Haplotype_probs	14	Founder_probs
4.51161	4.97836	0.906245	HAPGRP_1	male_flowering_d6_ALL_qDTA3_2	AX-90835099	AX-91583440	161296968	Haplotype_probs	16	600K_SNP
-3.59883	6.12877	-0.587203	HAPGRP_2	male_flowering_d6_ALL_qDTA3_2	AX-90835099	AX-91583440	161296968	Haplotype_probs	16	600K_SNP
-11.2957	4.88446	-2.31258	HAPGRP_3	male_flowering_d6_ALL_qDTA3_2	AX-90835099	AX-91583440	161296968	Haplotype_probs	16	600K_SNP
-17.7869	5.56999	-3.19334	HAPGRP_4	male_flowering_d6_ALL_qDTA3_2	AX-90835099	AX-91583440	161296968	Haplotype_probs	16	600K_SNP
13.231	3.77095	3.50865	HAPGRP_5	male_flowering_d6_ALL_qDTA3_2	AX-90835099	AX-91583440	161296968	Haplotype_probs	16	600K_SNP
-3.75314	5.66914	-0.662029	HAPGRP_6	male_flowering_d6_ALL_qDTA3_2	AX-90835099	AX-91583440	161296968	Haplotype_probs	16	600K_SNP
-6.73044	4.39409	-1.5317	HAPGRP_7	male_flowering_d6_ALL_qDTA3_2	AX-90835099	AX-91583440	161296968	Haplotype_probs	16	600K_SNP
2.98715	3.92202	0.761635	HAPGRP_8	male_flowering_d6_ALL_qDTA3_2	AX-90835099	AX-91583440	161296968	Haplotype_probs	16	600K_SNP
-19.5791	4.38342	-4.46662	HAPGRP_9	male_flowering_d6_ALL_qDTA3_2	AX-90835099	AX-91583440	161296968	Haplotype_probs	16	600K_SNP
-6.76054	5.39033	-1.2542	HAPGRP_10	male_flowering_d6_ALL_qDTA3_2	AX-90835099	AX-91583440	161296968	Haplotype_probs	16	600K_SNP
-1.22687	6.25574	-0.19612	HAPGRP_11	male_flowering_d6_ALL_qDTA3_2	AX-90835099	AX-91583440	161296968	Haplotype_probs	16	600K_SNP
19.4862	3.6074	5.40173	HAPGRP_12	male_flowering_d6_ALL_qDTA3_2	AX-90835099	AX-91583440	161296968	Haplotype_probs	16	600K_SNP
3.79639	3.34775	1.13401	HAPGRP_13	male_flowering_d6_ALL_qDTA3_2	AX-90835099	AX-91583440	161296968	Haplotype_probs	16	600K_SNP
1.18337	4.04317	0.292684	HAPGRP_14	male_flowering_d6_ALL_qDTA3_2	AX-90835099	AX-91583440	161296968	Haplotype_probs	16	600K_SNP
-2.74516	4.42704	-0.62009	HAPGRP_15	male_flowering_d6_ALL_qDTA3_2	AX-90835099	AX-91583440	161296968	Haplotype_probs	16	600K_SNP
-2.17721	4.6239	-0.470861	HAPGRP_16	male_flowering_d6_ALL_qDTA3_2	AX-90835099	AX-91583440	161296968	Haplotype_probs	16	600K_SNP
11.5222	2.82121	4.08414	HAPGRP_1	male_flowering_d6_ALL_qDTA8	AX-91100991	AX-91100867	128360284	Haplotype_probs	15	600K_SNP
6.55898	5.24766	1.24989	HAPGRP_2	male_flowering_d6_ALL_qDTA8	AX-91100991	AX-91100867	128360284	Haplotype_probs	15	600K_SNP
-5.07064	3.54923	-1.42866	HAPGRP_3	male_flowering_d6_ALL_qDTA8	AX-91100991	AX-91100867	128360284	Haplotype_probs	15	600K_SNP
9.87971	4.17995	2.36359	HAPGRP_4	male_flowering_d6_ALL_qDTA8	AX-91100991	AX-91100867	128360284	Haplotype_probs	15	600K_SNP
-7.42418	3.38872	-2.19085	HAPGRP_5	male_flowering_d6_ALL_qDTA8	AX-91100991	AX-91100867	128360284	Haplotype_probs	15	600K_SNP
-2.76667	3.84544	-0.719468	HAPGRP_6	male_flowering_d6_ALL_qDTA8	AX-91100991	AX-91100867	128360284	Haplotype_probs	15	600K_SNP
6.2698	5.37267	1.16698	HAPGRP_7	male_flowering_d6_ALL_qDTA8	AX-91100991	AX-91100867	128360284	Haplotype_probs	15	600K_SNP
-16.6832	4.9181	-3.3922	HAPGRP_8	male_flowering_d6_ALL_qDTA8	AX-91100991	AX-91100867	128360284	Haplotype_probs	15	600K_SNP
-8.66178	3.66027	-2.36643	HAPGRP_9	male_flowering_d6_ALL_qDTA8	AX-91100991	AX-91100867	128360284	Haplotype_probs	15	600K_SNP
0.0180633	4.27068	0.00422962	HAPGRP_10	male_flowering_d6_ALL_qDTA8	AX-91100991	AX-91100867	128360284	Haplotype_probs	15	600K_SNP
18.1064	5.84234	3.09917	HAPGRP_11	male_flowering_d6_ALL_qDTA8	AX-91100991	AX-91100867	128360284	Haplotype_probs	15	600K_SNP
-16.1143	4.61248	-3.49363	HAPGRP_12	male_flowering_d6_ALL_qDTA8	AX-91100991	AX-91100867	128360284	Haplotype_probs	15	600K_SNP
7.69928	6.15773	1.25034	HAPGRP_13	male_flowering_d6_ALL_qDTA8	AX-91100991	AX-91100867	128360284	Haplotype_probs	15	600K_SNP
-14.8674	5.07256	-2.93095	HAPGRP_14	male_flowering_d6_ALL_qDTA8	AX-91100991	AX-91100867	128360284	Haplotype_probs	15	600K_SNP
18.225	5.11816	3.56085	HAPGRP_15	male_flowering_d6_ALL_qDTA8	AX-91100991	AX-91100867	128360284	Haplotype_probs	15	600K_SNP
4.46166	5.14024	0.867987	HAPGRP_1	male_flowering_d6_ALL_qDTA3_2	AX-90834914	AX-90834914	160426458	Haplotype_probs	13	Founder_probs
-0.606673	6.14599	-0.0987104	HAPGRP_2	male_flowering_d6_ALL_qDTA3_2	AX-90834914	AX-90834914	160426458	Haplotype_probs	13	Founder_probs
-17.4163	3.27421	-5.31925	HAPGRP_3	male_flowering_d6_ALL_qDTA3_2	AX-90834914	AX-90834914	160426458	Haplotype_probs	13	Founder_probs
-17.8021	5.58603	-3.1869	HAPGRP_4	male_flowering_d6_ALL_qDTA3_2	AX-90834914	AX-90834914	160426458	Haplotype_probs	13	Founder_probs
12.919	3.64607	3.54328	HAPGRP_5	male_flowering_d6_ALL_qDTA3_2	AX-90834914	AX-90834914	160426458	Haplotype_probs	13	Founder_probs
-3.60266	5.68223	-0.634022	HAPGRP_6	male_flowering_d6_ALL_qDTA3_2	AX-90834914	AX-90834914	160426458	Haplotype_probs	13	Founder_probs
-6.90198	4.40738	-1.56601	HAPGRP_7	male_flowering_d6_ALL_qDTA3_2	AX-90834914	AX-90834914	160426458	Haplotype_probs	13	Founder_probs
-0.169125	3.23103	-0.052344	HAPGRP_8	male_flowering_d6_ALL_qDTA3_2	AX-90834914	AX-90834914	160426458	Haplotype_probs	13	Founder_probs
0.562033	6.02516	0.0932811	HAPGRP_9	male_flowering_d6_ALL_qDTA3_2	AX-90834914	AX-90834914	160426458	Haplotype_probs	13	Founder_probs
18.3841	3.5587	5.16595	HAPGRP_10	male_flowering_d6_ALL_qDTA3_2	AX-90834914	AX-90834914	160426458	Haplotype_probs	13	Founder_probs
0.984858	2.63618	0.373593	HAPGRP_11	male_flowering_d6_ALL_qDTA3_2	AX-90834914	AX-90834914	160426458	Haplotype_probs	13	Founder_probs
1.22977	4.04025	0.304381	HAPGRP_12	male_flowering_d6_ALL_qDTA3_2	AX-90834914	AX-90834914	160426458	Haplotype_probs	13	Founder_probs
-2.69905	4.50403	-0.599251	HAPGRP_13	male_flowering_d6_ALL_qDTA3_2	AX-90834914	AX-90834914	160426458	Haplotype_probs	13	Founder_probs
10.7101	2.8247	3.79159	HAPGRP_1	male_flowering_d6_ALL_qDTA8	AX-91102763	AX-91102778	135165296	Haplotype_probs	14	Founder_probs
10.5165	5.3839	1.95332	HAPGRP_2	male_flowering_d6_ALL_qDTA8	AX-91102763	AX-91102778	135165296	Haplotype_probs	14	Founder_probs
-6.04124	3.29174	-1.83527	HAPGRP_3	male_flowering_d6_ALL_qDTA8	AX-91102763	AX-91102778	135165296	Haplotype_probs	14	Founder_probs
11.5903	4.46004	2.59869	HAPGRP_4	male_flowering_d6_ALL_qDTA8	AX-91102763	AX-91102778	135165296	Haplotype_probs	14	Founder_probs
-8.89067	2.73066	-3.25587	HAPGRP_5	male_flowering_d6_ALL_qDTA8	AX-91102763	AX-91102778	135165296	Haplotype_probs	14	Founder_probs
-7.25209	3.94167	-1.83985	HAPGRP_6	male_flowering_d6_ALL_qDTA8	AX-91102763	AX-91102778	135165296	Haplotype_probs	14	Founder_probs
8.4416	4.56062	1.85097	HAPGRP_7	male_flowering_d6_ALL_qDTA8	AX-91102763	AX-91102778	135165296	Haplotype_probs	14	Founder_probs
-17.1818	4.75254	-3.61528	HAPGRP_8	male_flowering_d6_ALL_qDTA8	AX-91102763	AX-91102778	135165296	Haplotype_probs	14	Founder_probs
-8.89602	3.45118	-2.57767	HAPGRP_9	male_flowering_d6_ALL_qDTA8	AX-91102763	AX-91102778	135165296	Haplotype_probs	14	Founder_probs
-2.57409	4.9013	-0.525186	HAPGRP_10	male_flowering_d6_ALL_qDTA8	AX-91102763	AX-91102778	135165296	Haplotype_probs	14	Founder_probs
20.1781	6.39231	3.15662	HAPGRP_11	male_flowering_d6_ALL_qDTA8	AX-91102763	AX-91102778	135165296	Haplotype_probs	14	Founder_probs
6.79597	6.12568	1.10942	HAPGRP_12	male_flowering_d6_ALL_qDTA8	AX-91102763	AX-91102778	135165296	Haplotype_probs	14	Founder_probs
-13.0377	5.44743	-2.39336	HAPGRP_13	male_flowering_d6_ALL_qDTA8	AX-91102763	AX-91102778	135165296	Haplotype_probs	14	Founder_probs
16.5004	4.69132	3.51723	HAPGRP_14	male_flowering_d6_ALL_qDTA8	AX-91102763	AX-91102778	135165296	Haplotype_probs	14	Founder_probs
0.282083	4.98661	0.0565682	HAPGRP_1	male_flowering_d6_ALL_qDTA9	AX-91146091	AX-91146091	118776019	Haplotype_probs	15	Founder_probs
-12.6747	5.08305	-2.49352	HAPGRP_2	male_flowering_d6_ALL_qDTA9	AX-91146091	AX-91146091	118776019	Haplotype_probs	15	Founder_probs
-8.34507	3.68037	-2.26745	HAPGRP_3	male_flowering_d6_ALL_qDTA9	AX-91146091	AX-91146091	118776019	Haplotype_probs	15	Founder_probs
-6.12481	4.51297	-1.35716	HAPGRP_4	male_flowering_d6_ALL_qDTA9	AX-91146091	AX-91146091	118776019	Haplotype_probs	15	Founder_probs
-1.80795	4.50553	-0.401273	HAPGRP_5	male_flowering_d6_ALL_qDTA9	AX-91146091	AX-91146091	118776019	Haplotype_probs	15	Founder_probs
-0.504176	2.88831	-0.174557	HAPGRP_6	male_flowering_d6_ALL_qDTA9	AX-91146091	AX-91146091	118776019	Haplotype_probs	15	Founder_probs
5.65732	4.91461	1.15112	HAPGRP_7	male_flowering_d6_ALL_qDTA9	AX-91146091	AX-91146091	118776019	Haplotype_probs	15	Founder_probs
-2.99598	5.85805	-0.511429	HAPGRP_8	male_flowering_d6_ALL_qDTA9	AX-91146091	AX-91146091	118776019	Haplotype_probs	15	Founder_probs
5.18809	4.35035	1.19257	HAPGRP_9	male_flowering_d6_ALL_qDTA9	AX-91146091	AX-91146091	118776019	Haplotype_probs	15	Founder_probs
4.0503	3.78342	1.07054	HAPGRP_10	male_flowering_d6_ALL_qDTA9	AX-91146091	AX-91146091	118776019	Haplotype_probs	15	Founder_probs
14.1345	4.02279	3.51361	HAPGRP_11	male_flowering_d6_ALL_qDTA9	AX-91146091	AX-91146091	118776019	Haplotype_probs	15	Founder_probs
20.3812	5.15784	3.95151	HAPGRP_12	male_flowering_d6_ALL_qDTA9	AX-91146091	AX-91146091	118776019	Haplotype_probs	15	Founder_probs
-6.6135	4.64525	-1.42371	HAPGRP_13	male_flowering_d6_ALL_qDTA9	AX-91146091	AX-91146091	118776019	Haplotype_probs	15	Founder_probs
2.98938	4.85991	0.61511	HAPGRP_14	male_flowering_d6_ALL_qDTA9	AX-91146091	AX-91146091	118776019	Haplotype_probs	15	Founder_probs
-11.0584	4.14448	-2.66822	HAPGRP_15	male_flowering_d6_ALL_qDTA9	AX-91146091	AX-91146091	118776019	Haplotype_probs	15	Founder_probs
10.4582	4.39956	2.3771	HAPGRP_1	male_flowering_d6_ALL_qDTA3_1	AX-90796949	AX-90796949	11159770	Haplotype_probs	12	Haplotype_probs
-35.2098	18.2365	-1.93073	HAPGRP_2	male_flowering_d6_ALL_qDTA3_1	AX-90796949	AX-90796949	11159770	Haplotype_probs	12	Haplotype_probs
-19.2738	3.76974	-5.11276	HAPGRP_3	male_flowering_d6_ALL_qDTA3_1	AX-90796949	AX-90796949	11159770	Haplotype_probs	12	Haplotype_probs
-6.17897	2.70787	-2.28186	HAPGRP_4	male_flowering_d6_ALL_qDTA3_1	AX-90796949	AX-90796949	11159770	Haplotype_probs	12	Haplotype_probs
1.23772	3.29332	0.375829	HAPGRP_5	male_flowering_d6_ALL_qDTA3_1	AX-90796949	AX-90796949	11159770	Haplotype_probs	12	Haplotype_probs
-1.75912	4.91626	-0.357817	HAPGRP_6	male_flowering_d6_ALL_qDTA3_1	AX-90796949	AX-90796949	11159770	Haplotype_probs	12	Haplotype_probs
0.0654986	4.18881	0.0156366	HAPGRP_7	male_flowering_d6_ALL_qDTA3_1	AX-90796949	AX-90796949	11159770	Haplotype_probs	12	Haplotype_probs
7.17266	8.58994	0.835007	HAPGRP_8	male_flowering_d6_ALL_qDTA3_1	AX-90796949	AX-90796949	11159770	Haplotype_probs	12	Haplotype_probs
12.3875	4.61426	2.68461	HAPGRP_9	male_flowering_d6_ALL_qDTA3_1	AX-90796949	AX-90796949	11159770	Haplotype_probs	12	Haplotype_probs
6.08732	3.25161	1.87209	HAPGRP_10	male_flowering_d6_ALL_qDTA3_1	AX-90796949	AX-90796949	11159770	Haplotype_probs	12	Haplotype_probs
4.59906	3.75337	1.22532	HAPGRP_11	male_flowering_d6_ALL_qDTA3_1	AX-90796949	AX-90796949	11159770	Haplotype_probs	12	Haplotype_probs
4.84284	4.0083	1.2082	HAPGRP_12	male_flowering_d6_ALL_qDTA3_1	AX-90796949	AX-90796949	11159770	Haplotype_probs	12	Haplotype_probs
4.46166	5.14024	0.867987	HAPGRP_1	male_flowering_d6_ALL_qDTA3_2	AX-90834914	AX-90834914	160426458	Haplotype_probs	13	Haplotype_probs
-0.606673	6.14599	-0.0987104	HAPGRP_2	male_flowering_d6_ALL_qDTA3_2	AX-90834914	AX-90834914	160426458	Haplotype_probs	13	Haplotype_probs
-17.4163	3.27421	-5.31925	HAPGRP_3	male_flowering_d6_ALL_qDTA3_2	AX-90834914	AX-90834914	160426458	Haplotype_probs	13	Haplotype_probs
-17.8021	5.58603	-3.1869	HAPGRP_4	male_flowering_d6_ALL_qDTA3_2	AX-90834914	AX-90834914	160426458	Haplotype_probs	13	Haplotype_probs
12.919	3.64607	3.54328	HAPGRP_5	male_flowering_d6_ALL_qDTA3_2	AX-90834914	AX-90834914	160426458	Haplotype_probs	13	Haplotype_probs
-3.60266	5.68223	-0.634022	HAPGRP_6	male_flowering_d6_ALL_qDTA3_2	AX-90834914	AX-90834914	160426458	Haplotype_probs	13	Haplotype_probs
-6.90198	4.40738	-1.56601	HAPGRP_7	male_flowering_d6_ALL_qDTA3_2	AX-90834914	AX-90834914	160426458	Haplotype_probs	13	Haplotype_probs
-0.169125	3.23103	-0.052344	HAPGRP_8	male_flowering_d6_ALL_qDTA3_2	AX-90834914	AX-90834914	160426458	Haplotype_probs	13	Haplotype_probs
0.562033	6.02516	0.0932811	HAPGRP_9	male_flowering_d6_ALL_qDTA3_2	AX-90834914	AX-90834914	160426458	Haplotype_probs	13	Haplotype_probs
18.3841	3.5587	5.16595	HAPGRP_10	male_flowering_d6_ALL_qDTA3_2	AX-90834914	AX-90834914	160426458	Haplotype_probs	13	Haplotype_probs
0.984858	2.63618	0.373593	HAPGRP_11	male_flowering_d6_ALL_qDTA3_2	AX-90834914	AX-90834914	160426458	Haplotype_probs	13	Haplotype_probs
1.22977	4.04025	0.304381	HAPGRP_12	male_flowering_d6_ALL_qDTA3_2	AX-90834914	AX-90834914	160426458	Haplotype_probs	13	Haplotype_probs
-2.69905	4.50403	-0.599251	HAPGRP_13	male_flowering_d6_ALL_qDTA3_2	AX-90834914	AX-90834914	160426458	Haplotype_probs	13	Haplotype_probs
10.7101	2.8247	3.79159	HAPGRP_1	male_flowering_d6_ALL_qDTA8	AX-91102778	AX-91102778	135145003	Haplotype_probs	14	Haplotype_probs
10.5165	5.3839	1.95332	HAPGRP_2	male_flowering_d6_ALL_qDTA8	AX-91102778	AX-91102778	135145003	Haplotype_probs	14	Haplotype_probs
-6.04124	3.29174	-1.83527	HAPGRP_3	male_flowering_d6_ALL_qDTA8	AX-91102778	AX-91102778	135145003	Haplotype_probs	14	Haplotype_probs
11.5903	4.46004	2.59869	HAPGRP_4	male_flowering_d6_ALL_qDTA8	AX-91102778	AX-91102778	135145003	Haplotype_probs	14	Haplotype_probs
-8.89067	2.73066	-3.25587	HAPGRP_5	male_flowering_d6_ALL_qDTA8	AX-91102778	AX-91102778	135145003	Haplotype_probs	14	Haplotype_probs
-7.25209	3.94167	-1.83985	HAPGRP_6	male_flowering_d6_ALL_qDTA8	AX-91102778	AX-91102778	135145003	Haplotype_probs	14	Haplotype_probs
8.4416	4.56062	1.85097	HAPGRP_7	male_flowering_d6_ALL_qDTA8	AX-91102778	AX-91102778	135145003	Haplotype_probs	14	Haplotype_probs
-17.1818	4.75254	-3.61528	HAPGRP_8	male_flowering_d6_ALL_qDTA8	AX-91102778	AX-91102778	135145003	Haplotype_probs	14	Haplotype_probs
-8.89602	3.45118	-2.57767	HAPGRP_9	male_flowering_d6_ALL_qDTA8	AX-91102778	AX-91102778	135145003	Haplotype_probs	14	Haplotype_probs
-2.57409	4.9013	-0.525186	HAPGRP_10	male_flowering_d6_ALL_qDTA8	AX-91102778	AX-91102778	135145003	Haplotype_probs	14	Haplotype_probs
20.1781	6.39231	3.15662	HAPGRP_11	male_flowering_d6_ALL_qDTA8	AX-91102778	AX-91102778	135145003	Haplotype_probs	14	Haplotype_probs
6.79597	6.12568	1.10942	HAPGRP_12	male_flowering_d6_ALL_qDTA8	AX-91102778	AX-91102778	135145003	Haplotype_probs	14	Haplotype_probs
-13.0377	5.44743	-2.39336	HAPGRP_13	male_flowering_d6_ALL_qDTA8	AX-91102778	AX-91102778	135145003	Haplotype_probs	14	Haplotype_probs
16.5004	4.69132	3.51723	HAPGRP_14	male_flowering_d6_ALL_qDTA8	AX-91102778	AX-91102778	135145003	Haplotype_probs	14	Haplotype_probs
10.9854	2.55393	4.30136	HAPGRP_1	male_flowering_d6_BLOIS_2014_OPT_qDTA3_2	AX-91583310	AX-90834938	160559294	Haplotype_probs	11	600K_SNP
-4.03987	6.79665	-0.594391	HAPGRP_2	male_flowering_d6_BLOIS_2014_OPT_qDTA3_2	AX-91583310	AX-90834938	160559294	Haplotype_probs	11	600K_SNP
-16.8966	3.68166	-4.5894	HAPGRP_3	male_flowering_d6_BLOIS_2014_OPT_qDTA3_2	AX-91583310	AX-90834938	160559294	Haplotype_probs	11	600K_SNP
-19.4615	6.16774	-3.15537	HAPGRP_4	male_flowering_d6_BLOIS_2014_OPT_qDTA3_2	AX-91583310	AX-90834938	160559294	Haplotype_probs	11	600K_SNP
10.8201	4.22456	2.56125	HAPGRP_5	male_flowering_d6_BLOIS_2014_OPT_qDTA3_2	AX-91583310	AX-90834938	160559294	Haplotype_probs	11	600K_SNP
-5.42096	6.28957	-0.861896	HAPGRP_6	male_flowering_d6_BLOIS_2014_OPT_qDTA3_2	AX-91583310	AX-90834938	160559294	Haplotype_probs	11	600K_SNP
-9.18369	5.13115	-1.78979	HAPGRP_7	male_flowering_d6_BLOIS_2014_OPT_qDTA3_2	AX-91583310	AX-90834938	160559294	Haplotype_probs	11	600K_SNP
3.27492	3.61623	0.905618	HAPGRP_8	male_flowering_d6_BLOIS_2014_OPT_qDTA3_2	AX-91583310	AX-90834938	160559294	Haplotype_probs	11	600K_SNP
-4.65677	6.73734	-0.691187	HAPGRP_9	male_flowering_d6_BLOIS_2014_OPT_qDTA3_2	AX-91583310	AX-90834938	160559294	Haplotype_probs	11	600K_SNP
-1.50013	3.02495	-0.495919	HAPGRP_10	male_flowering_d6_BLOIS_2014_OPT_qDTA3_2	AX-91583310	AX-90834938	160559294	Haplotype_probs	11	600K_SNP
2.8743	5.05842	0.568222	HAPGRP_11	male_flowering_d6_BLOIS_2014_OPT_qDTA3_2	AX-91583310	AX-90834938	160559294	Haplotype_probs	11	600K_SNP
14.8319	3.326	4.45939	HAPGRP_1	male_flowering_d6_BLOIS_2014_OPT_qDTA8	AX-90635917	AX-90639608	137872380	Haplotype_probs	15	600K_SNP
8.90853	5.83966	1.52552	HAPGRP_2	male_flowering_d6_BLOIS_2014_OPT_qDTA8	AX-90635917	AX-90639608	137872380	Haplotype_probs	15	600K_SNP
-9.03585	2.70291	-3.34301	HAPGRP_3	male_flowering_d6_BLOIS_2014_OPT_qDTA8	AX-90635917	AX-90639608	137872380	Haplotype_probs	15	600K_SNP
14.1878	5.65973	2.5068	HAPGRP_4	male_flowering_d6_BLOIS_2014_OPT_qDTA8	AX-90635917	AX-90639608	137872380	Haplotype_probs	15	600K_SNP
-4.57063	4.48179	-1.01982	HAPGRP_6	male_flowering_d6_BLOIS_2014_OPT_qDTA8	AX-90635917	AX-90639608	137872380	Haplotype_probs	15	600K_SNP
-7.51453	4.62668	-1.62417	HAPGRP_7	male_flowering_d6_BLOIS_2014_OPT_qDTA8	AX-90635917	AX-90639608	137872380	Haplotype_probs	15	600K_SNP
6.7505	5.05053	1.33659	HAPGRP_8	male_flowering_d6_BLOIS_2014_OPT_qDTA8	AX-90635917	AX-90639608	137872380	Haplotype_probs	15	600K_SNP
-17.3465	4.68674	-3.70118	HAPGRP_9	male_flowering_d6_BLOIS_2014_OPT_qDTA8	AX-90635917	AX-90639608	137872380	Haplotype_probs	15	600K_SNP
-1.18988	5.66067	-0.210201	HAPGRP_10	male_flowering_d6_BLOIS_2014_OPT_qDTA8	AX-90635917	AX-90639608	137872380	Haplotype_probs	15	600K_SNP
22.473	9.15086	2.45584	HAPGRP_11	male_flowering_d6_BLOIS_2014_OPT_qDTA8	AX-90635917	AX-90639608	137872380	Haplotype_probs	15	600K_SNP
-9.70901	5.02132	-1.93356	HAPGRP_12	male_flowering_d6_BLOIS_2014_OPT_qDTA8	AX-90635917	AX-90639608	137872380	Haplotype_probs	15	600K_SNP
6.63754	6.82801	0.972104	HAPGRP_13	male_flowering_d6_BLOIS_2014_OPT_qDTA8	AX-90635917	AX-90639608	137872380	Haplotype_probs	15	600K_SNP
-17.0468	6.29034	-2.71	HAPGRP_14	male_flowering_d6_BLOIS_2014_OPT_qDTA8	AX-90635917	AX-90639608	137872380	Haplotype_probs	15	600K_SNP
19.0281	5.58132	3.40925	HAPGRP_15	male_flowering_d6_BLOIS_2014_OPT_qDTA8	AX-90635917	AX-90639608	137872380	Haplotype_probs	15	600K_SNP
2.42533	5.38502	0.450386	HAPGRP_1	male_flowering_d6_BLOIS_2014_OPT_qDTA3_2	AX-90834556	AX-91447688	158988768	Haplotype_probs	14	Founder_probs
-8.44096	6.99125	-1.20736	HAPGRP_2	male_flowering_d6_BLOIS_2014_OPT_qDTA3_2	AX-90834556	AX-91447688	158988768	Haplotype_probs	14	Founder_probs
-10.2305	5.57947	-1.83359	HAPGRP_3	male_flowering_d6_BLOIS_2014_OPT_qDTA3_2	AX-90834556	AX-91447688	158988768	Haplotype_probs	14	Founder_probs
-6.31642	3.75303	-1.68302	HAPGRP_4	male_flowering_d6_BLOIS_2014_OPT_qDTA3_2	AX-90834556	AX-91447688	158988768	Haplotype_probs	14	Founder_probs
11.1305	3.92309	2.83718	HAPGRP_5	male_flowering_d6_BLOIS_2014_OPT_qDTA3_2	AX-90834556	AX-91447688	158988768	Haplotype_probs	14	Founder_probs
-7.73705	6.70817	-1.15338	HAPGRP_6	male_flowering_d6_BLOIS_2014_OPT_qDTA3_2	AX-90834556	AX-91447688	158988768	Haplotype_probs	14	Founder_probs
-7.00359	4.63099	-1.51233	HAPGRP_7	male_flowering_d6_BLOIS_2014_OPT_qDTA3_2	AX-90834556	AX-91447688	158988768	Haplotype_probs	14	Founder_probs
8.04048	4.56429	1.7616	HAPGRP_8	male_flowering_d6_BLOIS_2014_OPT_qDTA3_2	AX-90834556	AX-91447688	158988768	Haplotype_probs	14	Founder_probs
-19.4718	4.80169	-4.0552	HAPGRP_9	male_flowering_d6_BLOIS_2014_OPT_qDTA3_2	AX-90834556	AX-91447688	158988768	Haplotype_probs	14	Founder_probs
-2.78005	3.26325	-0.851927	HAPGRP_10	male_flowering_d6_BLOIS_2014_OPT_qDTA3_2	AX-90834556	AX-91447688	158988768	Haplotype_probs	14	Founder_probs
-4.22235	6.50221	-0.649371	HAPGRP_11	male_flowering_d6_BLOIS_2014_OPT_qDTA3_2	AX-90834556	AX-91447688	158988768	Haplotype_probs	14	Founder_probs
21.3003	4.00207	5.32232	HAPGRP_12	male_flowering_d6_BLOIS_2014_OPT_qDTA3_2	AX-90834556	AX-91447688	158988768	Haplotype_probs	14	Founder_probs
4.30586	4.238	1.01601	HAPGRP_13	male_flowering_d6_BLOIS_2014_OPT_qDTA3_2	AX-90834556	AX-91447688	158988768	Haplotype_probs	14	Founder_probs
-0.592359	5.16518	-0.114683	HAPGRP_14	male_flowering_d6_BLOIS_2014_OPT_qDTA3_2	AX-90834556	AX-91447688	158988768	Haplotype_probs	14	Founder_probs
18.7789	3.26109	5.75847	HAPGRP_1	male_flowering_d6_BLOIS_2014_OPT_qDTA8	PZA01038.1	PZA01038.1	128420026	Haplotype_probs	15	Founder_probs
3.59625	5.98645	0.600731	HAPGRP_2	male_flowering_d6_BLOIS_2014_OPT_qDTA8	PZA01038.1	PZA01038.1	128420026	Haplotype_probs	15	Founder_probs
-6.39292	3.7862	-1.68848	HAPGRP_3	male_flowering_d6_BLOIS_2014_OPT_qDTA8	PZA01038.1	PZA01038.1	128420026	Haplotype_probs	15	Founder_probs
8.08975	4.59562	1.76032	HAPGRP_4	male_flowering_d6_BLOIS_2014_OPT_qDTA8	PZA01038.1	PZA01038.1	128420026	Haplotype_probs	15	Founder_probs
-8.48118	4.00323	-2.11858	HAPGRP_5	male_flowering_d6_BLOIS_2014_OPT_qDTA8	PZA01038.1	PZA01038.1	128420026	Haplotype_probs	15	Founder_probs
-4.87433	4.27021	-1.14147	HAPGRP_6	male_flowering_d6_BLOIS_2014_OPT_qDTA8	PZA01038.1	PZA01038.1	128420026	Haplotype_probs	15	Founder_probs
5.76301	5.86278	0.982982	HAPGRP_7	male_flowering_d6_BLOIS_2014_OPT_qDTA8	PZA01038.1	PZA01038.1	128420026	Haplotype_probs	15	Founder_probs
-12.9647	5.55555	-2.33364	HAPGRP_8	male_flowering_d6_BLOIS_2014_OPT_qDTA8	PZA01038.1	PZA01038.1	128420026	Haplotype_probs	15	Founder_probs
-14.9963	4.09913	-3.6584	HAPGRP_9	male_flowering_d6_BLOIS_2014_OPT_qDTA8	PZA01038.1	PZA01038.1	128420026	Haplotype_probs	15	Founder_probs
-0.842285	4.85697	-0.173418	HAPGRP_10	male_flowering_d6_BLOIS_2014_OPT_qDTA8	PZA01038.1	PZA01038.1	128420026	Haplotype_probs	15	Founder_probs
14.8385	6.58672	2.25278	HAPGRP_11	male_flowering_d6_BLOIS_2014_OPT_qDTA8	PZA01038.1	PZA01038.1	128420026	Haplotype_probs	15	Founder_probs
-15.1202	5.06072	-2.98775	HAPGRP_12	male_flowering_d6_BLOIS_2014_OPT_qDTA8	PZA01038.1	PZA01038.1	128420026	Haplotype_probs	15	Founder_probs
10.1768	6.9505	1.46418	HAPGRP_13	male_flowering_d6_BLOIS_2014_OPT_qDTA8	PZA01038.1	PZA01038.1	128420026	Haplotype_probs	15	Founder_probs
-14.8473	5.86924	-2.52968	HAPGRP_14	male_flowering_d6_BLOIS_2014_OPT_qDTA8	PZA01038.1	PZA01038.1	128420026	Haplotype_probs	15	Founder_probs
21.317	5.83146	3.65552	HAPGRP_15	male_flowering_d6_BLOIS_2014_OPT_qDTA8	PZA01038.1	PZA01038.1	128420026	Haplotype_probs	15	Founder_probs
2.95567	5.35057	0.552404	HAPGRP_1	male_flowering_d6_BLOIS_2014_OPT_qDTA3_2	AX-90834861	AX-90834861	160277722	Haplotype_probs	12	Haplotype_probs
-3.24357	6.38853	-0.507718	HAPGRP_2	male_flowering_d6_BLOIS_2014_OPT_qDTA3_2	AX-90834861	AX-90834861	160277722	Haplotype_probs	12	Haplotype_probs
-11.4221	5.95946	-1.91663	HAPGRP_3	male_flowering_d6_BLOIS_2014_OPT_qDTA3_2	AX-90834861	AX-90834861	160277722	Haplotype_probs	12	Haplotype_probs
-19.704	6.00183	-3.28299	HAPGRP_4	male_flowering_d6_BLOIS_2014_OPT_qDTA3_2	AX-90834861	AX-90834861	160277722	Haplotype_probs	12	Haplotype_probs
12.2407	4.33657	2.82267	HAPGRP_5	male_flowering_d6_BLOIS_2014_OPT_qDTA3_2	AX-90834861	AX-90834861	160277722	Haplotype_probs	12	Haplotype_probs
-6.42085	6.3762	-1.007	HAPGRP_6	male_flowering_d6_BLOIS_2014_OPT_qDTA3_2	AX-90834861	AX-90834861	160277722	Haplotype_probs	12	Haplotype_probs
-14.4022	3.19804	-4.50344	HAPGRP_7	male_flowering_d6_BLOIS_2014_OPT_qDTA3_2	AX-90834861	AX-90834861	160277722	Haplotype_probs	12	Haplotype_probs
5.15004	2.99868	1.71744	HAPGRP_8	male_flowering_d6_BLOIS_2014_OPT_qDTA3_2	AX-90834861	AX-90834861	160277722	Haplotype_probs	12	Haplotype_probs
-2.94227	6.0209	-0.488676	HAPGRP_9	male_flowering_d6_BLOIS_2014_OPT_qDTA3_2	AX-90834861	AX-90834861	160277722	Haplotype_probs	12	Haplotype_probs
-2.198	2.61895	-0.839268	HAPGRP_10	male_flowering_d6_BLOIS_2014_OPT_qDTA3_2	AX-90834861	AX-90834861	160277722	Haplotype_probs	12	Haplotype_probs
22.0227	3.87055	5.6898	HAPGRP_11	male_flowering_d6_BLOIS_2014_OPT_qDTA3_2	AX-90834861	AX-90834861	160277722	Haplotype_probs	12	Haplotype_probs
2.93715	4.92325	0.596588	HAPGRP_12	male_flowering_d6_BLOIS_2014_OPT_qDTA3_2	AX-90834861	AX-90834861	160277722	Haplotype_probs	12	Haplotype_probs
18.487	3.28653	5.62507	HAPGRP_1	male_flowering_d6_BLOIS_2014_OPT_qDTA8	AX-91101099	AX-91101099	128743539	Haplotype_probs	13	Haplotype_probs
4.05342	5.97153	0.678791	HAPGRP_2	male_flowering_d6_BLOIS_2014_OPT_qDTA8	AX-91101099	AX-91101099	128743539	Haplotype_probs	13	Haplotype_probs
-6.93091	2.62615	-2.63919	HAPGRP_3	male_flowering_d6_BLOIS_2014_OPT_qDTA8	AX-91101099	AX-91101099	128743539	Haplotype_probs	13	Haplotype_probs
7.83628	4.57743	1.71194	HAPGRP_4	male_flowering_d6_BLOIS_2014_OPT_qDTA8	AX-91101099	AX-91101099	128743539	Haplotype_probs	13	Haplotype_probs
-8.19766	3.33463	-2.45834	HAPGRP_5	male_flowering_d6_BLOIS_2014_OPT_qDTA8	AX-91101099	AX-91101099	128743539	Haplotype_probs	13	Haplotype_probs
6.63138	5.59721	1.18477	HAPGRP_6	male_flowering_d6_BLOIS_2014_OPT_qDTA8	AX-91101099	AX-91101099	128743539	Haplotype_probs	13	Haplotype_probs
-15.2082	5.38038	-2.82661	HAPGRP_7	male_flowering_d6_BLOIS_2014_OPT_qDTA8	AX-91101099	AX-91101099	128743539	Haplotype_probs	13	Haplotype_probs
-14.7199	4.09336	-3.59604	HAPGRP_8	male_flowering_d6_BLOIS_2014_OPT_qDTA8	AX-91101099	AX-91101099	128743539	Haplotype_probs	13	Haplotype_probs
-1.19462	4.84256	-0.246691	HAPGRP_9	male_flowering_d6_BLOIS_2014_OPT_qDTA8	AX-91101099	AX-91101099	128743539	Haplotype_probs	13	Haplotype_probs
14.8595	6.57273	2.26078	HAPGRP_10	male_flowering_d6_BLOIS_2014_OPT_qDTA8	AX-91101099	AX-91101099	128743539	Haplotype_probs	13	Haplotype_probs
-14.7946	5.04531	-2.93235	HAPGRP_11	male_flowering_d6_BLOIS_2014_OPT_qDTA8	AX-91101099	AX-91101099	128743539	Haplotype_probs	13	Haplotype_probs
10.759	7.10407	1.51449	HAPGRP_12	male_flowering_d6_BLOIS_2014_OPT_qDTA8	AX-91101099	AX-91101099	128743539	Haplotype_probs	13	Haplotype_probs
21.6491	5.82246	3.7182	HAPGRP_13	male_flowering_d6_BLOIS_2014_OPT_qDTA8	AX-91101099	AX-91101099	128743539	Haplotype_probs	13	Haplotype_probs
8.88477	5.1815	1.71471	HAPGRP_1	male_flowering_d6_BLOIS_2017_OPT_qDTA8	AX-91106658	AX-91106658	149450033	Haplotype_probs	16	600K_SNP
12.3309	5.71886	2.15617	HAPGRP_2	male_flowering_d6_BLOIS_2017_OPT_qDTA8	AX-91106658	AX-91106658	149450033	Haplotype_probs	16	600K_SNP
-13.8494	5.4048	-2.56243	HAPGRP_3	male_flowering_d6_BLOIS_2017_OPT_qDTA8	AX-91106658	AX-91106658	149450033	Haplotype_probs	16	600K_SNP
1.95808	5.89069	0.332403	HAPGRP_4	male_flowering_d6_BLOIS_2017_OPT_qDTA8	AX-91106658	AX-91106658	149450033	Haplotype_probs	16	600K_SNP
10.3149	6.76987	1.52364	HAPGRP_5	male_flowering_d6_BLOIS_2017_OPT_qDTA8	AX-91106658	AX-91106658	149450033	Haplotype_probs	16	600K_SNP
1.6622	5.91719	0.280911	HAPGRP_6	male_flowering_d6_BLOIS_2017_OPT_qDTA8	AX-91106658	AX-91106658	149450033	Haplotype_probs	16	600K_SNP
0.392703	5.50212	0.0713731	HAPGRP_7	male_flowering_d6_BLOIS_2017_OPT_qDTA8	AX-91106658	AX-91106658	149450033	Haplotype_probs	16	600K_SNP
15.6549	7.39105	2.11809	HAPGRP_8	male_flowering_d6_BLOIS_2017_OPT_qDTA8	AX-91106658	AX-91106658	149450033	Haplotype_probs	16	600K_SNP
-19.7061	7.02268	-2.80606	HAPGRP_9	male_flowering_d6_BLOIS_2017_OPT_qDTA8	AX-91106658	AX-91106658	149450033	Haplotype_probs	16	600K_SNP
-14.1538	5.1652	-2.74023	HAPGRP_10	male_flowering_d6_BLOIS_2017_OPT_qDTA8	AX-91106658	AX-91106658	149450033	Haplotype_probs	16	600K_SNP
-21.6338	7.10129	-3.04646	HAPGRP_11	male_flowering_d6_BLOIS_2017_OPT_qDTA8	AX-91106658	AX-91106658	149450033	Haplotype_probs	16	600K_SNP
26.4413	11.0605	2.3906	HAPGRP_12	male_flowering_d6_BLOIS_2017_OPT_qDTA8	AX-91106658	AX-91106658	149450033	Haplotype_probs	16	600K_SNP
-5.79027	5.70357	-1.0152	HAPGRP_13	male_flowering_d6_BLOIS_2017_OPT_qDTA8	AX-91106658	AX-91106658	149450033	Haplotype_probs	16	600K_SNP
6.47508	9.07385	0.713598	HAPGRP_14	male_flowering_d6_BLOIS_2017_OPT_qDTA8	AX-91106658	AX-91106658	149450033	Haplotype_probs	16	600K_SNP
-6.72656	9.52242	-0.706392	HAPGRP_15	male_flowering_d6_BLOIS_2017_OPT_qDTA8	AX-91106658	AX-91106658	149450033	Haplotype_probs	16	600K_SNP
17.8134	6.30904	2.82348	HAPGRP_16	male_flowering_d6_BLOIS_2017_OPT_qDTA8	AX-91106658	AX-91106658	149450033	Haplotype_probs	16	600K_SNP
5.85127	6.60707	0.885608	HAPGRP_1	male_flowering_d6_BLOIS_2017_OPT_qDTA3_1	AX-90796752	AX-90796752	10269770	Haplotype_probs	15	Founder_probs
-212.339	80.6315	-2.63345	HAPGRP_2	male_flowering_d6_BLOIS_2017_OPT_qDTA3_1	AX-90796752	AX-90796752	10269770	Haplotype_probs	15	Founder_probs
-21.7662	5.10288	-4.26548	HAPGRP_3	male_flowering_d6_BLOIS_2017_OPT_qDTA3_1	AX-90796752	AX-90796752	10269770	Haplotype_probs	15	Founder_probs
-6.77463	10.0216	-0.676005	HAPGRP_4	male_flowering_d6_BLOIS_2017_OPT_qDTA3_1	AX-90796752	AX-90796752	10269770	Haplotype_probs	15	Founder_probs
-1.06642	5.69863	-0.187136	HAPGRP_5	male_flowering_d6_BLOIS_2017_OPT_qDTA3_1	AX-90796752	AX-90796752	10269770	Haplotype_probs	15	Founder_probs
2.33679	7.51034	0.311143	HAPGRP_6	male_flowering_d6_BLOIS_2017_OPT_qDTA3_1	AX-90796752	AX-90796752	10269770	Haplotype_probs	15	Founder_probs
-7.06004	4.96155	-1.42295	HAPGRP_7	male_flowering_d6_BLOIS_2017_OPT_qDTA3_1	AX-90796752	AX-90796752	10269770	Haplotype_probs	15	Founder_probs
7.3112	6.18884	1.18135	HAPGRP_8	male_flowering_d6_BLOIS_2017_OPT_qDTA3_1	AX-90796752	AX-90796752	10269770	Haplotype_probs	15	Founder_probs
-3.69073	6.78775	-0.543734	HAPGRP_9	male_flowering_d6_BLOIS_2017_OPT_qDTA3_1	AX-90796752	AX-90796752	10269770	Haplotype_probs	15	Founder_probs
11.5024	12.3206	0.933589	HAPGRP_10	male_flowering_d6_BLOIS_2017_OPT_qDTA3_1	AX-90796752	AX-90796752	10269770	Haplotype_probs	15	Founder_probs
17.649	6.60634	2.67152	HAPGRP_11	male_flowering_d6_BLOIS_2017_OPT_qDTA3_1	AX-90796752	AX-90796752	10269770	Haplotype_probs	15	Founder_probs
8.10738	4.54959	1.782	HAPGRP_12	male_flowering_d6_BLOIS_2017_OPT_qDTA3_1	AX-90796752	AX-90796752	10269770	Haplotype_probs	15	Founder_probs
7.13989	5.89278	1.21163	HAPGRP_13	male_flowering_d6_BLOIS_2017_OPT_qDTA3_1	AX-90796752	AX-90796752	10269770	Haplotype_probs	15	Founder_probs
12.5116	5.87217	2.13066	HAPGRP_14	male_flowering_d6_BLOIS_2017_OPT_qDTA3_1	AX-90796752	AX-90796752	10269770	Haplotype_probs	15	Founder_probs
-13.839	7.80321	-1.7735	HAPGRP_15	male_flowering_d6_BLOIS_2017_OPT_qDTA3_1	AX-90796752	AX-90796752	10269770	Haplotype_probs	15	Founder_probs
5.24817	7.37814	0.711313	HAPGRP_1	male_flowering_d6_BLOIS_2017_OPT_qDTA3_2	AX-90834914	AX-90834914	160426458	Haplotype_probs	13	Founder_probs
0.503247	8.71161	0.0577674	HAPGRP_2	male_flowering_d6_BLOIS_2017_OPT_qDTA3_2	AX-90834914	AX-90834914	160426458	Haplotype_probs	13	Founder_probs
-24.7952	4.731	-5.24101	HAPGRP_3	male_flowering_d6_BLOIS_2017_OPT_qDTA3_2	AX-90834914	AX-90834914	160426458	Haplotype_probs	13	Founder_probs
-21.0566	7.88381	-2.67087	HAPGRP_4	male_flowering_d6_BLOIS_2017_OPT_qDTA3_2	AX-90834914	AX-90834914	160426458	Haplotype_probs	13	Founder_probs
9.39102	5.44074	1.72606	HAPGRP_5	male_flowering_d6_BLOIS_2017_OPT_qDTA3_2	AX-90834914	AX-90834914	160426458	Haplotype_probs	13	Founder_probs
-2.08183	8.31607	-0.250338	HAPGRP_6	male_flowering_d6_BLOIS_2017_OPT_qDTA3_2	AX-90834914	AX-90834914	160426458	Haplotype_probs	13	Founder_probs
-7.14362	6.0686	-1.17714	HAPGRP_7	male_flowering_d6_BLOIS_2017_OPT_qDTA3_2	AX-90834914	AX-90834914	160426458	Haplotype_probs	13	Founder_probs
-3.23606	4.57467	-0.707387	HAPGRP_8	male_flowering_d6_BLOIS_2017_OPT_qDTA3_2	AX-90834914	AX-90834914	160426458	Haplotype_probs	13	Founder_probs
5.79065	8.06257	0.718213	HAPGRP_9	male_flowering_d6_BLOIS_2017_OPT_qDTA3_2	AX-90834914	AX-90834914	160426458	Haplotype_probs	13	Founder_probs
21.5722	4.96076	4.34856	HAPGRP_10	male_flowering_d6_BLOIS_2017_OPT_qDTA3_2	AX-90834914	AX-90834914	160426458	Haplotype_probs	13	Founder_probs
4.36824	3.82632	1.14163	HAPGRP_11	male_flowering_d6_BLOIS_2017_OPT_qDTA3_2	AX-90834914	AX-90834914	160426458	Haplotype_probs	13	Founder_probs
5.6167	5.81819	0.965369	HAPGRP_12	male_flowering_d6_BLOIS_2017_OPT_qDTA3_2	AX-90834914	AX-90834914	160426458	Haplotype_probs	13	Founder_probs
0.403363	6.44073	0.0626269	HAPGRP_13	male_flowering_d6_BLOIS_2017_OPT_qDTA3_2	AX-90834914	AX-90834914	160426458	Haplotype_probs	13	Founder_probs
8.88951	5.17976	1.7162	HAPGRP_1	male_flowering_d6_BLOIS_2017_OPT_qDTA8	AX-91106569	AX-91106528	148965697	Haplotype_probs	15	Founder_probs
14.7836	4.1904	3.52797	HAPGRP_2	male_flowering_d6_BLOIS_2017_OPT_qDTA8	AX-91106569	AX-91106528	148965697	Haplotype_probs	15	Founder_probs
-12.1877	5.50164	-2.21528	HAPGRP_3	male_flowering_d6_BLOIS_2017_OPT_qDTA8	AX-91106569	AX-91106528	148965697	Haplotype_probs	15	Founder_probs
1.35137	5.87873	0.229875	HAPGRP_4	male_flowering_d6_BLOIS_2017_OPT_qDTA8	AX-91106569	AX-91106528	148965697	Haplotype_probs	15	Founder_probs
12.8901	6.38337	2.01933	HAPGRP_5	male_flowering_d6_BLOIS_2017_OPT_qDTA8	AX-91106569	AX-91106528	148965697	Haplotype_probs	15	Founder_probs
1.5705	5.91153	0.265667	HAPGRP_6	male_flowering_d6_BLOIS_2017_OPT_qDTA8	AX-91106569	AX-91106528	148965697	Haplotype_probs	15	Founder_probs
-3.73466	5.8646	-0.636813	HAPGRP_7	male_flowering_d6_BLOIS_2017_OPT_qDTA8	AX-91106569	AX-91106528	148965697	Haplotype_probs	15	Founder_probs
12.2825	7.2309	1.69862	HAPGRP_8	male_flowering_d6_BLOIS_2017_OPT_qDTA8	AX-91106569	AX-91106528	148965697	Haplotype_probs	15	Founder_probs
-19.499	7.01787	-2.77848	HAPGRP_9	male_flowering_d6_BLOIS_2017_OPT_qDTA8	AX-91106569	AX-91106528	148965697	Haplotype_probs	15	Founder_probs
-13.6421	5.23308	-2.60689	HAPGRP_10	male_flowering_d6_BLOIS_2017_OPT_qDTA8	AX-91106569	AX-91106528	148965697	Haplotype_probs	15	Founder_probs
-21.0057	6.81692	-3.08141	HAPGRP_11	male_flowering_d6_BLOIS_2017_OPT_qDTA8	AX-91106569	AX-91106528	148965697	Haplotype_probs	15	Founder_probs
26.5575	11.0534	2.40266	HAPGRP_12	male_flowering_d6_BLOIS_2017_OPT_qDTA8	AX-91106569	AX-91106528	148965697	Haplotype_probs	15	Founder_probs
-6.84186	5.57892	-1.22638	HAPGRP_13	male_flowering_d6_BLOIS_2017_OPT_qDTA8	AX-91106569	AX-91106528	148965697	Haplotype_probs	15	Founder_probs
9.23954	8.63141	1.07046	HAPGRP_14	male_flowering_d6_BLOIS_2017_OPT_qDTA8	AX-91106569	AX-91106528	148965697	Haplotype_probs	15	Founder_probs
-6.78984	9.51443	-0.713636	HAPGRP_15	male_flowering_d6_BLOIS_2017_OPT_qDTA8	AX-91106569	AX-91106528	148965697	Haplotype_probs	15	Founder_probs
7.28164	6.21635	1.17137	HAPGRP_1	male_flowering_d6_BLOIS_2017_OPT_qDTA3_1	AX-90796949	AX-90796949	11159770	Haplotype_probs	12	Haplotype_probs
-51.613	25.4498	-2.02804	HAPGRP_2	male_flowering_d6_BLOIS_2017_OPT_qDTA3_1	AX-90796949	AX-90796949	11159770	Haplotype_probs	12	Haplotype_probs
-26.8863	5.26036	-5.11111	HAPGRP_3	male_flowering_d6_BLOIS_2017_OPT_qDTA3_1	AX-90796949	AX-90796949	11159770	Haplotype_probs	12	Haplotype_probs
-4.84595	3.89464	-1.24426	HAPGRP_4	male_flowering_d6_BLOIS_2017_OPT_qDTA3_1	AX-90796949	AX-90796949	11159770	Haplotype_probs	12	Haplotype_probs
-2.79733	4.62065	-0.605397	HAPGRP_5	male_flowering_d6_BLOIS_2017_OPT_qDTA3_1	AX-90796949	AX-90796949	11159770	Haplotype_probs	12	Haplotype_probs
-0.805663	6.94615	-0.115987	HAPGRP_6	male_flowering_d6_BLOIS_2017_OPT_qDTA3_1	AX-90796949	AX-90796949	11159770	Haplotype_probs	12	Haplotype_probs
6.71384	5.9876	1.12129	HAPGRP_7	male_flowering_d6_BLOIS_2017_OPT_qDTA3_1	AX-90796949	AX-90796949	11159770	Haplotype_probs	12	Haplotype_probs
11.088	11.3797	0.974368	HAPGRP_8	male_flowering_d6_BLOIS_2017_OPT_qDTA3_1	AX-90796949	AX-90796949	11159770	Haplotype_probs	12	Haplotype_probs
16.6695	6.38788	2.60955	HAPGRP_9	male_flowering_d6_BLOIS_2017_OPT_qDTA3_1	AX-90796949	AX-90796949	11159770	Haplotype_probs	12	Haplotype_probs
8.16446	4.50568	1.81204	HAPGRP_10	male_flowering_d6_BLOIS_2017_OPT_qDTA3_1	AX-90796949	AX-90796949	11159770	Haplotype_probs	12	Haplotype_probs
6.08409	5.40067	1.12654	HAPGRP_11	male_flowering_d6_BLOIS_2017_OPT_qDTA3_1	AX-90796949	AX-90796949	11159770	Haplotype_probs	12	Haplotype_probs
8.59071	5.82493	1.47482	HAPGRP_12	male_flowering_d6_BLOIS_2017_OPT_qDTA3_1	AX-90796949	AX-90796949	11159770	Haplotype_probs	12	Haplotype_probs
5.24817	7.37814	0.711313	HAPGRP_1	male_flowering_d6_BLOIS_2017_OPT_qDTA3_2	AX-90834914	AX-90834914	160426458	Haplotype_probs	13	Haplotype_probs
0.503247	8.71161	0.0577674	HAPGRP_2	male_flowering_d6_BLOIS_2017_OPT_qDTA3_2	AX-90834914	AX-90834914	160426458	Haplotype_probs	13	Haplotype_probs
-24.7952	4.731	-5.24101	HAPGRP_3	male_flowering_d6_BLOIS_2017_OPT_qDTA3_2	AX-90834914	AX-90834914	160426458	Haplotype_probs	13	Haplotype_probs
-21.0566	7.88381	-2.67087	HAPGRP_4	male_flowering_d6_BLOIS_2017_OPT_qDTA3_2	AX-90834914	AX-90834914	160426458	Haplotype_probs	13	Haplotype_probs
9.39102	5.44074	1.72606	HAPGRP_5	male_flowering_d6_BLOIS_2017_OPT_qDTA3_2	AX-90834914	AX-90834914	160426458	Haplotype_probs	13	Haplotype_probs
-2.08183	8.31607	-0.250338	HAPGRP_6	male_flowering_d6_BLOIS_2017_OPT_qDTA3_2	AX-90834914	AX-90834914	160426458	Haplotype_probs	13	Haplotype_probs
-7.14362	6.0686	-1.17714	HAPGRP_7	male_flowering_d6_BLOIS_2017_OPT_qDTA3_2	AX-90834914	AX-90834914	160426458	Haplotype_probs	13	Haplotype_probs
-3.23606	4.57467	-0.707387	HAPGRP_8	male_flowering_d6_BLOIS_2017_OPT_qDTA3_2	AX-90834914	AX-90834914	160426458	Haplotype_probs	13	Haplotype_probs
5.79065	8.06257	0.718213	HAPGRP_9	male_flowering_d6_BLOIS_2017_OPT_qDTA3_2	AX-90834914	AX-90834914	160426458	Haplotype_probs	13	Haplotype_probs
21.5722	4.96076	4.34856	HAPGRP_10	male_flowering_d6_BLOIS_2017_OPT_qDTA3_2	AX-90834914	AX-90834914	160426458	Haplotype_probs	13	Haplotype_probs
4.36824	3.82632	1.14163	HAPGRP_11	male_flowering_d6_BLOIS_2017_OPT_qDTA3_2	AX-90834914	AX-90834914	160426458	Haplotype_probs	13	Haplotype_probs
5.6167	5.81819	0.965369	HAPGRP_12	male_flowering_d6_BLOIS_2017_OPT_qDTA3_2	AX-90834914	AX-90834914	160426458	Haplotype_probs	13	Haplotype_probs
0.403363	6.44073	0.0626269	HAPGRP_13	male_flowering_d6_BLOIS_2017_OPT_qDTA3_2	AX-90834914	AX-90834914	160426458	Haplotype_probs	13	Haplotype_probs
8.82688	5.16885	1.70771	HAPGRP_1	male_flowering_d6_BLOIS_2017_OPT_qDTA8	AX-91106190	AX-91106190	147721206	Haplotype_probs	16	Haplotype_probs
12.1942	5.70596	2.1371	HAPGRP_2	male_flowering_d6_BLOIS_2017_OPT_qDTA8	AX-91106190	AX-91106190	147721206	Haplotype_probs	16	Haplotype_probs
-13.5884	5.38399	-2.52386	HAPGRP_3	male_flowering_d6_BLOIS_2017_OPT_qDTA8	AX-91106190	AX-91106190	147721206	Haplotype_probs	16	Haplotype_probs
5.72769	6.16599	0.928917	HAPGRP_4	male_flowering_d6_BLOIS_2017_OPT_qDTA8	AX-91106190	AX-91106190	147721206	Haplotype_probs	16	Haplotype_probs
13.0257	6.36871	2.04526	HAPGRP_5	male_flowering_d6_BLOIS_2017_OPT_qDTA8	AX-91106190	AX-91106190	147721206	Haplotype_probs	16	Haplotype_probs
0.599371	5.77836	0.103727	HAPGRP_6	male_flowering_d6_BLOIS_2017_OPT_qDTA8	AX-91106190	AX-91106190	147721206	Haplotype_probs	16	Haplotype_probs
-4.62975	6.03328	-0.767369	HAPGRP_7	male_flowering_d6_BLOIS_2017_OPT_qDTA8	AX-91106190	AX-91106190	147721206	Haplotype_probs	16	Haplotype_probs
11.1205	7.10181	1.56587	HAPGRP_8	male_flowering_d6_BLOIS_2017_OPT_qDTA8	AX-91106190	AX-91106190	147721206	Haplotype_probs	16	Haplotype_probs
-19.5662	7.00272	-2.79409	HAPGRP_9	male_flowering_d6_BLOIS_2017_OPT_qDTA8	AX-91106190	AX-91106190	147721206	Haplotype_probs	16	Haplotype_probs
-13.6402	5.22088	-2.61263	HAPGRP_10	male_flowering_d6_BLOIS_2017_OPT_qDTA8	AX-91106190	AX-91106190	147721206	Haplotype_probs	16	Haplotype_probs
-21.1113	6.87643	-3.0701	HAPGRP_11	male_flowering_d6_BLOIS_2017_OPT_qDTA8	AX-91106190	AX-91106190	147721206	Haplotype_probs	16	Haplotype_probs
26.4747	11.0253	2.40127	HAPGRP_12	male_flowering_d6_BLOIS_2017_OPT_qDTA8	AX-91106190	AX-91106190	147721206	Haplotype_probs	16	Haplotype_probs
-5.88254	5.45275	-1.07882	HAPGRP_13	male_flowering_d6_BLOIS_2017_OPT_qDTA8	AX-91106190	AX-91106190	147721206	Haplotype_probs	16	Haplotype_probs
9.05008	8.61222	1.05084	HAPGRP_14	male_flowering_d6_BLOIS_2017_OPT_qDTA8	AX-91106190	AX-91106190	147721206	Haplotype_probs	16	Haplotype_probs
-6.64462	9.48896	-0.700247	HAPGRP_15	male_flowering_d6_BLOIS_2017_OPT_qDTA8	AX-91106190	AX-91106190	147721206	Haplotype_probs	16	Haplotype_probs
17.7413	6.29492	2.81836	HAPGRP_16	male_flowering_d6_BLOIS_2017_OPT_qDTA8	AX-91106190	AX-91106190	147721206	Haplotype_probs	16	Haplotype_probs
8.90434	6.34151	1.40414	HAPGRP_1	male_flowering_d6_GRANEROS_2015_OPT_qDTA3_2	AX-90835099	AX-91583440	161296968	Haplotype_probs	16	600K_SNP
-3.4061	7.92199	-0.429955	HAPGRP_2	male_flowering_d6_GRANEROS_2015_OPT_qDTA3_2	AX-90835099	AX-91583440	161296968	Haplotype_probs	16	600K_SNP
-10.3674	6.17357	-1.67931	HAPGRP_3	male_flowering_d6_GRANEROS_2015_OPT_qDTA3_2	AX-90835099	AX-91583440	161296968	Haplotype_probs	16	600K_SNP
-18.5385	6.86772	-2.69937	HAPGRP_4	male_flowering_d6_GRANEROS_2015_OPT_qDTA3_2	AX-90835099	AX-91583440	161296968	Haplotype_probs	16	600K_SNP
13.1192	4.88354	2.68642	HAPGRP_5	male_flowering_d6_GRANEROS_2015_OPT_qDTA3_2	AX-90835099	AX-91583440	161296968	Haplotype_probs	16	600K_SNP
-7.85849	7.00625	-1.12164	HAPGRP_6	male_flowering_d6_GRANEROS_2015_OPT_qDTA3_2	AX-90835099	AX-91583440	161296968	Haplotype_probs	16	600K_SNP
-8.5189	5.71005	-1.49191	HAPGRP_7	male_flowering_d6_GRANEROS_2015_OPT_qDTA3_2	AX-90835099	AX-91583440	161296968	Haplotype_probs	16	600K_SNP
-0.612583	5.01957	-0.122039	HAPGRP_8	male_flowering_d6_GRANEROS_2015_OPT_qDTA3_2	AX-90835099	AX-91583440	161296968	Haplotype_probs	16	600K_SNP
-22.99	5.74116	-4.00441	HAPGRP_9	male_flowering_d6_GRANEROS_2015_OPT_qDTA3_2	AX-90835099	AX-91583440	161296968	Haplotype_probs	16	600K_SNP
-7.63577	6.65817	-1.14683	HAPGRP_10	male_flowering_d6_GRANEROS_2015_OPT_qDTA3_2	AX-90835099	AX-91583440	161296968	Haplotype_probs	16	600K_SNP
-1.47204	8.25165	-0.178394	HAPGRP_11	male_flowering_d6_GRANEROS_2015_OPT_qDTA3_2	AX-90835099	AX-91583440	161296968	Haplotype_probs	16	600K_SNP
25.1048	4.52039	5.55368	HAPGRP_12	male_flowering_d6_GRANEROS_2015_OPT_qDTA3_2	AX-90835099	AX-91583440	161296968	Haplotype_probs	16	600K_SNP
1.80637	4.28611	0.421449	HAPGRP_13	male_flowering_d6_GRANEROS_2015_OPT_qDTA3_2	AX-90835099	AX-91583440	161296968	Haplotype_probs	16	600K_SNP
0.582565	5.00394	0.116421	HAPGRP_14	male_flowering_d6_GRANEROS_2015_OPT_qDTA3_2	AX-90835099	AX-91583440	161296968	Haplotype_probs	16	600K_SNP
2.33324	5.71076	0.408569	HAPGRP_15	male_flowering_d6_GRANEROS_2015_OPT_qDTA3_2	AX-90835099	AX-91583440	161296968	Haplotype_probs	16	600K_SNP
-3.49091	5.82393	-0.599408	HAPGRP_16	male_flowering_d6_GRANEROS_2015_OPT_qDTA3_2	AX-90835099	AX-91583440	161296968	Haplotype_probs	16	600K_SNP
3.53777	4.06999	0.869233	HAPGRP_1	male_flowering_d6_GRANEROS_2015_OPT_qDTA7	AX-91026083	AX-91437127	15643214	Haplotype_probs	13	600K_SNP
-6.72314	5.74692	-1.16987	HAPGRP_2	male_flowering_d6_GRANEROS_2015_OPT_qDTA7	AX-91026083	AX-91437127	15643214	Haplotype_probs	13	600K_SNP
2.25588	3.88166	0.581163	HAPGRP_3	male_flowering_d6_GRANEROS_2015_OPT_qDTA7	AX-91026083	AX-91437127	15643214	Haplotype_probs	13	600K_SNP
0.789169	4.17619	0.188969	HAPGRP_4	male_flowering_d6_GRANEROS_2015_OPT_qDTA7	AX-91026083	AX-91437127	15643214	Haplotype_probs	13	600K_SNP
3.25799	4.04029	0.806376	HAPGRP_5	male_flowering_d6_GRANEROS_2015_OPT_qDTA7	AX-91026083	AX-91437127	15643214	Haplotype_probs	13	600K_SNP
10.781	5.66528	1.90299	HAPGRP_6	male_flowering_d6_GRANEROS_2015_OPT_qDTA7	AX-91026083	AX-91437127	15643214	Haplotype_probs	13	600K_SNP
2.8983	5.5303	0.524076	HAPGRP_7	male_flowering_d6_GRANEROS_2015_OPT_qDTA7	AX-91026083	AX-91437127	15643214	Haplotype_probs	13	600K_SNP
17.1544	7.86347	2.18153	HAPGRP_8	male_flowering_d6_GRANEROS_2015_OPT_qDTA7	AX-91026083	AX-91437127	15643214	Haplotype_probs	13	600K_SNP
-4.51564	5.97825	-0.755345	HAPGRP_9	male_flowering_d6_GRANEROS_2015_OPT_qDTA7	AX-91026083	AX-91437127	15643214	Haplotype_probs	13	600K_SNP
-28.5155	5.20849	-5.47481	HAPGRP_10	male_flowering_d6_GRANEROS_2015_OPT_qDTA7	AX-91026083	AX-91437127	15643214	Haplotype_probs	13	600K_SNP
6.46807	4.51089	1.43388	HAPGRP_11	male_flowering_d6_GRANEROS_2015_OPT_qDTA7	AX-91026083	AX-91437127	15643214	Haplotype_probs	13	600K_SNP
-4.07451	5.18444	-0.785911	HAPGRP_12	male_flowering_d6_GRANEROS_2015_OPT_qDTA7	AX-91026083	AX-91437127	15643214	Haplotype_probs	13	600K_SNP
-5.67952	6.70203	-0.847434	HAPGRP_13	male_flowering_d6_GRANEROS_2015_OPT_qDTA7	AX-91026083	AX-91437127	15643214	Haplotype_probs	13	600K_SNP
14.2872	3.85368	3.70741	HAPGRP_1	male_flowering_d6_GRANEROS_2015_OPT_qDTA8	AX-91103301	AX-91103316	137170932	Haplotype_probs	14	600K_SNP
12.9072	7.18926	1.79535	HAPGRP_2	male_flowering_d6_GRANEROS_2015_OPT_qDTA8	AX-91103301	AX-91103316	137170932	Haplotype_probs	14	600K_SNP
-9.49459	3.10244	-3.06036	HAPGRP_3	male_flowering_d6_GRANEROS_2015_OPT_qDTA8	AX-91103301	AX-91103316	137170932	Haplotype_probs	14	600K_SNP
7.79553	6.70249	1.16308	HAPGRP_4	male_flowering_d6_GRANEROS_2015_OPT_qDTA8	AX-91103301	AX-91103316	137170932	Haplotype_probs	14	600K_SNP
-6.83717	3.57054	-1.91488	HAPGRP_6	male_flowering_d6_GRANEROS_2015_OPT_qDTA8	AX-91103301	AX-91103316	137170932	Haplotype_probs	14	600K_SNP
-2.55232	5.41539	-0.471309	HAPGRP_7	male_flowering_d6_GRANEROS_2015_OPT_qDTA8	AX-91103301	AX-91103316	137170932	Haplotype_probs	14	600K_SNP
7.83867	5.65677	1.38572	HAPGRP_8	male_flowering_d6_GRANEROS_2015_OPT_qDTA8	AX-91103301	AX-91103316	137170932	Haplotype_probs	14	600K_SNP
-17.0681	5.34594	-3.19272	HAPGRP_9	male_flowering_d6_GRANEROS_2015_OPT_qDTA8	AX-91103301	AX-91103316	137170932	Haplotype_probs	14	600K_SNP
-2.55179	6.28013	-0.406327	HAPGRP_10	male_flowering_d6_GRANEROS_2015_OPT_qDTA8	AX-91103301	AX-91103316	137170932	Haplotype_probs	14	600K_SNP
24.5515	10.4585	2.34752	HAPGRP_11	male_flowering_d6_GRANEROS_2015_OPT_qDTA8	AX-91103301	AX-91103316	137170932	Haplotype_probs	14	600K_SNP
7.97068	7.80526	1.02119	HAPGRP_12	male_flowering_d6_GRANEROS_2015_OPT_qDTA8	AX-91103301	AX-91103316	137170932	Haplotype_probs	14	600K_SNP
-18.1624	7.03479	-2.5818	HAPGRP_13	male_flowering_d6_GRANEROS_2015_OPT_qDTA8	AX-91103301	AX-91103316	137170932	Haplotype_probs	14	600K_SNP
18.9544	6.37076	2.97522	HAPGRP_14	male_flowering_d6_GRANEROS_2015_OPT_qDTA8	AX-91103301	AX-91103316	137170932	Haplotype_probs	14	600K_SNP
8.90434	6.34151	1.40414	HAPGRP_1	male_flowering_d6_GRANEROS_2015_OPT_qDTA3_2	AX-90835093	AX-91583440	161293416	Haplotype_probs	16	Founder_probs
-3.4061	7.92199	-0.429955	HAPGRP_2	male_flowering_d6_GRANEROS_2015_OPT_qDTA3_2	AX-90835093	AX-91583440	161293416	Haplotype_probs	16	Founder_probs
-10.3674	6.17357	-1.67931	HAPGRP_3	male_flowering_d6_GRANEROS_2015_OPT_qDTA3_2	AX-90835093	AX-91583440	161293416	Haplotype_probs	16	Founder_probs
-18.5385	6.86772	-2.69937	HAPGRP_4	male_flowering_d6_GRANEROS_2015_OPT_qDTA3_2	AX-90835093	AX-91583440	161293416	Haplotype_probs	16	Founder_probs
13.1192	4.88354	2.68642	HAPGRP_5	male_flowering_d6_GRANEROS_2015_OPT_qDTA3_2	AX-90835093	AX-91583440	161293416	Haplotype_probs	16	Founder_probs
-7.85849	7.00625	-1.12164	HAPGRP_6	male_flowering_d6_GRANEROS_2015_OPT_qDTA3_2	AX-90835093	AX-91583440	161293416	Haplotype_probs	16	Founder_probs
-8.5189	5.71005	-1.49191	HAPGRP_7	male_flowering_d6_GRANEROS_2015_OPT_qDTA3_2	AX-90835093	AX-91583440	161293416	Haplotype_probs	16	Founder_probs
-0.612583	5.01957	-0.122039	HAPGRP_8	male_flowering_d6_GRANEROS_2015_OPT_qDTA3_2	AX-90835093	AX-91583440	161293416	Haplotype_probs	16	Founder_probs
-22.99	5.74116	-4.00441	HAPGRP_9	male_flowering_d6_GRANEROS_2015_OPT_qDTA3_2	AX-90835093	AX-91583440	161293416	Haplotype_probs	16	Founder_probs
-7.63577	6.65817	-1.14683	HAPGRP_10	male_flowering_d6_GRANEROS_2015_OPT_qDTA3_2	AX-90835093	AX-91583440	161293416	Haplotype_probs	16	Founder_probs
-1.47204	8.25165	-0.178394	HAPGRP_11	male_flowering_d6_GRANEROS_2015_OPT_qDTA3_2	AX-90835093	AX-91583440	161293416	Haplotype_probs	16	Founder_probs
25.1048	4.52039	5.55368	HAPGRP_12	male_flowering_d6_GRANEROS_2015_OPT_qDTA3_2	AX-90835093	AX-91583440	161293416	Haplotype_probs	16	Founder_probs
1.80637	4.28611	0.421449	HAPGRP_13	male_flowering_d6_GRANEROS_2015_OPT_qDTA3_2	AX-90835093	AX-91583440	161293416	Haplotype_probs	16	Founder_probs
0.582565	5.00394	0.116421	HAPGRP_14	male_flowering_d6_GRANEROS_2015_OPT_qDTA3_2	AX-90835093	AX-91583440	161293416	Haplotype_probs	16	Founder_probs
2.33324	5.71076	0.408569	HAPGRP_15	male_flowering_d6_GRANEROS_2015_OPT_qDTA3_2	AX-90835093	AX-91583440	161293416	Haplotype_probs	16	Founder_probs
-3.49091	5.82393	-0.599408	HAPGRP_16	male_flowering_d6_GRANEROS_2015_OPT_qDTA3_2	AX-90835093	AX-91583440	161293416	Haplotype_probs	16	Founder_probs
1.50541	4.38711	0.343144	HAPGRP_1	male_flowering_d6_GRANEROS_2015_OPT_qDTA7	AX-91715233	AX-91715233	14405491	Haplotype_probs	16	Founder_probs
23.4446	11.1614	2.10051	HAPGRP_2	male_flowering_d6_GRANEROS_2015_OPT_qDTA7	AX-91715233	AX-91715233	14405491	Haplotype_probs	16	Founder_probs
-5.66611	5.74493	-0.98628	HAPGRP_3	male_flowering_d6_GRANEROS_2015_OPT_qDTA7	AX-91715233	AX-91715233	14405491	Haplotype_probs	16	Founder_probs
12.2692	6.25993	1.95995	HAPGRP_4	male_flowering_d6_GRANEROS_2015_OPT_qDTA7	AX-91715233	AX-91715233	14405491	Haplotype_probs	16	Founder_probs
0.901673	4.37128	0.206272	HAPGRP_5	male_flowering_d6_GRANEROS_2015_OPT_qDTA7	AX-91715233	AX-91715233	14405491	Haplotype_probs	16	Founder_probs
3.86144	5.359	0.720551	HAPGRP_6	male_flowering_d6_GRANEROS_2015_OPT_qDTA7	AX-91715233	AX-91715233	14405491	Haplotype_probs	16	Founder_probs
9.58101	5.47203	1.7509	HAPGRP_7	male_flowering_d6_GRANEROS_2015_OPT_qDTA7	AX-91715233	AX-91715233	14405491	Haplotype_probs	16	Founder_probs
3.01687	5.51574	0.546956	HAPGRP_8	male_flowering_d6_GRANEROS_2015_OPT_qDTA7	AX-91715233	AX-91715233	14405491	Haplotype_probs	16	Founder_probs
[truncated: 434 more rows]
