# Supplementary material
Source: publisher figshare collection journal article supplement (https://gsajournals.figshare.com/articles/dataset/_/14903283)

Founder Effect Sizes male\_flowering\_d6\_BLOIS\_2014\_OPT\_qDTA8

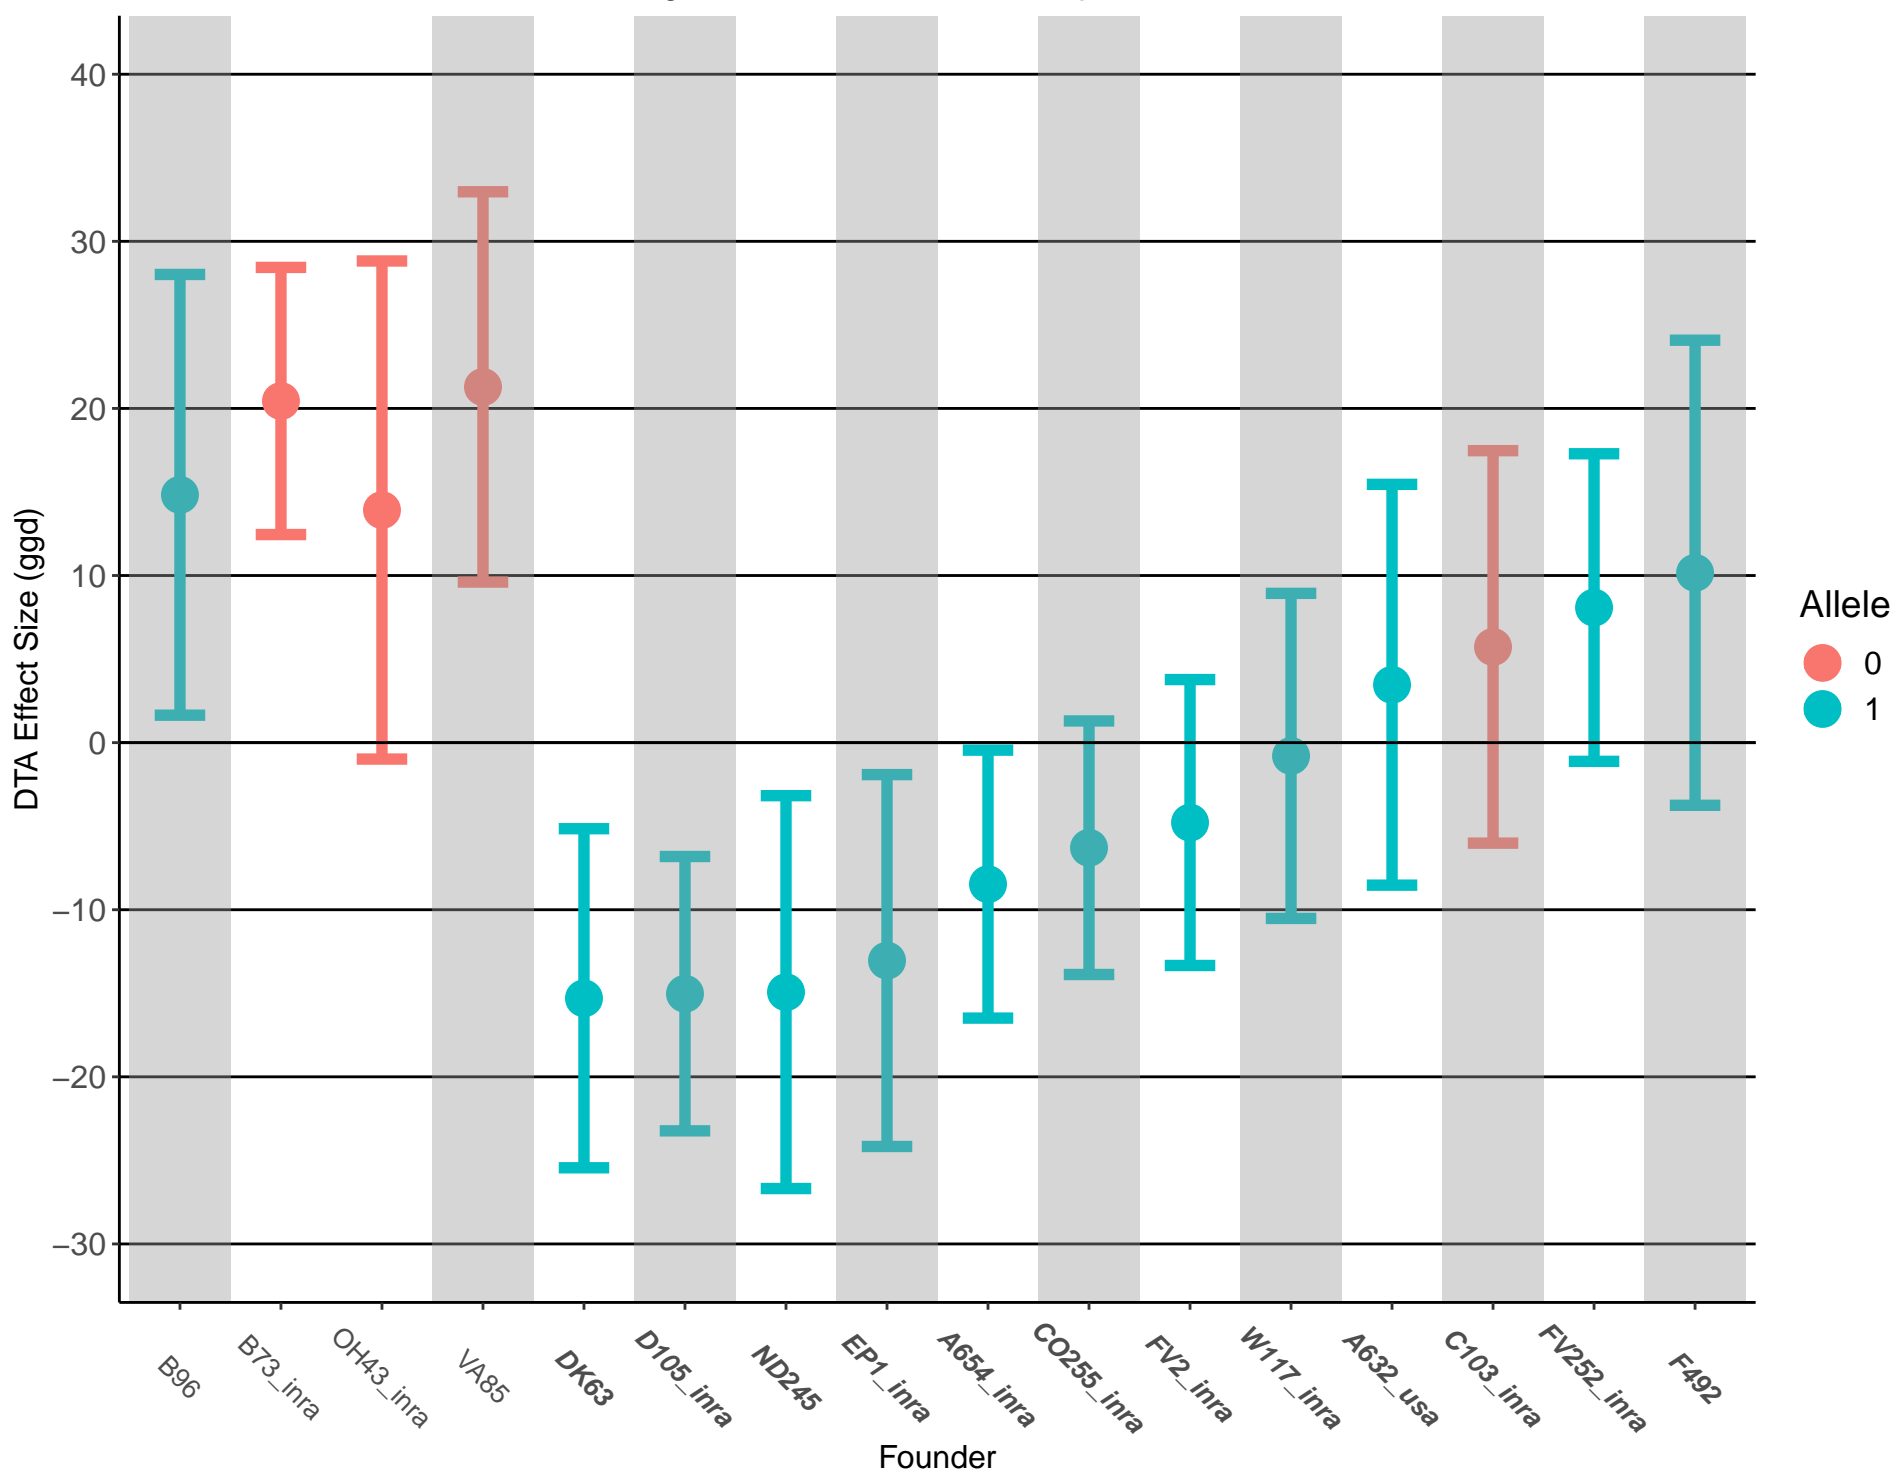

Founder Effect Sizes male\_flowering\_d6\_BLOIS\_2017\_OPT\_qDTA8

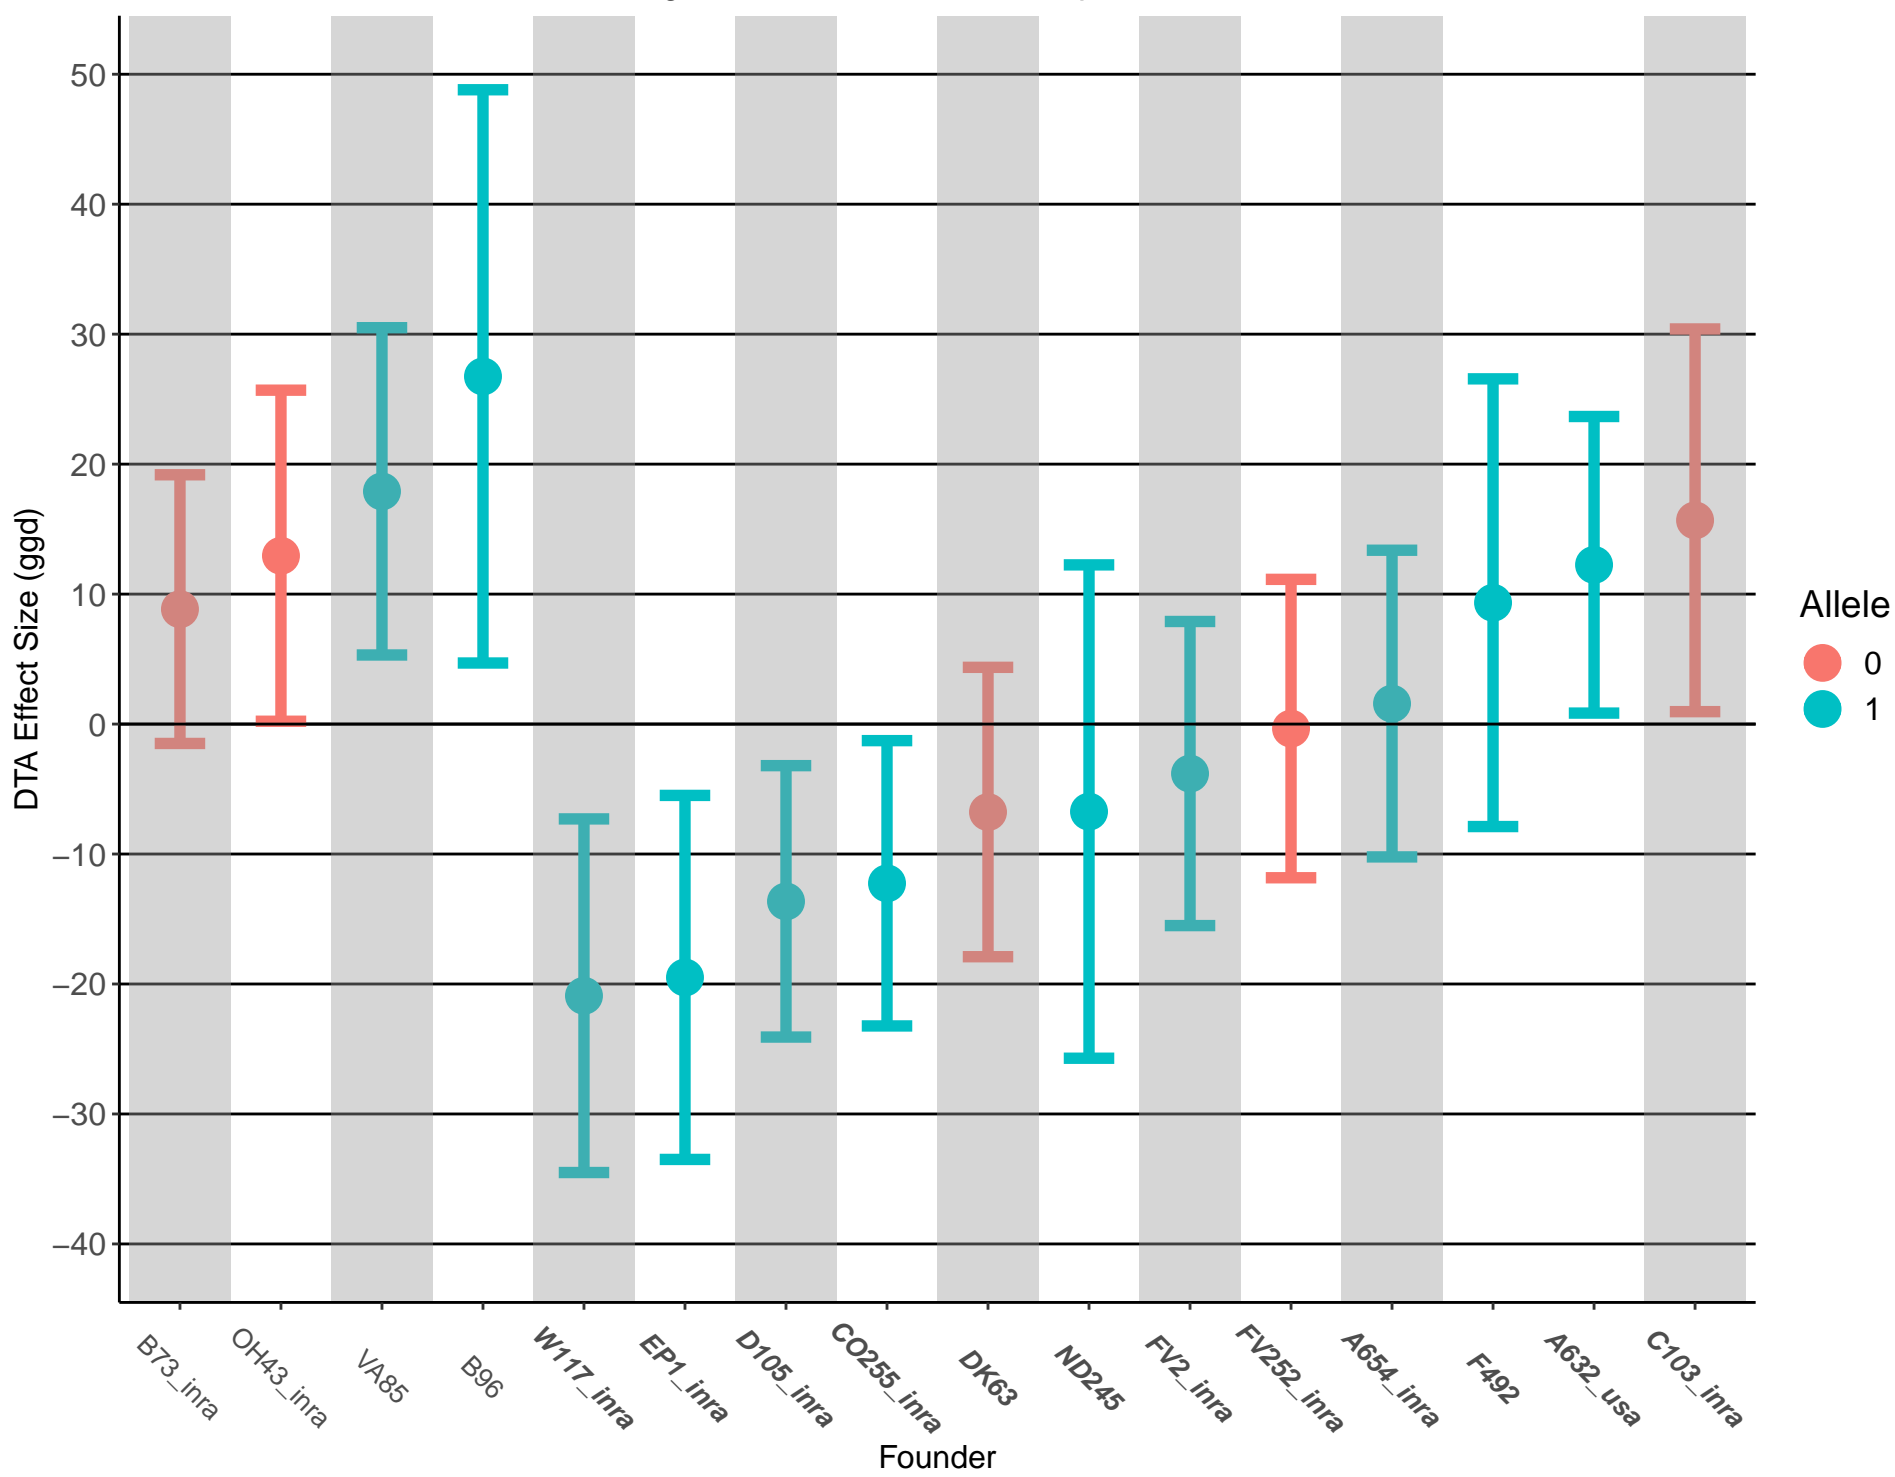

Founder Effect Sizes male\_flowering\_d6\_GRANEROS\_2015\_OPT\_qDTA8

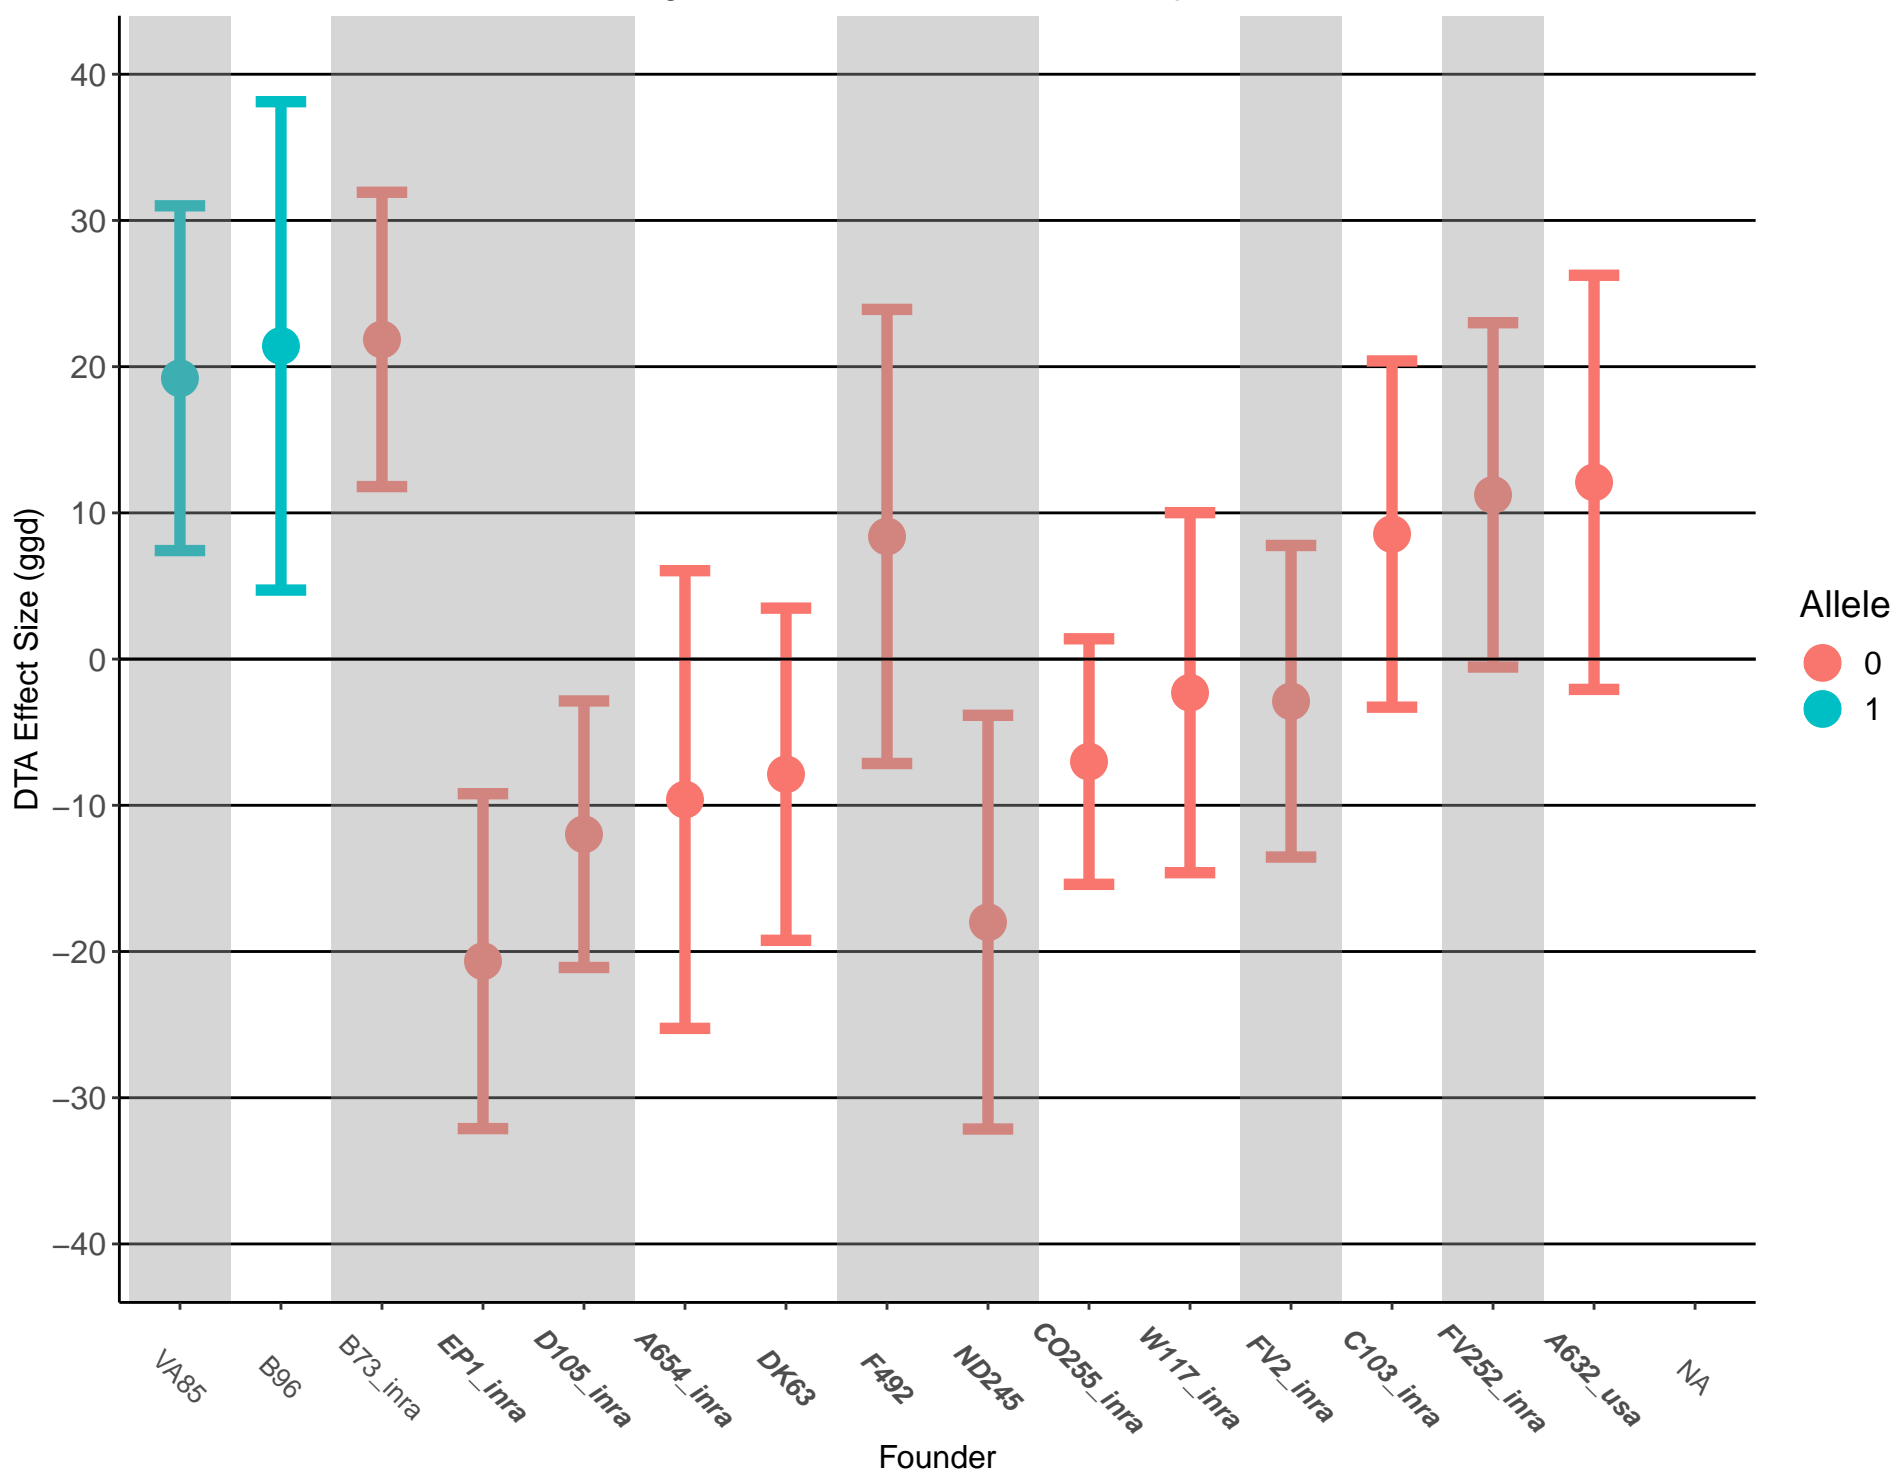

Founder Effect Sizes male\_flowering\_d6\_NERAC\_2016\_WD\_qDTA8

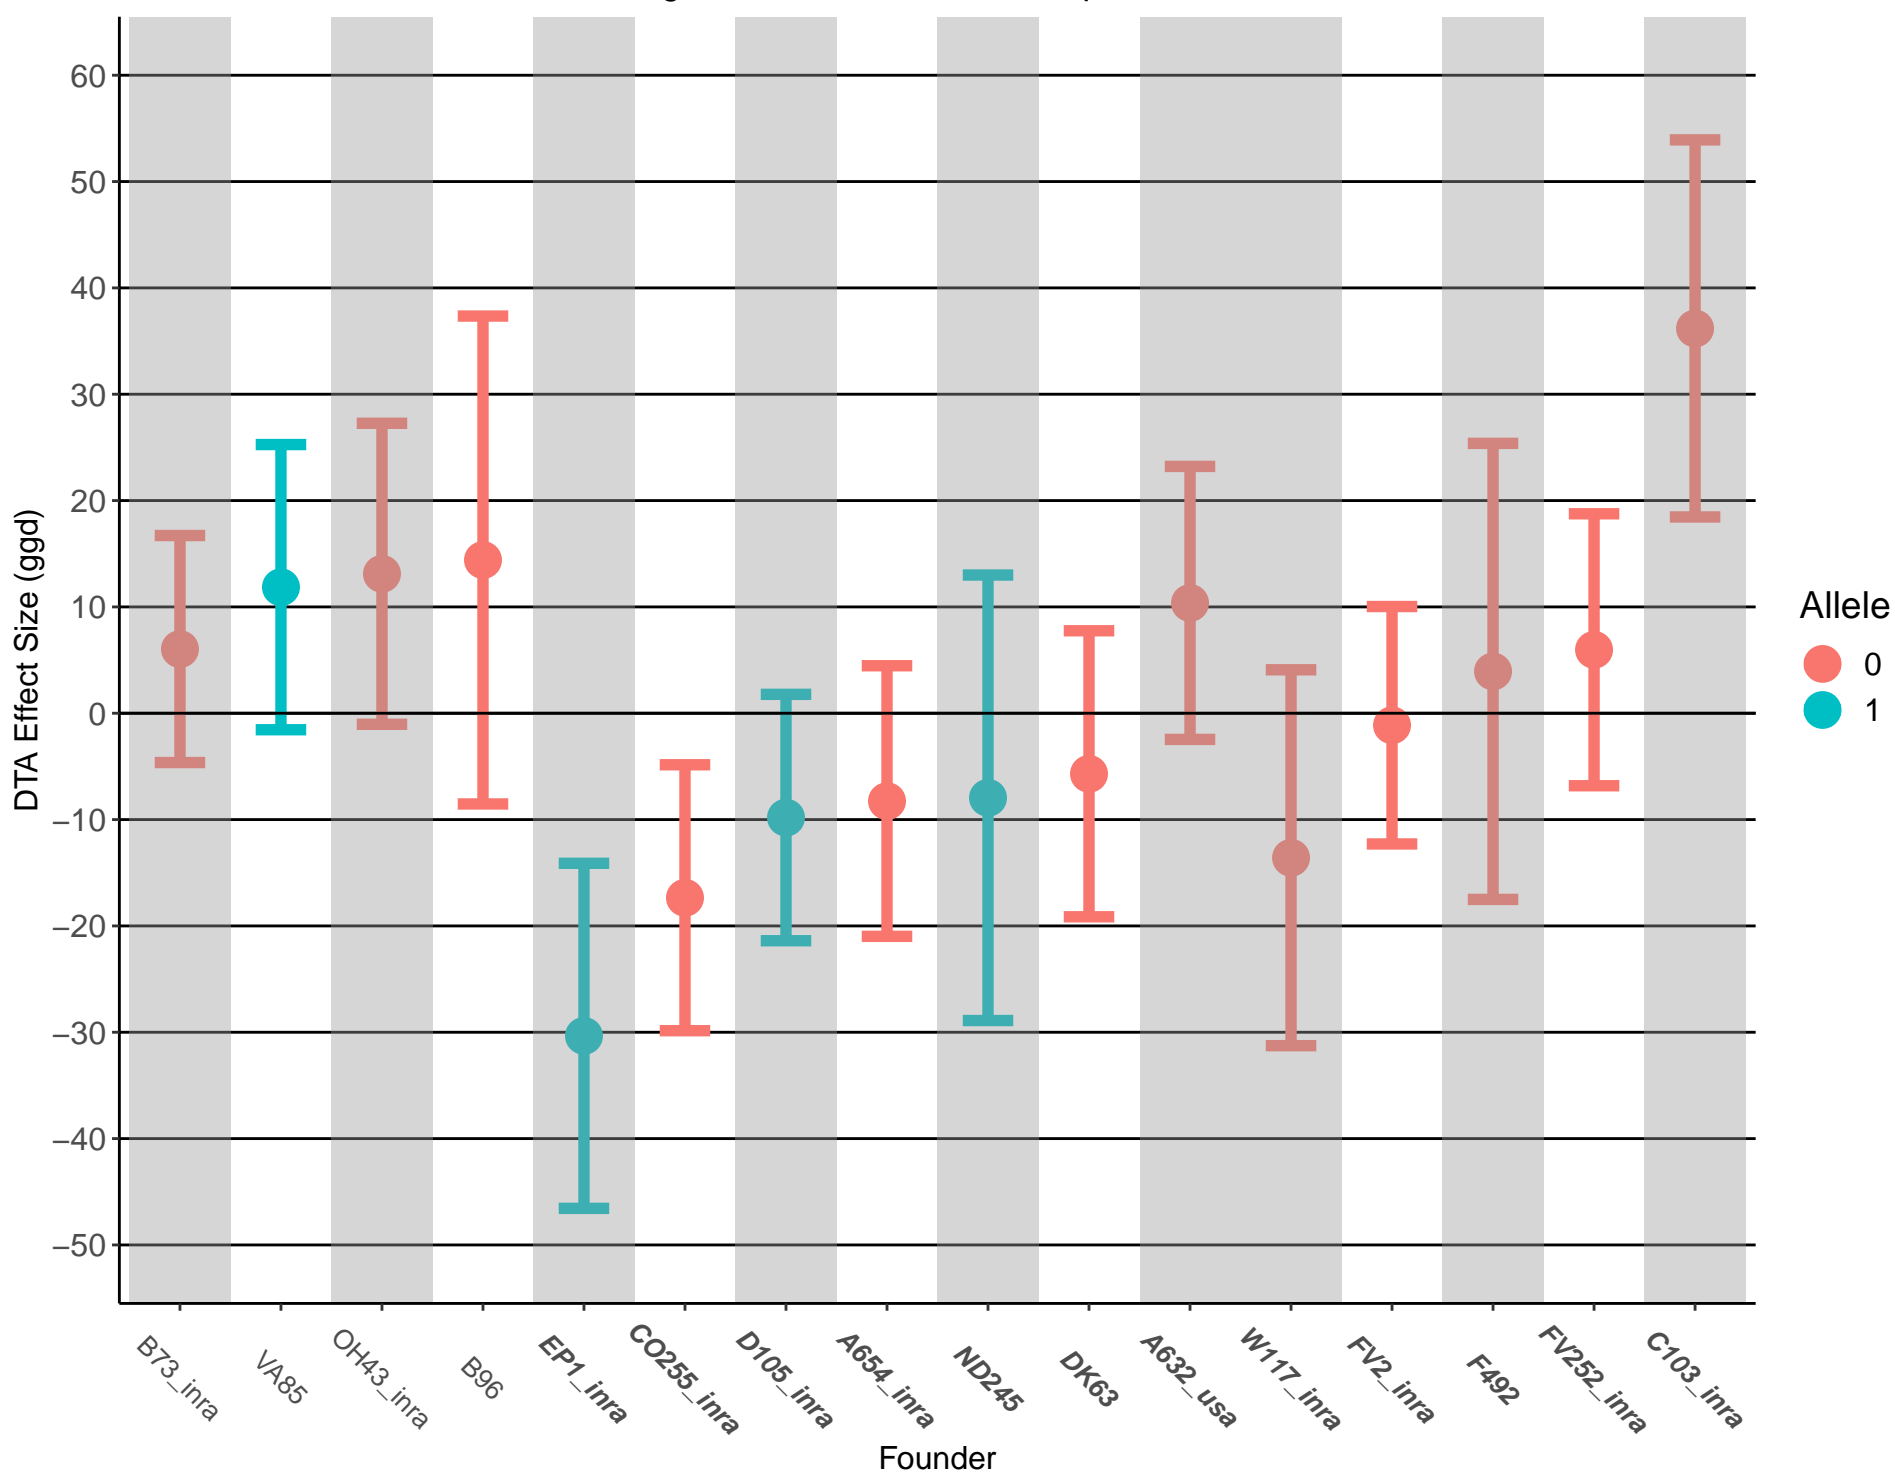

Founder Effect Sizes male\_flowering\_d6\_SZEGED\_2017\_OPT\_qDTA8

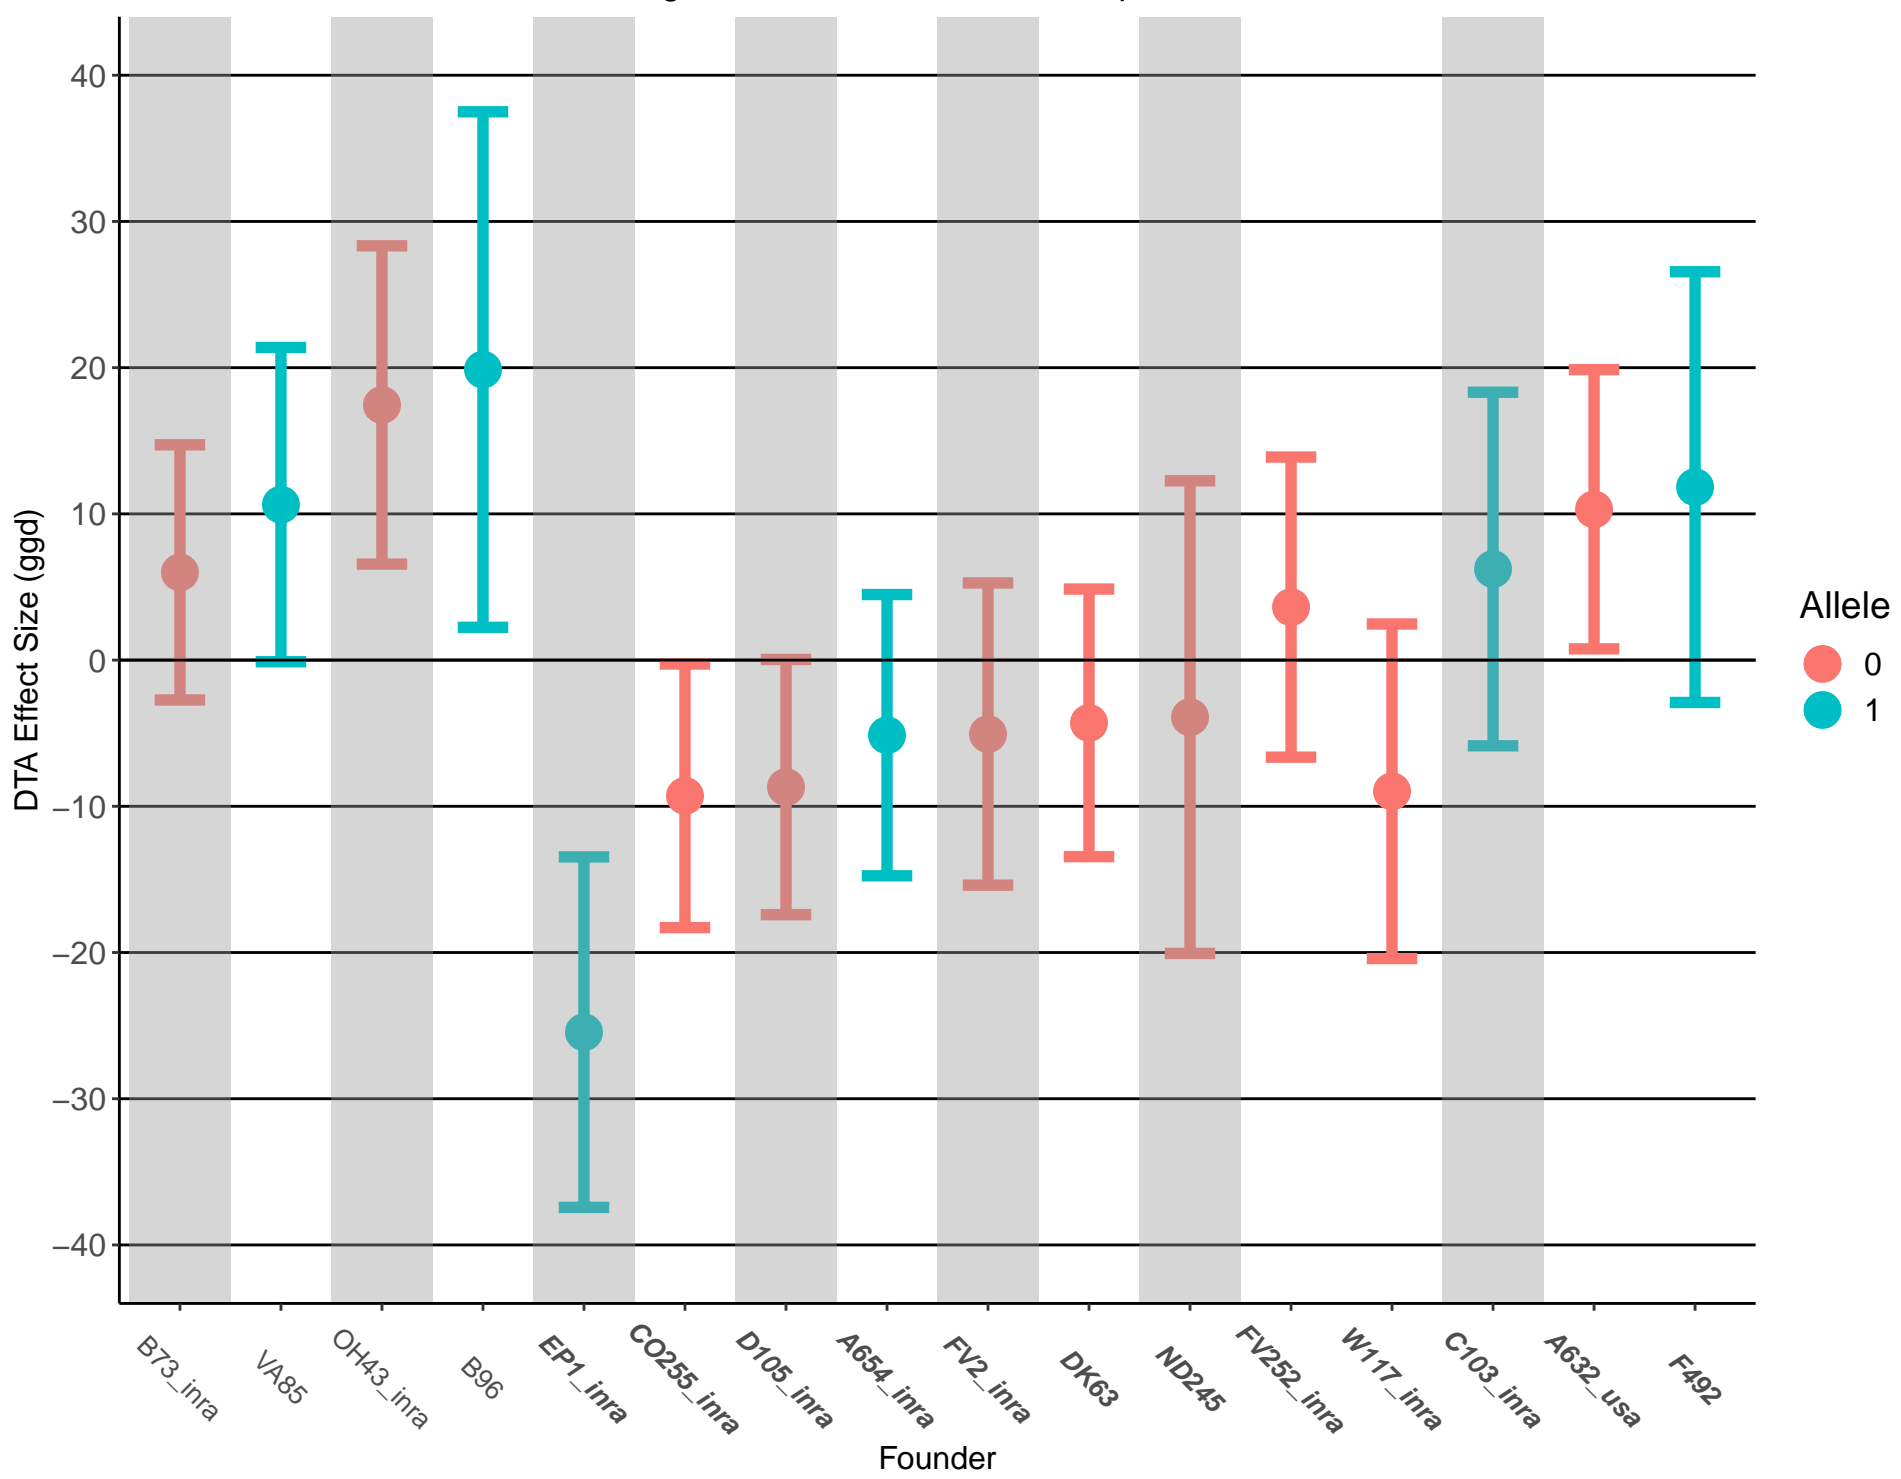

Founder Effect Sizes male\_flowering\_d6\_STPAUL\_2017\_WD\_qDTA8

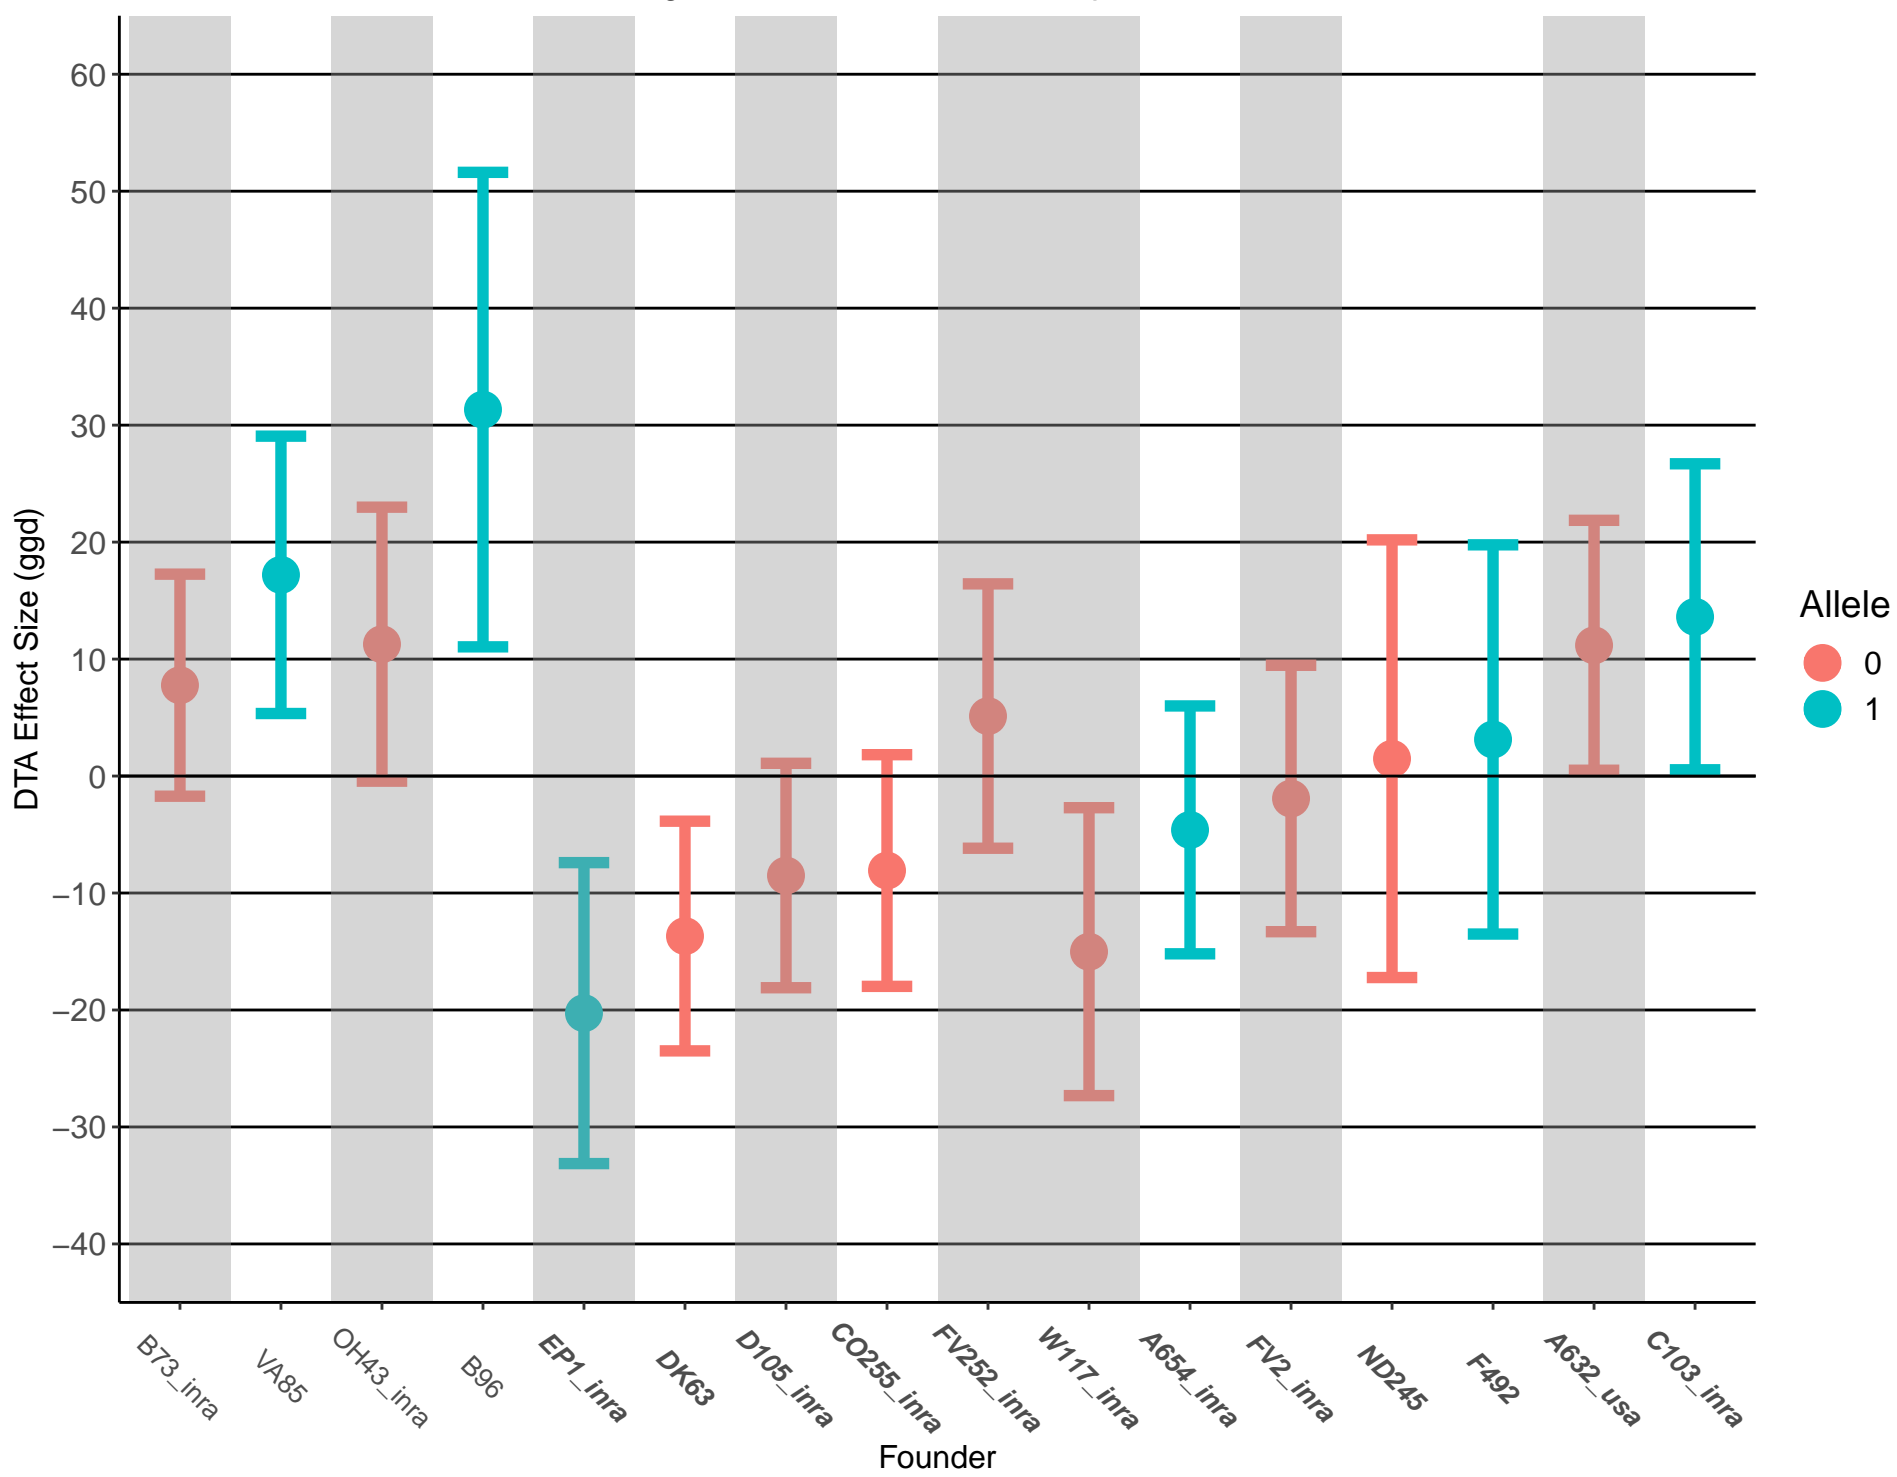

Supplement: Supplementary file 2 [file 1]
