# Supplementary material
Source: publisher figshare collection journal article supplement (https://gsajournals.figshare.com/articles/dataset/_/14903283)
Supplement: Supplementary file 3 [file 1]

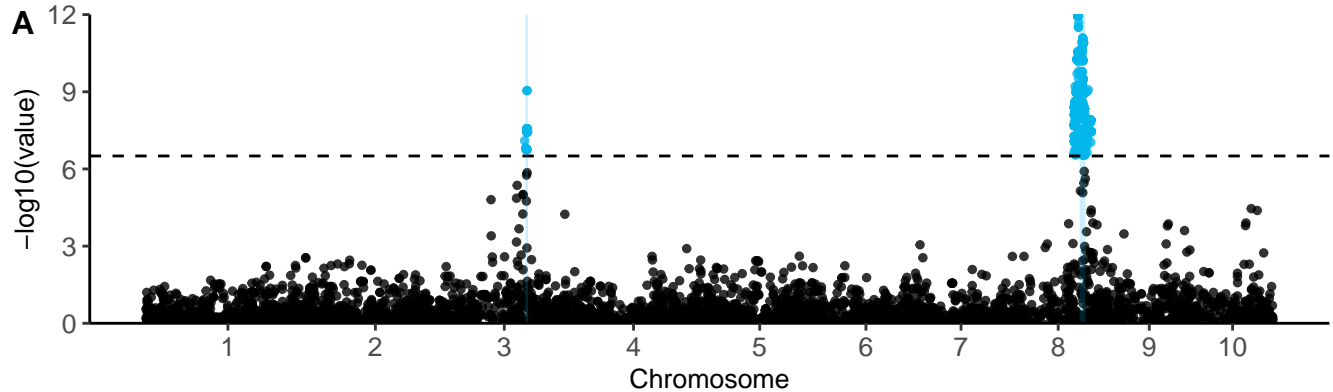

GWAS SNP BLOIS\_2014\_OPT male\_flowering\_d6

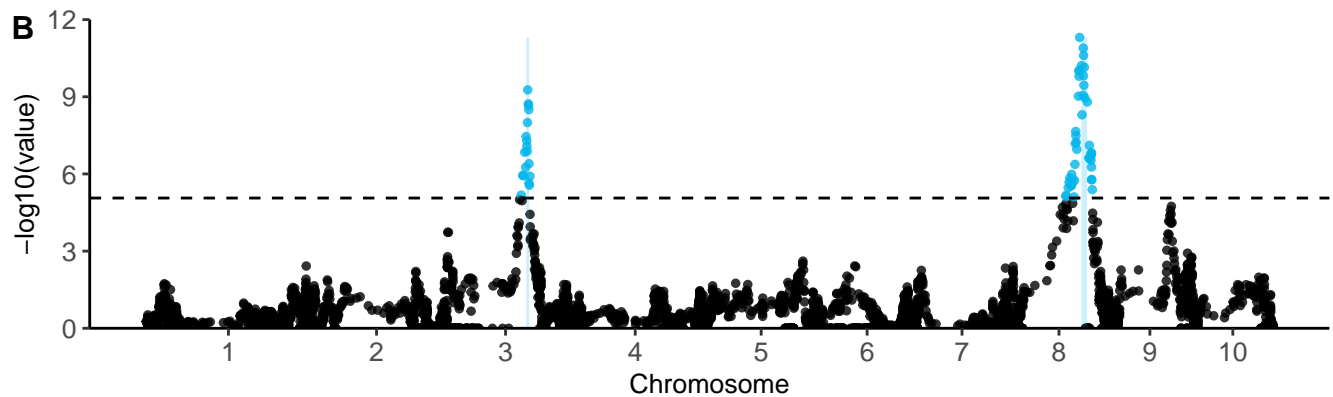

QTL F BLOIS\_2014\_OPT male\_flowering\_d6

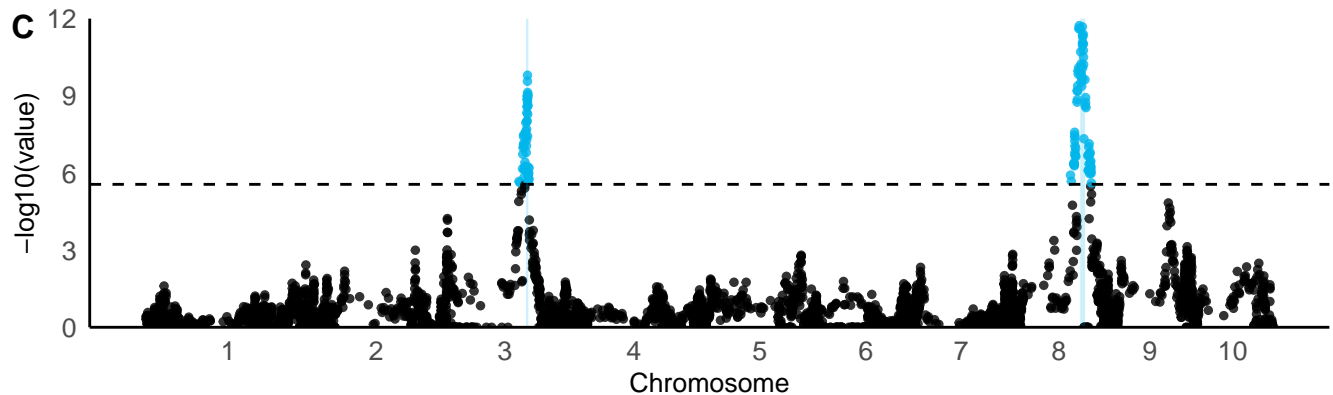

QTL H BLOIS\_2014\_OPT male\_flowering\_d6

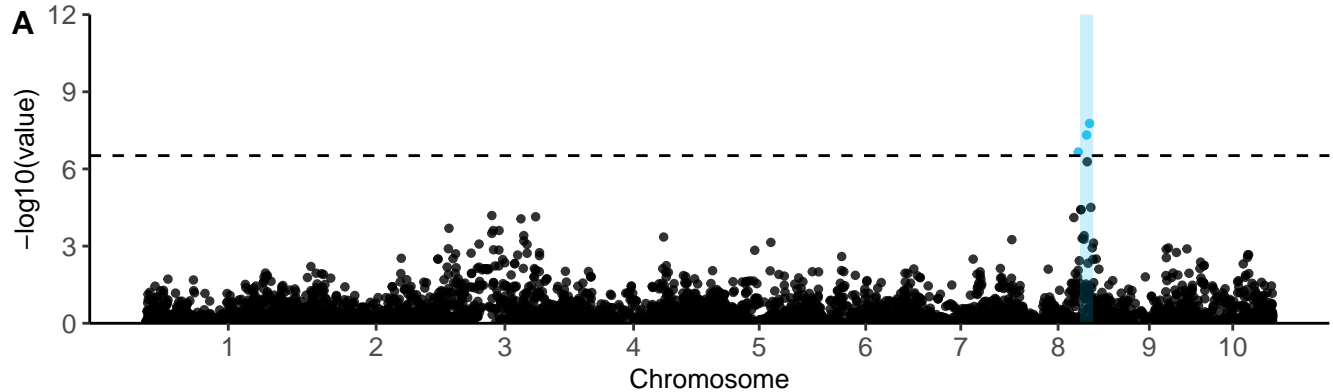

GWAS SNP BLOIS\_2017\_OPT male\_flowering\_d6

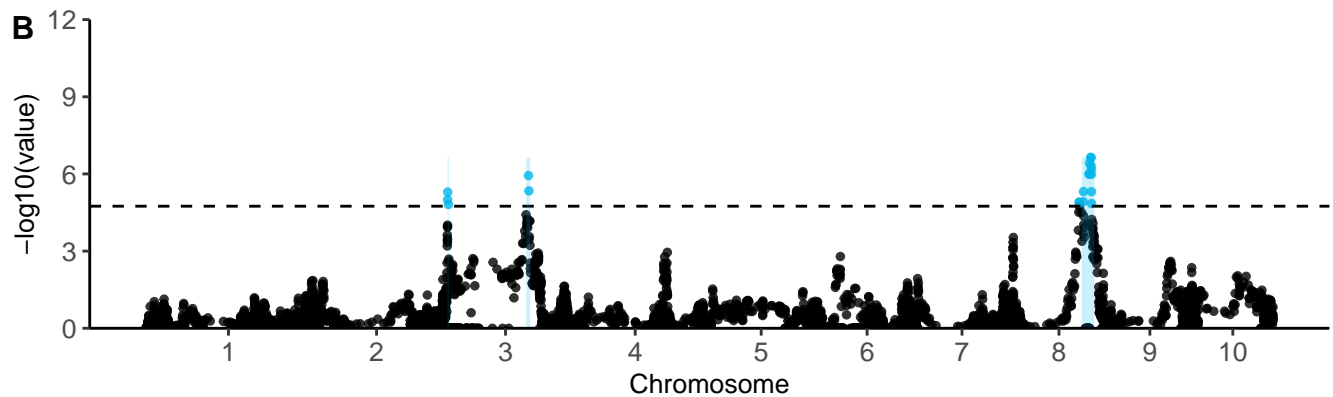

QTL F BLOIS\_2017\_OPT male\_flowering\_d6

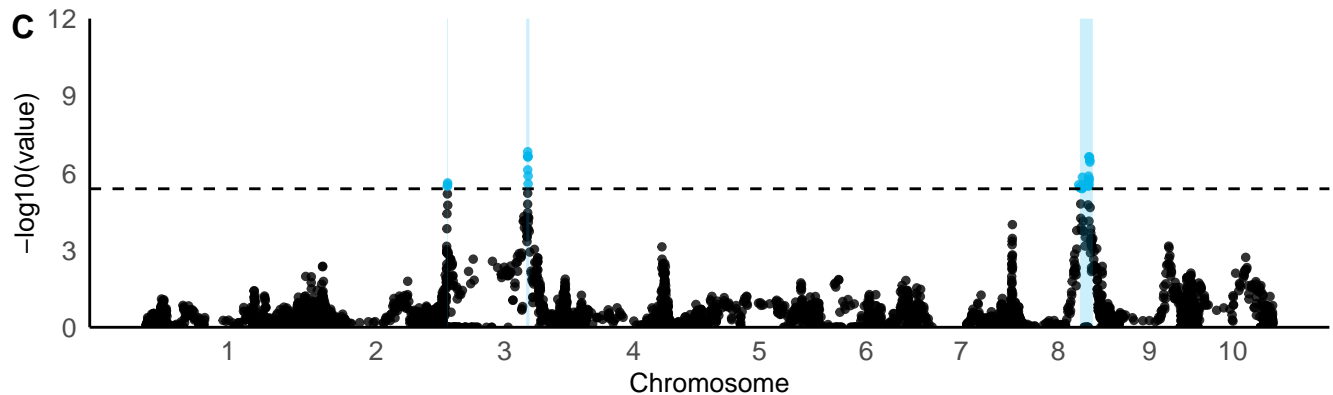

QTL H BLOIS\_2017\_OPT male\_flowering\_d6

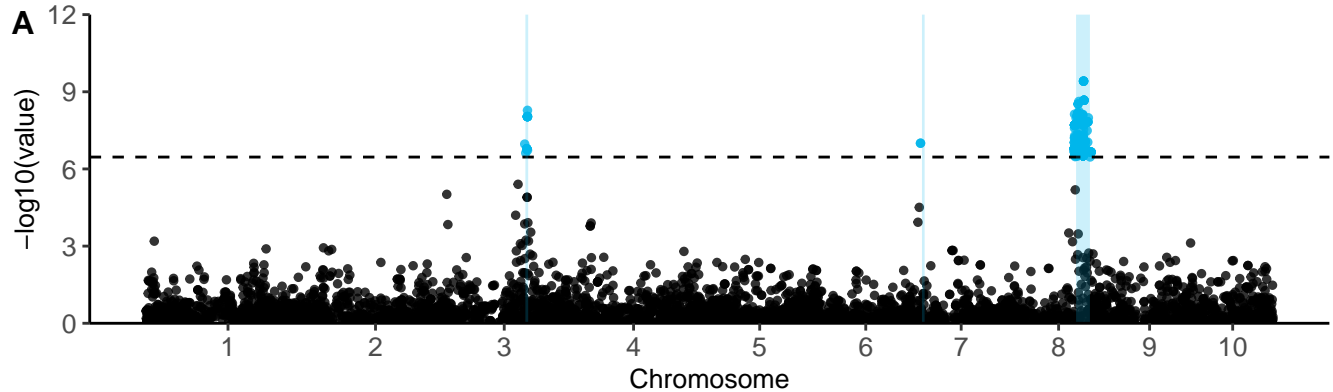

GWAS SNP GRANEROS\_2015\_OPT male\_flowering\_d6

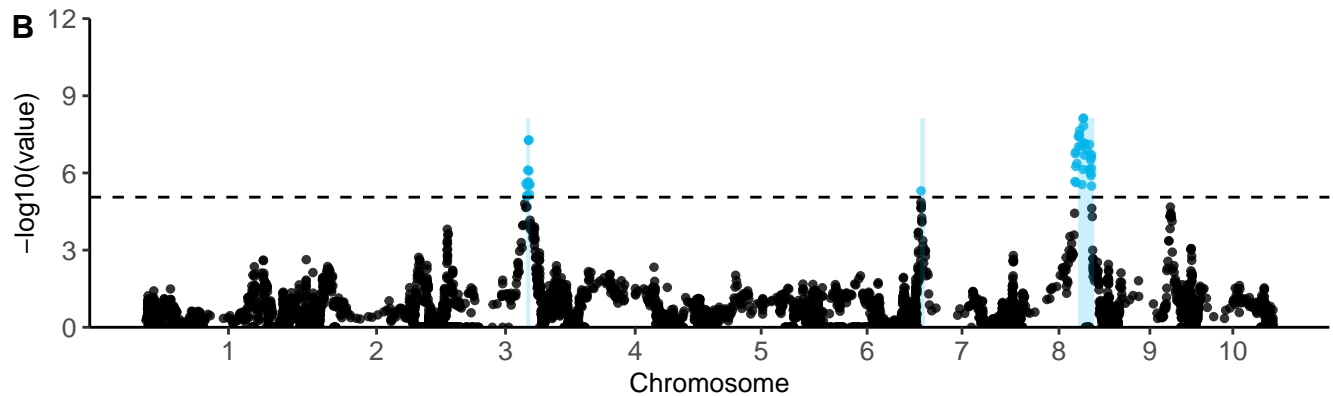

QTL F GRANEROS\_2015\_OPT male\_flowering\_d6

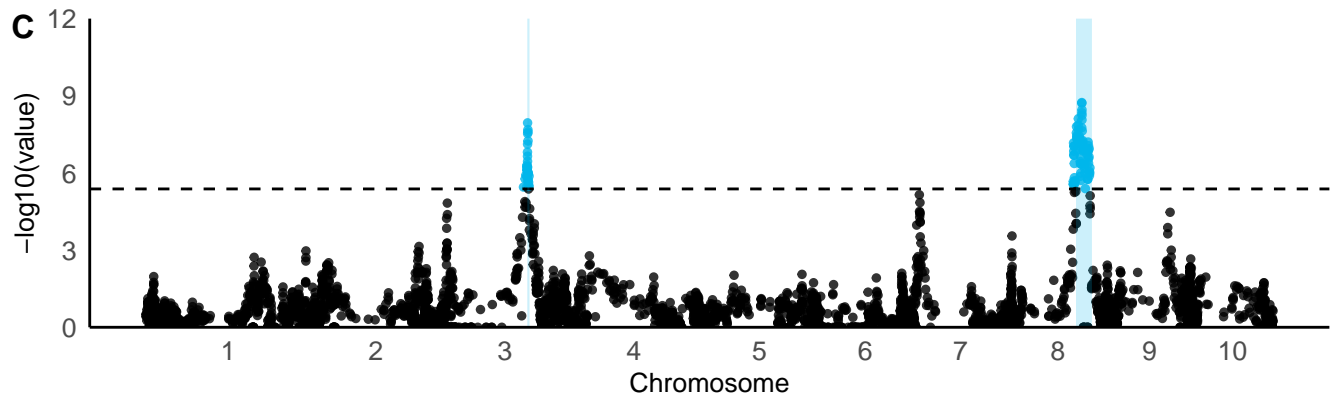

QTL H GRANEROS\_2015\_OPT male\_flowering\_d6

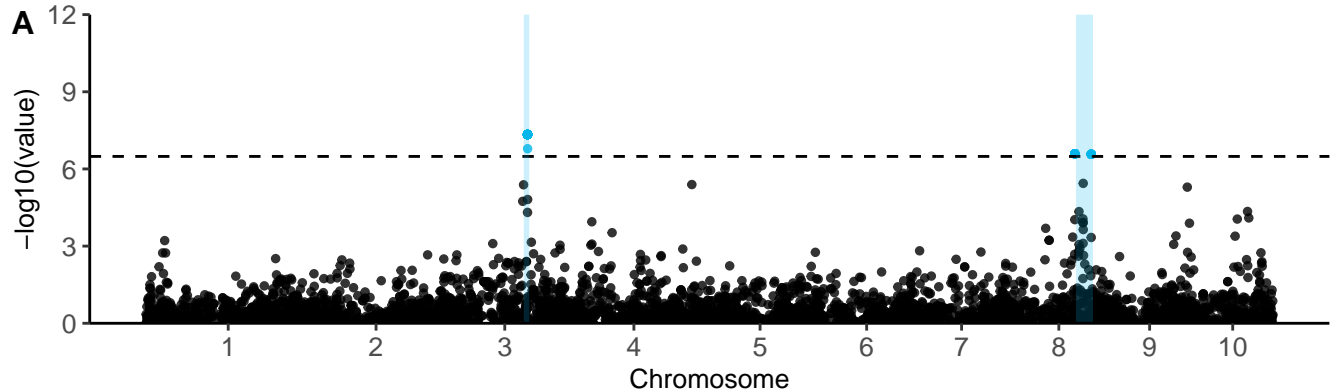

GWAS SNP NERAC\_2016\_WD male\_flowering\_d6

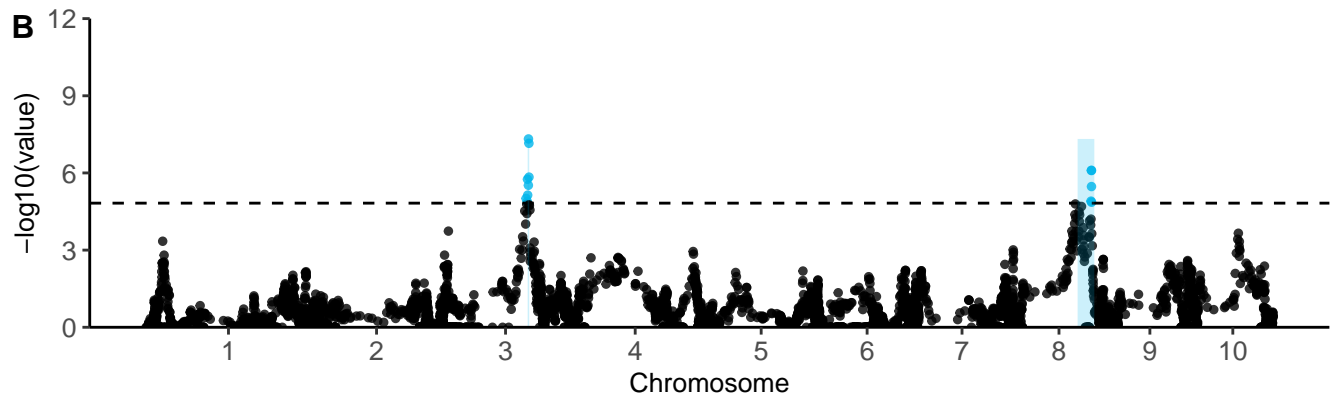

QTL F NERAC\_2016\_WD male\_flowering\_d6

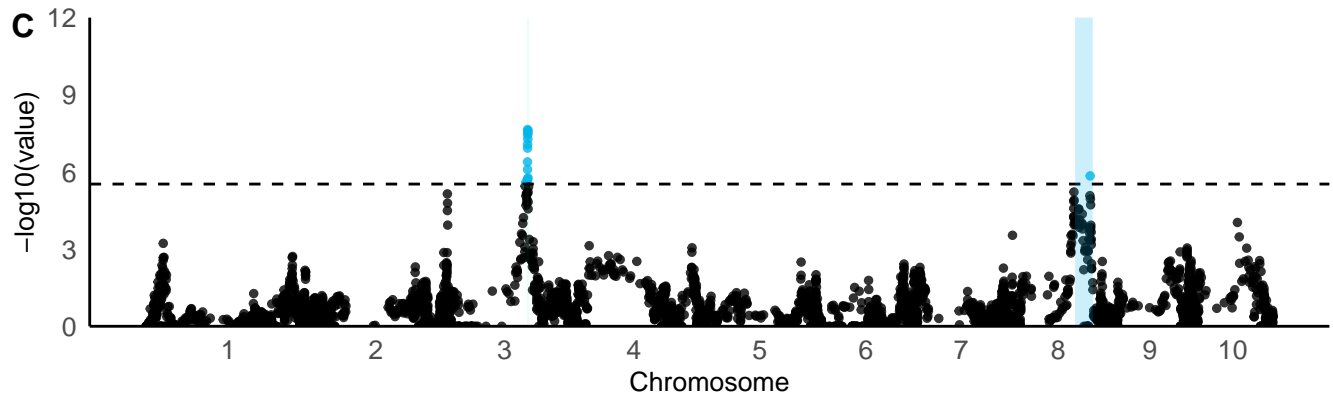

QTL H NERAC\_2016\_WD male\_flowering\_d6



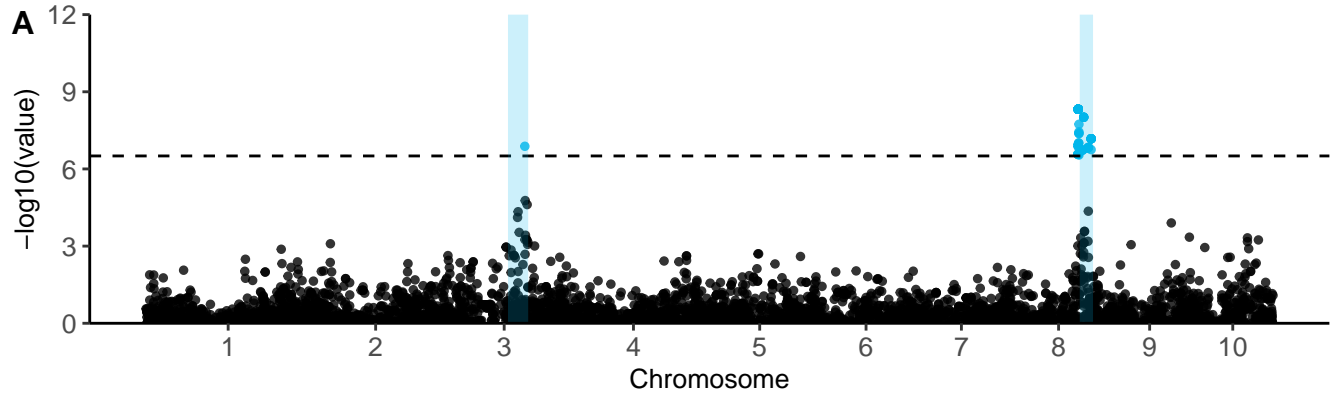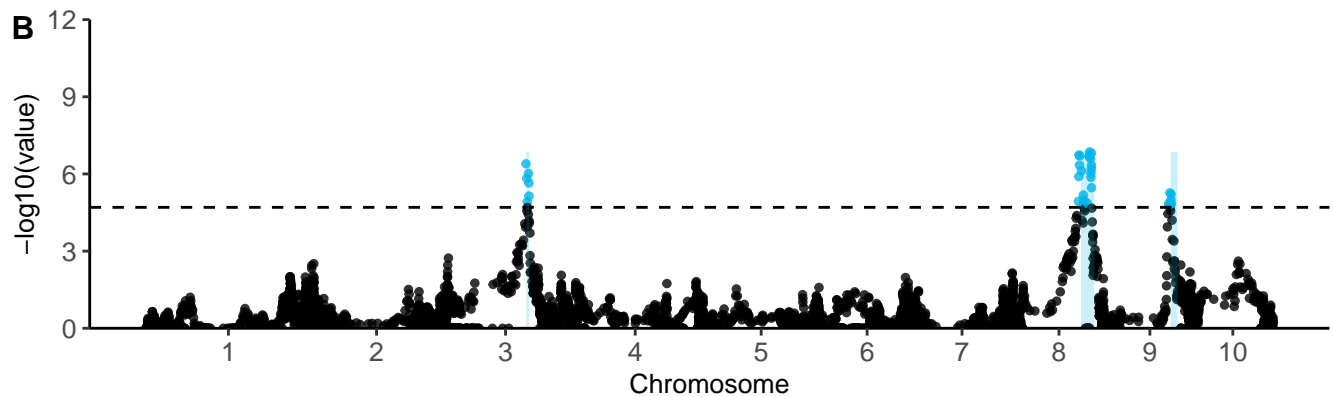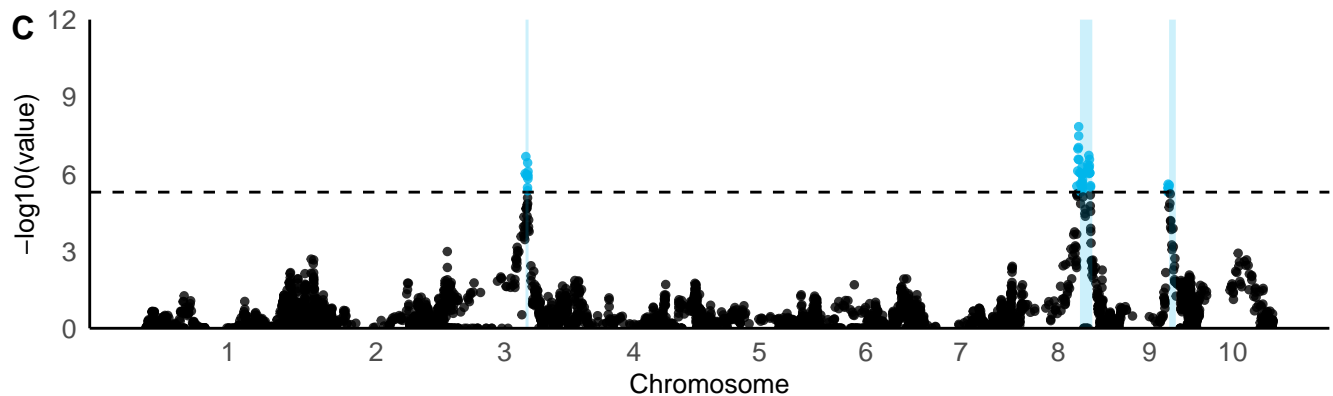

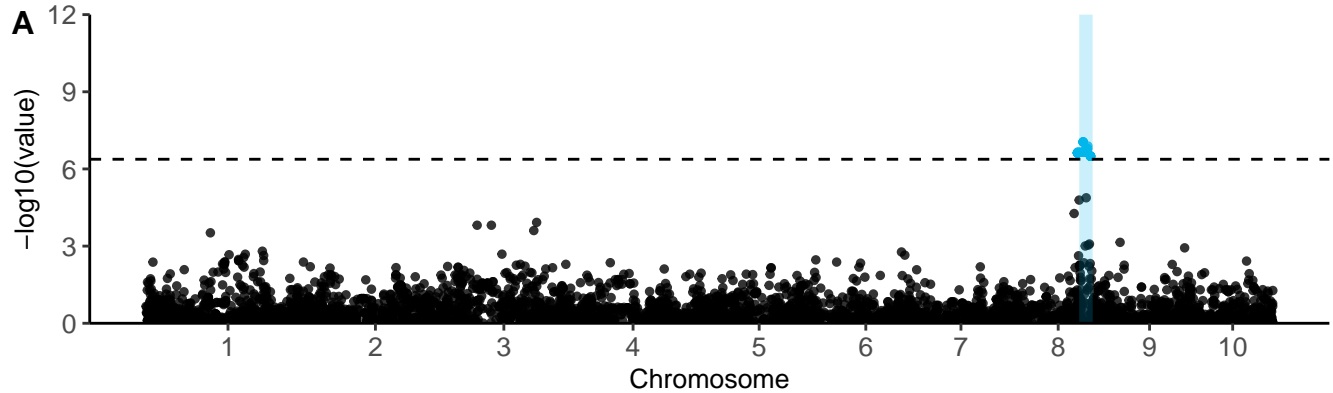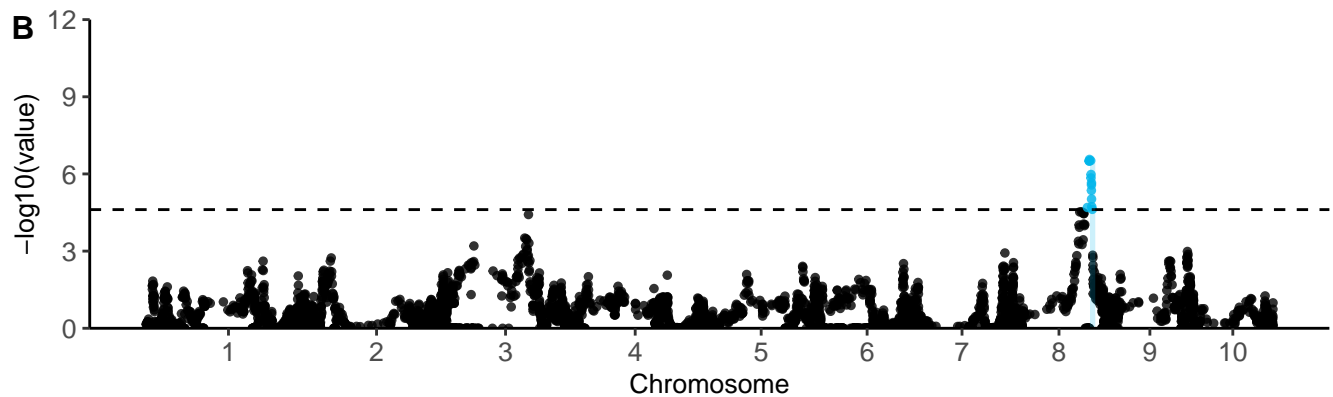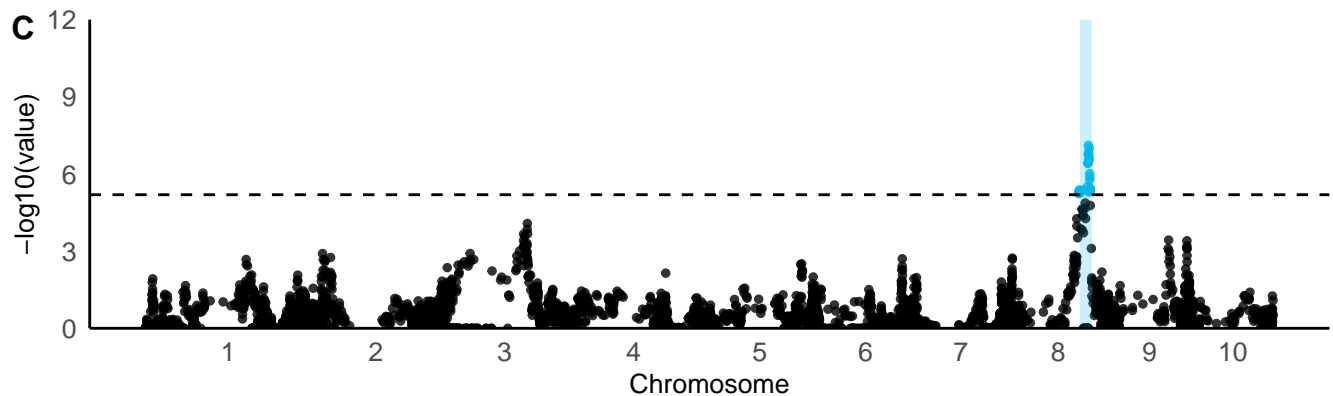

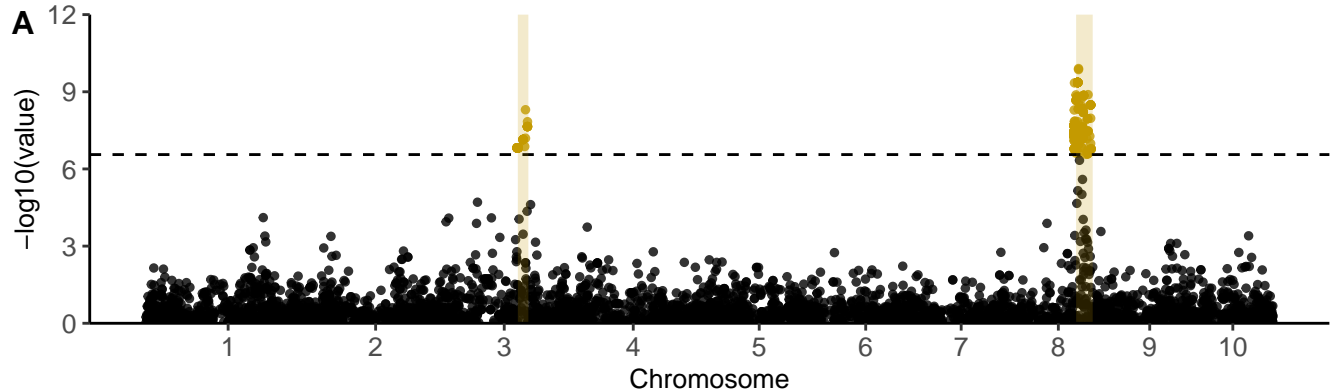

GWAS SNP ALL female\_flowering\_d6

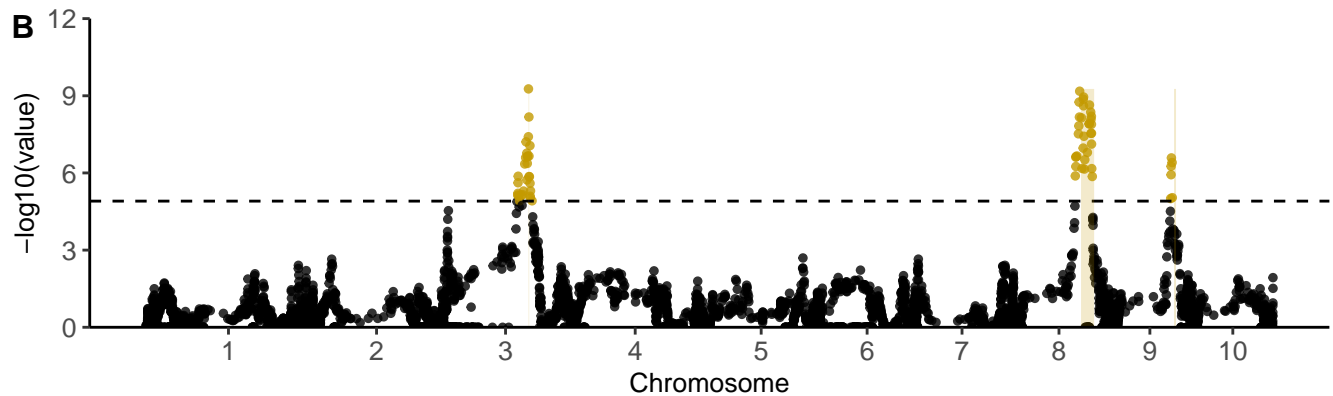

QTL F ALL female\_flowering\_d6

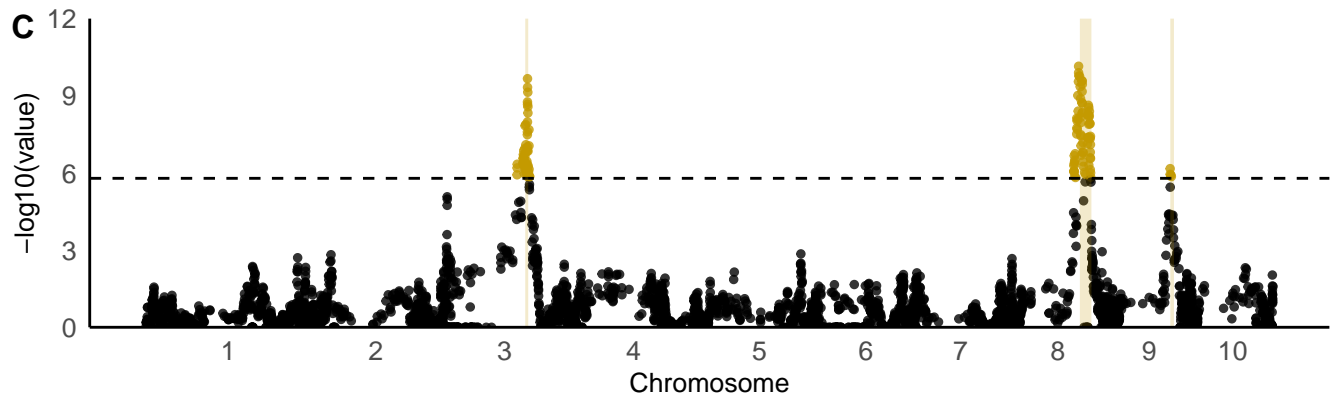

QTL H ALL female\_flowering\_d6

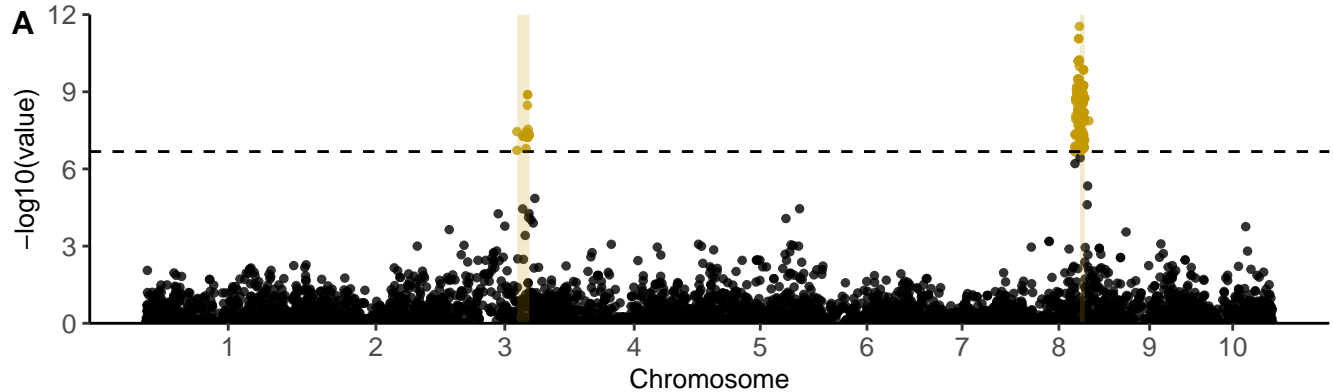

GWAS SNP BLOIS\_2014\_OPT female\_flowering\_d6

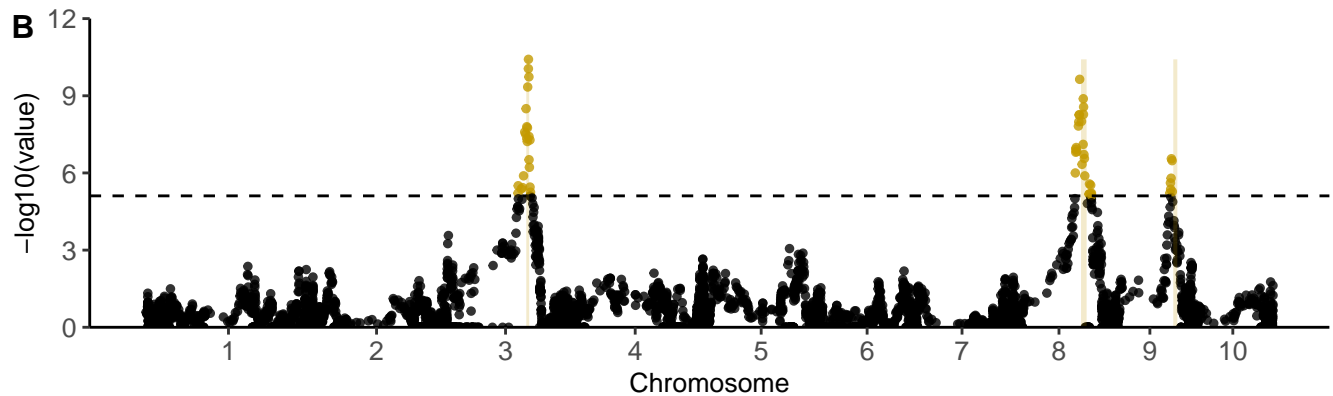

QTL F BLOIS\_2014\_OPT female\_flowering\_d6

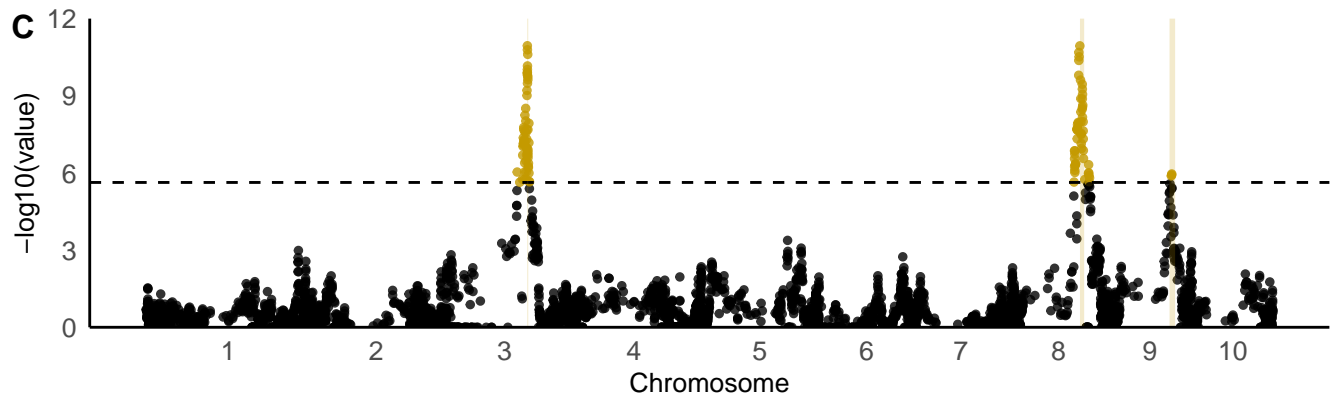

QTL H BLOIS\_2014\_OPT female\_flowering\_d6

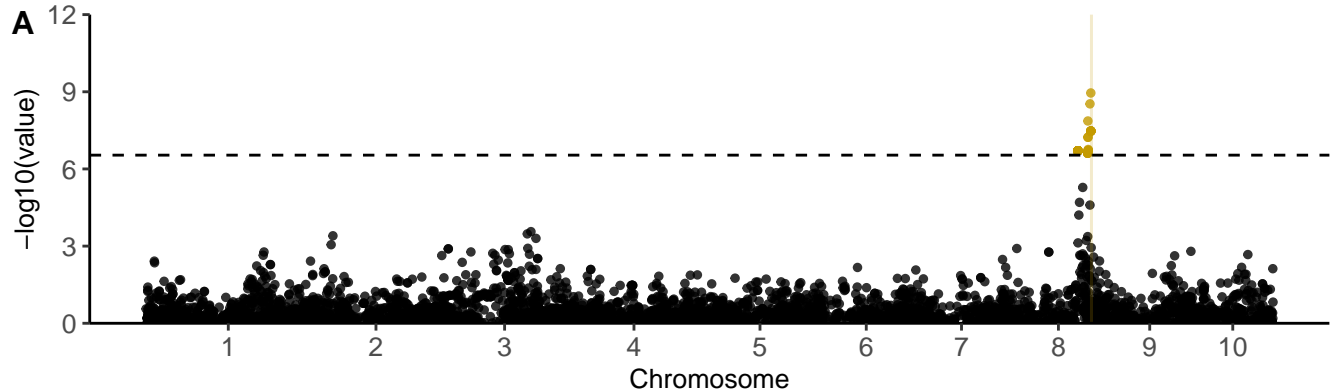

GWAS SNP BLOIS\_2017\_OPT female\_flowering\_d6

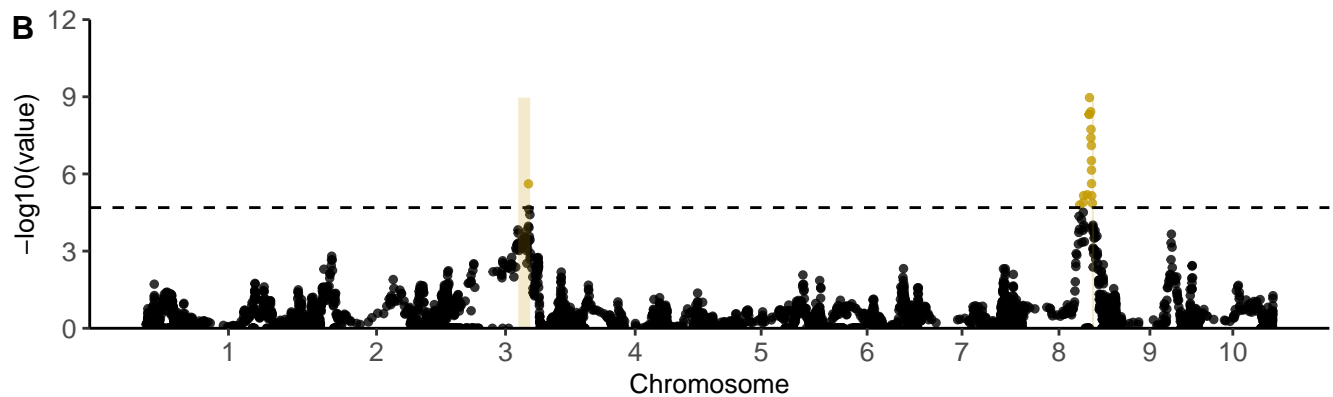

QTL F BLOIS\_2017\_OPT female\_flowering\_d6

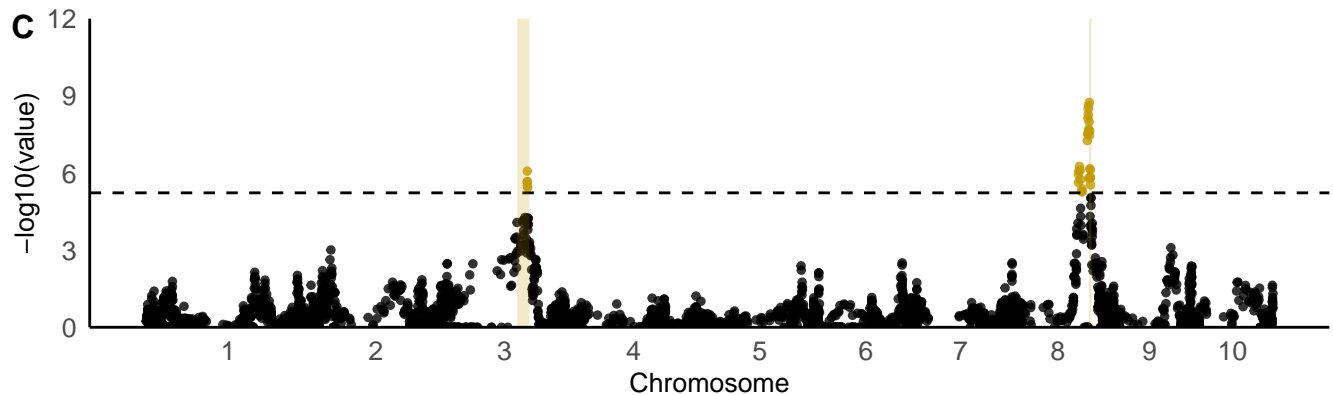

QTL H BLOIS\_2017\_OPT female\_flowering\_d6

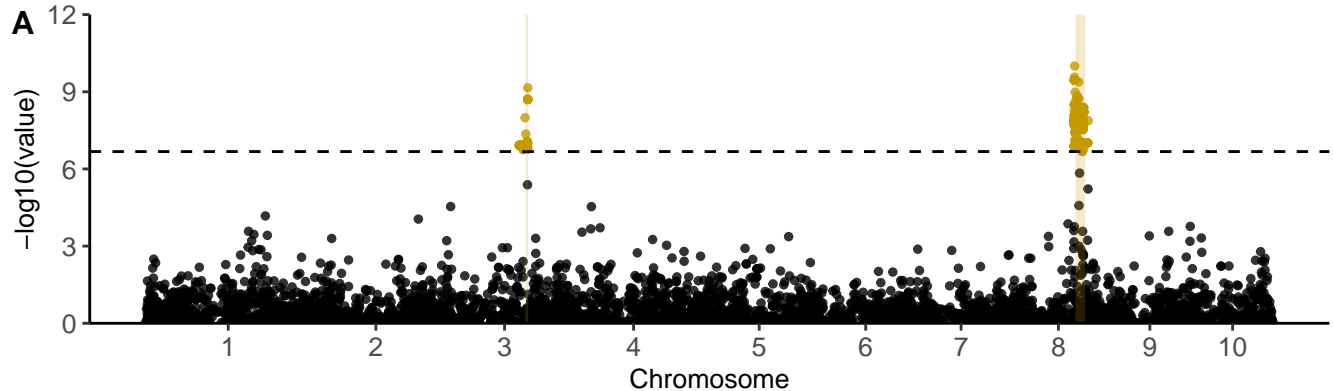

GWAS SNP GRANEROS\_2015\_OPT female\_flowering\_d6

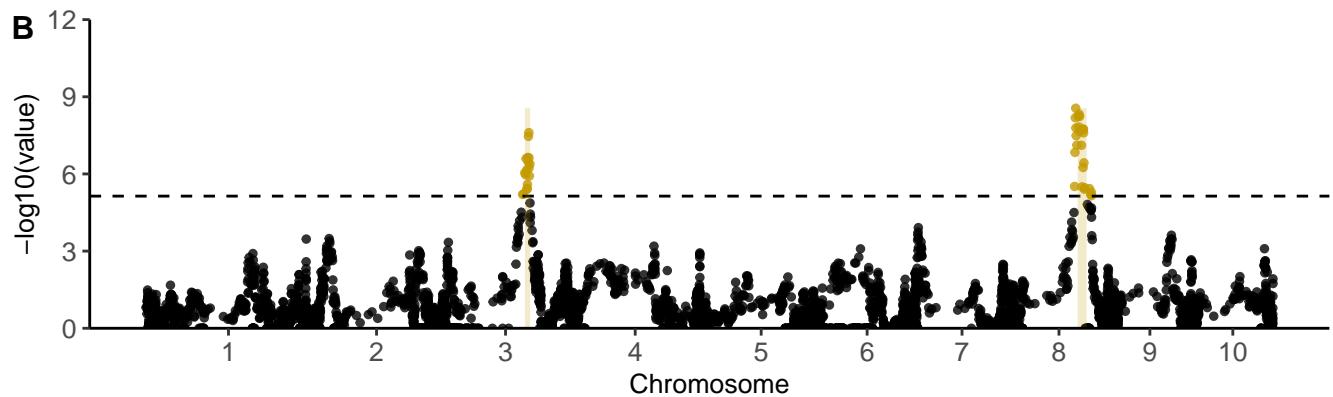

QTL F GRANEROS\_2015\_OPT female\_flowering\_d6

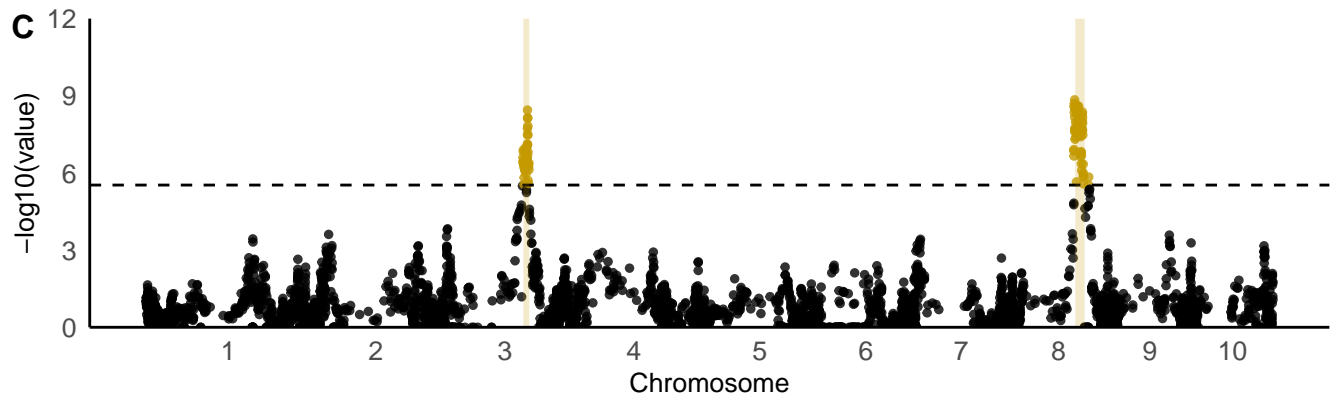

QTL H GRANEROS\_2015\_OPT female\_flowering\_d6

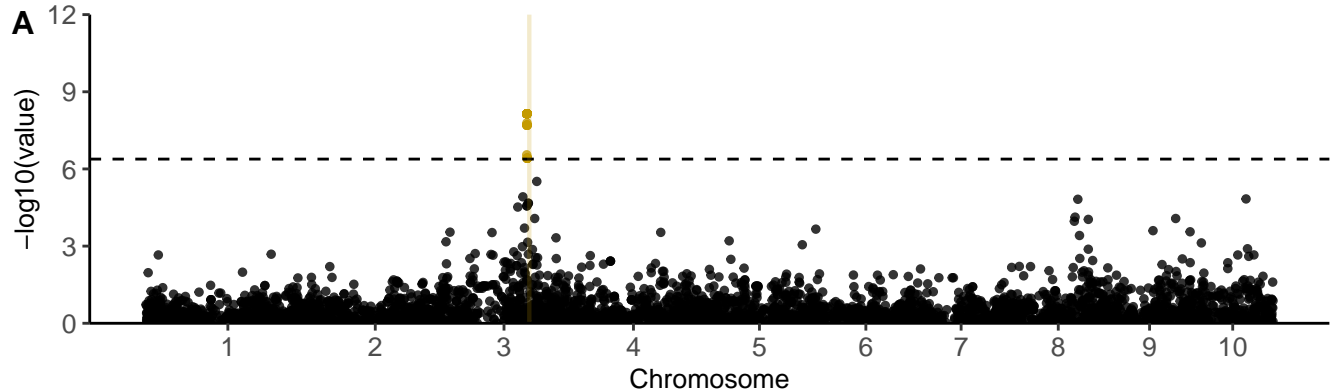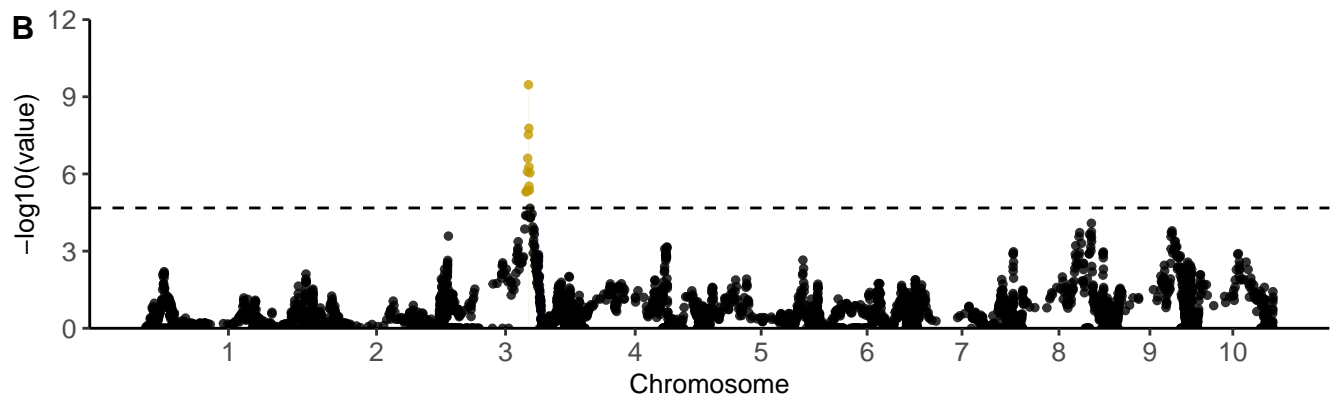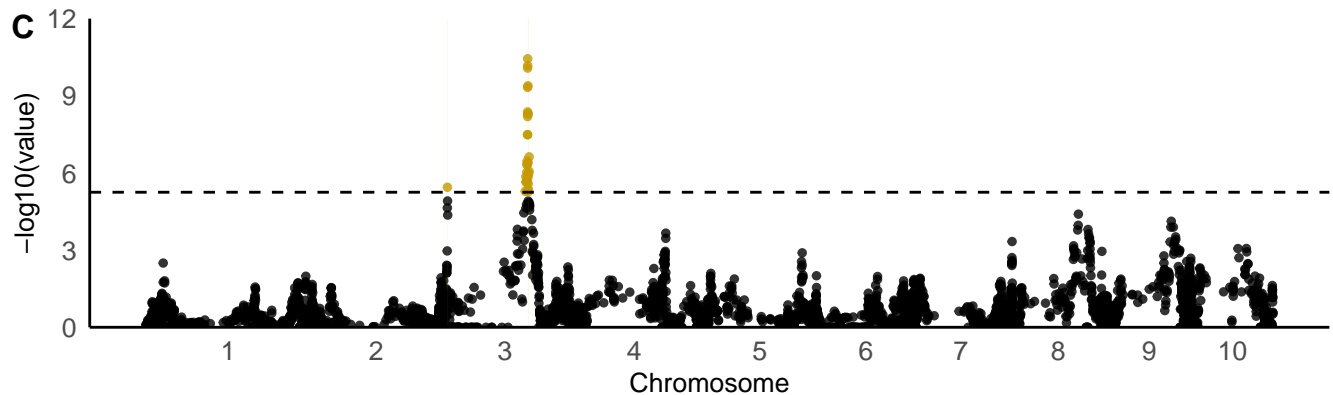

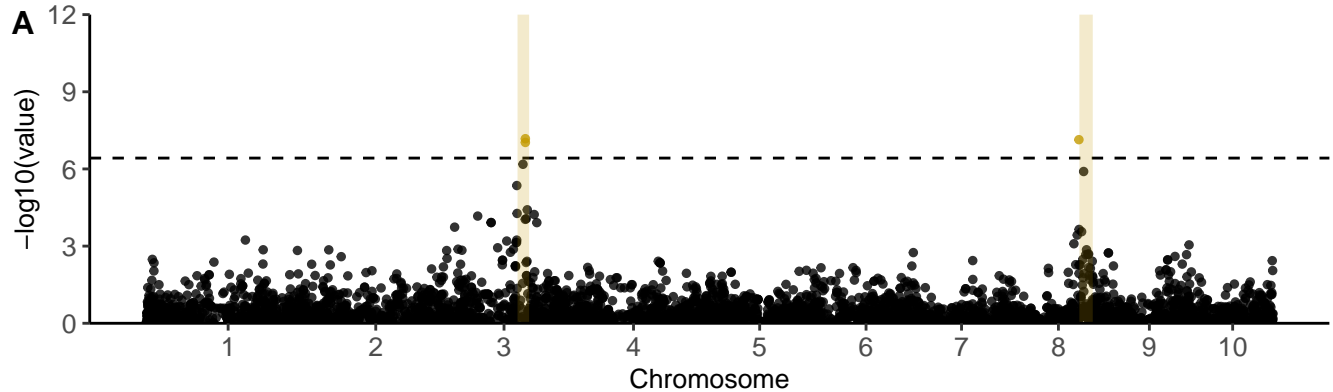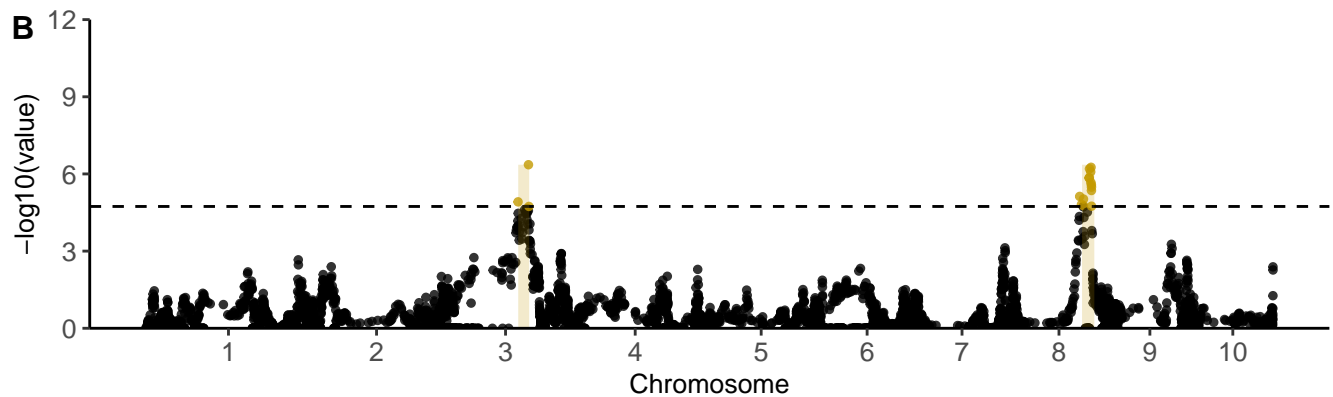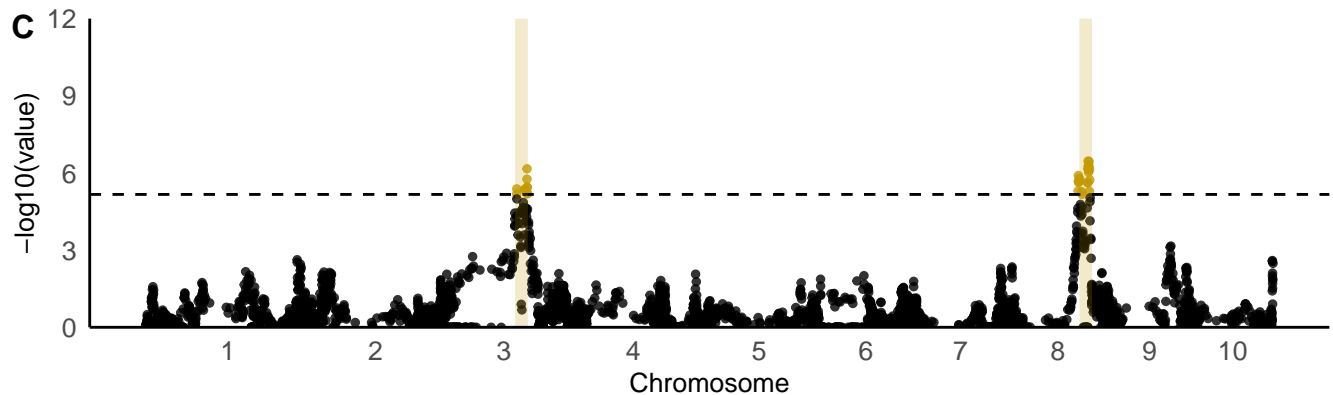



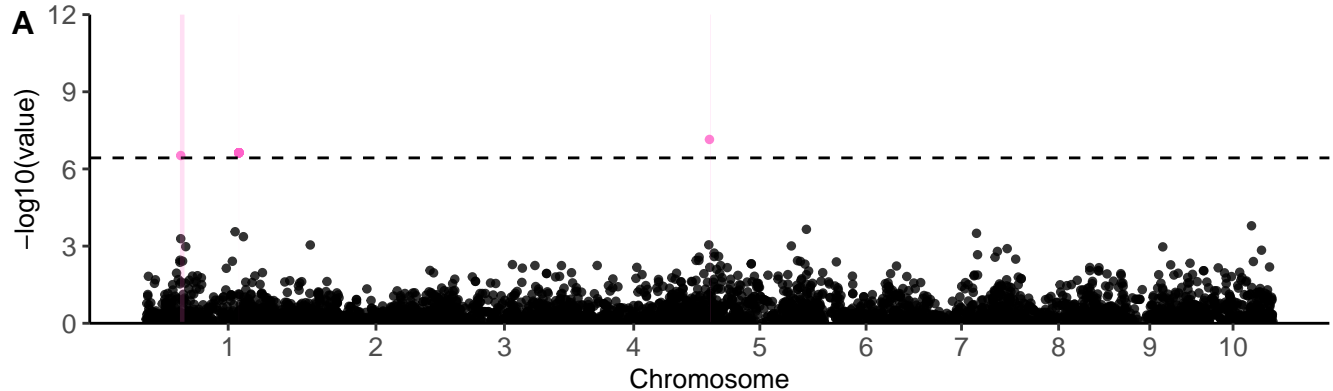

GWAS SNP STPAUL\_2017\_WD grain\_yield\_15

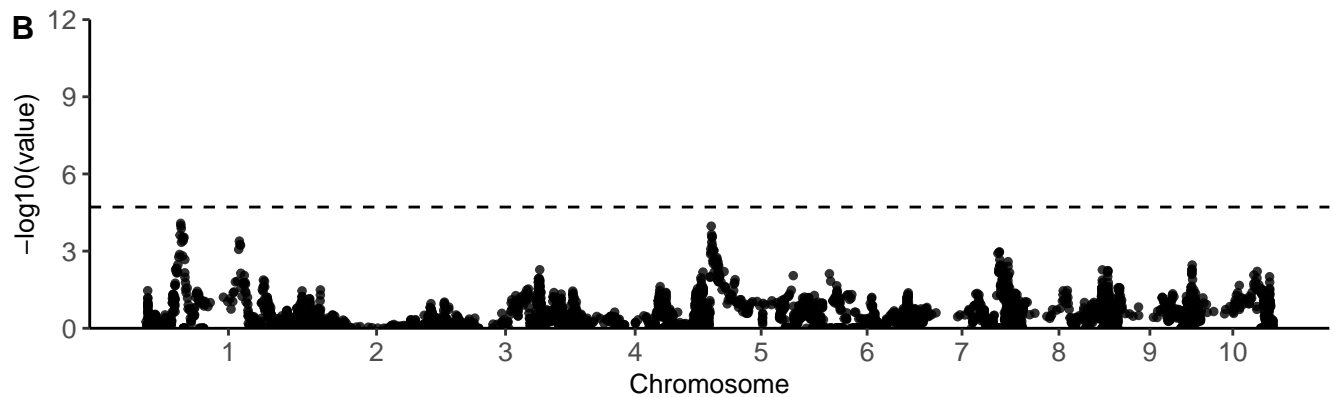

QTL F STPAUL\_2017\_WD grain\_yield\_15

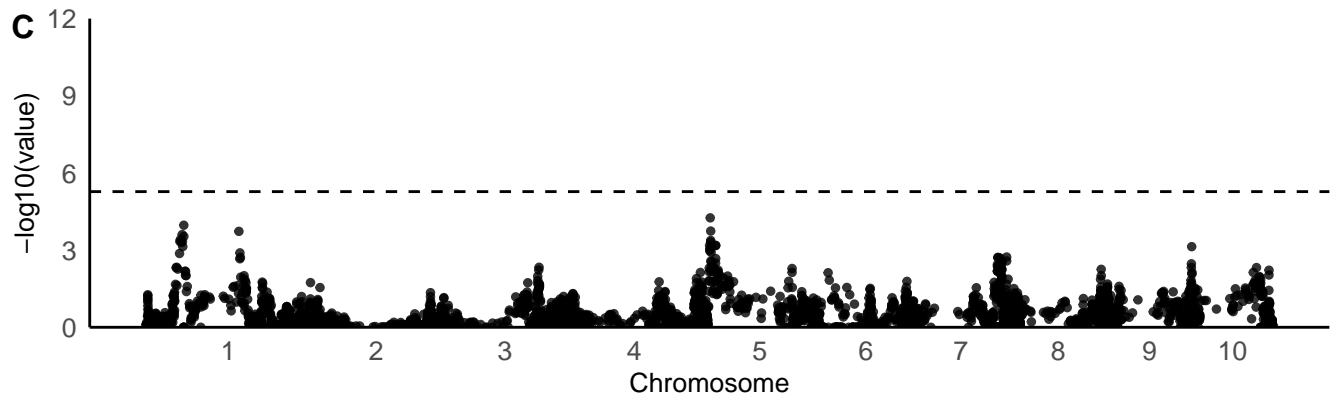

QTL H STPAUL\_2017\_WD grain\_yield\_15

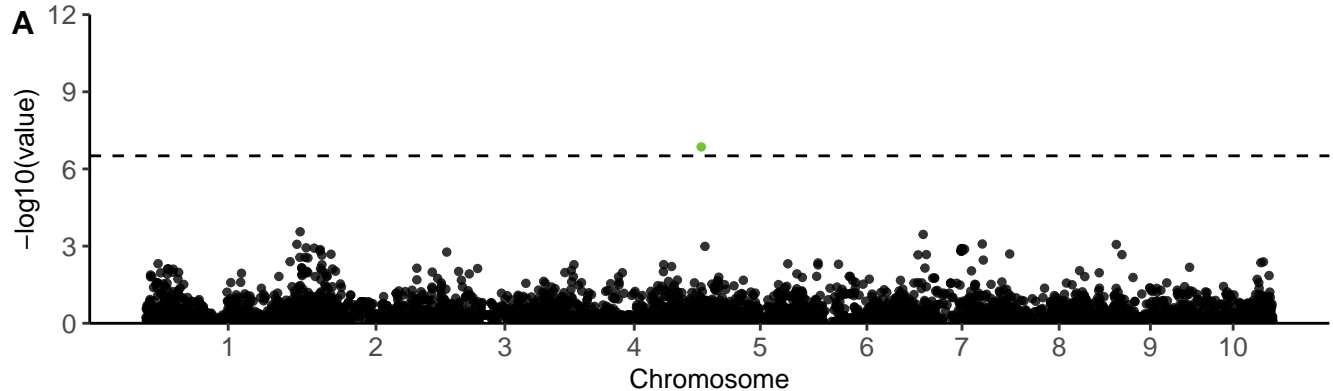

GWAS SNP ALL tkw\_15

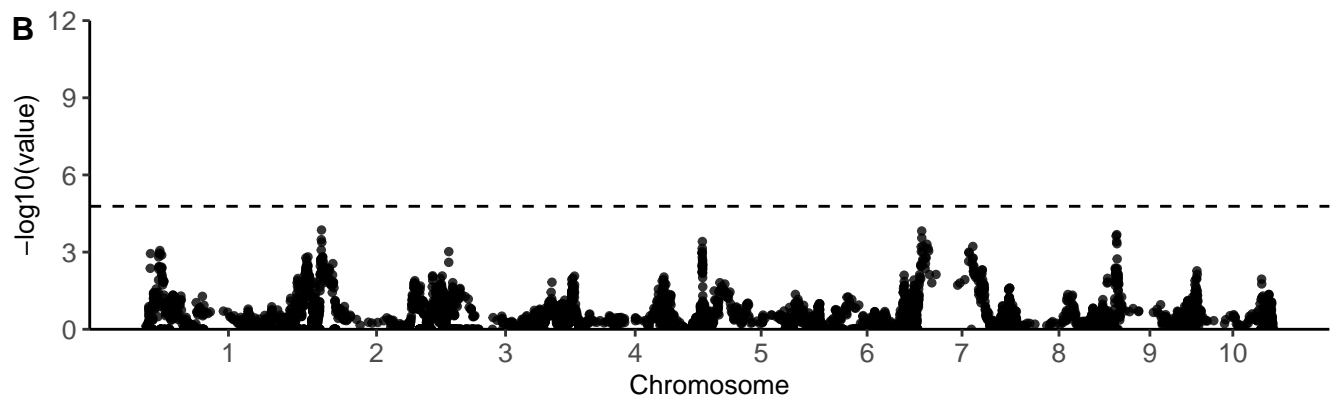

QTL F ALL tkw\_15

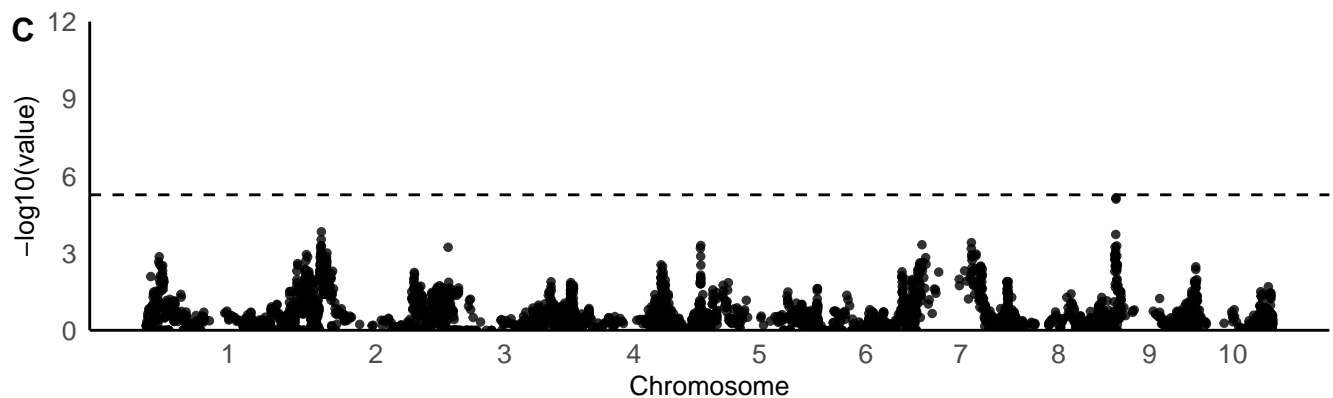

QTL H ALL tkw\_15

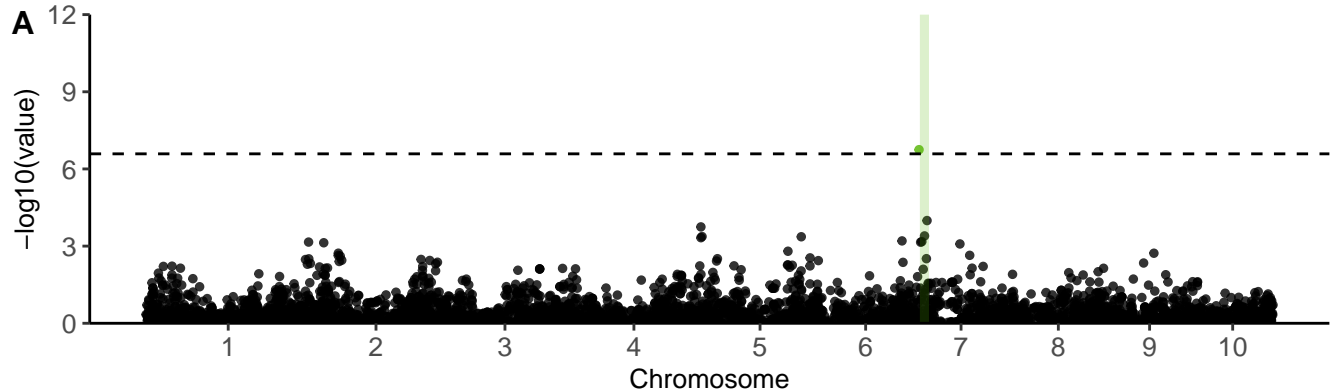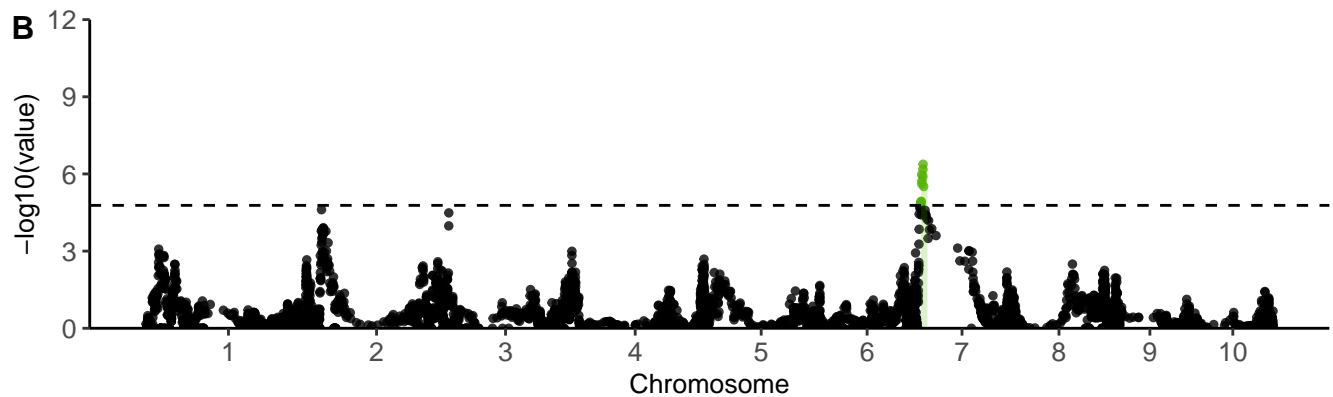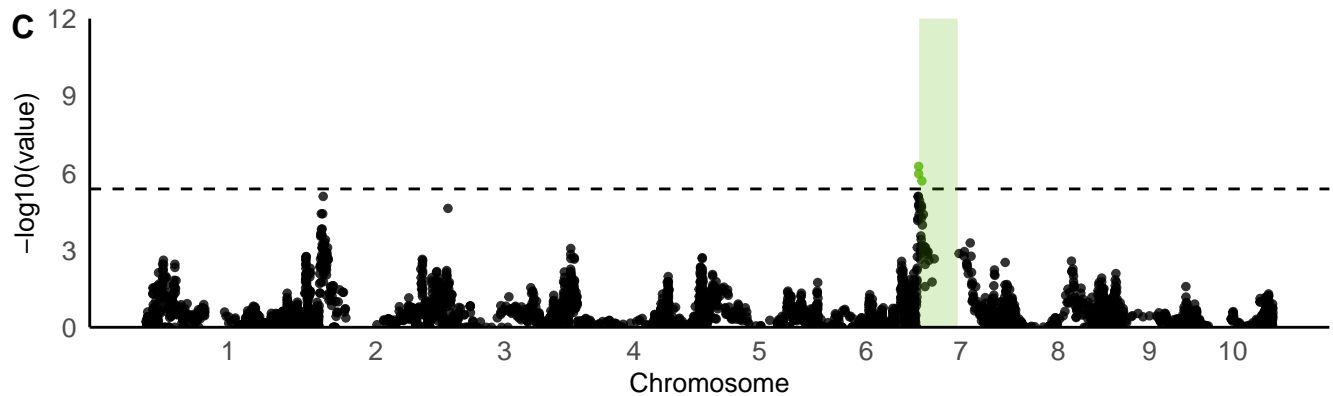

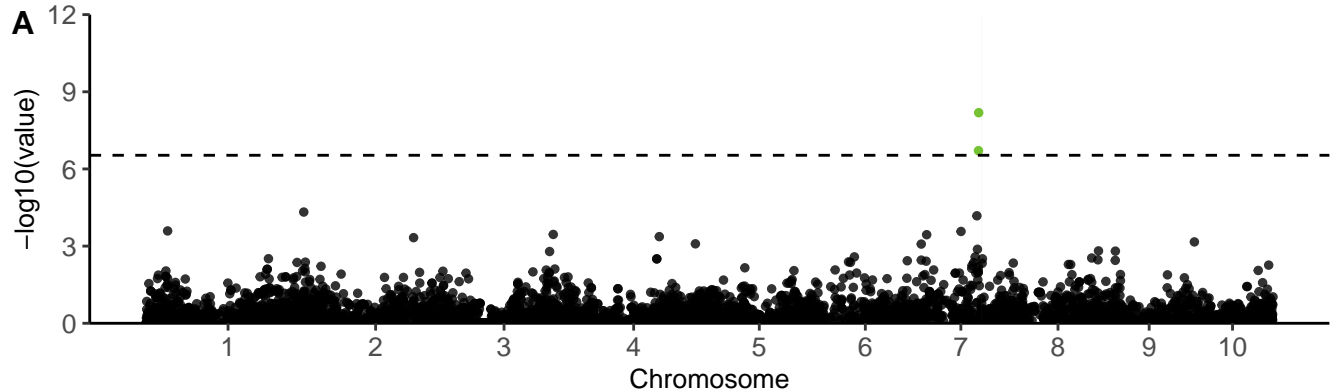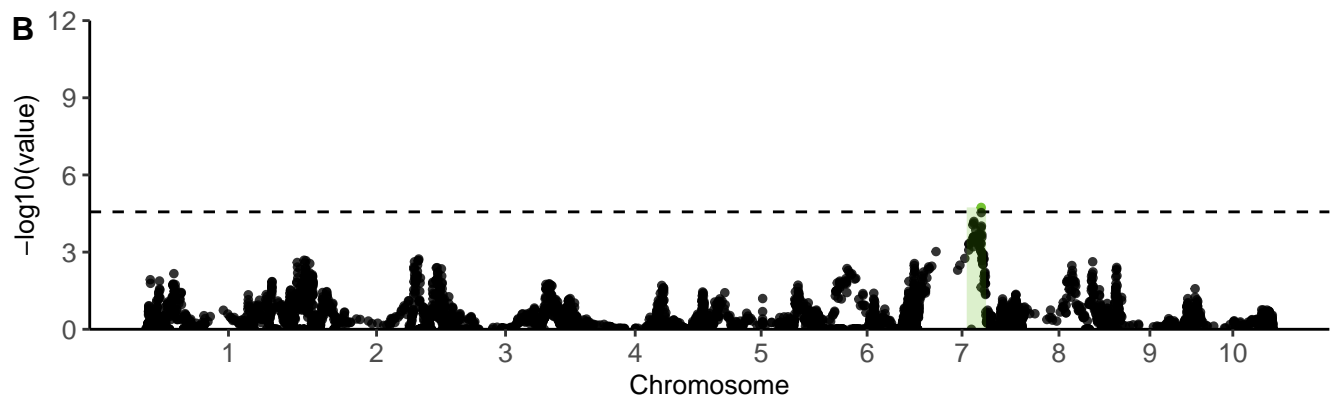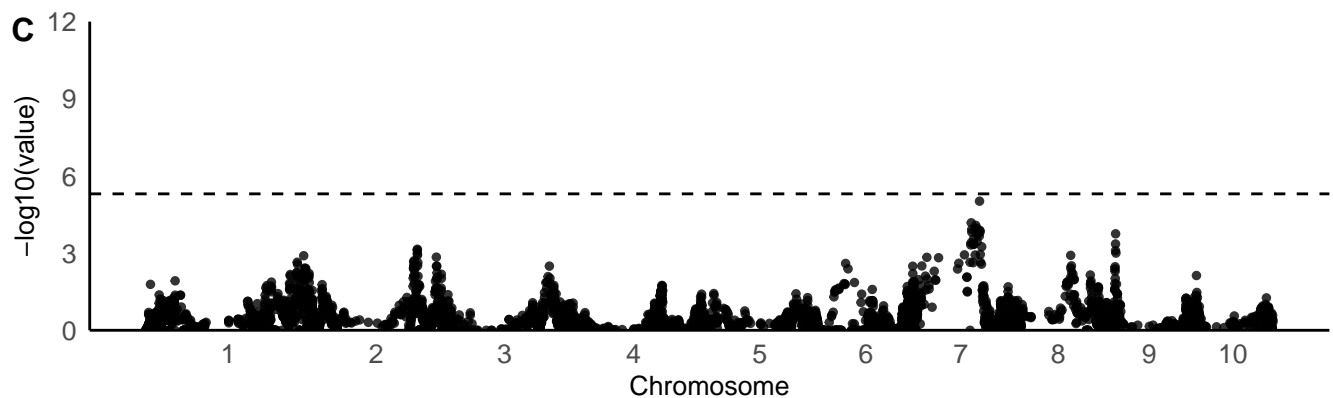

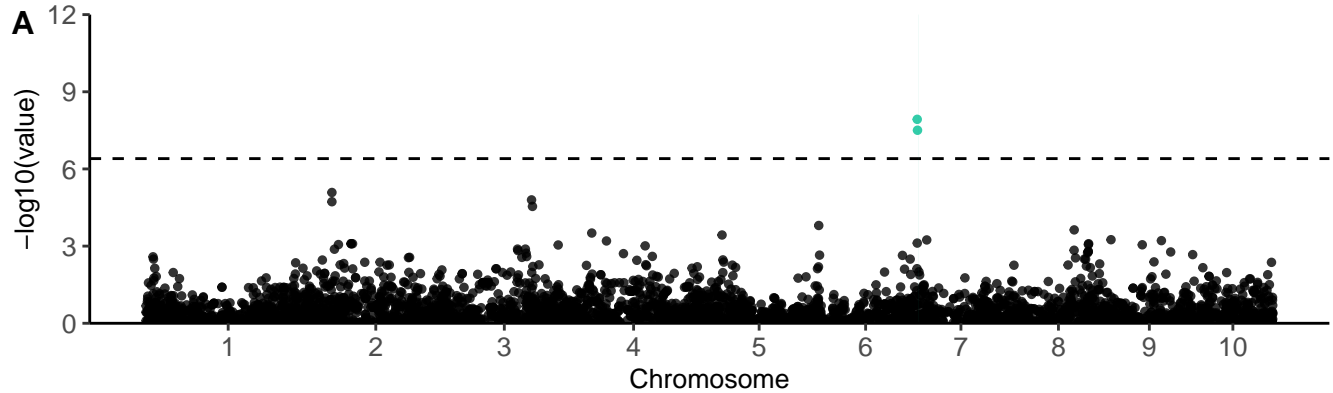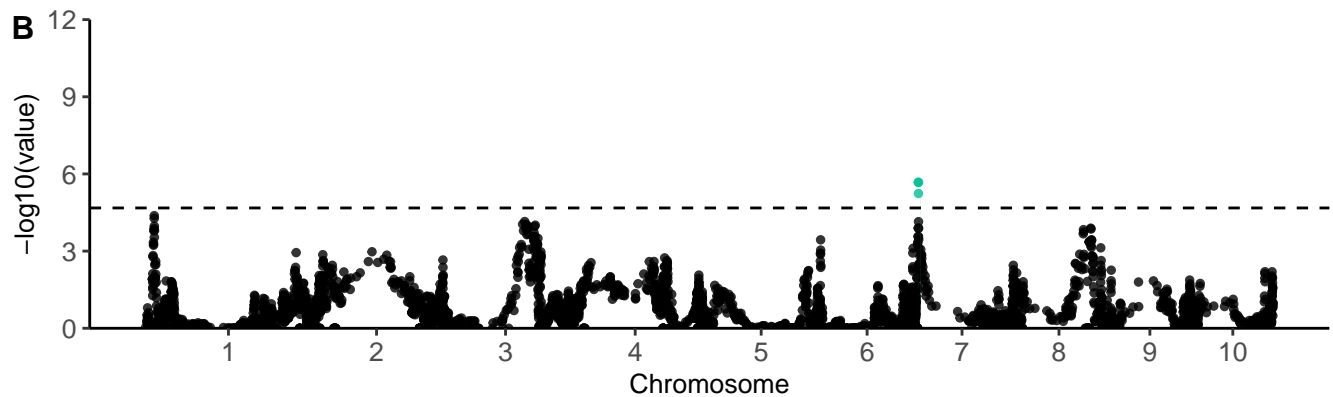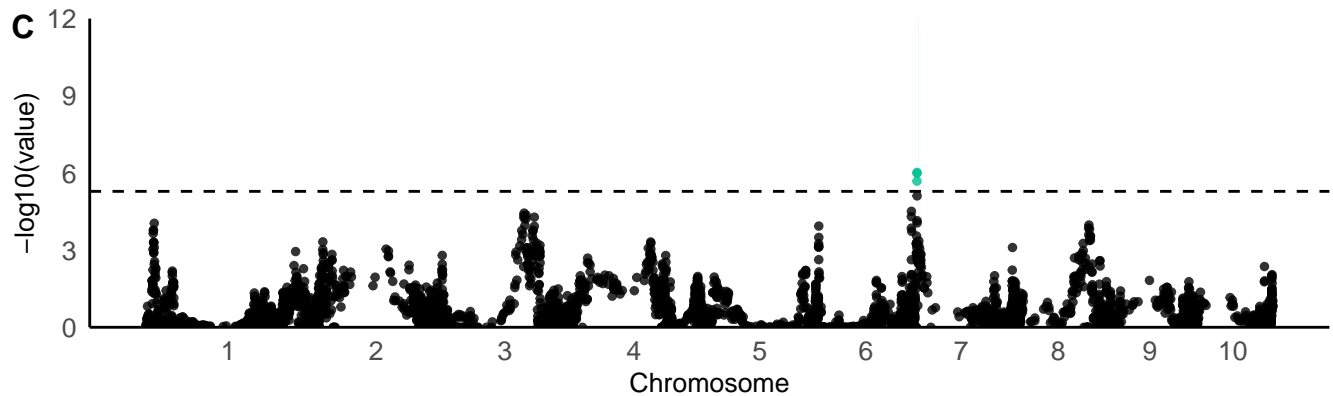

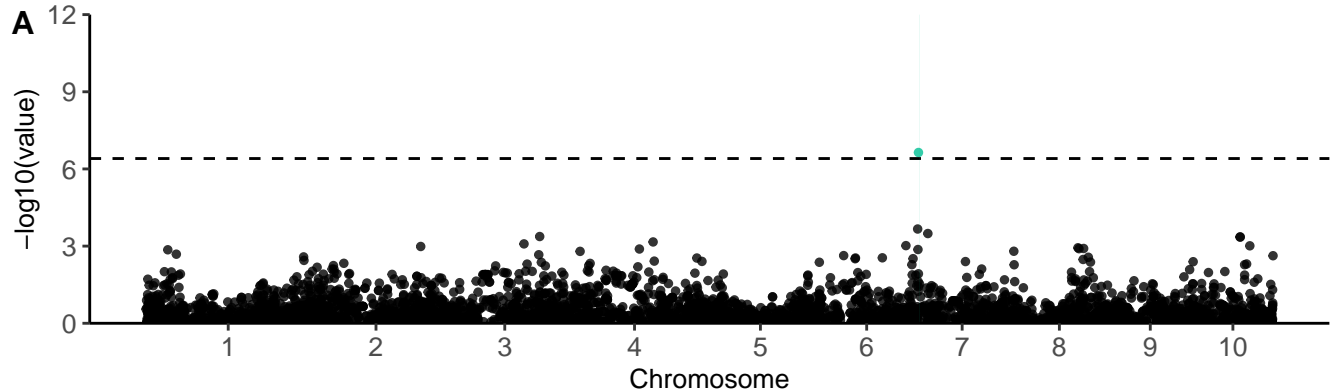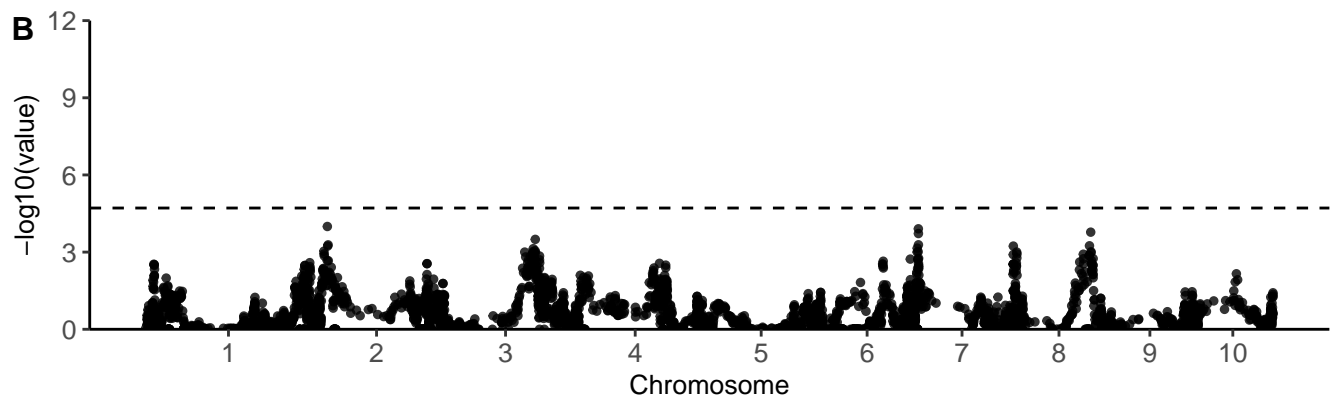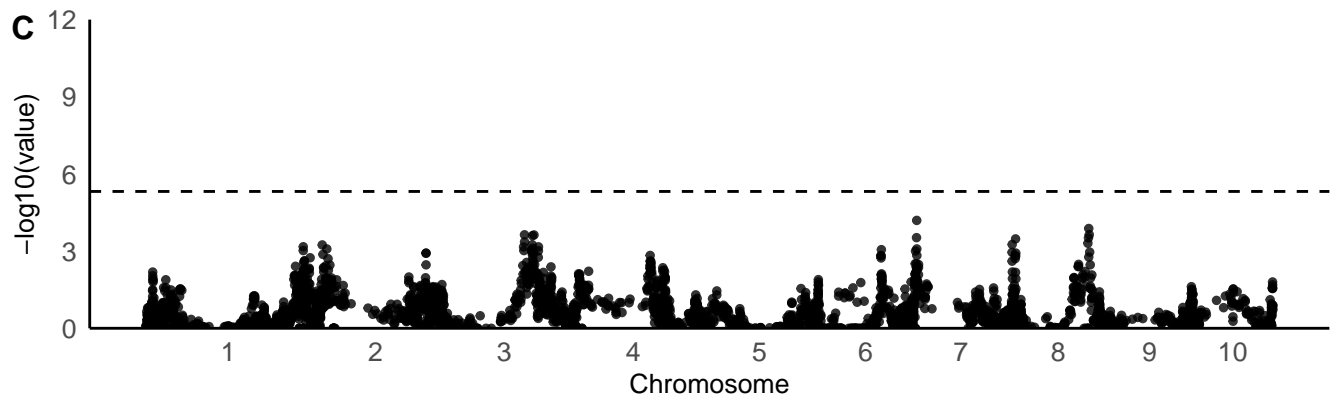

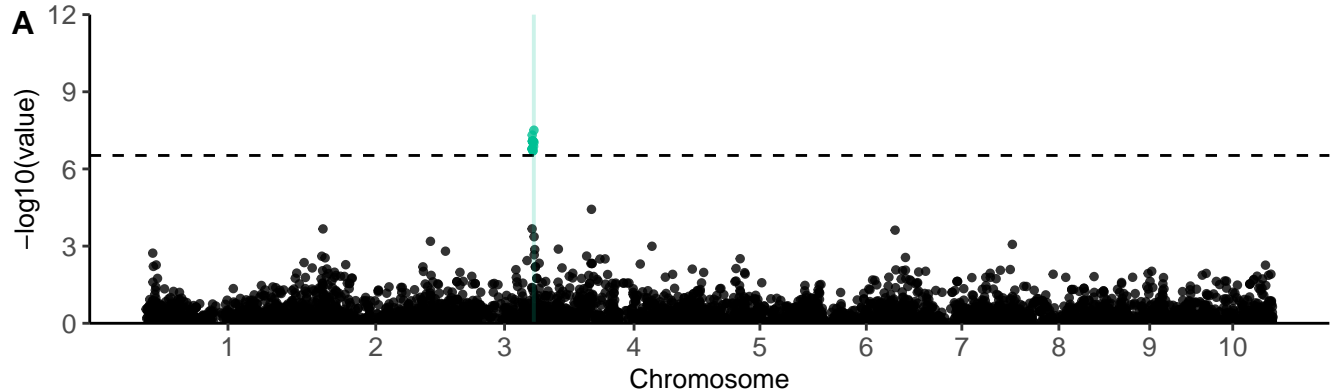

GWAS SNP NERAC\_2016\_WD total\_plant\_height

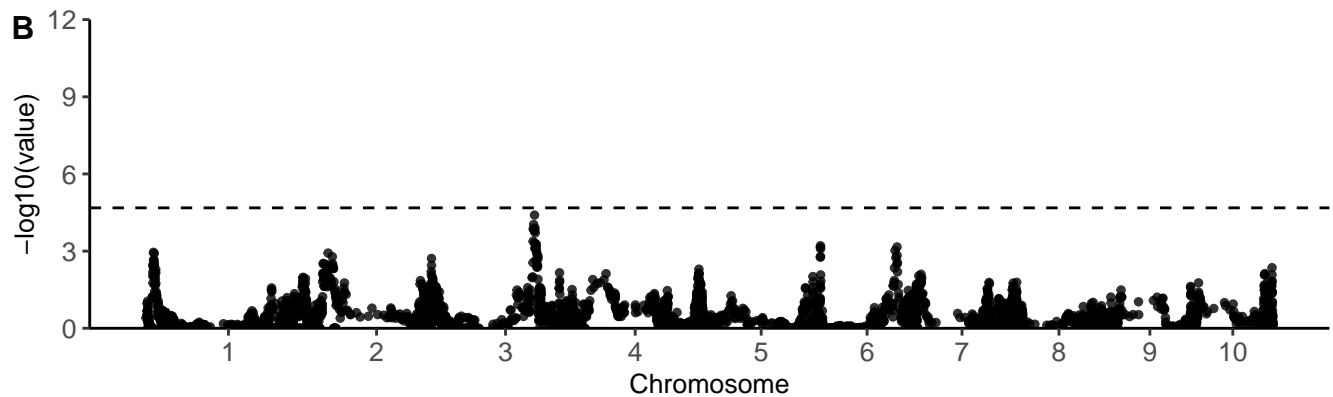

QTL F NERAC\_2016\_WD total\_plant\_height

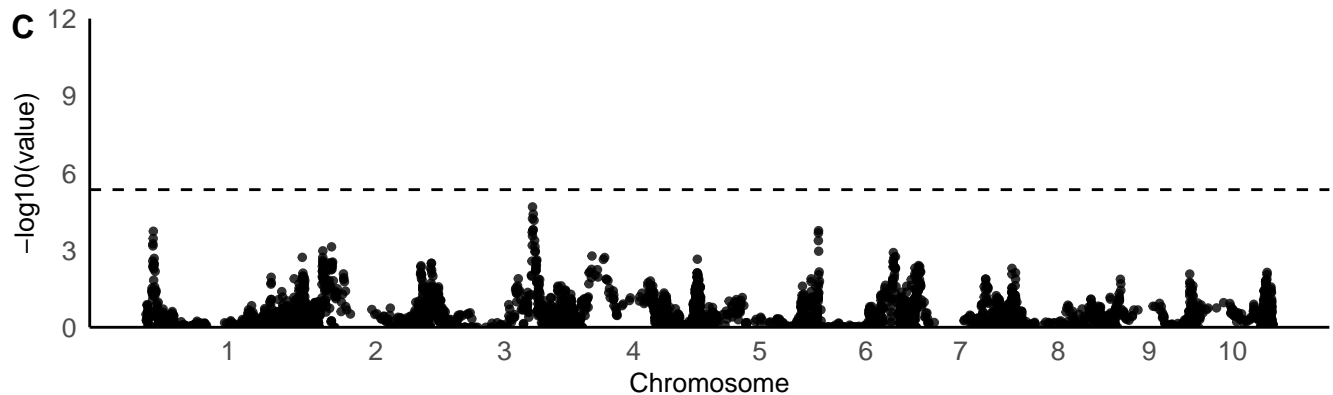

QTL H NERAC\_2016\_WD total\_plant\_height

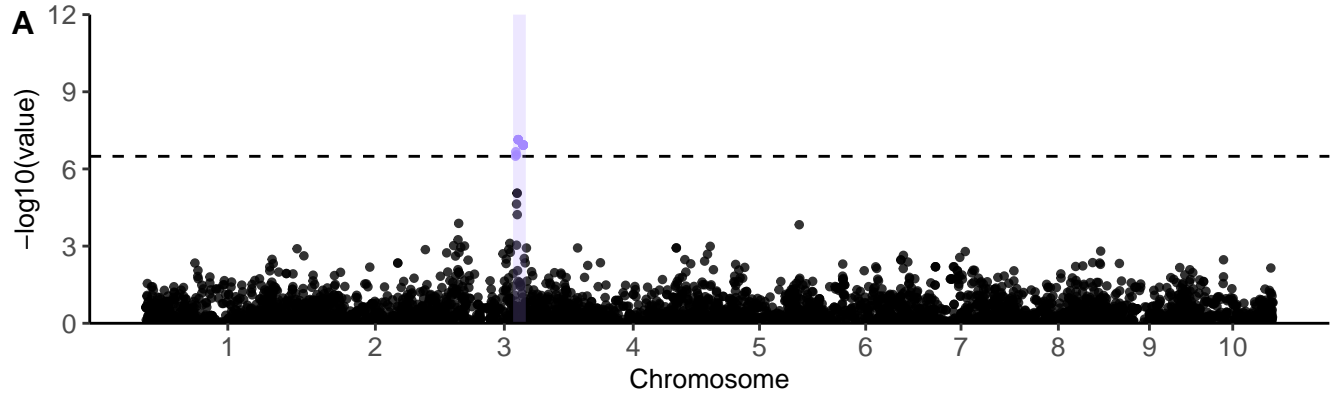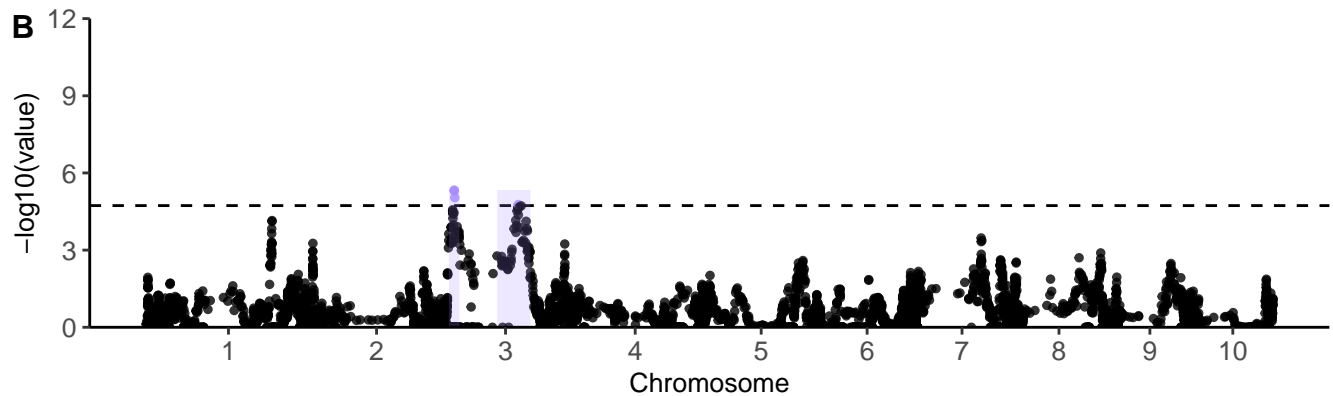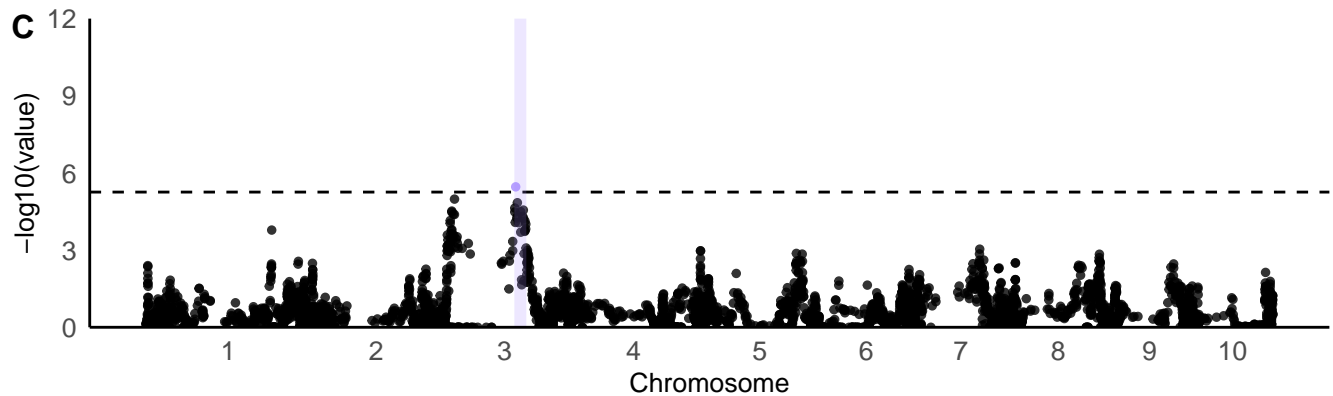



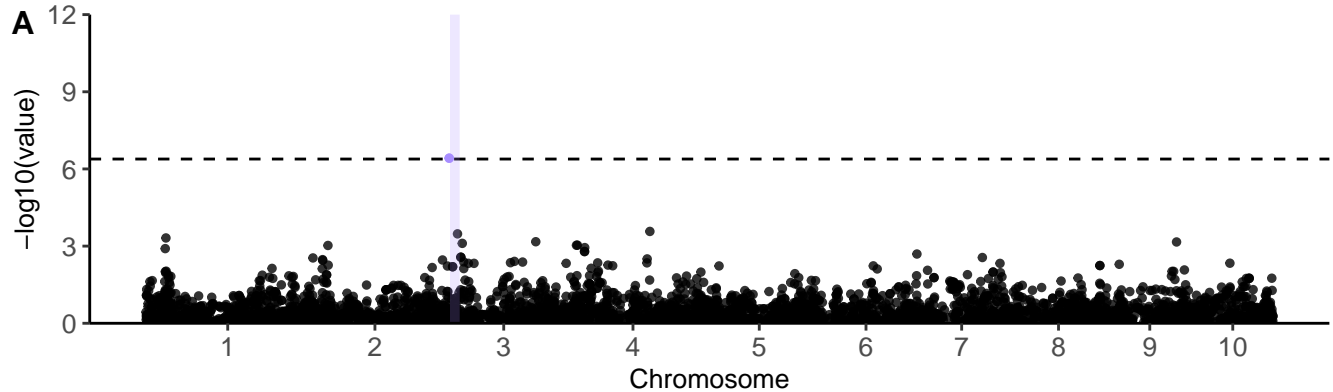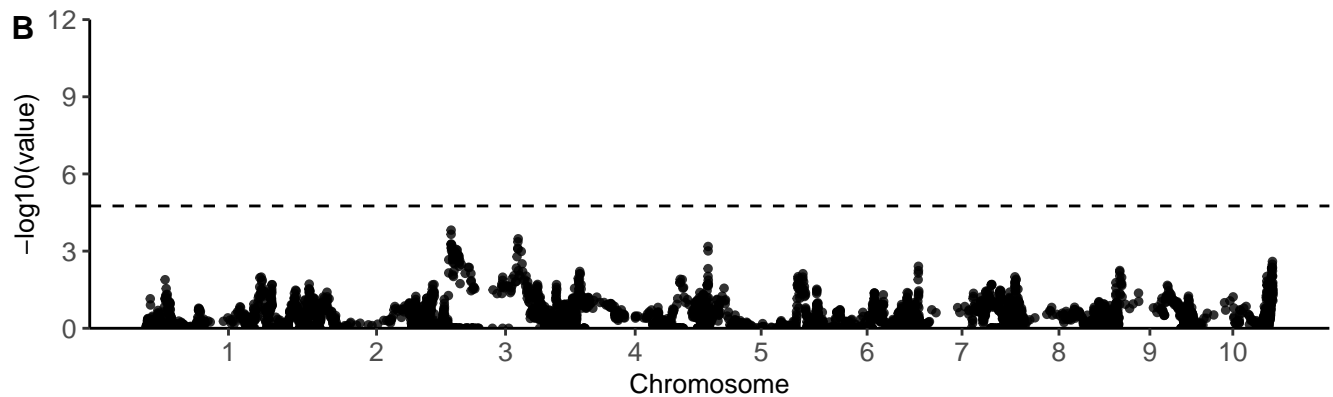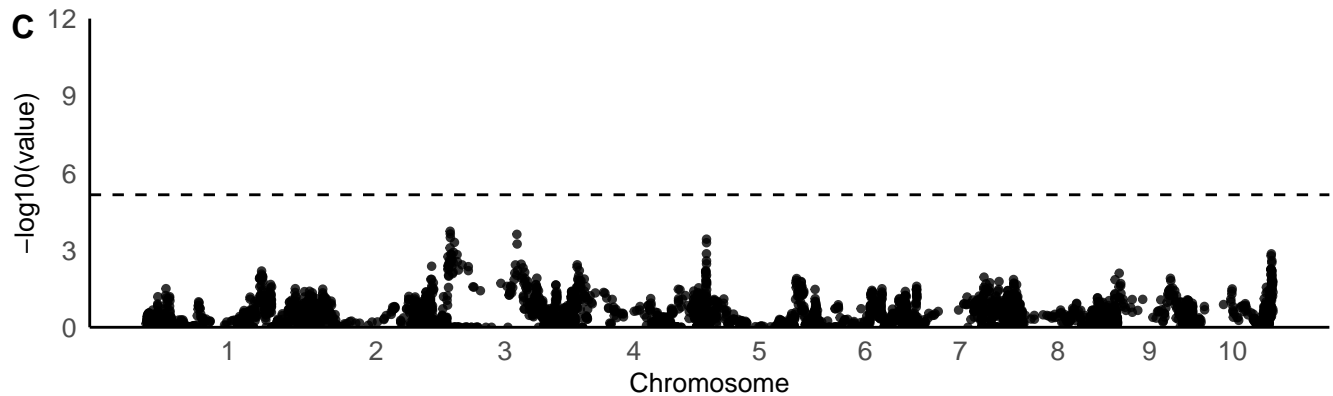

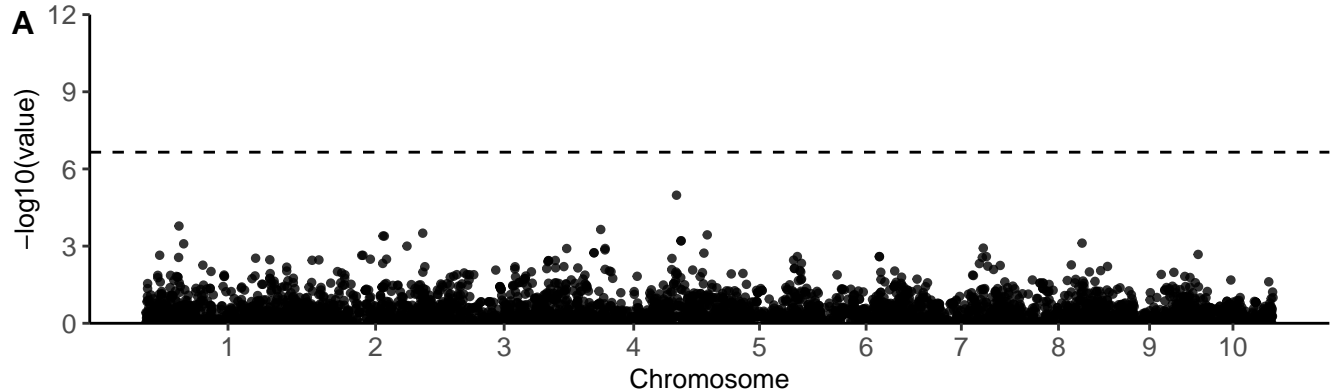

GWAS SNP GRANEROS\_2015\_OPT harvest\_grain\_moisture

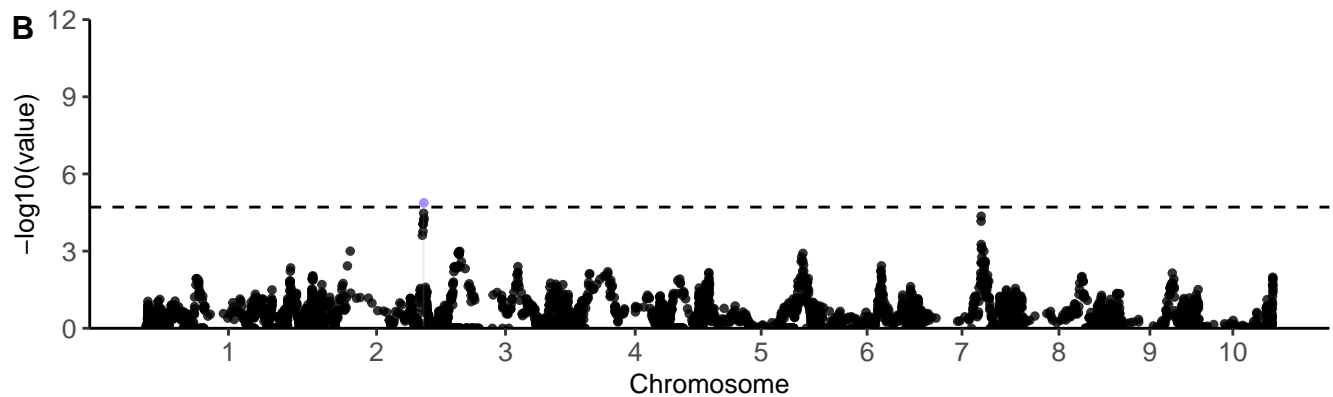

QTL F GRANEROS\_2015\_OPT harvest\_grain\_moisture

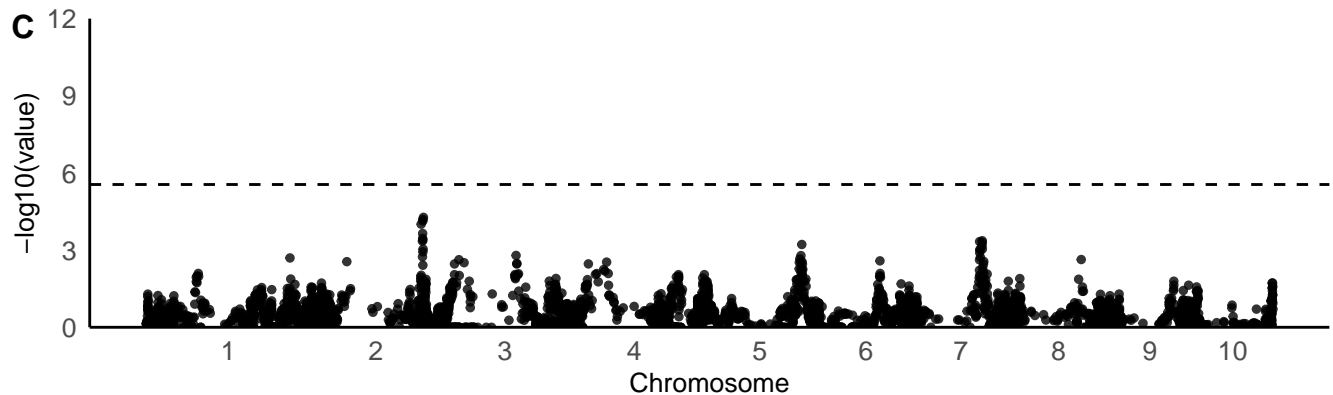

QTL H GRANEROS\_2015\_OPT harvest\_grain\_moisture
